# Supplementary material for: Serum metabolites associate with physical performance among middle-aged adults: Evidence from the Bogalusa Heart Study
Source: PubMed Central journal article supplement (PMC7343486; doi:10.18632/aging.103362), 2020-06-01
Supplement: aging-12-103362-s002..pdf [file aging-12-103362-s002..pdf]

## SUPPLEMENTARY TABLES

**Supplementary Table 1. Baseline characteristics of BHS Longitudinal Study Participants (N=288).**

|                                                  | Overall (N=288) | Female       |               | Male         |              |
|--------------------------------------------------|-----------------|--------------|---------------|--------------|--------------|
|                                                  |                 | Black (n=87) | White (n=109) | Black (n=26) | White (n=66) |
| Age, years, mean (SD)                            | 48.6 (5.2)      | 48.0 (5.4)   | 49.0 (4.9)    | 48.7 (5.6)   | 49.0 (5.1)   |
| Post-high school education, n (%)                | 124 (43.1)      | 25 (28.7)    | 59 (54.1)     | 5 (19.2)     | 35 (53.0)    |
| Smoking, n (%)                                   |                 |              |               |              |              |
| Never                                            | 164 (56.9)      | 52 (59.8)    | 66 (60.6)     | 11 (42.3)    | 35 (53.0)    |
| Former                                           | 88 (30.6)       | 23 (26.4)    | 33 (30.3)     | 8 (30.8)     | 24 (36.4)    |
| Current                                          | 36 (12.5)       | 12 (13.8)    | 10 (9.2)      | 7 (26.9)     | 7 (10.6)     |
| Drinking, n (%)                                  |                 |              |               |              |              |
| Never                                            | 56 (19.4)       | 26 (29.9)    | 19 (17.4)     | 5 (19.2)     | 6 (9.1)      |
| Former                                           | 87 (30.2)       | 26 (29.9)    | 32 (29.4)     | 9 (34.6)     | 20 (30.3)    |
| Current                                          | 145 (50.4)      | 35 (40.2)    | 58 (53.2)     | 12 (46.2)    | 40 (60.6)    |
| BMI, kg/m <sup>2</sup> , mean (SD)               | 31.0 (7.7)      | 34.6 (9.8)   | 29.3 (6.5)    | 29.8 (7.3)   | 29.6 (4.3)   |
| SBP, mmHg, mean (SD)                             | 121.7 (16.0)    | 123.4 (20.5) | 116.3 (12.8)  | 129.0 (13.2) | 125.6 (12.2) |
| Hypertension*, n (%)                             | 172 (59.7)      | 62 (71.3)    | 49 (45.0)     | 21 (80.8)    | 40 (60.6)    |
| Glucose, mg/dL, mean (SD)                        | 104.9 (33.6)    | 105.8 (39.9) | 103.6 (35.2)  | 105.7 (24.9) | 105.4 (23.8) |
| Diabetes†, n (%)                                 | 49 (17.2)       | 16 (18.4)    | 18 (16.8)     | 8 (30.8)     | 7 (10.8)     |
| eGFR, mL/min/1.73 m <sup>2</sup> , mean (SD)     | 95.5 (17.1)     | 100.6 (19.6) | 92.8 (13.7)   | 100.6 (17.2) | 91.4 (16.6)  |
| CKD (GFR‡<60 mL/min/1.73 m <sup>2</sup> ), n (%) | 8 (2.8)         | 2 (2.3)      | 3 (2.8)       | 0 (0.0)      | 3 (4.6)      |
| SPPB score                                       | 11.1 (1.4)      | 10.5 (1.8)   | 11.4 (1.0)    | 10.8 (2.0)   | 11.4 (0.9)   |
| Six-minute walk distance (m)                     | 419.4 (91.1)    | 369.3 (77.1) | 430.5 (91.7)  | 422.0 (85.7) | 464.6 (79.8) |
| Gait speed (m/s)                                 | 1.2 (0.3)       | 1.0 (0.2)    | 1.2 (0.3)     | 1.2 (0.2)    | 1.3 (0.2)    |
| Grip strength (kg)                               | 32.8 (11.6)     | 27.1 (6.6)   | 26.3 (6.1)    | 42.6 (9.2)   | 46.8 (9.5)   |

**Supplementary Table 2. Gait Speed Metabolites from Main Findings in Sensitivity Analysis Additionally Adjusting for Fasting Glucose, Systolic Blood Pressure, and Low-Density Lipoprotein.**

| Pathway                                          | Metabolite                   | Beta (SE)    | P                    |
|--------------------------------------------------|------------------------------|--------------|----------------------|
| Amino Acid                                       |                              |              |                      |
| Alanine and Aspartate Metabolism                 | N-acetylalanine              | -0.17 (0.03) | 4.7×10 <sup>-7</sup> |
| Alanine and Aspartate Metabolism                 | N-acetylaspartate (NAA)      | -0.13 (0.02) | 1.3×10 <sup>-7</sup> |
| Glutathione Metabolism                           | 2-aminobutyrate              | 0.09 (0.02)  | 2.3×10 <sup>-7</sup> |
| Leucine, Isoleucine and Valine Metabolism        | Isovalerate (i5:0)           | 0.08 (0.02)  | 1.1×10 <sup>-7</sup> |
| Methionine, Cysteine, SAM and Taurine Metabolism | N-formylmethionine           | -0.14 (0.03) | 2.7×10 <sup>-7</sup> |
| Methionine, Cysteine, SAM and Taurine Metabolism | S-adenosylhomocysteine (SAH) | -0.02 (0.01) | 9.7×10 <sup>-5</sup> |
| Phenylalanine Metabolism                         | 1-carboxyethylphenylalanine  | -0.04 (0.01) | 2.0×10 <sup>-6</sup> |
| Polyamine Metabolism                             | N-acetyl-isoputrescine*      | -0.05 (0.01) | 5.00E-06             |
| Tryptophan Metabolism                            | C-glycosyltryptophan         | -0.05 (0.01) | 4.90E-05             |
| Carbohydrate                                     |                              |              |                      |

|                                            |                                                        |              |                       |
|--------------------------------------------|--------------------------------------------------------|--------------|-----------------------|
| Aminosugar Metabolism                      | N-acetylneuraminate                                    | -0.06 (0.01) | 7.6×10 <sup>-7</sup>  |
| Cofactors and Vitamins                     |                                                        |              |                       |
| Ascorbate and Aldarate Metabolism          | Oxalate                                                | 0.06 (0.01)  | 6.9×10 <sup>-9</sup>  |
| Lipid                                      |                                                        |              |                       |
| Fatty Acid Metabolism(Acyl Carnitine)      | Suberoylcarnitine (C8-DC)                              | -0.02 (0.00) | 1.0×10 <sup>-7</sup>  |
| Lysophospholipid                           | 1-linoleoyl-GPC (18:2)                                 | 0.17 (0.03)  | 5.1×10 <sup>-8</sup>  |
| Plasmalogen                                | 1-(1-enyl-palmitoyl)-2-arachidonoyl-GPE (P-16:0/20:4)* | 0.07 (0.02)  | 4.4×10 <sup>-6</sup>  |
| Sphingolipid Metabolism                    | Behenoyl sphingomyelin (d18:1/22:0)*                   | 0.21 (0.04)  | 4.2×10 <sup>-9</sup>  |
| Sphingolipid Metabolism                    | Sphingomyelin (40:2)*                                  | 0.18 (0.04)  | 2.2×10 <sup>-6</sup>  |
| Sphingolipid Metabolism                    | Sphingomyelin (43:1)*                                  | 0.08 (0.01)  | 1.1×10 <sup>-9</sup>  |
| Nucleotide                                 |                                                        |              |                       |
| Purine Metabolism, Adenine containing      | N1-methyladenosine                                     | -0.29 (0.04) | 2.9×10 <sup>-11</sup> |
| Purine Metabolism, Adenine containing      | N6-carbamoylthreonyladenosine                          | -0.05 (0.01) | 1.0×10 <sup>-4</sup>  |
| Purine Metabolism, Guanine containing      | 7-methylguanine                                        | -0.18 (0.03) | 2.6×10 <sup>-8</sup>  |
| Purine Metabolism, Guanine containing      | N2,N2-dimethylguanosine                                | -0.08 (0.02) | 8.1×10 <sup>-7</sup>  |
| Pyrimidine Metabolism, Cytidine containing | N4-acetylcytidine                                      | -0.06 (0.01) | 7.9×10 <sup>-10</sup> |
| Pyrimidine Metabolism, Uracil containing   | 5,6-dihydrouridine                                     | -0.13 (0.02) | 1.9×10 <sup>-10</sup> |
| Pyrimidine Metabolism, Uracil containing   | Pseudouridine                                          | -0.09 (0.02) | 4.3×10 <sup>-8</sup>  |
| Pyrimidine Metabolism, Uracil containing   | Uridine                                                | 0.14 (0.03)  | 2.4×10 <sup>-6</sup>  |
| Peptide                                    |                                                        |              |                       |
| Gamma-glutamyl Amino Acid                  | Gamma-glutamyl-2-aminobutyrate                         | 0.06 (0.01)  | 1.9×10 <sup>-7</sup>  |
| Gamma-glutamyl Amino Acid                  | Gamma-glutamylphenylalanine                            | -0.11 (0.02) | 8.8×10 <sup>-6</sup>  |
| Xenobiotics                                |                                                        |              |                       |
| Bacterial/Fungal                           | Tartronate                                             | 0.07 (0.01)  | 1.7×10 <sup>-9</sup>  |
| Chemical                                   | 4-hydroxychlorothalonil                                | 0.06 (0.01)  | 2.9×10 <sup>-7</sup>  |
| Food Component/Plant                       | Ergothioneine                                          | 0.06 (0.01)  | 1.5×10 <sup>-7</sup>  |
| Food Component/Plant                       | Phytanate                                              | 0.04 (0.01)  | 1.5×10 <sup>-7</sup>  |
| Unnamed                                    |                                                        |              |                       |
|                                            | X - 11315 (m/z=128.07154, RI=1157)                     | 0.09 (0.01)  | 6.8×10 <sup>-10</sup> |
|                                            | X - 18914 (m/z=266.88894, RI=4503)                     | 0.08 (0.02)  | 1.4×10 <sup>-7</sup>  |
|                                            | X - 21471 (m/z=295.11196, RI=4039)                     | -0.03 (0.01) | 1.3×10 <sup>-5</sup>  |
|                                            | X - 24337 (m/z=239.07856, RI=1980)                     | -0.04 (0.01) | 2.0×10 <sup>-6</sup>  |
|                                            | X - 24513 (m/z=149.05558, RI=1148)                     | -0.05 (0.01) | 6.4×10 <sup>-5</sup>  |

SE=standard error. \* Indicates compounds with Metabolomics Standards Initiative confidence level 2.

**Supplementary Table 3. Grip Strength Metabolites from Main Findings in Sensitivity Analysis Additionally Adjusting for Fasting Glucose, Systolic Blood Pressure, and Low-Density Lipoprotein.**

| Pathway                                    | Metabolite                  | Beta (SE)     | P                     |
|--------------------------------------------|-----------------------------|---------------|-----------------------|
| Amino Acid                                 |                             |               |                       |
| Polyamine Metabolism                       | 5-methylthioadenosine (MTA) | -3.79 (0.75)  | 5.7×10 <sup>-7</sup>  |
| Tryptophan Metabolism                      | C-glycosyltryptophan        | -2.08 (0.46)  | 6.5×10 <sup>-6</sup>  |
| Carbohydrate                               |                             |               |                       |
| Aminosugar Metabolism                      | N-acetylneuraminate         | -2.09 (0.47)  | 9.5×10 <sup>-6</sup>  |
| Nucleotide                                 |                             |               |                       |
| Purine Metabolism, Adenine containing      | N1-methyladenosine          | -10.05 (1.53) | 8.3×10 <sup>-11</sup> |
| Pyrimidine Metabolism, Cytidine containing | N4-acetylcytidine           | -1.2 (0.32)   | 2.0×10 <sup>-4</sup>  |
| Pyrimidine Metabolism, Uracil containing   | 5,6-dihydrouridine          | -4.08 (0.73)  | 3.1×10 <sup>-8</sup>  |
| Pyrimidine Metabolism, Uracil containing   | Pseudouridine               | -3.05 (0.57)  | 1.1×10 <sup>-7</sup>  |

**Supplementary Table 4. All associations with longitudinal change in gait speed between baseline and follow up.**

| Pathway                                     | Metabolite                                                         | Beta (SE)    | P-Value                 |
|---------------------------------------------|--------------------------------------------------------------------|--------------|-------------------------|
| <u>Positive in Cross-Sectional Analysis</u> |                                                                    |              |                         |
| Amino Acid                                  |                                                                    |              |                         |
| Glutathione Metabolism                      | 2-aminobutyrate                                                    | 0.04 (0.03)  | 0.20                    |
| Leucine, Isoleucine and Valine Metabolism   | Isovalerate (i5:0)                                                 | -0.01 (0.03) | 0.75                    |
| Cofactors and Vitamins                      |                                                                    |              |                         |
| Ascorbate and Aldarate Metabolism           | Oxalate                                                            | 0.03 (0.02)  | 0.13                    |
| Lipid                                       |                                                                    |              |                         |
| Lysophospholipid                            | 1-linoleoyl-GPC (18:2)                                             | 0.06 (0.06)  | 0.36                    |
| Plasmalogen                                 | 1-(1-enyl-palmitoyl)-2-arachidonoyl-GPE (P-16:0/20:4) <sub>a</sub> | -0.02 (0.04) | 0.55                    |
| Sphingolipid Metabolism                     | Behenoyl sphingomyelin (d18:1/22:0) <sub>a</sub>                   | 0.15 (0.06)  | 0.02 *                  |
|                                             | Sphingomyelin (40:2) <sub>a</sub>                                  | 0.26 (0.07)  | 2.6×10 <sup>-4</sup> ** |
|                                             | Sphingomyelin (43:1) <sub>a</sub>                                  | 0.05 (0.03)  | 0.07                    |
| Nucleotide                                  |                                                                    |              |                         |
| Pyrimidine Metabolism, Uracil containing    | Uridine                                                            | 0.07 (0.06)  | 0.28                    |
| Xenobiotics                                 |                                                                    |              |                         |
| Bacterial/Fungal                            | Tartronate                                                         | 0.05 (0.03)  | 0.08                    |
| Chemical                                    | 4-hydroxychlorothalonil                                            | -0.02 (0.02) | 0.38                    |
| Food Component/Plant                        | Ergothioneine                                                      | -0.05 (0.02) | 9.6×10 <sup>-3</sup>    |
|                                             | Phytanate                                                          | 0.02 (0.02)  | 0.33                    |
| Unnamed                                     |                                                                    |              |                         |
|                                             | X - 11315 (m/z=128.07154, RI=1157)                                 | 0.01 (0.03)  | 0.70                    |
|                                             | X - 18914 (m/z=266.88894, RI=4503)                                 | 0.05 (0.03)  | 0.16                    |
| <u>Negative in Cross-Sectional Analysis</u> |                                                                    |              |                         |
| Amino Acid                                  |                                                                    |              |                         |
| Alanine and Aspartate Metabolism            | N-acetylalanine                                                    | -0.12 (0.07) | 0.08                    |
|                                             | N-acetylaspartate (NAA)                                            | -0.13 (0.06) | 0.04 *                  |
| Methionine, Cysteine, SAM and Taurine       | N-formylmethionine                                                 | -0.12 (0.05) | 0.01 *                  |

|                                            |                                    |              |                         |
|--------------------------------------------|------------------------------------|--------------|-------------------------|
| Metabolism                                 | S-adenosylhomocysteine (SAH)       | -0.03 (0.01) | 0.02 *                  |
| Phenylalanine Metabolism                   | l-carboxyethylphenylalanine        | -0.09 (0.02) | 8.8×10 <sup>-5</sup> ** |
| Polyamine Metabolism                       | N-acetyl-isoputrescine             | -0.03 (0.02) | 0.15                    |
| Tryptophan Metabolism                      | C-glycosyltryptophan               | -0.04 (0.02) | 0.09                    |
| Carbohydrate                               |                                    |              |                         |
| Aminosugar Metabolism                      | N-acetylneuraminic acid            | -0.05 (0.03) | 0.04 *                  |
| Lipid                                      |                                    |              |                         |
| Fatty Acid Metabolism(Acyl Carnitine)      | Suberoylcarnitine (C8-DC)          | -0.01 (0.01) | 0.21                    |
| Nucleotide                                 |                                    |              |                         |
| Purine Metabolism, Adenine containing      | N1-methyladenosine                 | -0.08 (0.11) | 0.44                    |
| Purine Metabolism, Adenine containing      | N6-carbamoylthreonyladenosine      | -0.04 (0.02) | 0.06                    |
| Purine Metabolism, Guanine containing      | 7-methylguanine                    | -0.06 (0.08) | 0.48                    |
| Purine Metabolism, Guanine containing      | N2,N2-dimethylguanosine            | -0.05 (0.03) | 0.05 *                  |
| Pyrimidine Metabolism, Cytidine containing | N4-acetylcytidine                  | -0.02 (0.02) | 0.21                    |
| Pyrimidine Metabolism, Uracil containing   | 5,6-dihydrouridine                 | -0.08 (0.04) | 0.05                    |
| Pyrimidine Metabolism, Uracil containing   | Pseudouridine                      | -0.06 (0.04) | 0.09                    |
| Peptide                                    |                                    |              |                         |
| Gamma-glutamyl Amino Acid                  | Gamma-glutamylphenylalanine        | -0.12 (0.05) | 0.03 *                  |
| Unnamed                                    |                                    |              |                         |
|                                            | X - 21471 (m/z=295.11196, RI=4039) | -0.03 (0.02) | 0.10                    |
|                                            | X - 24337 (m/z=239.07856, RI=1980) | -0.06 (0.02) | 1.70E-03                |
|                                            | X - 24513 (m/z=149.05558, RI=1148) | -0.05 (0.02) | 0.04                    |

<sup>a</sup> Indicates compounds that have not been officially confirmed based on a standard.

\* P<0.05.

\*\* Significant at a Bonferroni corrected level for 33 tests (P<1.5×10<sup>-3</sup>).
