# Supplementary material for: Serum metabolites associate with physical performance among middle-aged adults: Evidence from the Bogalusa Heart Study
Source: Aging (Albany NY). 2020 Jun 1;12(12):11914–41. doi: 10.18632/aging.103362 (PMC7343486; doi:10.18632/aging.103362)
Supplement: Supplementary Data [file aging-12-103362-s001..xlsx]

## Sheet: Sheet1
Pathway	Sub-Pathway	Metabolite	Compound ID	PubChem ID	KEGG ID	HMDB ID	Platform	Retention Index	Mass	Percent Missing	Identification Level	Gait Speed Beta Black Female	Gait Speed SE Black Female	Gait Speed P Black Female	Gait Speed Beta White Female	Gait Speed SE White Female	Gait Speed P White Female	Gait Speed Beta Black Male	Gait Speed SE Black Male	Gait Speed P Black Male	Gait Speed Beta White Male	Gait Speed SE White Male	Gait Speed P White Male	Gait Speed Beta Overall	Gait Speed SE Overall	Gait Speed P Overall	Gait Speed Beta Black	Gait Speed SE Black	Gait Speed P Black	Gait Speed Beta White	Gait Speed SE White	Gait Speed P White	Gait Speed Beta Female	Gait Speed SE Female	Gait Speed P Female	Gait Speed Beta Male	Gait Speed SE Male	Gait Speed P Male	Gait Speed P Interaction Race	Gait Speed P Interaction Sex	Grip Strength Beta Black Female	Grip Strength SE Black Female	Grip Strength P Black Female	Grip Strength Beta White Female	Grip Strength SE White Female	Grip Strength P White Female	Grip Strength Beta Black Male	Grip Strength SE Black Male	Grip Strength P Black Male
Amino Acid	Alanine and Aspartate Metabolism	Alanine	1126	5950	C00041	HMDB00161	LC/MS Pos Early	1700	90.055	0	1	0.04	0.06	0.53	-0.09	0.04	0.033	0.12	0.1	0.23	-0.02	0.07	0.82	-0.04	0.03	0.25	0.05	0.05	0.38	-0.07	0.04	0.08	-0.06	0.03	0.11	0.01	0.06	0.84	5.2e-06	4.5e-09	3.23	2.24	0.15	1.21	1.24	0.33	-0.25	4.22	0.95
Amino Acid	Alanine and Aspartate Metabolism	Asparagine	512	6267	C00152	HMDB00168	LC/MS Pos Early	1225	133.061	0	1	0.11	0.08	0.17	0.09	0.07	0.18	-0.01	0.13	0.96	-0.01	0.09	0.93	0.05	0.04	0.26	0.05	0.07	0.43	0.04	0.05	0.47	0.1	0.05	0.054	0	0.07	0.97	1.1e-06	1.1e-07	5	3.02	0.099	5.73	1.87	0.0024	-2.84	4.98	0.57
Amino Acid	Alanine and Aspartate Metabolism	Aspartate	443	5960	C00049	HMDB00191	LC/MS Pos Early	1165	134.045	0	1	0.02	0.05	0.66	-0.08	0.04	0.049	-0.12	0.06	0.026	-0.07	0.05	0.19	-0.07	0.02	0.003	-0.06	0.04	0.095	-0.07	0.03	0.019	-0.04	0.03	0.18	-0.1	0.04	0.0087	1.7e-06	4.5e-08	-1.88	1.78	0.29	-1.28	1.12	0.25	-2.95	2.47	0.23
Amino Acid	Alanine and Aspartate Metabolism	N-acetylalanine	1585	88064	C02847	HMDB00766	LC/MS Neg	861.2	130.051	0	1	-0.13	0.08	0.11	-0.25	0.07	0.00065	-0.13	0.07	0.052	-0.25	0.07	0.00041	-0.17	0.03	3.3e-07	-0.11	0.05	0.017	-0.23	0.05	3.4e-06	-0.21	0.05	0.00017	-0.19	0.05	0.0001	7.3e-05	4.1e-10	-2.42	2.72	0.37	-3.18	1.98	0.11	-3.36	2.78	0.23
Amino Acid	Alanine and Aspartate Metabolism	N-acetylasparagine	33942	99715		HMDB06028	LC/MS Pos Early	785	175.071	0	1	0	0.02	0.87	0.02	0.03	0.42	-0.05	0.02	0.0045	0	0.03	1	-0.02	0.01	0.047	-0.03	0.01	0.0095	0.01	0.02	0.62	0	0.01	0.82	-0.04	0.02	0.013	1e-05	9.9e-05	-0.05	0.65	0.94	1.08	0.71	0.13	-0.85	0.79	0.29
Amino Acid	Alanine and Aspartate Metabolism	N-acetylaspartate (NAA)	22185	65065	C01042	HMDB00812	LC/MS Neg	620.5	174.041	0	1	-0.08	0.05	0.11	-0.07	0.04	0.071	-0.14	0.05	0.0094	-0.26	0.06	2.1e-05	-0.13	0.02	1.2e-07	-0.11	0.04	0.0016	-0.14	0.03	4.9e-05	-0.08	0.03	0.013	-0.2	0.04	6.3e-07	0.00022	4.4e-06	-4.13	1.86	0.027	-2.05	1.09	0.06	-3.19	2.33	0.17
Amino Acid	Alanine and Aspartate Metabolism	N-carbamoylalanine	52340	426409			LC/MS Pos Early	950	133.061	3.1721	1	0	0.02	0.81	-0.01	0.01	0.55	-0.01	0.02	0.75	-0.01	0.02	0.7	0	0.01	0.61	0	0.01	0.99	-0.01	0.01	0.47	0	0.01	0.65	0	0.01	0.75	0.00017	2.1e-06	-0.44	0.68	0.52	-0.06	0.36	0.88	-0.79	0.91	0.39
Amino Acid	Creatine Metabolism	Creatine	27718	586	C00300	HMDB00064	LC/MS Pos Early	1947	132.077	0	1	-0.01	0.03	0.78	0.04	0.02	0.098	-0.05	0.05	0.34	-0.02	0.04	0.53	0.01	0.02	0.67	-0.01	0.02	0.8	0.02	0.02	0.43	0.02	0.02	0.28	-0.03	0.03	0.29	1.3e-06	9.3e-07	-0.89	1.11	0.42	0.25	0.69	0.72	0.07	2.12	0.97
Amino Acid	Creatine Metabolism	Creatinine	513	588	C00791	HMDB00562	LC/MS Pos Early	2055	114.066	0	1	-0.17	0.13	0.2	0.03	0.12	0.82	-0.09	0.09	0.32	-0.15	0.09	0.091	-0.07	0.05	0.12	-0.08	0.06	0.21	-0.08	0.07	0.25	-0.06	0.09	0.53	-0.12	0.07	0.06	0.00017	2.6e-08	3.68	4.82	0.45	-0.8	3.43	0.82	-2.32	4	0.56
Amino Acid	Creatine Metabolism	Guanidinoacetate	43802	763	C00581	HMDB00128	LC/MS Polar	2884	116.047	0	1	-0.05	0.04	0.23	0.04	0.04	0.27	-0.04	0.04	0.32	-0.04	0.03	0.26	-0.02	0.02	0.27	-0.04	0.03	0.19	-0.01	0.02	0.73	0	0.03	0.86	-0.04	0.03	0.15	1.2e-06	1.7e-06	1.07	1.66	0.52	0.44	0.97	0.65	1.62	1.74	0.35
Amino Acid	Glutamate Metabolism	2-pyrrolidinone	31675	12025		HMDB02039	LC/MS Pos Early	1262	86.06	0	1	.	.	.	.	.	.	.	.	.	.	.	.	.	.	.	.	.	.	.	.	.	.	.	.	.	.	.	.	.	.	.	.	.	.	.	.	.	.
Amino Acid	Glutamate Metabolism	Beta-citrylglutamate	54923	72715786	C20775		LC/MS Neg	530	320.062	4.5202	1	0	0.02	0.88	0	0.02	0.99	-0.01	0.02	0.73	-0.05	0.02	0.0013	-0.02	0.01	0.023	0	0.02	0.99	-0.03	0.01	0.0079	0	0.02	0.9	-0.04	0.01	0.0032	0.0011	1.5e-05	-0.5	0.86	0.56	-1.09	0.56	0.054	0.1	0.94	0.92
Amino Acid	Glutamate Metabolism	Carboxyethyl-GABA	40007	2572		HMDB02201	LC/MS Pos Early	2085	176.092	17.6844	1	0.01	0.03	0.78	-0.06	0.02	0.0079	-0.04	0.03	0.14	-0.06	0.03	0.019	-0.04	0.01	0.00061	-0.02	0.02	0.35	-0.06	0.02	0.0007	-0.04	0.02	0.034	-0.05	0.02	0.0057	0.00026	3.2e-07	-0.33	1.13	0.77	-1.34	0.63	0.035	-0.6	1.15	0.6
Amino Acid	Glutamate Metabolism	Gamma-carboxyglutamate	38754	40772		HMDB41900	LC/MS Polar	4200	190.036	99.9207	1	.	.	.	.	.	.	.	.	.	.	.	.	.	.	.	.	.	.	.	.	.	.	.	.	.	.	.	.	.	.	.	.	.	.	.	.	.	.
Amino Acid	Glutamate Metabolism	Glutamate	57	611	C00025	HMDB00148	LC/MS Pos Early	1500	148.06	0	1	-0.03	0.03	0.36	-0.08	0.02	0.0002	0	0.04	0.89	-0.04	0.03	0.16	-0.04	0.01	0.0021	0	0.02	0.99	-0.05	0.02	0.00075	-0.06	0.02	0.00014	-0.03	0.02	0.2	0.00018	6.4e-12	-0.39	1.08	0.72	-1.36	0.57	0.017	0.74	1.57	0.64
Amino Acid	Glutamate Metabolism	Glutamine	53	5961	C00064	HMDB00641	LC/MS Pos Early	1291	147.076	0	1	-0.03	0.09	0.77	-0.09	0.07	0.19	0.04	0.12	0.74	-0.04	0.1	0.72	-0.05	0.04	0.25	-0.01	0.07	0.88	-0.07	0.06	0.2	-0.07	0.05	0.22	0	0.08	0.99	9e-07	6.7e-09	5.73	3.33	0.087	1.82	1.97	0.36	-1.33	5.09	0.79
Amino Acid	Glutamate Metabolism	N-acetyl-aspartyl-glutamate (NAAG)	35665	5255	C12270	HMDB01067	LC/MS Pos Early	1035	305.098	3.6479	1	0	0.04	0.97	0	0.02	0.97	0.04	0.04	0.28	-0.01	0.02	0.54	0	0.01	0.94	0.02	0.03	0.36	-0.01	0.01	0.52	0	0.02	0.89	0	0.02	0.92	0.00011	1.1e-06	0.82	1.36	0.54	-0.12	0.6	0.85	0.7	1.64	0.67
Amino Acid	Glutamate Metabolism	N-acetylglutamate	15720	70914	C00624	HMDB01138	LC/MS Pos Early	1050	190.071	0.0793	1	-0.01	0.02	0.68	-0.08	0.03	0.0019	-0.05	0.02	0.025	-0.06	0.03	0.031	-0.05	0.01	4.1e-05	-0.03	0.02	0.03	-0.07	0.02	0.00023	-0.04	0.02	0.015	-0.06	0.02	0.0016	0.0021	1.1e-06	-0.8	0.72	0.27	-1.06	0.66	0.11	-1.39	1.04	0.18
Amino Acid	Glutamate Metabolism	N-acetylglutamine	33943	182230	C02716	HMDB06029	LC/MS Polar	2140	187.072	0.0793	1	-0.04	0.02	0.064	-0.02	0.02	0.27	-0.05	0.02	0.016	-0.03	0.02	0.16	-0.04	0.01	0.00028	-0.05	0.01	0.0012	-0.03	0.02	0.078	-0.03	0.01	0.031	-0.05	0.02	0.0056	3.7e-05	1.4e-06	-1.24	0.73	0.09	0.08	0.59	0.9	-1.06	0.92	0.25
Amino Acid	Glutamate Metabolism	Pyroglutamine*	46225	134508			LC/MS Pos Early	1900	129.066	0	2	-0.03	0.02	0.058	-0.01	0.02	0.46	0	0.01	0.89	-0.02	0.01	0.11	-0.02	0.01	0.0032	-0.02	0.01	0.04	-0.02	0.01	0.031	-0.02	0.01	0.096	-0.02	0.01	0.11	0.00034	3.6e-07	-0.62	0.61	0.31	-0.24	0.45	0.6	0.09	0.54	0.87
Amino Acid	Glutamate Metabolism	S-1-pyrroline-5-carboxylate	42370	1196	C04322	HMDB01301	LC/MS Pos Early	1528	114.055	5.2339	1	0	0.02	0.86	-0.01	0.02	0.62	-0.03	0.03	0.21	-0.03	0.03	0.27	-0.02	0.01	0.1	-0.02	0.02	0.28	-0.02	0.02	0.25	-0.01	0.02	0.6	-0.04	0.02	0.077	0.00028	2.6e-06	1.63	0.92	0.076	0.27	0.62	0.67	-0.96	1.15	0.4
Amino Acid	Glutathione Metabolism	2-aminobutyrate	42374	439691	C02261	HMDB00650	LC/MS Pos Early	2059	104.071	0	1	0.06	0.04	0.11	0.1	0.03	4.3e-05	0.03	0.05	0.55	0.08	0.03	0.014	0.08	0.02	2.8e-06	0.04	0.03	0.15	0.09	0.02	6e-06	0.09	0.02	1.7e-05	0.06	0.03	0.02	2.8e-06	1.1e-05	0.44	1.35	0.74	2.16	0.73	0.0033	2.71	2.05	0.19
Amino Acid	Glutathione Metabolism	2-hydroxybutyrate/2-hydroxyisobutyrate	52281				LC/MS Polar	1258	103.04	0	1	0	0.02	0.99	0.02	0.02	0.13	-0.04	0.03	0.18	0.02	0.02	0.23	0.01	0.01	0.3	-0.02	0.02	0.24	0.02	0.01	0.049	0.01	0.01	0.23	0	0.02	0.88	1.8e-07	3e-06	-1.51	0.74	0.042	0.72	0.43	0.096	0.51	1.23	0.68
Amino Acid	Glutathione Metabolism	5-oxoproline	1494	7405	C01879	HMDB00267	LC/MS Neg	738.5	128.035	0	1	0.06	0.07	0.42	-0.03	0.06	0.53	-0.02	0.11	0.87	-0.04	0.08	0.61	-0.02	0.04	0.54	0.01	0.06	0.85	-0.04	0.05	0.37	0	0.04	0.94	-0.03	0.06	0.67	3.6e-06	2.1e-08	3.63	2.75	0.19	1.41	1.58	0.37	-0.04	4.71	0.99
Amino Acid	Glutathione Metabolism	Cys-gly, oxidized	18368	333293			LC/MS Pos Early	2947	355.074	0	1	-0.03	0.03	0.34	-0.02	0.02	0.48	0.08	0.04	0.07	0	0.03	0.98	0	0.02	0.88	0.02	0.03	0.4	-0.01	0.02	0.55	-0.02	0.02	0.24	0.03	0.03	0.31	2.1e-05	5.7e-09	0.9	1.19	0.45	0.78	0.69	0.26	1.12	1.82	0.54
Amino Acid	Glutathione Metabolism	Cysteine-glutathione disulfide	35159	4247235		HMDB00656	LC/MS Pos Early	2465	427.095	0	1	0.06	0.02	0.011	0.04	0.02	0.0098	0.02	0.04	0.53	0.02	0.02	0.32	0.04	0.01	0.00021	0.05	0.02	0.0081	0.03	0.01	0.011	0.04	0.01	0.00034	0.03	0.02	0.12	0.0019	6.5e-07	0.01	0.82	0.99	0.44	0.44	0.32	2.97	1.52	0.054
Amino Acid	Glutathione Metabolism	Cysteinylglycine	35637	439498	C01419	HMDB00078	LC/MS Pos Early	2132	179.048	2.617	1	.	.	.	.	.	.	.	.	.	.	.	.	.	.	.	.	.	.	.	.	.	.	.	.	.	.	.	.	.	.	.	.	.	.	.	.	.	.
Amino Acid	Glycine, Serine and Threonine Metabolism	Betaine	3141	247	C00719	HMDB00043	LC/MS Pos Early	1064	118.086	0	1	-0.1	0.05	0.033	0.02	0.04	0.64	-0.11	0.05	0.031	-0.02	0.05	0.65	-0.05	0.02	0.021	-0.12	0.03	0.00043	0	0.03	0.91	-0.02	0.03	0.43	-0.07	0.04	0.047	3e-07	3.2e-08	-5.23	1.75	0.0031	1.19	1.02	0.24	-3.44	2.09	0.1
Amino Acid	Glycine, Serine and Threonine Metabolism	Dimethylglycine	5086	673	C01026	HMDB00092	LC/MS Pos Early	1104	104.071	0	1	-0.03	0.03	0.24	0.01	0.02	0.53	-0.06	0.03	0.037	-0.02	0.02	0.35	-0.02	0.01	0.098	-0.05	0.02	0.0074	0	0.01	0.77	0	0.01	0.95	-0.04	0.02	0.025	1.3e-07	1.7e-05	-1.71	1.12	0.13	0.38	0.37	0.31	-1.78	1.24	0.15
Amino Acid	Glycine, Serine and Threonine Metabolism	Glycine	58	750	C00037	HMDB00123	LC/MS Pos Early	1375	76.0393	0	1	-0.03	0.04	0.48	0	0.03	0.94	-0.11	0.07	0.15	-0.05	0.07	0.45	-0.02	0.02	0.31	-0.06	0.03	0.11	-0.01	0.03	0.7	-0.01	0.02	0.77	-0.08	0.05	0.14	3.7e-07	4.5e-06	-0.83	1.45	0.57	-0.58	0.73	0.43	-0.55	3.25	0.87
Amino Acid	Glycine, Serine and Threonine Metabolism	N-acetylglycine	27710	10972		HMDB00532	LC/MS Pos Early	826	118.05	0	1	-0.03	0.02	0.14	0.01	0.01	0.12	-0.01	0.02	0.75	0.04	0.02	0.11	0.01	0.01	0.25	-0.02	0.01	0.11	0.02	0.01	0.042	0.01	0.01	0.38	0.01	0.02	0.36	1.7e-08	7e-06	-1.03	0.64	0.11	-0.48	0.26	0.071	-0.27	0.87	0.76
Amino Acid	Glycine, Serine and Threonine Metabolism	N-acetylserine	37076	65249		HMDB02931	LC/MS Pos Early	811	148.06	0	1	0.03	0.04	0.49	-0.1	0.04	0.009	-0.06	0.03	0.026	-0.1	0.03	0.004	-0.06	0.02	0.0002	-0.04	0.02	0.1	-0.09	0.02	0.00023	-0.05	0.03	0.077	-0.08	0.02	0.00065	0.00048	2.6e-08	-0.27	1.62	0.87	-2.12	1.11	0.057	-1.45	1.23	0.24
Amino Acid	Glycine, Serine and Threonine Metabolism	N-acetylthreonine	33939	152204			LC/MS Neg	821.6	160.062	0	1	-0.03	0.05	0.54	-0.08	0.05	0.07	-0.06	0.03	0.072	-0.08	0.03	0.0069	-0.06	0.02	0.00057	-0.05	0.02	0.062	-0.06	0.02	0.003	-0.06	0.03	0.066	-0.07	0.02	0.0016	8.6e-05	1.4e-09	-4.88	1.74	0.0055	-1.21	1.25	0.33	-1.75	1.4	0.21
Amino Acid	Glycine, Serine and Threonine Metabolism	Sarcosine	1516	1088	C00213	HMDB00271	LC/MS Pos Early	1280	90.055	0.3965	1	-0.01	0	0.26	0	0.02	0.83	-0.02	0.02	0.31	-0.01	0.02	0.66	-0.01	0.01	0.13	-0.01	0.01	0.14	0	0.01	0.76	-0.01	0	0.3	-0.02	0.02	0.22	4.7e-05	4.3e-05	0.1	0.19	0.61	0.4	0.49	0.41	-0.6	0.93	0.52
Amino Acid	Glycine, Serine and Threonine Metabolism	Serine	1648	5951	C00065	HMDB00187	LC/MS Pos Early	1239	106.05	0	1	0.03	0.06	0.62	0.05	0.05	0.32	-0.11	0.11	0.33	-0.04	0.08	0.65	0.01	0.03	0.71	-0.01	0.05	0.89	0.02	0.04	0.66	0.04	0.04	0.24	-0.07	0.06	0.3	6.8e-07	9.5e-08	0.9	2.17	0.68	0.53	1.31	0.68	2.13	4.4	0.63
Amino Acid	Glycine, Serine and Threonine Metabolism	Threonine	1284	6288	C00188	HMDB00167	LC/MS Pos Early	1514	120.066	0	1	0.04	0.04	0.3	-0.01	0.03	0.64	0.04	0.07	0.58	-0.06	0.06	0.33	-0.01	0.02	0.74	0.03	0.04	0.34	-0.03	0.03	0.35	0	0.02	0.91	-0.03	0.05	0.56	9.2e-06	1e-07	2.23	1.47	0.13	2.71	0.89	0.0026	3.1	2.99	0.3
Amino Acid	Guanidino and Acetamido Metabolism	1-methylguanidine	48114	10111	C02294	HMDB01522	LC/MS Pos Early	2149	74.0713	73.5131	1	.	.	.	.	.	.	.	.	.	.	.	.	.	.	.	.	.	.	.	.	.	.	.	.	.	.	.	.	.	.	.	.	.	.	.	.	.	.
Amino Acid	Guanidino and Acetamido Metabolism	4-guanidinobutanoate	15681	500	C01035	HMDB03464	LC/MS Pos Early	2320	146.092	12.2918	1	0	0.01	0.86	0	0.01	0.9	-0.01	0.01	0.38	-0.01	0.01	0.15	-0.01	0	0.063	-0.01	0.01	0.29	-0.01	0.01	0.14	0	0.01	0.82	-0.01	0.01	0.066	0.0025	0.0066	-0.16	0.25	0.52	0	0.24	0.99	0.1	0.42	0.81
Amino Acid	Guanidino and Acetamido Metabolism	Guanidinosuccinate	32446	97856	C03139	HMDB03157	LC/MS Neg	640.2	174.052	19.3497	1	-0.01	0.01	0.13	0.06	0.01	7.5e-06	-0.01	0.01	0.55	0	0	0.25	0	0	0.72	-0.01	0.01	0.24	0	0	0.99	0.01	0.01	0.11	0	0	0.25	0.00068	0.067	-0.46	0.34	0.18	0.01	0.38	0.99	-0.22	0.44	0.62
Amino Acid	Histidine Metabolism	1-methyl-5-imidazoleacetate	47787				LC/MS Pos Early	2000	141.066	0	1	0	0.01	0.68	0.02	0.01	0.041	-0.01	0	0.061	0	0	0.24	0	0	0.18	0	0	0.084	0	0	0.83	0.01	0.01	0.15	0	0	0.04	0.014	0.031	0.14	0.4	0.73	0.14	0.25	0.56	-0.16	0.13	0.2
Amino Acid	Histidine Metabolism	1-methylhistidine	30460	92105	C01152	HMDB00001	LC/MS Neg	1227	168.078	0	1	-0.08	0.03	0.024	0.04	0.03	0.17	-0.05	0.02	0.0088	-0.03	0.02	0.18	-0.03	0.01	0.0064	-0.05	0.02	0.00046	-0.01	0.02	0.75	-0.01	0.02	0.8	-0.05	0.02	0.0029	3.6e-06	3.2e-07	-0.95	1.28	0.46	1.5	0.83	0.071	-1.36	0.83	0.1
Amino Acid	Histidine Metabolism	1-methylimidazoleacetate	32350	75810	C05828	HMDB02820	LC/MS Pos Early	2064	141.066	0	1	-0.06	0.04	0.097	-0.08	0.03	0.0043	-0.03	0.02	0.16	-0.05	0.02	0.032	-0.04	0.01	0.00072	-0.02	0.01	0.089	-0.05	0.02	0.0019	-0.08	0.02	0.00065	-0.03	0.01	0.015	0.00069	6.5e-10	-0.91	1.07	0.39	0.21	0.51	0.68	-0.67	0.78	0.39
Amino Acid	Histidine Metabolism	1-ribosyl-imidazoleacetate*	46663				LC/MS Pos Early	2017	259.092	0	2	0	0.01	0.75	-0.03	0.02	0.083	-0.01	0.01	0.41	-0.05	0.02	0.0072	-0.01	0.01	0.045	0	0.01	0.82	-0.04	0.01	0.0034	-0.01	0.01	0.14	-0.02	0.01	0.041	0.036	1.9e-05	-0.09	0.38	0.81	-0.12	0.38	0.75	-0.27	0.6	0.66
Amino Acid	Histidine Metabolism	3-methylhistidine	15677	64969	C01152	HMDB00479	LC/MS Neg	906.3	168.078	0	1	0.01	0.01	0.51	0.02	0.01	0.00069	-0.01	0.01	0.44	0.02	0.01	0.056	0.01	0	0.00093	0	0.01	0.96	0.02	0.01	0.00016	0.02	0.01	0.0011	0.01	0.01	0.16	8.9e-08	0.00079	0.22	0.35	0.53	0.44	0.2	0.029	-0.44	0.57	0.44
Amino Acid	Histidine Metabolism	4-imidazoleacetate	32349	96215	C02835	HMDB02024	LC/MS Polar	2236	125.036	67.0103	1	0	0.02	0.83	0	0.01	0.9	0.02	0.02	0.38	0.01	0.02	0.49	0.01	0.01	0.31	0.01	0.01	0.43	0.01	0.01	0.56	0	0.01	0.97	0.02	0.01	0.2	1.5e-05	2e-07	-0.43	0.67	0.52	0.02	0.39	0.97	0.82	0.9	0.36
Amino Acid	Histidine Metabolism	Formiminoglutamate	43493	439233	C00439	HMDB00854	LC/MS Pos Early	1880	175.071	1.4274	1	0	0.02	0.93	-0.02	0.01	0.072	-0.02	0.01	0.015	0	0	0.28	-0.01	0	0.0068	-0.02	0.01	0.011	-0.01	0	0.094	-0.02	0.01	0.083	-0.01	0	0.036	1.1e-05	1e-06	-0.11	0.62	0.86	0.5	0.33	0.14	-0.92	0.39	0.021
Amino Acid	Histidine Metabolism	Histidine	59	6274	C00135	HMDB00177	LC/MS Neg	755.9	154.062	0	1	0.1	0.06	0.12	0.06	0.06	0.28	0.04	0.12	0.73	-0.03	0.07	0.71	0.05	0.03	0.18	0.09	0.06	0.11	0.02	0.04	0.69	0.08	0.04	0.073	0	0.06	0.93	3.2e-06	4.2e-08	5.71	2.39	0.018	2.36	1.64	0.15	2.9	4.82	0.55
Amino Acid	Histidine Metabolism	Hydantoin-5-propionic acid	40473	782	C05565	HMDB01212	LC/MS Polar	2080	171.041	8.406	1	-0.02	0.01	0.044	0	0.01	1	-0.01	0.01	0.22	-0.01	0.01	0.022	-0.01	0	0.0091	-0.01	0	0.11	-0.01	0	0.049	-0.01	0.01	0.12	-0.01	0	0.012	0.041	4.8e-06	-0.11	0.47	0.81	0.61	0.33	0.061	-0.15	0.26	0.55
Amino Acid	Histidine Metabolism	Imidazole lactate	15716	440129	C05568	HMDB02320	LC/MS Pos Early	2040	157.061	0	1	-0.01	0.03	0.81	0	0.03	0.99	-0.07	0.03	0.0092	-0.01	0.02	0.52	-0.03	0.01	0.023	-0.06	0.02	0.0019	-0.01	0.02	0.61	0	0.02	0.86	-0.04	0.02	0.027	6.3e-08	9.7e-07	0.75	1.18	0.52	-0.82	0.66	0.21	-1.44	1.17	0.22
Amino Acid	Histidine Metabolism	Imidazole propionate	40730	70630		HMDB02271	LC/MS Pos Early	2263	141.066	0.3965	1	0	0	0.47	-0.01	0.01	0.075	-0.01	0.01	0.39	0	0.01	0.61	-0.01	0	0.039	0	0	0.23	-0.01	0	0.15	-0.01	0	0.11	-0.01	0	0.2	0.02	0.00093	0	0.11	0.98	-0.15	0.15	0.32	-0.49	0.39	0.2
Amino Acid	Histidine Metabolism	N-acetyl-1-methylhistidine*	43255	193270			LC/MS Pos Early	2100	212.103	4.6788	2	-0.01	0.01	0.15	0.02	0.01	0.087	-0.01	0	0.0059	-0.01	0.01	0.22	-0.01	0	0.0013	-0.01	0	0.00058	0	0.01	0.9	0	0.01	0.98	-0.01	0	0.0014	0.0026	0.0028	-0.35	0.37	0.35	0.24	0.33	0.47	-0.26	0.14	0.068
Amino Acid	Histidine Metabolism	N-acetyl-3-methylhistidine*	43256	193270			LC/MS Neg	1360	210.088	44.092	2	-0.01	0.01	0.48	0.04	0.01	8.3e-05	-0.01	0.01	0.08	0	0.01	0.81	0	0	0.94	-0.01	0	0.09	0.01	0.01	0.078	0.01	0.01	0.028	-0.01	0	0.2	2.3e-05	0.41	0.12	0.34	0.73	0.51	0.28	0.069	-0.3	0.27	0.26
Amino Acid	Histidine Metabolism	N-acetylcarnosine	43488	9903482		HMDB12881	LC/MS Polar	2287	267.11	0.2379	1	0	0.03	0.91	0.08	0.03	0.0088	0.01	0.02	0.44	0.02	0.02	0.31	0.02	0.01	0.015	0.01	0.01	0.22	0.03	0.02	0.032	0.04	0.02	0.053	0.02	0.01	0.14	6.4e-06	0.011	0.5	1.21	0.68	4.1	0.87	3.6e-06	0.1	0.66	0.89
Amino Acid	Histidine Metabolism	N-acetylhistamine	48679	69602	C05135	HMDB13253	LC/MS Pos Early	2287	154.097	81.364	1	.	.	.	.	.	.	.	.	.	.	.	.	.	.	.	.	.	.	.	.	.	.	.	.	.	.	.	.	.	.	.	.	.	.	.	.	.	.
Amino Acid	Histidine Metabolism	N-acetylhistidine	33946	75619	C02997	HMDB32055	LC/MS Neg	900	196.073	0.3172	1	-0.05	0.03	0.092	-0.04	0.03	0.2	-0.08	0.03	0.0019	-0.06	0.02	0.014	-0.05	0.01	2.3e-05	-0.06	0.02	0.00043	-0.04	0.02	0.0085	-0.04	0.02	0.024	-0.06	0.02	0.00035	2.4e-06	3.2e-07	-0.88	1.02	0.39	-0.87	0.77	0.26	-1.27	1.09	0.25
Amino Acid	Leucine, Isoleucine and Valine Metabolism	1-carboxyethylisoleucine	47348				LC/MS Neg	2603	202.109	28.073	1	0	0.01	0.78	-0.04	0.01	1.7e-05	-0.01	0.02	0.44	-0.02	0.01	0.18	-0.02	0.01	6.8e-05	-0.01	0.01	0.37	-0.03	0.01	9.8e-05	-0.03	0.01	6.5e-05	-0.02	0.01	0.08	0.028	3.7e-07	-0.46	0.43	0.28	-0.46	0.23	0.049	0.08	0.71	0.91
Amino Acid	Leucine, Isoleucine and Valine Metabolism	1-carboxyethylleucine	47347				LC/MS Neg	2633	202.109	26.8041	1	0	0.01	0.71	-0.04	0.01	0.00047	-0.02	0.02	0.51	-0.02	0.01	0.17	-0.02	0.01	0.00076	0	0.01	0.69	-0.03	0.01	0.00061	-0.02	0.01	0.0042	-0.02	0.01	0.063	0.018	1.2e-06	-0.38	0.5	0.45	-0.51	0.29	0.077	0.03	0.97	0.98
Amino Acid	Leucine, Isoleucine and Valine Metabolism	1-carboxyethylvaline	46643				LC/MS Neg	2011	188.093	13.4021	1	0.01	0.02	0.75	-0.04	0.01	3.3e-05	-0.02	0.02	0.51	-0.02	0.01	0.12	-0.03	0.01	6.5e-05	0	0.01	0.73	-0.03	0.01	3.9e-05	-0.03	0.01	0.00019	-0.02	0.01	0.055	0.008	1.7e-07	-0.67	0.58	0.25	-0.62	0.26	0.018	-0.33	0.9	0.71
Amino Acid	Leucine, Isoleucine and Valine Metabolism	2,3-dihydroxy-2-methylbutyrate	57547	301941		HMDB29576	LC/MS Neg	787	133.051	10.1507	1	-0.01	0.02	0.69	-0.04	0.02	0.0065	-0.05	0.02	0.035	-0.02	0.02	0.23	-0.03	0.01	0.00081	-0.03	0.01	0.028	-0.03	0.01	0.013	-0.03	0.01	0.0086	-0.03	0.01	0.027	2.8e-05	1.1e-07	-1.2	0.79	0.13	-0.77	0.43	0.072	-0.74	0.9	0.41
Amino Acid	Leucine, Isoleucine and Valine Metabolism	2-hydroxy-3-methylvalerate	36746	164623		HMDB00317	LC/MS Neg	1800	131.071	0	1	0	0.01	0.6	-0.01	0.01	0.32	0	0.01	0.53	-0.01	0.01	0.3	-0.01	0	0.057	0	0	0.35	-0.01	0.01	0.12	-0.01	0.01	0.21	-0.01	0	0.23	0.016	0.00024	-0.43	0.32	0.18	-0.01	0.22	0.95	0.07	0.22	0.75
Amino Acid	Leucine, Isoleucine and Valine Metabolism	2-methylbutyrylcarnitine (C5)	45095	6426901		HMDB00378	LC/MS Pos Early	3035	246.17	0.9516	1	-0.03	0.03	0.35	-0.03	0.03	0.34	-0.05	0.03	0.081	-0.02	0.03	0.47	-0.03	0.01	0.021	-0.04	0.02	0.054	-0.02	0.02	0.22	-0.03	0.02	0.12	-0.04	0.02	0.071	5.2e-06	1.1e-08	-1.19	1.03	0.25	0.76	0.71	0.29	-0.09	1.26	0.95
Amino Acid	Leucine, Isoleucine and Valine Metabolism	3-hydroxy-2-ethylpropionate	32397	188979		HMDB00396	LC/MS Neg	975	117.056	0	1	0.04	0.04	0.22	0	0.03	0.99	-0.11	0.03	0.002	0.01	0.03	0.85	-0.02	0.01	0.23	-0.05	0.02	0.024	0	0.02	0.85	0.01	0.02	0.63	-0.04	0.02	0.081	4.2e-08	1.3e-06	-1.04	1.37	0.45	-0.7	0.69	0.32	-0.93	1.48	0.53
Amino Acid	Leucine, Isoleucine and Valine Metabolism	3-hydroxyisobutyrate	1549	87	C06001	HMDB00336	LC/MS Polar	1619	103.04	2.2998	1	0.04	0.02	0.014	0.02	0.01	0.15	-0.05	0.02	0.014	0.02	0.02	0.26	0.01	0.01	0.25	0	0.01	0.77	0.02	0.01	0.071	0.03	0.01	0.013	-0.01	0.01	0.42	1e-06	0.00041	0.26	0.67	0.7	0.25	0.39	0.52	-0.47	0.88	0.59
Amino Acid	Leucine, Isoleucine and Valine Metabolism	3-methyl-2-oxobutyrate	44526	49	C00141	HMDB00019	LC/MS Neg	1465	115.04	0	1	0.06	0.06	0.32	0.08	0.04	0.049	0.12	0.08	0.16	0	0.06	1	0.06	0.03	0.044	0.09	0.05	0.058	0.05	0.03	0.18	0.07	0.03	0.038	0.03	0.05	0.52	3.3e-05	3.5e-07	0.37	2.1	0.86	1.95	1.17	0.096	8.25	3.56	0.022
Amino Acid	Leucine, Isoleucine and Valine Metabolism	3-methyl-2-oxovalerate	15676	47	C00671	HMDB03736	LC/MS Neg	2064.2	129.056	0	1	0.01	0.04	0.85	0.05	0.04	0.19	0.08	0.06	0.19	-0.01	0.05	0.85	0.03	0.02	0.24	0.04	0.04	0.22	0.02	0.03	0.46	0.03	0.03	0.3	0.02	0.04	0.61	8.1e-06	3.3e-06	-1.67	1.45	0.25	1.43	1.04	0.17	7.84	2.64	0.0035
Amino Acid	Leucine, Isoleucine and Valine Metabolism	3-methylglutaconate	57747	1551553		HMDB00522	LC/MS Polar	2700	99.0452	0	1	-0.02	0.02	0.27	0	0.01	0.62	-0.02	0.02	0.4	-0.06	0.02	0.0069	-0.01	0.01	0.1	-0.01	0.01	0.35	-0.01	0.01	0.13	-0.01	0.01	0.36	-0.04	0.02	0.016	3.1e-05	0.0004	-0.97	0.72	0.18	-0.16	0.24	0.51	0.25	1.05	0.81
Amino Acid	Leucine, Isoleucine and Valine Metabolism	3-methylglutarylcarnitine (2)	46548	128145		HMDB00552	LC/MS Pos Early	2675	290.16	1.7446	1	-0.04	0.01	0.0063	-0.01	0.01	0.37	0	0.01	0.8	-0.02	0.01	0.064	-0.01	0	0.054	-0.01	0.01	0.26	-0.01	0.01	0.076	-0.01	0.01	0.053	-0.01	0.01	0.18	0.0026	5.1e-05	-0.27	0.57	0.63	-0.36	0.21	0.088	0	0.51	1
Amino Acid	Leucine, Isoleucine and Valine Metabolism	4-methyl-2-oxopentanoate	22116	70	C00233	HMDB00695	LC/MS Neg	2170	129.056	0	1	0.05	0.05	0.32	0.1	0.04	0.0038	0.12	0.06	0.062	0.01	0.05	0.86	0.06	0.02	0.0042	0.08	0.04	0.024	0.06	0.03	0.041	0.08	0.03	0.0039	0.04	0.04	0.27	2.6e-05	0.00016	-1.01	1.64	0.54	2.31	1	0.021	8.68	2.68	0.0015
Amino Acid	Leucine, Isoleucine and Valine Metabolism	Alpha-hydroxyisocaproate	22132	83697	C03264	HMDB00746	LC/MS Neg	1840	131.071	0	1	-0.02	0.03	0.54	0.02	0.03	0.4	0.04	0.04	0.31	-0.01	0.03	0.71	0	0.02	0.97	0	0.02	0.93	0	0.02	0.99	0.01	0.02	0.77	0	0.02	0.99	5.4e-06	8.8e-07	-1.04	1.12	0.35	1.45	0.79	0.067	1.92	1.57	0.22
Amino Acid	Leucine, Isoleucine and Valine Metabolism	Alpha-hydroxyisovalerate	33937	99823		HMDB00407	LC/MS Neg	1126	117.056	0	1	0	0.01	0.92	0	0.01	0.66	0	0	0.49	0	0	0.36	0	0	0.12	0	0	0.41	0	0	0.25	0	0	0.58	0	0	0.22	0.026	0.0094	-0.25	0.21	0.22	-0.11	0.16	0.52	0.06	0.16	0.69
Amino Acid	Leucine, Isoleucine and Valine Metabolism	Beta-hydroxyisovalerate	12129	69362		HMDB00754	LC/MS Neg	1027	117.056	0	1	0	0.03	0.9	0.03	0.03	0.25	-0.01	0.02	0.57	0.01	0.03	0.74	0	0.01	0.84	-0.01	0.02	0.63	0.02	0.02	0.37	0.01	0.02	0.63	0	0.02	0.92	1.7e-06	3.3e-06	-1.27	0.95	0.18	0.44	0.82	0.59	1.49	0.99	0.13
Amino Acid	Leucine, Isoleucine and Valine Metabolism	Ethylmalonate	15765	11756		HMDB00622	LC/MS Polar	2785	131.035	0.793	1	0.03	0.03	0.3	-0.02	0.01	0.11	-0.05	0.04	0.29	-0.04	0.01	0.01	-0.02	0.01	0.0072	0	0.02	0.92	-0.02	0.01	0.0049	-0.01	0.01	0.21	-0.04	0.01	0.0043	2.7e-05	0.00011	-1.07	1.09	0.33	-0.27	0.25	0.28	-0.24	1.78	0.89
Amino Acid	Leucine, Isoleucine and Valine Metabolism	Isobutyrylcarnitine (C4)	33441	168379		HMDB00736	LC/MS Pos Early	2810	232.154	0.0793	1	-0.01	0.01	0.53	0	0.01	0.79	-0.02	0.02	0.19	0	0.01	0.89	0	0.01	0.55	-0.01	0.01	0.22	0	0.01	0.97	0	0.01	0.85	-0.01	0.01	0.45	4.9e-06	2e-05	-0.29	0.39	0.45	0.1	0.35	0.78	0.14	0.78	0.86
Amino Acid	Leucine, Isoleucine and Valine Metabolism	Isobutyrylglycine	35437	10855600		HMDB00730	LC/MS Neg	1420	144.067	45.0436	1	-0.02	0.02	0.39	0.03	0.02	0.064	0	0.02	0.98	-0.01	0.02	0.67	0.01	0.01	0.42	0	0.01	0.73	0.01	0.01	0.34	0.01	0.01	0.28	0	0.01	0.85	7.4e-05	0.00084	-0.03	0.75	0.97	-0.04	0.44	0.93	-0.44	0.97	0.65
Amino Acid	Leucine, Isoleucine and Valine Metabolism	Isoleucine	1125	6306	C00407	HMDB00172	LC/MS Pos Early	2800	132.102	0	1	-0.02	0.06	0.69	-0.05	0.05	0.36	0.05	0.09	0.59	0	0.07	0.99	-0.01	0.03	0.65	0.02	0.05	0.7	-0.03	0.04	0.55	-0.05	0.04	0.26	0.02	0.06	0.73	3.1e-06	1.2e-08	-2.24	2.22	0.31	0.58	1.54	0.71	6.01	3.72	0.11
Amino Acid	Leucine, Isoleucine and Valine Metabolism	Isovalerate (i5:0)	44656	10430	C08262	HMDB00718	LC/MS Neg	1564	101.061	0	1	0.07	0.03	0.036	0.1	0.03	5.1e-05	0.04	0.04	0.32	0.07	0.03	0.018	0.07	0.01	6.5e-07	0.06	0.02	0.027	0.08	0.02	6.3e-06	0.09	0.02	5.6e-06	0.06	0.02	0.016	2.7e-07	0.0012	-1.02	1.21	0.4	0.96	0.73	0.19	1.6	1.73	0.36
Amino Acid	Leucine, Isoleucine and Valine Metabolism	Isovalerylcarnitine (C5)	34407	6426851		HMDB00688	LC/MS Pos Early	3085	246.17	0	1	0.07	0.03	0.023	0.04	0.02	0.054	0	0.03	0.98	0.05	0.03	0.062	0.03	0.01	0.0083	0.02	0.02	0.21	0.04	0.02	0.0071	0.05	0.02	0.008	0.02	0.02	0.3	1.3e-06	0.00027	1.53	1.09	0.16	1.26	0.65	0.052	1.04	1.11	0.35
Amino Acid	Leucine, Isoleucine and Valine Metabolism	Isovalerylglycine	35107	546304		HMDB00678	LC/MS Neg	1950	158.082	22.9976	1	0	0.02	0.97	0.01	0.01	0.56	0	0.01	0.73	-0.01	0.02	0.63	0	0.01	0.9	0	0.01	0.96	0	0.01	0.94	0	0.01	0.69	0	0.01	0.75	0.00081	0.00016	-0.32	0.69	0.64	-0.02	0.41	0.97	-0.28	0.44	0.52
Amino Acid	Leucine, Isoleucine and Valine Metabolism	Leucine	60	6106	C00123	HMDB00687	LC/MS Pos Early	2864	132.102	0	1	0.02	0.06	0.75	0.02	0.06	0.78	0.12	0.09	0.19	0.09	0.07	0.22	0.05	0.03	0.11	0.08	0.05	0.14	0.05	0.04	0.29	0.01	0.04	0.78	0.1	0.06	0.07	5.5e-06	8e-07	-1.77	2.4	0.46	2.88	1.6	0.072	9.12	3.83	0.019
Amino Acid	Leucine, Isoleucine and Valine Metabolism	Methylsuccinate	15745	10349		HMDB01844	LC/MS Polar	2800	131.035	2.3791	1	0.06	0.03	0.098	-0.02	0.02	0.43	0	0.01	0.84	-0.06	0.02	0.01	0	0.01	0.64	0.01	0.01	0.34	-0.04	0.02	0.018	0	0.02	0.91	-0.01	0.01	0.4	0.0089	7.8e-07	0.32	1.36	0.82	-1.01	0.61	0.097	0.09	0.55	0.87
Amino Acid	Leucine, Isoleucine and Valine Metabolism	N-acetylisoleucine	33967	2802421		HMDB61684	LC/MS Neg	2325	172.098	23.3148	1	-0.03	0.02	0.21	-0.07	0.02	0.001	-0.05	0.03	0.12	-0.03	0.02	0.14	-0.04	0.01	6.6e-05	-0.04	0.02	0.022	-0.04	0.01	0.0024	-0.05	0.02	0.00043	-0.03	0.02	0.027	4.4e-05	8.9e-09	-1.9	0.79	0.018	-1.33	0.57	0.021	-0.21	1.27	0.87
Amino Acid	Leucine, Isoleucine and Valine Metabolism	N-acetylleucine	1587	70912	C02710	HMDB11756	LC/MS Neg	2400	172.098	6.027	1	0.01	0.02	0.75	-0.05	0.03	0.065	-0.07	0.03	0.029	-0.03	0.02	0.21	-0.03	0.01	0.0076	-0.02	0.02	0.16	-0.03	0.02	0.04	-0.02	0.02	0.2	-0.04	0.02	0.022	0.0001	5e-07	-1.16	0.78	0.14	-0.32	0.72	0.65	-0.3	1.38	0.83
Amino Acid	Leucine, Isoleucine and Valine Metabolism	N-acetylvaline	1591	66789		HMDB11757	LC/MS Neg	1704	158.082	0.0793	1	.	.	.	.	.	.	.	.	.	.	.	.	.	.	.	.	.	.	.	.	.	.	.	.	.	.	.	.	.	.	.	.	.	.	.	.	.	.
Amino Acid	Leucine, Isoleucine and Valine Metabolism	N-carbamoylvaline	52835				LC/MS Neg	1283	159.077	39.1753	1	-0.06	0.02	0.013	-0.01	0.02	0.49	-0.02	0.01	0.028	-0.02	0.01	0.066	-0.02	0	0.0012	-0.02	0.01	0.0033	-0.01	0.01	0.099	-0.03	0.01	0.049	-0.02	0.01	0.0025	0.0025	7.2e-07	-2.22	0.89	0.013	-0.02	0.49	0.96	-0.53	0.37	0.15
Amino Acid	Leucine, Isoleucine and Valine Metabolism	Tiglylcarnitine (C5:1-DC)	35428	22833596		HMDB02366	LC/MS Pos Early	2962	244.154	0.8723	1	0.01	0.03	0.72	0.07	0.02	0.00074	-0.05	0.04	0.2	0.07	0.02	0.0067	0.04	0.01	0.0014	-0.02	0.02	0.45	0.07	0.02	2.6e-05	0.05	0.02	0.0032	0.03	0.02	0.1	3.4e-09	0.00015	-0.38	1.13	0.74	2.08	0.61	0.00074	-0.47	1.51	0.76
Amino Acid	Leucine, Isoleucine and Valine Metabolism	Valine	1649	6287	C00183	HMDB00883	LC/MS Neg	909.4	116.072	0	1	0.01	0.06	0.82	0.06	0.05	0.19	0.21	0.1	0.029	0.04	0.06	0.45	0.06	0.03	0.041	0.1	0.05	0.051	0.05	0.04	0.18	0.04	0.04	0.28	0.09	0.05	0.086	2.1e-05	3.6e-07	-1.76	2.21	0.43	2.21	1.38	0.11	8.78	4.07	0.033
Amino Acid	Lysine Metabolism	2-aminoadipate	6146	469	C00956	HMDB00510	LC/MS Neg	639.2	160.062	0.0793	1	0.04	0.03	0.27	0	0.03	0.95	0.01	0.03	0.66	0.01	0.03	0.65	0.01	0.01	0.32	0.03	0.02	0.19	0.01	0.02	0.65	0.01	0.02	0.56	0.01	0.02	0.6	2.8e-05	3.8e-06	-0.17	1.24	0.89	1.72	0.74	0.021	2.49	1.31	0.06
Amino Acid	Lysine Metabolism	5-(galactosylhydroxy)-L-lysine	43582				LC/MS Pos Early	2755	325.161	0.3172	1	-0.09	0.04	0.015	-0.11	0.04	0.0031	-0.05	0.03	0.073	-0.06	0.02	0.0055	-0.06	0.01	1.5e-05	-0.05	0.02	0.014	-0.07	0.02	0.00032	-0.1	0.03	0.00013	-0.06	0.02	0.0012	0.00047	3.1e-10	-1.8	1.41	0.21	-1.46	0.99	0.14	-1.57	1.18	0.19
Amino Acid	Lysine Metabolism	5-hydroxylysine	15685	1029	C16741	HMDB00450	LC/MS Pos Early	2790	163.108	16.4155	1	-0.03	0.02	0.15	-0.03	0.01	0.017	-0.02	0.02	0.19	0	0	0.47	0	0	0.12	-0.03	0.01	0.023	0	0	0.27	-0.03	0.01	0.0035	0	0	0.32	5.3e-06	2.7e-09	-1.46	0.69	0.035	0.32	0.36	0.38	-0.99	0.68	0.15
Amino Acid	Lysine Metabolism	6-oxopiperidine-2-carboxylate	43231	3014237		HMDB61705	LC/MS Neg	965	142.051	0.9516	1	0.01	0.02	0.8	-0.04	0.02	0.03	-0.05	0.03	0.069	0	0.03	0.93	-0.02	0.01	0.031	-0.02	0.02	0.19	-0.02	0.02	0.14	-0.02	0.01	0.12	-0.03	0.02	0.09	8.1e-05	3e-07	-0.12	0.72	0.87	-0.41	0.55	0.45	-0.86	1.05	0.41
Amino Acid	Lysine Metabolism	Glutarylcarnitine (C5-DC)	44664	71464488		HMDB13130	LC/MS Pos Early	2393	276.144	0	1	0.03	0.03	0.22	0.03	0.02	0.09	0.01	0.03	0.78	-0.03	0.03	0.25	0.01	0.01	0.52	0.01	0.02	0.45	0.01	0.02	0.74	0.03	0.02	0.051	-0.02	0.02	0.34	1.4e-05	7.4e-05	0.93	1.02	0.36	0.2	0.59	0.73	-0.28	1.21	0.82
Amino Acid	Lysine Metabolism	Lysine	1301	5962	C00047	HMDB00182	LC/MS Pos Early	2850	147.113	0	1	0.04	0.07	0.6	0.07	0.06	0.27	0.11	0.12	0.4	0.05	0.09	0.57	0.06	0.04	0.13	0.06	0.06	0.3	0.06	0.05	0.26	0.05	0.05	0.24	0.07	0.07	0.36	2e-05	5e-09	4.2	2.58	0.1	5.99	1.66	0.00035	0.34	5.25	0.95
Amino Acid	Lysine Metabolism	N2-acetyl,N6-methyllysine	46684				LC/MS Pos Early	2190	203.139	8.8025	1	-0.01	0.01	0.38	0.01	0.01	0.13	-0.01	0.02	0.71	0	0.01	0.8	0	0	0.48	-0.01	0.01	0.3	0.01	0	0.21	0	0	0.36	0	0.01	0.97	9.6e-06	0.0017	-0.11	0.32	0.73	0.05	0.15	0.73	0	0.76	1
Amino Acid	Lysine Metabolism	N2-acetyllysine	36751	92907	C12989	HMDB00446	LC/MS Polar	3372.6	187.109	57.0975	1	0	0.01	0.85	0.03	0.01	0.0077	-0.02	0.02	0.44	0	0.02	0.83	0.01	0.01	0.4	-0.01	0.01	0.45	0.02	0.01	0.077	0.02	0.01	0.032	-0.01	0.01	0.33	7e-08	2.9e-05	0.03	0.51	0.96	0.3	0.35	0.39	-0.06	0.89	0.95
Amino Acid	Lysine Metabolism	N6,N6,N6-trimethyllysine	1498	440120	C03793	HMDB01325	LC/MS Pos Early	2825	189.16	0	1	0	0.02	0.89	0.01	0.01	0.37	-0.01	0.02	0.72	0.02	0.02	0.19	0.01	0.01	0.22	0	0.01	0.9	0.02	0.01	0.1	0.01	0.01	0.46	0.01	0.01	0.37	1.1e-06	3e-06	-0.05	0.6	0.93	0.43	0.39	0.28	1.14	1.01	0.26
Amino Acid	Lysine Metabolism	N6-acetyllysine	36752	92832	C02727	HMDB00206	LC/MS Neg	1059	187.109	0	1	-0.05	0.05	0.27	-0.11	0.04	0.0068	-0.08	0.06	0.18	-0.05	0.03	0.083	-0.06	0.02	0.00094	-0.07	0.04	0.062	-0.06	0.02	0.0066	-0.09	0.03	0.0054	-0.06	0.03	0.027	1.3e-06	5.6e-09	-0.95	1.4	0.5	-2.8	1.14	0.014	-2.39	2.56	0.35
Amino Acid	Lysine Metabolism	N-acetyl-cadaverine	43530	189087		HMDB02284	LC/MS Pos Early	2385	145.134	47.3434	1	0	0	0.67	-0.01	0	0.047	0.01	0.01	0.19	0	0.01	0.72	0	0	0.82	0.01	0	0.19	0	0	0.23	0	0	0.18	0.01	0.01	0.32	0.64	0.00015	-0.04	0.18	0.82	0	0.12	0.99	0.56	0.33	0.091
Amino Acid	Lysine Metabolism	N-trimethyl 5-aminovalerate	57687				LC/MS Pos Early	2186	160.133	0	1	0.01	0.03	0.68	-0.03	0.02	0.052	-0.07	0.04	0.09	-0.02	0.03	0.35	-0.03	0.01	0.017	-0.03	0.02	0.25	-0.03	0.01	0.053	-0.03	0.01	0.09	-0.04	0.02	0.055	1.6e-06	4e-07	-1.32	1.27	0.3	-0.47	0.48	0.33	-1.62	1.61	0.32
Amino Acid	Lysine Metabolism	Pipecolate	1444	849	C00408	HMDB00070	LC/MS Pos Early	2200	130.086	0	1	0	0.01	0.99	0	0.01	0.59	0	0.01	0.57	0	0.01	0.85	0	0	0.65	0	0	0.5	0	0	0.88	0	0	0.67	0	0	0.47	0.00051	0.011	-0.21	0.19	0.28	-0.13	0.17	0.43	-0.08	0.22	0.73
Amino Acid	Methionine, Cysteine, SAM and Taurine Metabolism	2,3-dihydroxy-5-methylthio-4-pentenoate (DMTPA)*	46260				LC/MS Neg	1157.1	177.023	0	2	-0.12	0.05	0.027	-0.22	0.05	1.7e-05	-0.03	0.02	0.12	-0.06	0.02	0.0023	-0.04	0.01	8.8e-05	-0.03	0.01	0.082	-0.06	0.02	0.0001	-0.18	0.04	1.3e-06	-0.04	0.01	0.0018	0.0025	4.3e-13	-5.69	2	0.0049	-2.95	1.24	0.018	-0.91	0.77	0.24
Amino Acid	Methionine, Cysteine, SAM and Taurine Metabolism	5-methylthioribose**	47716				LC/MS Pos Early	810	181.053	0	3	0.05	0.07	0.43	-0.07	0.06	0.23	-0.03	0.04	0.57	-0.18	0.06	0.0014	-0.05	0.03	0.03	0	0.03	0.94	-0.13	0.04	0.0012	-0.02	0.04	0.65	-0.09	0.03	0.014	0.00044	1.9e-08	1.64	2.41	0.5	-0.07	1.64	0.97	-1.27	1.85	0.49
Amino Acid	Methionine, Cysteine, SAM and Taurine Metabolism	Alpha-ketobutyrate	4968	58	C00109	HMDB00005	LC/MS Polar	940	101.024	5.7891	1	0.01	0.02	0.46	0.03	0.01	0.022	0	0.03	0.99	0.02	0.02	0.26	0.02	0.01	0.027	0.01	0.01	0.45	0.03	0.01	0.019	0.02	0.01	0.037	0.01	0.01	0.37	7.6e-05	5.1e-06	-0.01	0.63	0.99	0.86	0.39	0.026	1.08	1.11	0.33
Amino Acid	Methionine, Cysteine, SAM and Taurine Metabolism	Cystathionine	15705	439258	C02291	HMDB00099	LC/MS Pos Early	2270	223.075	5.4718	1	-0.03	0.01	0.013	-0.01	0.01	0.14	-0.03	0.01	0.041	-0.01	0.01	0.14	-0.02	0.01	0.00036	-0.03	0.01	0.0021	-0.01	0.01	0.031	-0.02	0.01	0.0062	-0.02	0.01	0.018	3.2e-05	4.3e-06	-0.69	0.4	0.087	0.11	0.21	0.59	-0.46	0.52	0.38
Amino Acid	Methionine, Cysteine, SAM and Taurine Metabolism	Cysteine	1868	5862	C00097	HMDB00574	LC/MS Pos Early	1488	122.027	0	1	-0.01	0.04	0.76	0.04	0.03	0.17	0	0.05	0.95	0.04	0.03	0.21	0.03	0.02	0.077	0.01	0.03	0.75	0.04	0.02	0.059	0.02	0.02	0.34	0.03	0.03	0.24	5.9e-06	8.8e-08	2.01	1.33	0.13	0.28	0.69	0.69	-0.29	2.21	0.9
Amino Acid	Methionine, Cysteine, SAM and Taurine Metabolism	Cysteine s-sulfate	22176	115015	C05824	HMDB00731	LC/MS Pos Early	565	201.984	0	1	.	.	.	.	.	.	.	.	.	.	.	.	.	.	.	.	.	.	.	.	.	.	.	.	.	.	.	.	.	.	.	.	.	.	.	.	.	.
Amino Acid	Methionine, Cysteine, SAM and Taurine Metabolism	Cysteine sulfinic acid	37443	109	C00606	HMDB00996	LC/MS Pos Early	597	154.017	0	1	-0.01	0.02	0.68	-0.08	0.02	0.00061	0.01	0.05	0.79	-0.04	0.03	0.19	-0.04	0.01	0.002	0	0.02	0.85	-0.06	0.02	0.0014	-0.05	0.02	0.0023	-0.03	0.02	0.2	7e-05	2.7e-08	0.49	0.86	0.57	-0.99	0.68	0.15	3.09	2.04	0.13
Amino Acid	Methionine, Cysteine, SAM and Taurine Metabolism	Cystine	56	67678	C00491	HMDB00192	LC/MS Pos Early	2000	241.031	0	1	-0.01	0.05	0.82	-0.04	0.04	0.37	-0.11	0.1	0.26	-0.17	0.06	0.0033	-0.08	0.03	0.006	-0.04	0.05	0.45	-0.09	0.03	0.0078	-0.03	0.03	0.3	-0.15	0.05	0.0017	2.6e-06	2.3e-08	-1.05	1.92	0.59	0.56	1.19	0.64	-7.27	3.82	0.059
Amino Acid	Methionine, Cysteine, SAM and Taurine Metabolism	Hypotaurine	590	107812	C00519	HMDB00965	LC/MS Pos Early	724	110.027	0	1	0.04	0.03	0.18	0.01	0.02	0.62	-0.04	0.04	0.34	-0.04	0.03	0.15	-0.01	0.01	0.49	0	0.02	1	-0.01	0.02	0.45	0.02	0.02	0.3	-0.04	0.02	0.095	9e-06	2.7e-05	1.5	1.01	0.14	0.88	0.59	0.14	1.4	1.56	0.37
Amino Acid	Methionine, Cysteine, SAM and Taurine Metabolism	Methionine	1302	6137	C00073	HMDB00696	LC/MS Neg	1147	148.044	0	1	0.05	0.06	0.36	0.05	0.05	0.37	-0.06	0.06	0.26	-0.04	0.05	0.47	-0.01	0.03	0.67	-0.02	0.04	0.68	-0.01	0.04	0.83	0.05	0.04	0.2	-0.05	0.04	0.23	1.7e-06	4.1e-07	2.2	2.05	0.28	5.38	1.37	0.0001	-2.42	1.88	0.2
Amino Acid	Methionine, Cysteine, SAM and Taurine Metabolism	Methionine sulfone	44878	69961			LC/MS Pos Early	1250	182.048	0	1	-0.04	0.03	0.18	-0.05	0.02	0.0033	-0.03	0.03	0.34	0.02	0.03	0.41	-0.03	0.01	0.0067	-0.04	0.02	0.046	-0.02	0.01	0.08	-0.05	0.01	0.00061	-0.01	0.02	0.74	1.8e-06	1.6e-08	-1.9	1.06	0.076	-1.67	0.45	0.00022	-1.69	1.13	0.14
Amino Acid	Methionine, Cysteine, SAM and Taurine Metabolism	Methionine sulfoxide	18374	158980	C02989	HMDB02005	LC/MS Pos Early	1272	166.053	0	1	0.04	0.03	0.28	-0.03	0.02	0.22	-0.08	0.02	0.0011	-0.05	0.02	0.04	-0.05	0.01	0.00021	-0.05	0.02	0.004	-0.04	0.02	0.015	-0.01	0.02	0.66	-0.07	0.02	9.3e-05	1.8e-05	2.3e-06	-0.4	1.29	0.76	1.15	0.62	0.066	-2.17	1.03	0.037
Amino Acid	Methionine, Cysteine, SAM and Taurine Metabolism	N-acetylmethionine	1589	448580	C02712	HMDB11745	LC/MS Neg	1787	190.054	0.1586	1	-0.04	0.04	0.25	-0.08	0.04	0.021	-0.05	0.03	0.057	-0.09	0.03	0.0048	-0.06	0.02	0.00019	-0.04	0.02	0.039	-0.07	0.02	0.0011	-0.07	0.03	0.012	-0.07	0.02	0.0011	0.00072	3.4e-08	-1.66	1.35	0.22	-1.03	0.95	0.28	-1.06	1.24	0.39
Amino Acid	Methionine, Cysteine, SAM and Taurine Metabolism	N-acetyltaurine	48187	159864			LC/MS Neg	800	166.018	0	1	-0.01	0.01	0.49	-0.04	0.02	0.0075	-0.01	0.02	0.53	-0.03	0.02	0.1	-0.02	0.01	0.0025	-0.01	0.01	0.17	-0.04	0.01	0.0034	-0.02	0.01	0.027	-0.02	0.01	0.06	0.004	6e-06	-0.81	0.38	0.034	-0.54	0.44	0.22	-0.3	0.71	0.67
Amino Acid	Methionine, Cysteine, SAM and Taurine Metabolism	N-formylmethionine	2829	439750	C03145	HMDB01015	LC/MS Neg	1543.8	176.039	0	1	-0.08	0.06	0.16	-0.18	0.05	0.00056	-0.13	0.05	0.017	-0.18	0.05	0.00059	-0.14	0.03	6.4e-08	-0.11	0.04	0.0034	-0.17	0.04	3e-06	-0.14	0.04	0.00042	-0.16	0.04	2.3e-05	4.9e-05	3.8e-09	-1.71	2.09	0.42	-2.74	1.34	0.042	-2.38	2.29	0.3
Amino Acid	Methionine, Cysteine, SAM and Taurine Metabolism	N-methyltaurine	42989	7882			LC/MS Polar	1650	138.023	64.0761	1	-0.01	0.02	0.73	0.04	0.01	0.0016	0.01	0.02	0.57	0.01	0.02	0.39	0.02	0.01	0.0077	0	0.01	0.87	0.03	0.01	0.0048	0.02	0.01	0.012	0.02	0.01	0.26	1.4e-07	2e-06	-0.86	0.6	0.16	0.33	0.34	0.33	-0.03	0.97	0.98
Amino Acid	Methionine, Cysteine, SAM and Taurine Metabolism	S-adenosylhomocysteine (SAH)	42382	439155	C00021	HMDB00939	LC/MS Neg	1832.4	383.114	24.9009	1	-0.05	0.03	0.1	-0.12	0.02	3.2e-06	-0.02	0.01	0.1	-0.04	0.01	0.00021	-0.03	0.01	1.4e-05	-0.01	0.01	0.078	-0.04	0.01	2.6e-06	-0.09	0.02	3.8e-06	-0.03	0.01	0.00037	0.64	9.9e-13	-1.45	1.08	0.18	-0.91	0.67	0.18	-0.37	0.4	0.35
Amino Acid	Methionine, Cysteine, SAM and Taurine Metabolism	S-methylcysteine	39592	24417		HMDB02108	LC/MS Neg	880	134.028	0	1	-0.01	0.01	0.71	0.01	0.01	0.31	0	0.02	0.86	0.01	0.02	0.53	0.01	0.01	0.5	0	0.01	0.76	0.01	0.01	0.28	0.01	0.01	0.49	0.01	0.01	0.57	2.5e-06	5.4e-06	-0.41	0.54	0.44	-0.3	0.4	0.46	0.22	0.73	0.76
Amino Acid	Methionine, Cysteine, SAM and Taurine Metabolism	S-methylcysteine sulfoxide	43378	82142		HMDB29432	LC/MS Pos Early	900	152.038	0	1	0	0.02	0.76	0.02	0.01	0.072	0.01	0.03	0.81	0.02	0.02	0.22	0.01	0.01	0.061	0	0.01	0.83	0.02	0.01	0.041	0.01	0.01	0.1	0.02	0.02	0.2	6.7e-07	1.4e-06	-0.21	0.59	0.72	-0.16	0.26	0.55	0.4	1.07	0.71
Amino Acid	Methionine, Cysteine, SAM and Taurine Metabolism	S-methylmethionine	38127	458	C05319	HMDB38670	LC/MS Pos Early	2555	164.074	62.9659	1	-0.02	0.01	0.25	0.05	0.01	4e-05	0.01	0.03	0.57	0.01	0.02	0.5	0.02	0.01	0.012	-0.01	0.01	0.45	0.03	0.01	0.00098	0.03	0.01	0.006	0.01	0.01	0.41	1.9e-08	4.7e-06	-0.58	0.56	0.3	-0.05	0.35	0.87	0.61	1.06	0.56
Amino Acid	Methionine, Cysteine, SAM and Taurine Metabolism	Taurine	2125	1123	C00245	HMDB00251	LC/MS Neg	690	124.007	0	1	0.01	0.04	0.82	0.07	0.04	0.071	-0.11	0.07	0.11	0.06	0.05	0.26	0.03	0.02	0.25	-0.02	0.03	0.58	0.06	0.03	0.04	0.04	0.03	0.17	0.01	0.04	0.87	1.3e-07	4.6e-08	2.06	1.41	0.14	0.81	1.01	0.42	-3.34	2.81	0.24
Amino Acid	Phenylalanine Metabolism	1-carboxyethylphenylalanine	46473				LC/MS Neg	2843	236.093	0.0793	1	-0.01	0.02	0.63	-0.05	0.01	1.9e-06	-0.04	0.03	0.17	-0.04	0.01	0.013	-0.04	0.01	2.4e-08	-0.02	0.01	0.093	-0.05	0.01	3.2e-07	-0.04	0.01	5.9e-06	-0.04	0.01	0.00082	0.00029	7.8e-08	-0.3	0.64	0.64	-0.63	0.3	0.035	-1.26	1.04	0.23
Amino Acid	Phenylalanine Metabolism	4-hydroxyphenylacetate	541	127	C00642	HMDB00020	LC/MS Neg	1361	151.04	9.3577	1	-0.01	0.01	0.19	-0.01	0.01	0.45	-0.01	0.01	0.18	0	0.01	0.69	-0.01	0	0.067	-0.01	0.01	0.09	0	0.01	0.53	-0.01	0.01	0.12	-0.01	0.01	0.19	9.5e-05	7e-05	-0.43	0.37	0.24	-0.11	0.2	0.58	-0.35	0.44	0.43
Amino Acid	Phenylalanine Metabolism	N-acetylphenylalanine	33950	74839	C03519	HMDB00512	LC/MS Neg	2597	206.082	0.2379	1	0	0.01	0.87	-0.03	0.02	0.15	-0.03	0.01	0.028	-0.05	0.02	0.006	-0.03	0.01	0.00055	-0.02	0.01	0.094	-0.04	0.01	0.0017	-0.01	0.01	0.37	-0.04	0.01	0.00038	0.007	2.9e-05	-0.29	0.48	0.55	-0.02	0.56	0.98	-0.52	0.62	0.4
Amino Acid	Phenylalanine Metabolism	Phenylacetate	57745	999	C07086	HMDB00209	LC/MS Neg	2150	91.0554	2.1412	1	0	0.01	0.43	-0.01	0.01	0.2	-0.01	0.01	0.28	-0.01	0.01	0.52	-0.01	0	0.086	-0.01	0.01	0.34	-0.01	0.01	0.16	-0.01	0	0.16	-0.01	0.01	0.19	0.0077	0.0015	-0.27	0.16	0.097	-0.42	0.26	0.11	0.29	0.54	0.59
Amino Acid	Phenylalanine Metabolism	Phenylalanine	64	6140	C00079	HMDB00159	LC/MS Pos Early	2878	166.086	0	1	-0.03	0.09	0.76	-0.06	0.08	0.43	-0.17	0.12	0.15	-0.15	0.08	0.061	-0.11	0.04	0.0082	-0.1	0.07	0.18	-0.12	0.05	0.027	-0.05	0.06	0.44	-0.17	0.07	0.011	2.8e-07	2.7e-09	4.48	3.36	0.18	5.99	2.21	0.007	-1.29	4.83	0.79
Amino Acid	Phenylalanine Metabolism	Phenyllactate (PLA)	22130	3848	C05607	HMDB00779	LC/MS Neg	2208	165.056	0.3172	1	-0.03	0.02	0.22	-0.02	0.01	0.29	-0.05	0.02	0.041	-0.01	0.01	0.57	-0.02	0.01	0.013	-0.04	0.01	0.005	-0.01	0.01	0.24	-0.02	0.01	0.15	-0.02	0.01	0.095	4.2e-07	8e-07	0.04	0.74	0.96	0.38	0.3	0.21	-1.58	0.86	0.067
Amino Acid	Phenylalanine Metabolism	Phenylpyruvate	566	997	C00166	HMDB00205	LC/MS Neg	2515	163.04	9.0404	1	0	0.02	0.99	-0.02	0.02	0.33	-0.01	0.03	0.79	-0.05	0.03	0.084	-0.02	0.01	0.13	0	0.02	0.96	-0.03	0.02	0.061	-0.01	0.02	0.49	-0.03	0.02	0.12	0.00011	1.2e-06	0.12	0.96	0.9	1.02	0.57	0.072	1	1.32	0.45
Amino Acid	Polyamine Metabolism	(N(1) + N(8))-acetylspermidine	57814				LC/MS Pos Early	3080	188.176	0	1	-0.05	0.03	0.08	-0.01	0.02	0.71	-0.06	0.04	0.12	-0.07	0.03	0.034	-0.04	0.01	0.0024	-0.07	0.02	0.0047	-0.03	0.02	0.098	-0.02	0.02	0.24	-0.07	0.02	0.003	3.2e-07	1.1e-06	-0.55	1.13	0.63	-0.22	0.64	0.73	-0.88	1.75	0.62
Amino Acid	Polyamine Metabolism	4-acetamidobutanoate	1558	18189	C02946	HMDB03681	LC/MS Pos Early	1350	146.081	0	1	-0.07	0.04	0.073	-0.08	0.03	0.0058	-0.01	0.01	0.24	-0.06	0.02	0.005	-0.02	0.01	0.0087	-0.01	0.01	0.22	-0.06	0.02	0.00044	-0.08	0.02	0.00039	-0.02	0.01	0.04	0.034	1e-10	-0.69	1.45	0.63	-2.03	0.83	0.015	-0.29	0.41	0.48
Amino Acid	Polyamine Metabolism	5-methylthioadenosine (MTA)	1419	439176	C00170	HMDB01173	LC/MS Pos Early	2752	298.097	0	1	-0.07	0.05	0.2	-0.13	0.04	0.00052	-0.14	0.04	0.0011	-0.08	0.04	0.039	-0.11	0.02	1.3e-07	-0.12	0.03	0.00023	-0.1	0.03	0.00028	-0.11	0.03	0.00018	-0.12	0.03	9.8e-05	5.8e-08	1.4e-09	-5.03	1.9	0.0086	-1.34	0.99	0.18	-4.93	1.77	0.006
Amino Acid	Polyamine Metabolism	Acisoga	43258	129397			LC/MS Neg	2297	183.114	4.0444	1	-0.04	0.02	0.034	-0.01	0.01	0.45	-0.05	0.02	0.012	-0.05	0.02	0.0093	-0.04	0.01	1.1e-05	-0.05	0.01	0.00012	-0.03	0.01	0.027	-0.02	0.01	0.059	-0.06	0.01	4e-05	9.3e-06	0.00016	-2.61	0.64	6.6e-05	-0.41	0.35	0.25	-0.59	0.78	0.45
Amino Acid	Polyamine Metabolism	N-acetyl-isoputreanine*	47718				LC/MS Pos Early	2300	203.139	0.0793	2	-0.04	0.02	0.12	-0.04	0.02	0.076	-0.08	0.03	0.0024	-0.05	0.02	0.0062	-0.05	0.01	1.5e-06	-0.06	0.02	0.00031	-0.04	0.01	0.0013	-0.04	0.01	0.018	-0.06	0.01	3.1e-05	6.5e-06	1.3e-05	-1.7	0.86	0.049	-0.88	0.49	0.074	-1.79	1.09	0.1
Amino Acid	Polyamine Metabolism	N-acetylputrescine	37496	122356	C02714	HMDB02064	LC/MS Pos Early	2230	131.118	0	1	-0.03	0.03	0.35	-0.09	0.03	0.00042	-0.08	0.04	0.019	-0.05	0.03	0.12	-0.07	0.01	2e-06	-0.06	0.02	0.006	-0.07	0.02	0.00037	-0.06	0.02	0.00066	-0.08	0.02	0.0018	1.5e-05	1.1e-06	0.27	1.03	0.79	-0.78	0.74	0.29	-2.7	1.48	0.07
Amino Acid	Polyamine Metabolism	Spermidine	485	1102	C00315	HMDB01257	LC/MS Pos Early	3355	146.165	43.3783	1	0.02	0.02	0.14	0	0.01	0.82	0.02	0.02	0.26	0	0.02	0.87	0.01	0.01	0.31	0.02	0.01	0.086	0	0.01	1	0.01	0.01	0.31	0.01	0.01	0.54	0.014	0.00026	1.03	0.62	0.1	0.49	0.39	0.21	0.06	0.88	0.94
Amino Acid	Tryptophan Metabolism	3-indoxyl sulfate	27672	10258		HMDB00682	LC/MS Neg	2222.2	212.002	0	1	-0.03	0.03	0.31	-0.03	0.02	0.094	0	0.02	0.94	-0.04	0.02	0.043	-0.02	0.01	0.099	0	0.01	0.87	-0.04	0.01	0.011	-0.03	0.02	0.03	-0.01	0.01	0.32	0.0025	2.7e-08	-1.48	1.01	0.14	0.2	0.52	0.71	0.54	0.72	0.45
Amino Acid	Tryptophan Metabolism	5-bromotryptophan	53242	96735			LC/MS Neg	3525	280.993	0	1	0	0.04	0.96	0.05	0.03	0.11	0.04	0.06	0.48	0.03	0.04	0.47	0.03	0.02	0.081	0.02	0.03	0.62	0.04	0.02	0.1	0.03	0.02	0.16	0.04	0.03	0.27	2.1e-05	2.2e-07	0.98	1.45	0.5	1.6	0.88	0.068	1.88	2.45	0.44
Amino Acid	Tryptophan Metabolism	5-hydroxyindole sulfate	52914				LC/MS Neg	1928	212.002	69.7859	1	-0.01	0.02	0.7	0	0.01	0.96	0.03	0.02	0.25	0.02	0.02	0.22	0.01	0.01	0.29	0.01	0.01	0.44	0.01	0.01	0.37	0	0.01	0.7	0.02	0.01	0.096	8.5e-06	7.2e-09	-0.51	0.64	0.43	0.56	0.39	0.15	1.24	0.94	0.19
Amino Acid	Tryptophan Metabolism	5-hydroxyindoleacetate	437	1826	C05635	HMDB00763	LC/MS Neg	1510.2	190.051	41.7922	1	0	0.02	0.87	-0.04	0.02	0.1	-0.01	0.01	0.59	0	0	0.92	0	0	0.96	0	0.01	0.88	0	0	0.9	-0.03	0.02	0.13	0	0	0.98	0.007	1.6e-07	-1.3	0.79	0.1	-0.98	0.62	0.12	0.07	0.51	0.88
Amino Acid	Tryptophan Metabolism	7-hydroxyindole sulfate	52915				LC/MS Neg	1765	212.002	65.0278	1	-0.02	0.02	0.23	-0.03	0.01	0.037	0.03	0.02	0.11	-0.01	0.02	0.6	-0.01	0.01	0.12	0	0.01	0.78	-0.02	0.01	0.06	-0.03	0.01	0.0091	0.01	0.01	0.62	0.00029	1.2e-08	-1.61	0.63	0.011	0.12	0.41	0.78	1.7	0.91	0.063
Amino Acid	Tryptophan Metabolism	8-methoxykynurenate	57815				LC/MS Neg	2825	218.046	43.2197	1	0.04	0.02	0.0033	0	0.01	0.73	0	0	0.96	-0.01	0.01	0.11	0	0	0.68	0	0	0.51	-0.01	0.01	0.23	0.02	0.01	0.078	0	0	0.86	0.78	0.12	1.36	0.59	0.022	0.29	0.36	0.42	0.01	0.09	0.88
Amino Acid	Tryptophan Metabolism	C-glycosyltryptophan	48782	10981970			LC/MS Neg	1777	365.135	0	1	-0.14	0.05	0.011	-0.17	0.05	0.0011	-0.04	0.02	0.084	-0.08	0.02	0.00043	-0.05	0.01	1.9e-05	-0.03	0.02	0.044	-0.08	0.02	3.6e-05	-0.16	0.04	2e-05	-0.06	0.02	0.00043	0.0012	1.5e-10	-6.99	1.92	0.00034	-3.66	1.37	0.008	-1.16	0.87	0.19
Amino Acid	Tryptophan Metabolism	Indole-3-carboxylic acid	38116	69867	C19837	HMDB03320	LC/MS Neg	1710	160.04	31.4036	1	0	0.02	0.85	0	0.02	0.82	-0.01	0.03	0.76	-0.01	0.02	0.6	0	0.01	0.74	0	0.02	0.76	0	0.01	0.76	0	0.01	0.9	-0.01	0.02	0.55	0.00015	2.1e-05	0.03	0.68	0.96	0.04	0.48	0.93	0.98	1.08	0.37
Amino Acid	Tryptophan Metabolism	Indoleacetate	27513	802	C00954	HMDB00197	LC/MS Neg	2200	174.056	0.0793	1	0	0.01	0.77	-0.02	0.01	0.06	0	0.01	0.95	0	0.01	0.96	0	0	0.41	0	0.01	0.91	-0.01	0.01	0.17	-0.01	0.01	0.14	0	0.01	0.97	0.011	1e-06	-0.21	0.26	0.42	-0.38	0.27	0.16	-0.19	0.48	0.69
Amino Acid	Tryptophan Metabolism	Indoleacetylglutamine	42087	25200879		HMDB13240	LC/MS Neg	2535	302.115	23.2355	1	-0.01	0	0.14	-0.02	0.01	0.00039	0	0	0.76	-0.01	0	0.027	-0.01	0	0.0054	0	0	0.4	-0.01	0	0.0005	-0.01	0	0.0012	-0.01	0	0.11	0.74	6.9e-05	-0.04	0.15	0.78	-0.49	0.16	0.0021	-0.05	0.17	0.76
Amino Acid	Tryptophan Metabolism	Indolebutyrate	34402	8617	C11284	HMDB02096	LC/MS Neg	3308	202.087	56.9389	1	-0.01	0.01	0.49	-0.03	0.01	0.0024	-0.04	0.02	0.11	-0.02	0.02	0.3	-0.03	0.01	0.0008	-0.02	0.01	0.11	-0.03	0.01	0.0034	-0.03	0.01	0.0034	-0.02	0.01	0.079	9.5e-06	1.1e-06	-0.56	0.57	0.33	-0.9	0.31	0.0037	-2.1	0.99	0.036
Amino Acid	Tryptophan Metabolism	Indolelactate	18349	92904	C02043	HMDB00671	LC/MS Neg	2286	204.067	0	1	-0.01	0.02	0.65	0.01	0.02	0.72	-0.04	0.02	0.14	-0.01	0.03	0.69	-0.01	0.01	0.28	-0.02	0.01	0.14	0	0.02	0.91	0	0.01	0.9	-0.03	0.02	0.13	1e-06	5.5e-06	0.04	0.7	0.96	0.45	0.49	0.37	-0.48	1.03	0.64
Amino Acid	Tryptophan Metabolism	Indolepropionate	32405	3744		HMDB02302	LC/MS Neg	2795	188.072	2.7756	1	0.01	0.01	0.56	0.02	0.01	0.0061	0	0.01	0.78	0.01	0.01	0.52	0.01	0	0.015	0	0.01	0.79	0.01	0.01	0.016	0.02	0.01	0.0055	0.01	0.01	0.53	1.9e-05	0.0024	-0.38	0.45	0.39	0.13	0.2	0.51	0.48	0.64	0.45
Amino Acid	Tryptophan Metabolism	Kynurenate	1417	3845	C01717	HMDB00715	LC/MS Pos Early	2385	190.05	0.0793	1	0.02	0.02	0.3	0.05	0.02	0.03	0	0.01	0.97	-0.04	0.02	0.031	0	0.01	0.7	0	0.01	0.5	-0.01	0.01	0.47	0.04	0.02	0.031	0	0.01	0.49	0.0045	0.00024	0.84	0.89	0.35	0.78	0.64	0.23	0.05	0.32	0.87
Amino Acid	Tryptophan Metabolism	Kynurenine	15140	161166	C00328	HMDB00684	LC/MS Pos Early	2739	209.092	0	1	-0.04	0.04	0.33	-0.02	0.04	0.68	-0.03	0.06	0.59	-0.02	0.05	0.63	-0.02	0.02	0.29	-0.04	0.04	0.31	-0.02	0.03	0.55	-0.03	0.03	0.39	-0.03	0.04	0.43	1.3e-06	1.1e-08	-3.13	1.69	0.065	0.54	1.11	0.63	-3.18	2.66	0.23
Amino Acid	Tryptophan Metabolism	N-acetylkynurenine (2)	48757				LC/MS Neg	2378	249.088	46.3125	1	0	0.01	0.97	0.03	0.02	0.1	0	0.01	0.35	-0.02	0.01	0.13	0	0	0.27	0	0	0.45	-0.01	0.01	0.58	0	0.01	0.76	-0.01	0.01	0.13	0.024	0.11	0.01	0.18	0.97	0.47	0.54	0.38	0.1	0.21	0.65
Amino Acid	Tryptophan Metabolism	N-acetyltryptophan	33959	700653	C03137	HMDB13713	LC/MS Neg	2630	245.093	1.3481	1	0	0.01	0.52	0	0.01	0.88	0	0.01	0.78	-0.04	0.02	0.015	0	0	0.61	0	0	0.65	-0.02	0.01	0.077	0	0.01	0.79	-0.01	0.01	0.31	0.045	0.0032	0.07	0.24	0.77	0.25	0.35	0.48	0.07	0.27	0.81
Amino Acid	Tryptophan Metabolism	N-formylanthranilic acid	43549	101399	C05653	HMDB04089	LC/MS Neg	2150	164.035	20.0634	1	-0.02	0.01	0.012	0.01	0.01	0.29	0	0.01	0.95	0.01	0.02	0.59	-0.01	0.01	0.27	-0.01	0.01	0.046	0.01	0.01	0.26	-0.01	0.01	0.12	0	0.01	0.89	1.1e-06	3.6e-06	-0.07	0.22	0.75	0.08	0.4	0.84	0.2	0.44	0.65
Amino Acid	Tryptophan Metabolism	Picolinate	1512	1018	C10164	HMDB02243	LC/MS Pos Early	910	124.039	7.8509	1	0	0	0.61	0.01	0.01	0.31	-0.02	0.01	0.17	0.01	0.01	0.42	0	0	0.87	-0.01	0	0.25	0.01	0.01	0.21	0	0	0.9	0	0.01	0.68	1.6e-05	0.0016	-0.09	0.18	0.59	-0.08	0.26	0.75	0.17	0.48	0.72
Amino Acid	Tryptophan Metabolism	Serotonin	2342	5202	C00780	HMDB00259	LC/MS Pos Early	2550	177.102	0.8723	1	0.02	0.01	0.19	0.03	0.01	0.021	-0.01	0.02	0.76	0	0.02	0.98	0.01	0.01	0.065	0.01	0.01	0.29	0.02	0.01	0.096	0.02	0.01	0.012	0	0.02	0.91	4e-06	0.0002	-0.27	0.45	0.55	0.33	0.36	0.35	-0.36	0.94	0.71
Amino Acid	Tryptophan Metabolism	Tryptophan	54	6305	C00078	HMDB00929	LC/MS Pos Early	2986	205.097	0	1	0.04	0.06	0.51	0.18	0.05	0.00099	0.09	0.1	0.36	0.1	0.07	0.18	0.11	0.03	0.00067	0.08	0.05	0.13	0.14	0.04	0.0016	0.11	0.04	0.0046	0.11	0.06	0.065	1.8e-06	3.7e-06	0.72	2.25	0.75	5.7	1.5	0.00017	6.59	4.26	0.12
Amino Acid	Tryptophan Metabolism	Tryptophan betaine	37097	442106	C09213	HMDB61115	LC/MS Pos Early	2673	247.144	0.3965	1	0	0.01	0.81	0.01	0	0.22	0.01	0.01	0.28	0	0.01	0.81	0	0	0.12	0.01	0.01	0.25	0	0	0.26	0.01	0	0.18	0	0.01	0.52	0.041	0.00047	0.19	0.42	0.65	0.25	0.12	0.034	0.22	0.42	0.6
Amino Acid	Tryptophan Metabolism	Xanthurenate	15679	5699	C02470	HMDB00881	LC/MS Neg	1476	204.03	25.9318	1	0.02	0.01	0.15	0.03	0.01	0.036	0.01	0.01	0.69	-0.01	0.01	0.54	0.01	0.01	0.063	0.02	0.01	0.074	0.01	0.01	0.38	0.02	0.01	0.02	0	0.01	0.9	0.0025	0.0075	0.68	0.49	0.17	0.69	0.4	0.083	0.62	0.56	0.27
Amino Acid	Tyrosine Metabolism	1-carboxyethyltyrosine	47561				LC/MS Neg	1859	252.088	65.0278	1	0	0.02	0.94	-0.05	0.01	6.8e-05	-0.05	0.02	0.06	-0.05	0.02	0.0034	-0.04	0.01	4.5e-07	-0.02	0.01	0.13	-0.05	0.01	2.5e-06	-0.04	0.01	0.00044	-0.05	0.01	0.00011	6.5e-05	1.2e-07	0.07	0.66	0.91	-0.63	0.37	0.087	-0.31	0.97	0.75
Amino Acid	Tyrosine Metabolism	2-hydroxyphenylacetate	1432	11970	C05852	HMDB00669	LC/MS Polar	858.6	151.04	6.5821	1	-0.03	0.03	0.37	-0.03	0.02	0.086	-0.04	0.02	0.098	-0.03	0.02	0.14	-0.02	0.01	0.021	-0.02	0.02	0.14	-0.02	0.01	0.054	-0.03	0.02	0.046	-0.02	0.01	0.065	5.9e-05	3.8e-08	-0.47	1.11	0.67	-0.86	0.53	0.11	-0.94	0.93	0.31
Amino Acid	Tyrosine Metabolism	3-(4-hydroxyphenyl)lactate	32197	9378	C03672	HMDB00755	LC/MS Neg	1379	181.051	0.0793	1	-0.03	0.03	0.35	-0.01	0.03	0.65	-0.07	0.03	0.029	-0.02	0.03	0.35	-0.04	0.01	0.0054	-0.06	0.02	0.0035	-0.02	0.02	0.25	-0.02	0.02	0.37	-0.05	0.02	0.019	1.2e-06	4.1e-08	0.51	1.29	0.69	1.11	0.73	0.13	-1.76	1.22	0.15
Amino Acid	Tyrosine Metabolism	3-methoxytyramine sulfate	44618				LC/MS Neg	1722	246.044	26.4869	1	-0.03	0.02	0.1	-0.04	0.02	0.033	-0.04	0.03	0.13	-0.08	0.02	0.0021	-0.05	0.01	1.4e-05	-0.04	0.02	0.018	-0.05	0.01	0.00031	-0.03	0.01	0.0084	-0.06	0.02	0.00052	0.0094	0.00023	-1.53	0.72	0.035	-1.1	0.47	0.019	-2.2	1.12	0.051
Amino Acid	Tyrosine Metabolism	3-methoxytyrosine	12017	1670		HMDB01434	LC/MS Pos Early	2555	212.092	0	1	-0.02	0.02	0.37	-0.02	0.03	0.5	0.02	0.05	0.7	-0.05	0.04	0.22	-0.02	0.02	0.23	-0.01	0.02	0.52	-0.03	0.03	0.21	-0.01	0.02	0.4	-0.03	0.03	0.38	0.00031	7.1e-07	-0.09	0.77	0.91	-2.09	0.85	0.014	-2.93	2.23	0.19
Amino Acid	Tyrosine Metabolism	4-hydroxyphenylpyruvate	1669	979	C01179	HMDB00707	LC/MS Neg	1690	179.035	0.0793	1	0.02	0.03	0.57	-0.04	0.03	0.17	-0.11	0.04	0.013	-0.08	0.03	0.012	-0.05	0.02	0.0011	-0.03	0.02	0.26	-0.06	0.02	0.0046	-0.02	0.02	0.34	-0.09	0.03	0.00029	1.8e-05	8.9e-07	0.51	1.1	0.64	0.89	0.71	0.21	-0.39	1.73	0.82
Amino Acid	Tyrosine Metabolism	Catechol glucuronide	53243	75124209			LC/MS Neg	1742	285.062	92.0698	1	.	.	.	.	.	.	.	.	.	.	.	.	.	.	.	.	.	.	.	.	.	.	.	.	.	.	.	.	.	.	.	.	.	.	.	.	.	.
Amino Acid	Tyrosine Metabolism	Dopamine 3-O-sulfate	48407	122136	C13690	HMDB06275	LC/MS Neg	1556.2	232.028	0	1	-0.02	0.02	0.41	-0.03	0.02	0.06	-0.03	0.02	0.27	-0.01	0.01	0.16	-0.02	0.01	0.021	-0.02	0.01	0.14	-0.01	0.01	0.063	-0.02	0.01	0.064	-0.02	0.01	0.085	3.3e-05	7.8e-07	-0.77	0.7	0.27	-0.44	0.49	0.37	-0.11	1.02	0.92
Amino Acid	Tyrosine Metabolism	Dopamine 4-sulfate	48406	123932	C13691	HMDB04148	LC/MS Neg	1511	232.028	50.5155	1	-0.01	0.01	0.58	-0.02	0.01	0.07	0	0.02	0.98	-0.02	0.02	0.3	-0.01	0.01	0.087	0	0.01	0.78	-0.02	0.01	0.049	-0.02	0.01	0.083	-0.01	0.01	0.43	0.00031	1.9e-07	-0.26	0.55	0.63	-0.6	0.34	0.077	0.49	0.91	0.59
Amino Acid	Tyrosine Metabolism	Gentisate	18280	3469	C00628	HMDB00152	LC/MS Neg	1459.8	153.019	10.9437	1	0	0	0.36	0	0	0.037	0	0	0.65	0	0	0.31	0	0	0.33	0	0	0.43	0	0	0.25	0	0	0.22	0	0	0.7	0.92	0.068	0	0.01	0.6	-0.08	0.04	0.032	0.07	0.13	0.6
Amino Acid	Tyrosine Metabolism	Homovanillate (HVA)	1101	1738	C05582	HMDB00118	LC/MS Neg	1649	181.051	37.9857	1	-0.02	0.01	0.25	0	0.01	0.87	0	0.03	0.99	-0.01	0.03	0.59	-0.01	0.01	0.57	-0.01	0.01	0.41	0	0.01	0.88	-0.01	0.01	0.45	0	0.02	0.9	0.00012	2.4e-06	-0.35	0.56	0.53	0.35	0.42	0.41	-0.25	1.17	0.83
Amino Acid	Tyrosine Metabolism	Homovanillate sulfate	38349	29981063		HMDB11719	LC/MS Neg	1047	261.007	94.3695	1	.	.	.	.	.	.	.	.	.	.	.	.	.	.	.	.	.	.	.	.	.	.	.	.	.	.	.	.	.	.	.	.	.	.	.	.	.	.
Amino Acid	Tyrosine Metabolism	N-acetyltyrosine	32390	68310		HMDB00866	LC/MS Neg	1680	222.077	1.9033	1	0.01	0.01	0.58	0.01	0	0.2	-0.04	0.02	0.042	-0.03	0.02	0.13	0	0	0.77	-0.01	0.01	0.34	0	0	0.38	0	0	0.19	-0.04	0.01	0.0084	8.5e-06	0.0058	-0.2	0.41	0.63	0.01	0.01	0.51	-0.63	0.77	0.41
Amino Acid	Tyrosine Metabolism	P-cresol-glucuronide*	48841	154035		HMDB11686	LC/MS Neg	2420	283.082	5.3132	2	-0.02	0.01	0.0065	-0.01	0	0.0035	0	0	0.56	-0.02	0.01	0.0073	0	0	0.016	0	0	0.45	-0.01	0	0.0002	-0.01	0	8.4e-05	0	0	0.25	0.43	1.8e-06	-0.66	0.24	0.0073	-0.13	0.1	0.19	0	0.09	0.96
Amino Acid	Tyrosine Metabolism	Phenol glucuronide	52747	87235		HMDB60014	LC/MS Neg	1800	269.067	59.2387	1	-0.01	0.01	0.38	-0.01	0.01	0.64	0.02	0.02	0.34	0.01	0.02	0.68	0	0.01	0.94	0	0.01	0.93	0	0.01	0.96	-0.01	0.01	0.31	0.01	0.01	0.46	7.6e-06	9.9e-09	-1.07	0.57	0.064	0.19	0.33	0.56	0.12	1.03	0.91
Amino Acid	Tyrosine Metabolism	Phenol sulfate	32553	74426	C02180	HMDB60015	LC/MS Neg	2156	172.991	0	1	0	0.01	0.81	0	0.01	0.63	0	0.01	0.86	0	0.01	0.98	0	0	0.76	0	0.01	0.95	0	0.01	0.81	0	0	0.5	0	0.01	0.95	0.00098	1.4e-05	-0.56	0.28	0.044	0.08	0.17	0.64	0.23	0.49	0.63
Amino Acid	Tyrosine Metabolism	Thyroxine	2761	5819	C01829	HMDB01918	LC/MS Neg	4808	775.679	0.1586	1	0.02	0.04	0.6	-0.02	0.04	0.52	0.11	0.07	0.12	-0.04	0.07	0.56	0	0.03	0.95	0.05	0.04	0.17	-0.03	0.03	0.36	-0.01	0.03	0.7	0.03	0.05	0.55	2.1e-05	9.9e-09	-0.82	1.74	0.64	-1.95	1.06	0.066	1.2	2.9	0.68
Amino Acid	Tyrosine Metabolism	Tyramine O-sulfate	48408	153005		HMDB06409	LC/MS Neg	1565	216.034	4.7581	1	0	0	0.29	0	0	0.19	0	0	0.98	0	0	0.94	0	0	0.32	0	0	0.7	0	0	0.41	0	0	0.093	0	0	0.93	0.027	0.00017	-0.09	0.12	0.45	-0.1	0.09	0.3	0.03	0.17	0.86
Amino Acid	Tyrosine Metabolism	Tyrosine	1299	6057	C00082	HMDB00158	LC/MS Pos Early	2430	182.081	0	1	0.03	0.06	0.61	0.01	0.05	0.76	-0.1	0.08	0.18	-0.11	0.05	0.054	-0.04	0.03	0.12	-0.02	0.05	0.65	-0.05	0.04	0.14	0.02	0.04	0.63	-0.1	0.04	0.019	2.8e-06	4.8e-08	2.05	2.23	0.36	4.29	1.3	0.001	0.42	3.09	0.89
Amino Acid	Tyrosine Metabolism	Vanillactate	54910	160637		HMDB00913	LC/MS Neg	1625	211.061	17.05	1	-0.02	0.01	0.13	-0.02	0.01	0.23	-0.01	0.01	0.38	-0.04	0.02	0.011	-0.01	0.01	0.026	-0.01	0.01	0.23	-0.02	0.01	0.015	-0.02	0.01	0.081	-0.01	0.01	0.061	0.16	1.1e-05	-0.3	0.58	0.6	-0.6	0.41	0.14	-0.17	0.34	0.62
Amino Acid	Tyrosine Metabolism	Vanillic alcohol sulfate	48733				LC/MS Neg	1808	233.013	77.161	1	0.02	0.02	0.17	-0.02	0.01	0.15	0.04	0.02	0.091	-0.02	0.02	0.32	0	0.01	0.98	0.03	0.01	0.016	-0.02	0.01	0.098	0	0.01	0.67	0	0.02	0.91	0.0034	8.4e-08	1.52	0.63	0.017	-0.16	0.42	0.71	-1.78	0.96	0.065
Amino Acid	Tyrosine Metabolism	Vanillylmandelate (VMA)	1567	1245	C05584	HMDB00291	LC/MS Neg	941	197.046	1.0309	1	-0.01	0.03	0.63	0	0.03	0.88	0	0.01	0.73	-0.07	0.02	0.0011	-0.01	0.01	0.18	0	0.01	0.87	-0.04	0.02	0.0079	-0.01	0.02	0.81	-0.02	0.01	0.12	0.0084	2.8e-07	-0.53	1.16	0.65	-1.02	0.83	0.22	-0.2	0.48	0.68
Amino Acid	Urea cycle; Arginine and Proline Metabolism	2-oxoarginine*	55072	558	C03771	HMDB04225	LC/MS Pos Early	1760	174.087	0	2	0.03	0.01	0.084	0	0.01	0.87	0.01	0.02	0.75	-0.01	0.01	0.47	0	0.01	0.8	0.02	0.01	0.06	-0.01	0.01	0.47	0.01	0.01	0.52	-0.01	0.01	0.57	0.0035	2.3e-05	1.11	0.55	0.045	0.39	0.37	0.29	0.98	0.79	0.21
Amino Acid	Urea cycle; Arginine and Proline Metabolism	3-amino-2-piperidone	54704				LC/MS Pos Early	2068.7	115.087	0	1	-0.04	0.03	0.19	-0.03	0.03	0.37	-0.05	0.03	0.12	-0.11	0.04	0.0051	-0.06	0.02	0.0006	-0.04	0.02	0.034	-0.07	0.03	0.0049	-0.03	0.02	0.13	-0.07	0.03	0.003	0.00014	1.7e-07	-0.64	1.19	0.59	-1.2	0.91	0.19	-0.75	1.35	0.58
Amino Acid	Urea cycle; Arginine and Proline Metabolism	Argininate*	57461	160437		HMDB03148	LC/MS Pos Early	2150	176.103	0	2	0.02	0.02	0.5	0.03	0.02	0.091	-0.01	0.03	0.8	0.01	0.02	0.63	0.02	0.01	0.16	0.01	0.02	0.6	0.02	0.01	0.15	0.02	0.01	0.098	0	0.02	0.83	3.7e-06	2.4e-05	0.59	0.87	0.5	0.84	0.55	0.13	0.68	1.04	0.51
Amino Acid	Urea cycle; Arginine and Proline Metabolism	Arginine	1638	232	C00062	HMDB00517	LC/MS Pos Early	2825	175.119	0	1	-0.02	0.07	0.81	0.01	0.06	0.88	0	0.11	0.98	-0.19	0.08	0.02	-0.05	0.04	0.17	0.01	0.06	0.84	-0.08	0.05	0.096	-0.01	0.05	0.89	-0.12	0.06	0.063	5.6e-06	4.4e-08	1.9	2.7	0.48	4.29	1.77	0.016	1.1	4.24	0.8
Amino Acid	Urea cycle; Arginine and Proline Metabolism	Argininosuccinate	15497	828	C03406	HMDB00052	LC/MS Pos Early	2745	291.13	70.4996	1	0	0.02	0.89	0	0.01	0.95	0	0.02	0.88	-0.01	0.02	0.75	0	0.01	0.59	0	0.01	0.75	0	0.01	0.8	0	0.01	0.86	-0.01	0.01	0.67	1.3e-05	9.6e-07	-0.21	0.59	0.73	-0.02	0.37	0.95	-0.67	0.9	0.46
Amino Acid	Urea cycle; Arginine and Proline Metabolism	Citrulline	2132	9750	C00327	HMDB00904	LC/MS Pos Early	1520	176.103	0	1	-0.07	0.05	0.2	0	0.04	0.98	0.01	0.06	0.83	-0.09	0.06	0.12	-0.04	0.03	0.12	-0.02	0.04	0.52	-0.04	0.03	0.24	-0.03	0.03	0.34	-0.05	0.04	0.28	1.7e-06	3.1e-08	-3.02	2.01	0.13	-1.37	1.18	0.24	-1.06	2.32	0.65
Amino Acid	Urea cycle; Arginine and Proline Metabolism	Dimethylarginine (SDMA + ADMA)	36808	123831	C03626	HMDB01539	LC/MS Pos Early	2850	203.15	0	1	-0.19	0.08	0.014	-0.15	0.07	0.04	-0.13	0.08	0.099	-0.16	0.08	0.038	-0.15	0.04	8.2e-05	-0.15	0.05	0.0045	-0.14	0.05	0.0067	-0.17	0.05	0.0017	-0.15	0.06	0.0055	3.9e-07	1.1e-09	-5.11	2.93	0.082	-2.21	2.02	0.27	-5.81	3.28	0.079
Amino Acid	Urea cycle; Arginine and Proline Metabolism	Homoarginine	22137	9085	C01924	HMDB00670	LC/MS Pos Early	2882	189.135	0	1	0.03	0.03	0.19	0.01	0.03	0.58	0.1	0.04	0.0077	-0.01	0.04	0.8	0.03	0.02	0.029	0.07	0.02	0.0015	0.01	0.02	0.8	0.02	0.02	0.25	0.05	0.03	0.1	3.3e-05	2.1e-07	2.96	0.98	0.0028	1.65	0.75	0.028	3.3	1.59	0.039
Amino Acid	Urea cycle; Arginine and Proline Metabolism	Homocitrulline	22138	65072	C02427	HMDB00679	LC/MS Neg	789	188.104	0.3965	1	-0.01	0.02	0.53	-0.01	0.01	0.55	-0.02	0.01	0.01	-0.03	0.02	0.039	-0.02	0.01	0.00032	-0.02	0.01	0.0013	-0.02	0.01	0.086	-0.01	0.01	0.37	-0.03	0.01	0.00036	0.00046	0.00022	-0.61	0.58	0.29	-0.15	0.37	0.69	-0.39	0.38	0.3
Amino Acid	Urea cycle; Arginine and Proline Metabolism	N,N,N-trimethyl-alanylproline betaine (TMAP)	40097				LC/MS Pos Early	2344	229.154	0.0793	1	-0.06	0.05	0.29	-0.03	0.05	0.62	-0.06	0.04	0.16	-0.05	0.03	0.075	-0.04	0.02	0.023	-0.04	0.03	0.12	-0.04	0.02	0.094	-0.04	0.04	0.24	-0.05	0.02	0.024	2.4e-05	2.4e-09	0.79	0.79	0.31	-0.1	1.43	0.94	-1.65	1.64	0.32
Amino Acid	Urea cycle; Arginine and Proline Metabolism	N2,N5-diacetylornithine	43591	10398396			LC/MS Neg	1367	215.104	28.1523	1	-0.01	0.01	0.44	0.01	0.01	0.32	-0.02	0	0.00092	-0.02	0.01	0.03	-0.02	0	1.9e-05	-0.02	0	3.7e-05	-0.01	0.01	0.24	0	0.01	0.94	-0.02	0	1.7e-05	0.0027	0.23	-0.66	0.29	0.023	0.03	0.29	0.92	-0.38	0.21	0.078
Amino Acid	Urea cycle; Arginine and Proline Metabolism	N-acetylarginine	33953	67427	C02562	HMDB04620	LC/MS Pos Early	2245	217.13	0	1	0	0.02	0.85	0.03	0.02	0.19	-0.05	0.02	0.026	0.01	0.03	0.86	-0.01	0.01	0.38	-0.02	0.01	0.092	0.02	0.02	0.34	0.01	0.01	0.62	-0.03	0.02	0.078	6e-07	2.1e-05	0.22	0.68	0.75	1.08	0.61	0.077	-0.41	1.01	0.69
Amino Acid	Urea cycle; Arginine and Proline Metabolism	N-acetylcitrulline	48434	656979	C15532	HMDB00856	LC/MS Neg	940	216.099	7.5337	1	0	0	0.61	0.01	0.01	0.27	-0.01	0	0.0091	0	0.01	0.64	0	0	0.14	0	0	0.21	0	0.01	0.71	0	0	0.59	-0.01	0	0.0045	0.012	0.69	0.01	0.04	0.8	0.35	0.22	0.12	-0.08	0.13	0.53
Amino Acid	Urea cycle; Arginine and Proline Metabolism	N-acetylhomocitrulline	47681				LC/MS Pos Early	1420	232.129	49.9603	1	0	0	0.25	0.01	0.01	0.059	-0.01	0	0.0039	0.01	0.02	0.72	-0.01	0	0.042	-0.01	0	0.0011	0.01	0.01	0.05	0	0	0.88	-0.01	0	0.0024	8.8e-07	0.65	-0.24	0.16	0.13	0.17	0.15	0.28	-0.14	0.18	0.44
Amino Acid	Urea cycle; Arginine and Proline Metabolism	N-delta-acetylornithine	43249	9920500			LC/MS Neg	858	173.093	0	1	0	0.02	0.87	0.03	0.01	0.053	0.01	0.03	0.61	-0.02	0.02	0.32	0	0.01	0.67	0	0.02	0.79	0.01	0.01	0.63	0.02	0.01	0.1	-0.01	0.01	0.53	1.4e-05	0.00011	-0.7	0.71	0.32	-0.27	0.42	0.51	-0.7	1.21	0.57
Amino Acid	Urea cycle; Arginine and Proline Metabolism	N-methylhydroxyproline**	48191				LC/MS Pos Early	1200	146.081	49.3259	3	0	0.01	0.82	-0.01	0.01	0.29	-0.01	0.01	0.49	0	0	0.024	0	0	0.043	0	0.01	0.39	0	0	0.046	0	0	0.42	0	0	0.031	0.024	0.01	-0.42	0.22	0.053	-0.28	0.17	0.088	-0.15	0.53	0.78
Amino Acid	Urea cycle; Arginine and Proline Metabolism	N-methylproline	37431	557			LC/MS Pos Early	1335	130.086	0.0793	1	0	0	0.52	0	0	0.74	0	0	0.25	0	0	0.34	0	0	0.23	0	0	0.12	0	0	0.69	0	0	0.86	0	0	0.15	0.0057	0.081	-0.14	0.07	0.047	-0.02	0.06	0.75	-0.09	0.18	0.61
Amino Acid	Urea cycle; Arginine and Proline Metabolism	Ornithine	1493	6262	C00077	HMDB03374	LC/MS Pos Early	2800	133.097	0	1	-0.07	0.05	0.17	0.01	0.04	0.86	-0.05	0.07	0.47	-0.04	0.06	0.54	-0.03	0.03	0.2	-0.06	0.04	0.14	-0.01	0.03	0.68	-0.02	0.03	0.52	-0.04	0.04	0.32	3.6e-07	2.2e-08	-2.28	1.96	0.25	1.14	1.11	0.31	-1.76	2.76	0.52
Amino Acid	Urea cycle; Arginine and Proline Metabolism	Pro-hydroxy-pro	35127	11673055		HMDB06695	LC/MS Pos Early	2128	229.118	0	1	-0.04	0.02	0.051	-0.02	0.02	0.26	-0.04	0.02	0.13	-0.05	0.03	0.1	-0.04	0.01	0.0016	-0.04	0.02	0.019	-0.03	0.02	0.043	-0.03	0.01	0.034	-0.04	0.02	0.025	3.5e-05	5e-07	-1.58	0.84	0.063	0.08	0.52	0.88	-1.51	1.05	0.15
Amino Acid	Urea cycle; Arginine and Proline Metabolism	Proline	1898	145742	C00148	HMDB00162	LC/MS Pos Early	1603	116.071	0	1	-0.03	0.06	0.54	-0.13	0.04	0.001	0.14	0.1	0.15	-0.1	0.05	0.076	-0.08	0.03	0.0015	0.02	0.05	0.65	-0.11	0.03	0.0004	-0.1	0.03	0.00083	-0.05	0.05	0.28	1.4e-06	3.2e-10	-0.26	2.1	0.9	-0.45	1.08	0.68	3.44	3.83	0.37
Amino Acid	Urea cycle; Arginine and Proline Metabolism	Trans-4-hydroxyproline	32306	5810	C01157	HMDB00725	LC/MS Pos Early	1064	132.066	0	1	-0.02	0.02	0.35	-0.04	0.03	0.14	0	0.04	0.92	-0.07	0.03	0.032	-0.04	0.01	0.0073	-0.02	0.02	0.36	-0.05	0.02	0.0082	-0.03	0.02	0.078	-0.05	0.02	0.051	0.002	2.5e-07	-0.45	0.76	0.56	-0.31	0.69	0.66	1.72	1.16	0.14
Amino Acid	Urea cycle; Arginine and Proline Metabolism	Urea	1670	1176	C00086	HMDB00294	LC/MS Pos Early	700	121.072	0	1	-0.05	0.03	0.12	0.08	0.03	0.0055	-0.1	0.04	0.016	0.07	0.03	0.052	0.02	0.02	0.33	-0.07	0.02	0.0047	0.07	0.02	0.00075	0.03	0.02	0.25	0	0.03	0.95	5.9e-10	7.6e-07	-0.84	1.27	0.51	1.13	0.84	0.18	-1.04	1.69	0.54
Carbohydrate	Advanced Glycation End-product	N6-carboxymethyllysine	36713	123800			LC/MS Pos Early	2500	205.118	10.7058	1	0	0.01	0.74	-0.02	0.01	0.12	-0.01	0.01	0.24	-0.02	0.01	0.016	-0.01	0	0.021	0	0.01	0.55	-0.02	0.01	0.0054	-0.01	0.01	0.24	-0.01	0.01	0.025	0.15	2.2e-05	-0.43	0.51	0.4	-0.67	0.35	0.059	0.02	0.34	0.95
Carbohydrate	Aminosugar Metabolism	3'-a-sialyl-N-acetyllactosamine	40042				LC/MS Polar	3300	673.231	99.7621	1	.	.	.	.	.	.	.	.	.	.	.	.	.	.	.	.	.	.	.	.	.	.	.	.	.	.	.	.	.	.	.	.	.	.	.	.	.	.
Carbohydrate	Aminosugar Metabolism	6-sialyl-N-acetyllactosamine	40428	16212424		HMDB06584	LC/MS Polar	3641	673.231	98.4933	1	.	.	.	.	.	.	.	.	.	.	.	.	.	.	.	.	.	.	.	.	.	.	.	.	.	.	.	.	.	.	.	.	.	.	.	.	.	.
Carbohydrate	Aminosugar Metabolism	Erythronate*	42420	2781043		HMDB00613	LC/MS Polar	2186	135.03	0	2	-0.08	0.05	0.14	-0.15	0.03	1.4e-05	-0.02	0.02	0.36	-0.08	0.03	0.0033	-0.05	0.01	8e-05	-0.02	0.02	0.27	-0.09	0.02	6.2e-06	-0.13	0.03	3.7e-06	-0.04	0.02	0.01	0.0018	1.6e-11	-5.4	1.97	0.0065	-3	0.92	0.0011	-1.02	0.93	0.27
Carbohydrate	Aminosugar Metabolism	Glucuronate	15443	444791	C00191	HMDB00127	LC/MS Polar	3233.3	193.035	0	1	-0.02	0.01	0.14	-0.04	0.01	9.2e-05	-0.02	0.01	0.26	-0.04	0.01	0.0049	-0.03	0.01	3.9e-06	-0.02	0.01	0.076	-0.04	0.01	5.3e-06	-0.03	0.01	5.3e-05	-0.03	0.01	0.0036	0.028	3.1e-07	-0.53	0.43	0.22	-0.62	0.31	0.045	-0.79	0.55	0.16
Carbohydrate	Aminosugar Metabolism	N-acetylglucosaminylasparagine	48149	123826	C04540	HMDB00489	LC/MS Pos Early	1212	336.14	8.5646	1	-0.05	0.03	0.037	-0.04	0.02	0.1	-0.02	0.02	0.43	-0.05	0.02	0.0047	-0.03	0.01	0.0012	-0.02	0.01	0.18	-0.04	0.01	0.0019	-0.04	0.02	0.01	-0.03	0.01	0.01	0.001	4.6e-09	-2.32	0.96	0.016	-1.47	0.65	0.024	-1.06	0.87	0.23
Carbohydrate	Aminosugar Metabolism	N-acetylneuraminate	32377	439197	C00270	HMDB00230	LC/MS Polar	3072.6	308.099	0	1	-0.1	0.03	0.0047	-0.15	0.04	0.00019	-0.04	0.02	0.054	-0.11	0.03	2.9e-05	-0.07	0.01	4.5e-08	-0.04	0.02	0.0078	-0.1	0.02	2.2e-07	-0.12	0.03	2.8e-06	-0.07	0.02	3.5e-05	0.012	1.5e-10	-4.32	1.24	0.00058	-1.84	1.07	0.085	-0.79	0.94	0.4
Carbohydrate	Disaccharides and Oligosaccharides	3-sialyllactose	40424	123914		HMDB00825	LC/MS Neg	730	632.204	98.8898	1	.	.	.	.	.	.	.	.	.	.	.	.	.	.	.	.	.	.	.	.	.	.	.	.	.	.	.	.	.	.	.	.	.	.	.	.	.	.
Carbohydrate	Disaccharides and Oligosaccharides	Sucrose	1519	5988	C00089	HMDB00258	LC/MS Polar	3092	387.114	24.663	1	0	0	0.93	-0.01	0	0.0034	0	0	0.82	0	0	0.17	0	0	0.027	0	0	0.95	0	0	0.0035	0	0	0.013	0	0	0.35	0.67	0.0041	0.07	0.08	0.34	-0.06	0.05	0.28	0.02	0.1	0.84
Carbohydrate	Fructose, Mannose and Galactose Metabolism	Fructose	48195	5984	C00095	HMDB00660	LC/MS Polar	2065	225.062	0	1	0	0.03	0.98	-0.02	0.03	0.57	0.05	0.05	0.3	-0.01	0.04	0.89	-0.01	0.02	0.7	0.01	0.02	0.64	-0.01	0.02	0.55	-0.01	0.02	0.62	0	0.03	0.91	1.8e-05	2.2e-08	-0.24	1.2	0.84	-0.81	0.81	0.32	2.26	1.55	0.15
Carbohydrate	Fructose, Mannose and Galactose Metabolism	Galactonate	27719	128869	C00880	HMDB00565	LC/MS Polar	3085	195.051	30.7692	1	0.02	0.02	0.31	0	0.01	0.56	0	0	0.74	0	0	0.45	0	0	0.38	0	0	0.51	0	0	0.54	0	0.01	0.82	0	0	0.52	0.077	0.0016	-0.83	0.63	0.19	-0.27	0.19	0.15	0.27	0.12	0.023
Carbohydrate	Fructose, Mannose and Galactose Metabolism	Mannitol/sorbitol	46142	5780	C00794	HMDB00247	LC/MS Polar	2320	181.072	0	1	0	0	0.13	0	0	0.15	0	0.01	0.64	0	0	0.98	0	0	0.11	0	0	0.1	0	0	0.33	0	0	0.047	0	0	0.85	0.015	0.0011	-0.08	0.08	0.28	-0.01	0.04	0.81	-0.28	0.2	0.15
Carbohydrate	Fructose, Mannose and Galactose Metabolism	Mannose	48153	18950	C00159	HMDB00169	LC/MS Polar	2200	225.062	0	1	-0.01	0.04	0.85	0	0.03	0.97	-0.01	0.04	0.79	-0.09	0.04	0.034	-0.03	0.02	0.1	-0.01	0.03	0.81	-0.03	0.02	0.18	-0.01	0.02	0.76	-0.06	0.03	0.058	1.6e-05	6.4e-08	-0.54	1.33	0.68	0.27	0.78	0.73	-0.6	1.76	0.74
Carbohydrate	Glycogen Metabolism	Maltose	15586	10991489	C00208	HMDB00163	LC/MS Polar	3329.4	387.114	6.1063	1	0	0.02	0.9	-0.04	0.01	0.0023	-0.02	0.02	0.24	-0.04	0.01	0.0029	-0.03	0.01	4.1e-06	-0.02	0.01	0.11	-0.04	0.01	1.9e-05	-0.03	0.01	0.01	-0.04	0.01	0.0004	0.00083	6.8e-06	-0.39	0.67	0.56	-1.04	0.38	0.0067	0	0.85	1
Carbohydrate	Glycogen Metabolism	Maltotriose	44688	439586	C01835	HMDB01262	LC/MS Polar	4286.4	549.167	69.3894	1	0.02	0.02	0.45	-0.02	0.01	0.13	-0.01	0.03	0.7	-0.02	0.02	0.24	-0.02	0.01	0.055	0	0.02	0.94	-0.02	0.01	0.055	-0.01	0.01	0.32	-0.02	0.01	0.16	5.9e-05	3.1e-07	-0.98	0.75	0.19	-0.17	0.36	0.63	0.69	1.08	0.53
Carbohydrate	Glycolysis, Gluconeogenesis, and Pyruvate Metaboli	1,5-anhydroglucitol (1,5-AG)	20675	64960	C07326	HMDB02712	LC/MS Neg	802	163.061	0	1	-0.04	0.03	0.23	0.02	0.03	0.37	0.02	0.05	0.69	0.05	0.04	0.17	0.01	0.02	0.41	-0.02	0.03	0.37	0.03	0.02	0.11	0	0.02	0.94	0.04	0.03	0.19	2.4e-07	4e-08	-2.06	1.13	0.071	0.48	0.74	0.52	0.39	2.02	0.85
Carbohydrate	Glycolysis, Gluconeogenesis, and Pyruvate Metaboli	Glucose	20488	79025	C00031	HMDB00122	LC/MS Polar	2342	179.056	0	1	0.02	0.04	0.59	-0.04	0.03	0.29	0.03	0.06	0.65	-0.18	0.06	0.0027	-0.05	0.02	0.038	0.03	0.04	0.47	-0.08	0.03	0.0082	-0.02	0.03	0.39	-0.09	0.04	0.043	2.2e-05	3.4e-08	-1.03	1.46	0.48	-0.24	0.98	0.81	2.15	2.42	0.38
Carbohydrate	Glycolysis, Gluconeogenesis, and Pyruvate Metaboli	Glycerate	1572	752	C00258	HMDB00139	LC/MS Polar	2070.4	105.019	0	1	0.1	0.05	0.027	0.12	0.03	7.6e-05	-0.11	0.06	0.063	0.05	0.05	0.31	0.07	0.02	0.0017	0	0.04	0.93	0.1	0.03	0.00028	0.12	0.03	2.1e-06	-0.02	0.04	0.64	4.2e-08	2.5e-06	-1	1.79	0.57	0.21	0.88	0.81	-3.2	2.28	0.16
Carbohydrate	Glycolysis, Gluconeogenesis, and Pyruvate Metaboli	Lactate	527	612	C00186	HMDB00190	LC/MS Polar	1468.8	89.0244	0	1	-0.03	0.05	0.52	-0.07	0.04	0.065	-0.04	0.08	0.63	-0.03	0.06	0.56	-0.06	0.03	0.019	-0.05	0.04	0.31	-0.06	0.03	0.073	-0.06	0.03	0.041	-0.05	0.05	0.32	7.1e-07	2e-09	-0.29	1.93	0.88	-1.11	1.16	0.34	2.18	3.57	0.54
Carbohydrate	Glycolysis, Gluconeogenesis, and Pyruvate Metaboli	Pyruvate	48990	1060	C00022	HMDB00243	LC/MS Polar	1083	87.0088	0	1	-0.01	0.03	0.64	-0.05	0.02	0.03	0.01	0.05	0.88	-0.01	0.03	0.72	-0.03	0.02	0.05	-0.01	0.03	0.77	-0.03	0.02	0.076	-0.04	0.02	0.026	-0.02	0.03	0.57	1.3e-05	2.6e-09	1.07	1.04	0.3	-0.2	0.67	0.76	0.54	1.96	0.78
Carbohydrate	Pentose Metabolism	Arabitol/xylitol	48885	6912	C01904		LC/MS Polar	1932.4	151.061	0	1	-0.03	0.02	0.058	-0.01	0.01	0.45	-0.01	0.02	0.48	-0.09	0.03	0.0016	-0.02	0.01	0.0034	-0.02	0.01	0.084	-0.03	0.01	0.027	-0.02	0.01	0.052	-0.03	0.01	0.017	0.00037	5.4e-06	-0.93	0.6	0.12	-0.41	0.42	0.33	-0.62	0.66	0.35
Carbohydrate	Pentose Metabolism	Arabonate/xylonate	48255				LC/MS Polar	2700	165.04	0	1	-0.01	0.03	0.68	-0.01	0.02	0.82	-0.02	0.01	0.18	-0.03	0.01	0.013	-0.02	0.01	0.0083	-0.02	0.01	0.16	-0.02	0.01	0.026	-0.01	0.02	0.62	-0.02	0.01	0.0049	0.00041	8.6e-07	-1.8	1.1	0.1	-1	0.64	0.12	-0.46	0.6	0.44
Carbohydrate	Pentose Metabolism	Ribitol	15772	6912	C00474	HMDB00508	LC/MS Polar	1789.6	151.061	7.2165	1	-0.01	0.02	0.76	-0.01	0.01	0.37	-0.01	0.01	0.61	-0.08	0.03	0.0033	-0.02	0.01	0.017	-0.01	0.01	0.45	-0.02	0.01	0.031	-0.01	0.01	0.26	-0.03	0.01	0.034	0.0011	4.9e-05	-0.45	0.75	0.55	-0.03	0.33	0.92	-0.48	0.62	0.44
Carbohydrate	Pentose Metabolism	Ribonate	27731	5460677	C01685	HMDB00867	LC/MS Polar	2425	165.04	0.2379	1	0	0.04	0.99	-0.04	0.02	0.1	0	0.02	0.91	-0.09	0.03	0.0038	-0.03	0.01	0.023	0	0.02	0.97	-0.06	0.02	0.0016	-0.03	0.02	0.11	-0.03	0.02	0.099	0.0018	2e-08	0.72	1.15	0.53	-1.1	0.69	0.11	-0.16	0.81	0.85
Carbohydrate	Pentose Metabolism	Xylose	15581	135191	C00181	HMDB00098	LC/MS Polar	1727	195.051	37.0341	1	.	.	.	.	.	.	.	.	.	.	.	.	.	.	.	.	.	.	.	.	.	.	.	.	.	.	.	.	.	.	.	.	.	.	.	.	.	.
Cofactors & Vitamins	Tocopherol Metabolism	Gamma-CEHC sulfate*	47576				LC/MS Neg	2902	343.086	67.8826	2	0.02	0.01	0.23	-0.03	0.02	0.065	0.03	0.02	0.14	-0.01	0.02	0.49	0	0.01	0.95	0.02	0.01	0.033	-0.02	0.01	0.086	-0.01	0.01	0.56	0.01	0.01	0.65	0.0037	2.3e-08	0.45	0.53	0.4	-0.03	0.44	0.95	0.84	0.83	0.31
Cofactors and Vitamins	Ascorbate and Aldarate Metabolism	Ascorbate (Vitamin C)	32354		C00072	HMDB00044	LC/MS Pos Early	770	177.039	94.4489	1	.	.	.	.	.	.	.	.	.	.	.	.	.	.	.	.	.	.	.	.	.	.	.	.	.	.	.	.	.	.	.	.	.	.	.	.	.	.
Cofactors and Vitamins	Ascorbate and Aldarate Metabolism	Gulonate*	46957	9794176	C00257	HMDB03290	LC/MS Polar	2750	195.051	5.6305	2	-0.05	0.02	0.0062	-0.06	0.02	0.00058	0	0	0.4	-0.02	0.01	0.026	-0.01	0	0.019	0	0	0.33	-0.02	0.01	0.0037	-0.06	0.01	6.9e-06	-0.01	0	0.089	0.59	9.8e-12	-1.45	0.71	0.041	-1.4	0.46	0.0027	-0.09	0.21	0.68
Cofactors and Vitamins	Ascorbate and Aldarate Metabolism	Oxalate (ethanedioate)	20694	971	C00209	HMDB02329	LC/MS Neg	603	88.988	0	1	0.05	0.02	0.031	0.07	0.01	6.3e-07	-0.02	0.04	0.66	0.06	0.02	0.007	0.06	0.01	4.8e-09	0.02	0.02	0.19	0.06	0.01	4.1e-08	0.07	0.01	1.5e-08	0.04	0.02	0.016	3e-08	1.2e-06	-0.15	0.82	0.85	0.21	0.41	0.61	-1.25	1.44	0.39
Cofactors and Vitamins	Ascorbate and Aldarate Metabolism	Threonate	27738	151152	C01620	HMDB00943	LC/MS Polar	2384	135.03	0.3965	1	0.02	0.02	0.13	0.04	0.01	4.2e-05	-0.03	0.02	0.22	0.02	0.02	0.14	0.03	0.01	0.00011	0	0.01	0.86	0.04	0.01	5.3e-05	0.04	0.01	5.1e-06	0.01	0.01	0.51	3.1e-08	0.00014	0.02	0.59	0.97	0.09	0.29	0.77	-1.25	0.91	0.17
Cofactors and Vitamins	Biotin Metabolism	Biotin	568	171548	C00120	HMDB00030	LC/MS Pos Early	2253	245.095	97.7795	1	.	.	.	.	.	.	.	.	.	.	.	.	.	.	.	.	.	.	.	.	.	.	.	.	.	.	.	.	.	.	.	.	.	.	.	.	.	.
Cofactors and Vitamins	Hemoglobin and Porphyrin Metabolism	Bilirubin (E,E)*	32586	5315454			LC/MS Neg	4294	583.256	0	2	0	0.02	0.96	0.03	0.02	0.14	0.05	0.02	0.047	0.03	0.02	0.22	0.02	0.01	0.017	0.02	0.02	0.15	0.02	0.01	0.071	0.02	0.01	0.18	0.03	0.02	0.039	1.4e-05	1.9e-06	0.69	0.87	0.43	-0.04	0.48	0.93	1.22	1	0.22
Cofactors and Vitamins	Hemoglobin and Porphyrin Metabolism	Bilirubin (E,Z or Z,E)*	47886	5799469		HMDB00488	LC/MS Pos Late	1265	585.271	0.4758	2	-0.02	0.03	0.51	0.05	0.02	0.024	0.06	0.03	0.047	0.01	0.02	0.72	0.02	0.01	0.063	0.02	0.02	0.32	0.02	0.01	0.13	0.02	0.02	0.12	0.02	0.02	0.2	4.6e-06	1.5e-05	1.39	0.99	0.16	0.07	0.59	0.91	0.35	1.31	0.79
Cofactors and Vitamins	Hemoglobin and Porphyrin Metabolism	Bilirubin (Z,Z)	43807	5280352	C00486	HMDB00054	LC/MS Pos Late	1840	585.271	0	1	-0.01	0.03	0.78	0.05	0.02	0.023	0.09	0.04	0.0098	0.01	0.03	0.65	0.03	0.01	0.016	0.04	0.02	0.092	0.03	0.02	0.085	0.03	0.02	0.07	0.04	0.02	0.082	7.5e-06	6.7e-06	1.14	1.13	0.31	0.22	0.65	0.73	0.83	1.49	0.58
Cofactors and Vitamins	Hemoglobin and Porphyrin Metabolism	Biliverdin	2137	5353439	C00500	HMDB01008	LC/MS Pos Late	1016	583.255	3.0928	1	0	0.02	0.93	0.01	0.01	0.64	0.03	0.02	0.13	0	0.01	0.76	0	0.01	0.72	0.01	0.01	0.39	0	0.01	0.95	0.01	0.01	0.62	0	0.01	0.78	0.00027	2.6e-05	0.94	0.73	0.2	-0.32	0.35	0.36	0.97	0.9	0.28
Cofactors and Vitamins	Hemoglobin and Porphyrin Metabolism	I-urobilinogen	32426	26818	C05790	HMDB04157	LC/MS Neg	4190	591.319	53.1324	1	-0.01	0.01	0.36	-0.04	0.01	0.00053	0	0.02	0.93	-0.02	0.02	0.26	-0.02	0.01	0.00096	-0.01	0.01	0.24	-0.03	0.01	0.0024	-0.03	0.01	0.00067	-0.02	0.01	0.21	0.00012	3.6e-09	0.22	0.55	0.69	-0.19	0.34	0.58	-1.29	0.84	0.13
Cofactors and Vitamins	Hemoglobin and Porphyrin Metabolism	L-urobilin	40173	5280818	C05793	HMDB04159	LC/MS Pos Late	901	595.349	71.3719	1	-0.01	0.01	0.43	-0.02	0.02	0.15	0	0.02	0.83	-0.01	0.02	0.43	-0.01	0.01	0.089	-0.01	0.01	0.44	-0.02	0.01	0.11	-0.02	0.01	0.12	-0.01	0.01	0.47	0.00021	2.3e-07	-0.55	0.54	0.32	-0.81	0.44	0.069	-0.49	0.89	0.58
Cofactors and Vitamins	Nicotinate and Nicotinamide Metabolism	1-methylnicotinamide	27665	10129985	C02918	HMDB00699	LC/MS Pos Early	1940	137.071	0	1	0	0.02	0.91	0	0	0.18	-0.02	0.03	0.44	0.02	0.02	0.14	0	0	0.44	-0.01	0.02	0.63	0	0	0.39	0	0	0.21	0.02	0.01	0.21	2.4e-05	3.4e-07	1.27	0.71	0.076	-0.21	0.09	0.022	-1.37	1.01	0.18
Cofactors and Vitamins	Nicotinate and Nicotinamide Metabolism	N1-Methyl-2-pyridone-5-carboxamide	40469	69698	C05842	HMDB04193	LC/MS Neg	1668	151.051	0	1	-0.01	0.02	0.63	-0.01	0.01	0.36	-0.05	0.02	0.0081	0.02	0.02	0.16	-0.01	0.01	0.33	-0.04	0.01	0.0071	0	0.01	0.84	-0.01	0.01	0.33	-0.01	0.01	0.6	1.4e-07	1.7e-06	-0.18	0.8	0.82	-0.48	0.26	0.059	-1.77	0.79	0.027
Cofactors and Vitamins	Nicotinate and Nicotinamide Metabolism	Nicotinamide	594	936	C00153	HMDB01406	LC/MS Pos Early	1942	123.055	2.6963	1	0	0.03	0.97	-0.01	0.01	0.16	-0.02	0.02	0.52	0.05	0.03	0.068	0	0.01	0.6	-0.01	0.02	0.61	0	0.01	0.59	-0.01	0.01	0.19	0.02	0.02	0.25	1.9e-05	1.2e-08	2.3	1.01	0.023	-0.5	0.22	0.023	-0.61	1.05	0.56
Cofactors and Vitamins	Nicotinate and Nicotinamide Metabolism	Nicotinurate	35121	68499	C05380	HMDB03269	LC/MS Neg	1467	179.046	99.7621	1	.	.	.	.	.	.	.	.	.	.	.	.	.	.	.	.	.	.	.	.	.	.	.	.	.	.	.	.	.	.	.	.	.	.	.	.	.	.
Cofactors and Vitamins	Nicotinate and Nicotinamide Metabolism	Quinolinate	1899	1066	C03722	HMDB00232	LC/MS Pos Early	845	168.029	0	1	-0.01	0.01	0.31	-0.02	0.02	0.2	-0.02	0.01	0.15	-0.06	0.02	0.0092	-0.02	0.01	0.0089	-0.01	0.01	0.14	-0.03	0.01	0.0085	-0.02	0.01	0.12	-0.02	0.01	0.016	0.018	2.5e-06	-0.86	0.55	0.12	-1.05	0.47	0.026	-0.51	0.45	0.25
Cofactors and Vitamins	Nicotinate and Nicotinamide Metabolism	Trigonelline (N'-methylnicotinate)	32401	5570	C01004	HMDB00875	LC/MS Pos Early	1388	138.055	0	1	0.01	0.01	0.19	0	0	0.48	0.01	0.01	0.35	0	0.01	0.79	0	0	0.26	0.01	0.01	0.18	0	0	0.76	0.01	0	0.19	0	0	0.75	0.024	0.0017	0.08	0.36	0.82	0.13	0.13	0.3	-0.2	0.28	0.48
Cofactors and Vitamins	Pantothenate and CoA Metabolism	Pantothenate	1508	6613	C00864	HMDB00210	LC/MS Neg	1498.7	218.103	0	1	0.01	0.02	0.51	0	0.01	0.61	-0.01	0.03	0.76	0	0.01	0.97	0	0.01	0.54	0.01	0.02	0.64	0	0.01	0.65	0.01	0.01	0.45	0	0.01	0.84	0.00017	1.2e-05	0.02	0.63	0.97	-0.41	0.22	0.062	-0.89	1.13	0.43
Cofactors and Vitamins	Tocopherol Metabolism	Alpha-CEHC	48188	9943542		HMDB01518	LC/MS Neg	4045	277.145	78.9056	1	.	.	.	.	.	.	.	.	.	.	.	.	.	.	.	.	.	.	.	.	.	.	.	.	.	.	.	.	.	.	.	.	.	.	.	.	.	.
Cofactors and Vitamins	Tocopherol Metabolism	Alpha-CEHC glucuronide*	39346				LC/MS Neg	2616	453.177	87.391	2	.	.	.	.	.	.	.	.	.	.	.	.	.	.	.	.	.	.	.	.	.	.	.	.	.	.	.	.	.	.	.	.	.	.	.	.	.	.
Cofactors and Vitamins	Tocopherol Metabolism	Alpha-CEHC sulfate	47666				LC/MS Neg	3090	357.101	73.1959	1	0.01	0.02	0.51	0.01	0.01	0.41	-0.03	0.03	0.3	0.02	0.02	0.37	0.01	0.01	0.27	0	0.02	0.82	0.01	0.01	0.2	0.01	0.01	0.27	0.01	0.01	0.7	1.9e-06	5.2e-07	0.06	0.76	0.94	-0.06	0.35	0.86	-1.11	1.21	0.36
Cofactors and Vitamins	Tocopherol Metabolism	Alpha-tocopherol	1561	14985	C02477	HMDB01893	LC/MS Pos Late	2522	430.378	0	1	0.11	0.05	0.039	0.06	0.04	0.14	0.03	0.09	0.74	0.07	0.05	0.2	0.07	0.03	0.007	0.09	0.05	0.059	0.06	0.03	0.048	0.07	0.03	0.018	0.06	0.05	0.21	1.3e-05	1.4e-08	-0.18	2.08	0.93	-0.31	1.09	0.77	3.39	3.79	0.37
Cofactors and Vitamins	Tocopherol Metabolism	Delta-tocopherol	33418	92094	C14151	HMDB02902	LC/MS Pos Late	2259	402.349	61.0626	1	0.02	0.01	0.26	-0.02	0.01	0.042	-0.03	0.02	0.24	-0.03	0.02	0.1	-0.02	0.01	0.041	0	0.01	0.9	-0.03	0.01	0.0092	-0.01	0.01	0.31	-0.02	0.01	0.07	0.00048	1.8e-06	-0.17	0.54	0.75	0.1	0.34	0.77	-0.16	0.97	0.87
Cofactors and Vitamins	Tocopherol Metabolism	Gamma-CEHC	44876	133098		HMDB01931	LC/MS Neg	3843	263.129	0	1	0.01	0.02	0.59	0	0.01	0.99	0.01	0.02	0.73	-0.01	0.02	0.51	0	0.01	0.74	0.02	0.02	0.26	0	0.01	0.74	0	0.01	0.85	0	0.01	0.97	0.0011	9.7e-07	0.33	0.81	0.69	0.41	0.37	0.27	-0.48	1	0.63
Cofactors and Vitamins	Tocopherol Metabolism	Gamma-CEHC glucuronide*	42381				LC/MS Neg	2500	439.161	22.2046	2	-0.01	0.02	0.41	-0.03	0.01	0.0083	0	0	0.88	-0.02	0.01	0.01	0	0	0.36	0	0	0.85	-0.02	0.01	0.0016	-0.03	0.01	0.0051	0	0	0.45	0.27	3.1e-08	-0.3	0.59	0.61	-0.26	0.33	0.43	-0.01	0.11	0.92
Cofactors and Vitamins	Tocopherol Metabolism	Gamma-tocopherol/beta-tocopherol	52473				LC/MS Pos Late	2384	416.364	0	1	-0.05	0.03	0.054	-0.01	0.02	0.62	0.01	0.03	0.76	-0.01	0.02	0.57	-0.01	0.01	0.21	-0.02	0.02	0.33	-0.01	0.01	0.48	-0.02	0.01	0.17	-0.01	0.02	0.63	5.6e-06	5.5e-08	-1.33	0.95	0.16	0.49	0.48	0.31	0.68	1.32	0.61
Cofactors and Vitamins	Vitamin A Metabolism	Beta-cryptoxanthin	57591	6384256		HMDB33844	LC/MS Pos Late	2560	552.433	1.2688	1	0.01	0.01	0.43	0.02	0.01	0.00017	0.03	0.01	0.083	0.02	0.01	0.015	0.02	0	2.7e-07	0.02	0.01	0.075	0.02	0.01	5.5e-06	0.02	0.01	6.6e-05	0.02	0.01	0.0019	5.8e-06	4.4e-05	-0.55	0.52	0.28	0.17	0.17	0.33	1.44	0.61	0.019
Cofactors and Vitamins	Vitamin A Metabolism	Carotene diol (1)	57635				LC/MS Pos Late	1720	568.428	0	1	0.03	0.02	0.2	0.06	0.02	0.00049	0.03	0.04	0.37	0.07	0.03	0.0089	0.05	0.01	1e-06	0.03	0.02	0.082	0.06	0.01	1.2e-05	0.05	0.01	0.00015	0.06	0.02	0.0042	5.3e-09	7.2e-08	0.17	0.84	0.84	0.6	0.47	0.21	1.02	1.6	0.52
Cofactors and Vitamins	Vitamin A Metabolism	Carotene diol (2)	57636				LC/MS Pos Late	1904	568.428	0	1	0.02	0.02	0.28	0.05	0.02	0.0014	0.01	0.04	0.74	0.07	0.03	0.019	0.05	0.01	3.9e-05	0.02	0.02	0.33	0.05	0.01	0.00011	0.04	0.01	0.00044	0.05	0.02	0.024	1.7e-09	9.6e-08	0	0.88	1	0.54	0.45	0.23	0.87	1.56	0.57
Cofactors and Vitamins	Vitamin A Metabolism	Carotene diol (3)	57637				LC/MS Pos Late	1948	568.428	3.1721	1	0.03	0.02	0.11	0.06	0.02	0.00035	0.01	0.03	0.86	0.07	0.02	0.0039	0.05	0.01	4.1e-06	0.02	0.02	0.18	0.06	0.01	5.6e-06	0.05	0.01	0.00012	0.05	0.02	0.0086	3.6e-10	3.9e-06	-0.25	0.75	0.74	0.45	0.5	0.36	0.75	1.22	0.54
Cofactors and Vitamins	Vitamin A Metabolism	Retinol (Vitamin A)	1806	445354	C00473	HMDB00305	LC/MS Pos Late	1636	269.226	0	1	0.02	0.04	0.67	0.02	0.03	0.48	0.02	0.05	0.72	0.07	0.04	0.1	0.04	0.02	0.047	0.03	0.03	0.42	0.05	0.03	0.071	0.02	0.03	0.44	0.06	0.03	0.087	1.9e-06	6.4e-08	-0.88	1.67	0.6	-1.1	0.89	0.22	3.03	2.13	0.16
Cofactors and Vitamins	Vitamin B6 Metabolism	Pyridoxal	1651	1050	C00250	HMDB01545	LC/MS Neg	1534.9	166.051	79.3814	1	0.02	0.02	0.34	-0.02	0.01	0.24	-0.02	0.04	0.56	0.03	0.02	0.057	0.01	0.01	0.42	0.01	0.02	0.59	0.01	0.01	0.56	-0.01	0.01	0.57	0.03	0.02	0.097	1.6e-05	3.6e-09	2.23	0.88	0.012	-0.25	0.38	0.51	-1.69	1.38	0.22
Cofactors and Vitamins	Vitamin B6 Metabolism	Pyridoxate	31555	6723	C00847	HMDB00017	LC/MS Neg	2185	182.046	0.1586	1	0	0.01	0.79	0	0	0.78	0	0	0.46	0	0	0.14	0	0	0.22	0	0	0.48	0	0	0.28	0	0	0.76	0	0	0.11	0.19	0.95	0.4	0.27	0.14	-0.01	0.02	0.78	-0.03	0.06	0.61
Cofactors and Vitamins	Vitamin B6 Metabolism	Pyridoxine (Vitamin B6)	608	1054	C00314	HMDB02075	LC/MS Neg	1657	168.067	99.9207	1	.	.	.	.	.	.	.	.	.	.	.	.	.	.	.	.	.	.	.	.	.	.	.	.	.	.	.	.	.	.	.	.	.	.	.	.	.	.
Energy	Oxidative Phosphorylation	Phosphate	42109	1061	C00009	HMDB01429	LC/MS Pos Early	576	98.9842	0	1	-0.01	0.03	0.66	-0.02	0.02	0.3	-0.04	0.03	0.17	-0.09	0.03	0.0014	-0.04	0.01	0.0027	-0.02	0.02	0.39	-0.06	0.02	0.0019	-0.02	0.02	0.23	-0.06	0.02	0.0021	0.00011	4.1e-06	-1.28	0.79	0.11	-1.51	0.69	0.029	-0.61	1.31	0.64
Energy	TCA Cycle	2-methylcitrate/homocitrate	52282				LC/MS Neg	575	205.035	0.6344	1	-0.03	0.04	0.46	0.05	0.03	0.13	-0.05	0.03	0.11	-0.03	0.04	0.44	-0.01	0.02	0.61	-0.04	0.02	0.078	0.01	0.02	0.57	0.02	0.02	0.43	-0.04	0.02	0.11	3.7e-07	1.1e-06	-0.24	1.47	0.87	-1.09	0.89	0.22	-0.64	1.47	0.67
Energy	TCA Cycle	Aconitate [cis or trans]	46173				LC/MS Neg	580	173.009	0	1	0	0.04	0.97	-0.07	0.03	0.039	-0.05	0.04	0.27	-0.16	0.05	0.00069	-0.07	0.02	0.00026	-0.03	0.03	0.31	-0.1	0.03	0.00013	-0.05	0.03	0.065	-0.1	0.03	0.0012	6.1e-05	1.2e-06	-2.46	1.47	0.096	-1.06	0.93	0.25	-1.1	1.78	0.54
Energy	TCA Cycle	Alpha-ketoglutarate	528	51	C00026	HMDB00208	LC/MS Polar	2700	145.014	0	1	-0.05	0.03	0.17	-0.05	0.03	0.057	-0.07	0.03	0.023	-0.04	0.03	0.13	-0.06	0.01	6.2e-05	-0.07	0.02	0.0014	-0.04	0.02	0.017	-0.05	0.02	0.014	-0.06	0.02	0.0031	3.5e-07	1.2e-08	-1.57	1.24	0.21	-1.11	0.77	0.15	-1.24	1.4	0.38
Energy	TCA Cycle	Citrate	1564	311	C00158	HMDB00094	LC/MS Neg	582	191.02	0	1	0.02	0.04	0.69	0.03	0.03	0.41	0.01	0.07	0.89	-0.02	0.05	0.69	0	0.02	0.99	0	0.04	0.92	0	0.03	0.94	0.02	0.03	0.38	-0.02	0.04	0.62	2.1e-06	2.1e-07	-0.73	1.5	0.63	1.03	0.94	0.27	-0.4	2.82	0.89
Energy	TCA Cycle	Fumarate	1643	444972	C00122	HMDB00134	LC/MS Polar	3084	115.004	0	1	-0.03	0.03	0.4	-0.03	0.03	0.4	-0.08	0.03	0.0058	-0.05	0.04	0.19	-0.06	0.02	9.4e-05	-0.07	0.02	0.00039	-0.04	0.03	0.091	-0.03	0.02	0.22	-0.08	0.02	0.00071	7.5e-06	4e-07	-2.84	1.19	0.018	-1	0.94	0.29	-1.7	1.18	0.15
Energy	TCA Cycle	Malate	1303	525	C00149	HMDB00156	LC/MS Neg	615.6	133.014	0	1	-0.01	0.03	0.82	-0.07	0.03	0.017	-0.07	0.03	0.0086	-0.07	0.03	0.045	-0.06	0.01	5.6e-06	-0.06	0.02	0.0022	-0.07	0.02	0.0012	-0.04	0.02	0.053	-0.08	0.02	0.00026	5.1e-05	3.7e-07	-1.91	1	0.056	-0.71	0.78	0.36	-1.79	1.17	0.13
Energy	TCA Cycle	Succinate	1437	1110	C00042	HMDB00254	LC/MS Polar	3149	117.019	0	1	-0.04	0.04	0.3	0.05	0.04	0.16	-0.1	0.03	0.002	-0.08	0.04	0.065	-0.06	0.02	0.00094	-0.09	0.02	0.0001	-0.02	0.03	0.51	0.01	0.03	0.67	-0.11	0.03	0.00011	4.8e-07	1.2e-05	-1.26	1.43	0.38	-0.45	1.01	0.66	-2.7	1.45	0.064
Energy	TCA Cycle	Succinylcarnitine (C4-DC)	37058	71464481		HMDB61717	LC/MS Pos Early	2291	262.129	0.2379	1	-0.03	0.04	0.46	-0.05	0.03	0.091	-0.01	0.03	0.77	-0.09	0.03	0.0012	-0.05	0.01	0.0015	0	0.02	0.87	-0.07	0.02	0.00027	-0.05	0.02	0.057	-0.06	0.02	0.0051	0.0013	2e-09	1.35	1.4	0.33	-0.19	0.87	0.83	0.09	1.38	0.95
Lipid	Androgenic Steroids	11-ketoetiocholanolone glucuronide	47135				LC/MS Neg	4280	479.229	38.065	1	-0.03	0.01	0.021	0.02	0.01	0.095	-0.01	0.01	0.4	0	0.02	0.82	0	0.01	0.9	-0.01	0.01	0.24	0.01	0.01	0.23	0	0.01	0.93	0	0.01	0.7	4.2e-05	0.00072	-1.2	0.56	0.033	-0.02	0.38	0.95	-0.06	0.32	0.86
Lipid	Androgenic Steroids	16a-hydroxy DHEA 3-sulfate	38168				LC/MS Neg	4240	383.153	0.1586	1	-0.01	0.01	0.53	0	0.01	0.78	-0.02	0.02	0.35	-0.01	0.01	0.16	-0.01	0	0.046	-0.01	0.01	0.27	-0.01	0.01	0.17	0	0.01	0.51	-0.01	0.01	0.051	0.00028	0.0004	-0.49	0.39	0.21	0.4	0.22	0.069	0.17	0.69	0.81
Lipid	Androgenic Steroids	5alpha-androstan-3alpha,17alpha-diol monosulfate	37183				LC/MS Neg	5208	371.19	33.7827	1	0	0.02	0.96	0.03	0.01	0.0051	0	0.03	1	0	0.01	0.74	0.01	0.01	0.067	0	0.02	0.94	0.01	0.01	0.09	0.02	0.01	0.0082	0	0.01	0.89	0.00032	0.013	-0.79	0.75	0.29	0.27	0.31	0.39	-0.61	1.17	0.6
Lipid	Androgenic Steroids	5alpha-androstan-3alpha,17beta-diol 17-glucuronide	47132				LC/MS Neg	4930	467.265	50.0397	1	0	0.03	0.91	0.02	0.02	0.42	0	0.03	0.93	-0.03	0.02	0.22	0	0.01	0.79	0	0.02	0.86	-0.01	0.01	0.54	0.01	0.02	0.59	-0.01	0.02	0.49	3.2e-05	0.0014	-0.52	1.01	0.61	0.48	0.62	0.44	1.16	1.2	0.33
Lipid	Androgenic Steroids	5alpha-androstan-3alpha,17beta-diol disulfate	37184				LC/MS Neg	4275	225.07	34.3378	1	0.01	0.02	0.62	0	0.01	0.84	-0.01	0.01	0.077	-0.01	0	0.086	-0.01	0	0.0025	-0.01	0.01	0.011	-0.01	0	0.068	0	0.01	0.77	-0.01	0	0.0078	0.0018	0.16	-0.33	0.67	0.62	0.13	0.33	0.69	-0.59	0.24	0.014
Lipid	Androgenic Steroids	5alpha-androstan-3alpha,17beta-diol monosulfate (1)	37186				LC/MS Neg	4925	371.19	6.4235	1	0.01	0.01	0.62	0.01	0.01	0.15	0	0.01	0.81	0	0.01	0.99	0.01	0	0.22	0	0.01	0.82	0.01	0.01	0.29	0.01	0.01	0.12	0	0.01	0.78	0.0007	0.00066	-0.42	0.42	0.31	0.13	0.18	0.48	-0.14	0.58	0.82
Lipid	Androgenic Steroids	5alpha-androstan-3alpha,17beta-diol monosulfate (2)	37185				LC/MS Neg	5080	371.19	44.6471	1	0.05	0.03	0.12	0.05	0.03	0.13	0	0.01	0.79	0	0.01	0.79	0	0	0.8	0	0.01	0.61	0	0	0.93	0.05	0.02	0.049	0	0	0.99	0.059	0.85	0.99	1.27	0.43	0.41	0.9	0.65	-0.36	0.33	0.27
Lipid	Androgenic Steroids	5alpha-androstan-3beta,17alpha-diol disulfate	37187				LC/MS Neg	4215	225.07	31.7209	1	0	0.01	0.74	0.02	0.01	0.0085	-0.01	0.01	0.25	-0.01	0.01	0.18	0	0	0.76	-0.01	0.01	0.25	0	0	0.76	0.01	0.01	0.0094	-0.01	0	0.099	0.00038	0.78	-0.43	0.42	0.31	0.18	0.19	0.35	-0.39	0.3	0.19
Lipid	Androgenic Steroids	5alpha-androstan-3beta,17beta-diol disulfate	37190	242332	C12525	HMDB00493	LC/MS Neg	3880	225.07	0.3172	1	0	0.01	0.74	0	0.01	0.97	-0.01	0.01	0.091	-0.01	0.01	0.12	-0.01	0	0.012	-0.01	0	0.022	-0.01	0	0.15	0	0	0.88	-0.01	0	0.02	0.00028	0.021	-0.53	0.36	0.14	0.01	0.16	0.96	-0.16	0.26	0.55
Lipid	Androgenic Steroids	5alpha-androstan-3beta,17beta-diol monosulfate (1)	37191				LC/MS Neg	4635	371.19	82.3949	1	.	.	.	.	.	.	.	.	.	.	.	.	.	.	.	.	.	.	.	.	.	.	.	.	.	.	.	.	.	.	.	.	.	.	.	.	.	.
Lipid	Androgenic Steroids	5alpha-androstan-3beta,17beta-diol monosulfate (2)	37192				LC/MS Neg	4685	371.19	15.4639	1	0	0.01	0.77	0.01	0.01	0.12	-0.01	0.01	0.3	0	0.01	0.7	0	0	0.95	-0.01	0.01	0.35	0	0.01	0.59	0.01	0.01	0.13	0	0.01	0.52	7.9e-05	0.027	-0.5	0.49	0.3	0.3	0.25	0.22	-0.09	0.4	0.82
Lipid	Androgenic Steroids	Andro steroid monosulfate C19H28O6S (1)*	32827		C04555	HMDB02759	LC/MS Neg	3871	383.153	2.6963	2	-0.01	0.01	0.35	0	0.01	0.81	-0.02	0.02	0.24	-0.01	0.01	0.091	-0.01	0	0.013	-0.02	0.01	0.082	-0.01	0.01	0.092	-0.01	0.01	0.43	-0.02	0.01	0.023	9.4e-05	0.00033	-0.67	0.44	0.12	0.52	0.25	0.041	0.2	0.63	0.76
Lipid	Androgenic Steroids	Androstenediol (3alpha, 17alpha) monosulfate (2)	37207				LC/MS Neg	4712	369.174	1.7446	1	0.01	0.02	0.78	0.03	0.01	0.013	0.02	0.03	0.53	0	0.02	0.85	0.02	0.01	0.073	0.01	0.02	0.51	0.02	0.01	0.1	0.02	0.01	0.022	0.01	0.02	0.66	4.1e-05	0.00021	-0.98	0.74	0.18	0.62	0.36	0.087	-0.25	1.15	0.83
Lipid	Androgenic Steroids	Androstenediol (3alpha, 17alpha) monosulfate (3)	37209				LC/MS Neg	5180	369.174	0.3965	1	0.01	0.02	0.51	0.02	0.01	0.13	0	0.02	0.9	-0.02	0.01	0.14	0	0.01	0.66	0	0.01	0.99	-0.01	0.01	0.5	0.02	0.01	0.085	-0.01	0.01	0.26	0.0002	0.0032	-1.22	0.82	0.14	0.31	0.38	0.41	0.41	0.87	0.63
Lipid	Androgenic Steroids	Androstenediol (3beta,17beta) disulfate (1)	37202	87120982	C04295	HMDB03818	LC/MS Neg	3740	224.062	0	1	0	0.01	0.78	0	0.01	0.8	-0.01	0.01	0.14	-0.01	0.01	0.13	-0.01	0	0.017	-0.01	0	0.086	-0.01	0	0.13	0	0	0.84	-0.01	0	0.025	0.0024	0.02	-0.65	0.35	0.063	0.06	0.15	0.69	-0.01	0.23	0.97
Lipid	Androgenic Steroids	Androstenediol (3beta,17beta) disulfate (2)	37203	87120982	C04295	HMDB03818	LC/MS Neg	4065	224.062	0	1	0.01	0.03	0.79	0.03	0.02	0.039	-0.05	0.03	0.082	-0.03	0.02	0.2	-0.01	0.01	0.48	-0.03	0.02	0.11	0	0.01	0.83	0.03	0.01	0.061	-0.03	0.02	0.038	9.8e-07	0.00066	-1.99	0.98	0.043	1.01	0.47	0.034	-1.61	1.23	0.19
Lipid	Androgenic Steroids	Androstenediol (3beta,17beta) monosulfate (1)	37211	13847309		HMDB03818	LC/MS Neg	4535	369.174	0.1586	1	0.01	0.01	0.34	0.01	0.01	0.15	-0.02	0.01	0.15	0	0.01	0.99	0	0.01	0.81	-0.01	0.01	0.48	0.01	0.01	0.39	0.01	0.01	0.1	-0.01	0.01	0.45	1.8e-05	0.0045	-0.52	0.51	0.31	0.48	0.28	0.084	-0.02	0.48	0.97
Lipid	Androgenic Steroids	Androstenediol (3beta,17beta) monosulfate (2)	37210				LC/MS Neg	4500	369.174	0.7137	1	0.01	0.01	0.56	0.01	0.01	0.33	-0.02	0.01	0.13	-0.01	0.01	0.57	0	0	0.75	-0.01	0.01	0.21	0	0.01	0.63	0.01	0	0.29	-0.01	0.01	0.13	1e-05	0.019	-0.71	0.4	0.082	0.21	0.16	0.18	0.02	0.46	0.97
Lipid	Androgenic Steroids	Androsterone glucuronide	61846	114833	C11135	HMDB02829	LC/MS Neg	4953	465.249	0.9516	1	0.01	0.02	0.49	0.03	0.01	0.004	0	0	0.89	-0.01	0.01	0.33	0	0	0.29	0	0	0.63	0	0.01	0.5	0.02	0.01	0.0062	0	0	0.89	0.0041	0.1	-0.28	0.63	0.66	0.45	0.3	0.14	0.03	0.21	0.89
Lipid	Androgenic Steroids	Androsterone sulfate	31591	159663		HMDB02759	LC/MS Neg	5022	369.174	0.0793	1	0.02	0.01	0.31	0.03	0.01	0.00033	0.01	0.02	0.82	0.01	0.01	0.56	0.02	0.01	0.0011	0.01	0.01	0.29	0.02	0.01	0.0052	0.03	0.01	0.00016	0.01	0.01	0.3	0.00015	0.0028	-0.6	0.58	0.3	0.41	0.28	0.14	0.38	0.94	0.68
Lipid	Androgenic Steroids	Dehydroisoandrosterone sulfate (DHEA-S)	32425	12594	C04555	HMDB01032	LC/MS Neg	4745	367.158	0	1	0.04	0.02	0.055	0.06	0.02	0.00036	-0.03	0.02	0.21	0.02	0.02	0.39	0.02	0.01	0.0084	0	0.02	0.75	0.03	0.01	0.0058	0.05	0.01	5.8e-05	0.01	0.01	0.69	7.5e-07	0.013	-1.33	0.88	0.13	1.32	0.46	0.0042	0.38	0.91	0.67
Lipid	Androgenic Steroids	Epiandrosterone sulfate	33973	9929317			LC/MS Neg	4855	369.174	0.3965	1	0.01	0.02	0.41	0.03	0.01	0.00065	-0.01	0.02	0.36	0.01	0.01	0.49	0.02	0.01	0.01	0	0.01	0.86	0.02	0.01	0.0074	0.03	0.01	0.00028	0.01	0.01	0.58	3e-06	0.027	-0.72	0.66	0.28	0.51	0.27	0.061	0.41	0.65	0.53
Lipid	Androgenic Steroids	Etiocholanolone glucuronide	47112	270605		HMDB04484	LC/MS Neg	4915	465.249	1.9033	1	0.01	0.02	0.47	0.04	0.01	0.00038	-0.01	0.01	0.29	0	0.01	0.69	0.01	0.01	0.065	0	0.01	0.64	0.02	0.01	0.0093	0.03	0.01	0.00049	0	0.01	1	3.2e-07	0.031	-1.01	0.64	0.12	0.57	0.29	0.053	-0.2	0.43	0.65
Lipid	Androgenic Steroids	Testosterone sulfate	35668	119207		HMDB02833	LC/MS Neg	4600	367.158	81.9191	1	.	.	.	.	.	.	.	.	.	.	.	.	.	.	.	.	.	.	.	.	.	.	.	.	.	.	.	.	.	.	.	.	.	.	.	.	.	.
Lipid	Carnitine Metabolism	Carnitine	15500	10917	C00318	HMDB00062	LC/MS Pos Early	1978	162.112	0	1	-0.02	0.07	0.81	0.06	0.06	0.31	-0.08	0.08	0.33	-0.04	0.07	0.63	-0.02	0.03	0.48	-0.07	0.05	0.22	0.01	0.04	0.89	0.03	0.05	0.56	-0.07	0.05	0.22	3.3e-07	5.6e-08	0.38	2.67	0.89	3.02	1.63	0.065	-2.5	3.48	0.47
Lipid	Carnitine Metabolism	Deoxycarnitine	36747	134	C01181	HMDB01161	LC/MS Pos Early	2052	146.118	0	1	-0.09	0.05	0.077	0.06	0.04	0.2	-0.01	0.06	0.84	0	0.05	0.99	-0.02	0.03	0.52	-0.07	0.04	0.11	0.02	0.03	0.54	0	0.03	0.9	-0.01	0.04	0.74	1.5e-07	1.7e-07	1.12	1.76	0.52	2.19	1.21	0.071	-1.11	2.82	0.69
Lipid	Ceramides	Ceramide (d16:1/24:1, d18:1/22:1)*	57437				LC/MS Pos Late	3850	620.598	40.7613	2	.	.	.	.	.	.	.	.	.	.	.	.	.	.	.	.	.	.	.	.	.	.	.	.	.	.	.	.	.	.	.	.	.	.	.	.	.	.
Lipid	Ceramides	Ceramide (d18:1/14:0, d16:1/16:0)*	57432				LC/MS Pos Late	2477	510.488	23.3941	2	0.04	0.03	0.13	0	0.02	0.93	0	0.04	0.95	0.04	0.02	0.085	0.02	0.01	0.061	0.03	0.02	0.15	0.02	0.01	0.23	0.01	0.01	0.5	0.03	0.02	0.081	0.0034	2e-08	0.03	0.94	0.98	0.35	0.45	0.43	3.24	1.76	0.068
Lipid	Ceramides	Ceramide (d18:1/20:0, d16:1/22:0, d20:1/18:0)*	57440				LC/MS Pos Late	3920	594.582	22.9976	2	.	.	.	.	.	.	.	.	.	.	.	.	.	.	.	.	.	.	.	.	.	.	.	.	.	.	.	.	.	.	.	.	.	.	.	.	.	.
Lipid	Ceramides	Ceramide (d18:2/24:1, d18:1/24:2)*	57443				LC/MS Pos Late	3858	646.613	0	2	-0.06	0.03	0.04	0.02	0.02	0.43	-0.02	0.04	0.59	0	0.03	0.93	-0.01	0.01	0.49	-0.04	0.02	0.065	0.01	0.02	0.58	-0.01	0.02	0.51	-0.01	0.02	0.72	1.3e-07	1.6e-07	-1.57	1.01	0.12	-0.27	0.68	0.69	1.41	1.77	0.43
Lipid	Ceramides	Glycosyl ceramide (d18:1/20:0, d16:1/22:0)*	57595				LC/MS Pos Late	3414	756.635	0	2	0.02	0.04	0.52	0.04	0.03	0.14	0.05	0.06	0.39	0.04	0.03	0.23	0.04	0.02	0.022	0.03	0.03	0.34	0.04	0.02	0.048	0.04	0.02	0.099	0.04	0.03	0.13	1.3e-05	1.7e-08	0.65	1.37	0.64	-0.84	0.77	0.28	1.13	2.42	0.64
Lipid	Ceramides	Glycosyl ceramide (d18:2/24:1, d18:1/24:2)*	57453				LC/MS Pos Late	3380	808.666	0.0793	2	-0.03	0.02	0.23	-0.01	0.02	0.55	-0.05	0.04	0.29	-0.03	0.03	0.3	-0.03	0.01	0.057	-0.04	0.02	0.07	-0.02	0.02	0.25	-0.02	0.02	0.26	-0.04	0.02	0.16	3.8e-06	1.3e-05	-1.48	0.97	0.13	-1.25	0.61	0.042	-2.7	1.8	0.14
Lipid	Ceramides	Glycosyl-N-(2-hydroxynervonoyl)-sphingosine (d18:1/24:1(2	57444				LC/MS Pos Late	3839	826.677	7.0579	2	0	0.01	0.78	-0.01	0.01	0.56	-0.01	0.02	0.64	-0.04	0.02	0.032	-0.01	0.01	0.054	-0.01	0.01	0.61	-0.02	0.01	0.056	-0.01	0.01	0.48	-0.03	0.02	0.037	0.0026	0.0019	0.17	0.47	0.72	-0.52	0.35	0.14	-0.69	0.96	0.47
Lipid	Ceramides	Glycosyl-N-behenoyl-sphingadienine (d18:2/22:0)*	57421				LC/MS Pos Late	3420	782.65	0	2	0	0.03	0.99	0.03	0.02	0.18	0.06	0.05	0.22	0.03	0.03	0.39	0.03	0.02	0.064	0.02	0.03	0.45	0.03	0.02	0.11	0.02	0.02	0.27	0.04	0.03	0.13	4.3e-06	1.2e-08	-0.46	1.17	0.69	-0.76	0.69	0.27	0.23	2.11	0.91
Lipid	Ceramides	Glycosyl-N-palmitoyl-sphingosine (d18:1/16:0)	53013				LC/MS Pos Late	2623	700.572	0	1	0.01	0.03	0.79	-0.04	0.03	0.15	-0.04	0.05	0.5	-0.05	0.03	0.13	-0.03	0.02	0.045	-0.01	0.03	0.77	-0.04	0.02	0.031	-0.02	0.02	0.3	-0.04	0.03	0.12	2.2e-05	3.8e-07	-1.32	1.21	0.28	-1.28	0.75	0.089	-1.2	2.2	0.59
Lipid	Ceramides	Glycosyl-N-stearoyl-sphingosine (d18:1/18:0)	52234				LC/MS Pos Late	3053	728.604	0	1	-0.01	0.03	0.73	-0.02	0.02	0.49	0	0.05	0.98	0	0.03	0.97	-0.01	0.01	0.52	-0.01	0.02	0.66	-0.01	0.02	0.66	-0.01	0.02	0.4	0	0.03	0.99	3.1e-06	1.5e-07	0.55	1.05	0.6	-1.22	0.65	0.06	-0.03	2.24	0.99
Lipid	Ceramides	Lactosyl-N-nervonoyl-sphingosine (d18:1/24:1)*	57370				LC/MS Pos Late	3778	972.735	0	2	-0.01	0.03	0.7	0.03	0.03	0.17	-0.03	0.05	0.55	0.02	0.03	0.63	0.01	0.02	0.57	-0.03	0.03	0.27	0.02	0.02	0.23	0.02	0.02	0.3	0	0.03	0.99	2.6e-07	8.6e-07	-0.86	1.33	0.52	-0.14	0.7	0.84	-3.77	2.06	0.069
Lipid	Ceramides	Lactosyl-N-palmitoyl-sphingosine (d18:1/16:0)	53010				LC/MS Pos Late	2527	862.625	0	1	0	0.03	0.89	0.03	0.03	0.23	-0.08	0.05	0.077	0.01	0.04	0.84	0	0.02	0.8	-0.03	0.03	0.23	0.02	0.02	0.32	0.02	0.02	0.23	-0.02	0.03	0.44	4.2e-07	1.2e-06	-1.14	1.21	0.35	1.64	0.72	0.023	-0.23	2.23	0.92
Lipid	Ceramides	N-palmitoyl-sphingosine (d18:1/16:0)	44877	5283564		HMDB04949	LC/MS Pos Late	2893	538.519	0	1	-0.08	0.04	0.062	-0.05	0.03	0.13	-0.08	0.06	0.19	-0.05	0.04	0.19	-0.06	0.02	0.0033	-0.07	0.03	0.037	-0.05	0.03	0.047	-0.06	0.02	0.021	-0.06	0.03	0.061	2.2e-07	3.6e-08	-2.27	1.51	0.14	-1.45	0.9	0.11	0.24	2.65	0.93
Lipid	Ceramides	N-stearoyl-sphingadienine (d18:2/18:0)*	57417				LC/MS Pos Late	2846	564.535	23.3941	2	-0.04	0.01	0.0055	0	0.01	0.75	-0.03	0.03	0.17	0	0.02	0.83	-0.01	0.01	0.17	-0.04	0.01	0.0065	0	0.01	0.74	-0.01	0.01	0.18	-0.01	0.02	0.56	7.9e-07	2.2e-06	-0.7	0.58	0.23	-0.25	0.36	0.49	0.71	1.08	0.51
Lipid	Ceramides	N-stearoyl-sphingosine (d18:1/18:0)*	54979	5283565		HMDB04950	LC/MS Pos Late	3392	566.551	0	2	-0.06	0.02	0.017	-0.03	0.02	0.076	-0.05	0.03	0.16	0	0.03	0.96	-0.03	0.01	0.018	-0.05	0.02	0.023	-0.02	0.02	0.21	-0.04	0.02	0.0046	-0.01	0.02	0.5	2e-06	6.5e-09	-1.27	0.89	0.15	-0.75	0.56	0.18	2.09	1.52	0.17
Lipid	Corticosteroids	Corticosterone	5983	5753	C02140	HMDB01547	LC/MS Neg	5040	345.207	18.636	1	0	0.01	0.62	0.01	0.01	0.058	0	0.02	0.83	0.01	0.01	0.51	0.01	0.01	0.27	-0.01	0.01	0.43	0.01	0.01	0.057	0.01	0.01	0.17	0	0.01	0.86	1.5e-06	0.0018	-0.33	0.37	0.38	0.05	0.22	0.81	0.58	0.72	0.43
Lipid	Corticosteroids	Cortisol	1712	5754	C00735	HMDB00063	LC/MS Neg	4710	361.202	0.5551	1	-0.02	0.03	0.52	0	0.02	0.94	0.06	0.05	0.22	0	0.04	0.95	0	0.01	0.93	0	0.02	0.84	0	0.02	0.84	0	0.01	0.79	0	0.03	0.87	1.2e-06	3.7e-07	-0.41	1.02	0.69	-0.58	0.51	0.26	2.64	2.04	0.2
Lipid	Corticosteroids	Cortisone	1769	222786	C00762	HMDB02802	LC/MS Neg	4575	359.186	2.1412	1	0	0.04	0.95	-0.01	0.03	0.66	-0.02	0.07	0.77	-0.02	0.04	0.64	-0.01	0.02	0.46	0	0.03	0.96	-0.01	0.02	0.55	-0.01	0.02	0.62	-0.02	0.03	0.47	2.2e-06	1.8e-07	-0.39	1.47	0.79	0.2	0.78	0.8	0.26	2.85	0.93
Lipid	Diacylglycerol	Linoleoyl-arachidonoyl-glycerol (18:2/20:4) [1]*	54955			HMDB07257	LC/MS Pos Late	2566	658.541	10.8644	2	0	0.01	0.95	-0.02	0.01	0.026	0.01	0.02	0.45	0	0.01	0.79	-0.01	0.01	0.31	0.01	0.01	0.35	-0.01	0.01	0.1	-0.02	0.01	0.044	0	0.01	0.85	0.0086	8.4e-08	0.51	0.56	0.37	-0.37	0.27	0.16	0.43	0.65	0.5
Lipid	Diacylglycerol	Linoleoyl-arachidonoyl-glycerol (18:2/20:4) [2]*	54956			HMDB07257	LC/MS Pos Late	2624	658.541	32.8311	2	0	0.01	0.74	-0.01	0.01	0.091	0.01	0.01	0.56	0	0.01	0.85	0	0.01	0.54	0.01	0.01	0.38	-0.01	0.01	0.22	-0.01	0.01	0.17	0	0.01	0.84	0.041	5.4e-06	0.6	0.48	0.21	-0.34	0.24	0.16	-0.02	0.62	0.97
Lipid	Diacylglycerol	Linoleoyl-linoleoyl-glycerol (18:2/18:2) [1]*	54968			HMDB07248	LC/MS Pos Late	2689	634.541	0	2	0	0.02	0.84	-0.01	0.01	0.24	0.01	0.02	0.57	-0.01	0.01	0.65	0	0.01	0.57	0.02	0.02	0.29	-0.01	0.01	0.31	-0.01	0.01	0.28	0	0.01	0.92	0.0015	2.4e-07	-0.25	0.71	0.72	0.11	0.32	0.72	1.66	1.03	0.11
Lipid	Diacylglycerol	Oleoyl-arachidonoyl-glycerol (18:1/20:4) [1]*	54960			HMDB07228	LC/MS Pos Late	2907	660.556	21.0151	2	0	0.01	0.77	-0.02	0.01	0.0049	0.01	0.01	0.4	0	0.01	0.76	-0.01	0	0.13	0.01	0.01	0.51	-0.01	0.01	0.051	-0.02	0.01	0.005	0	0.01	0.93	0.032	6.2e-08	0.26	0.5	0.61	-0.59	0.24	0.015	0.32	0.49	0.51
Lipid	Diacylglycerol	Oleoyl-arachidonoyl-glycerol (18:1/20:4) [2]*	54961			HMDB07228	LC/MS Pos Late	2990	660.556	37.7478	2	-0.01	0.01	0.31	-0.02	0.01	0.0073	0.01	0.01	0.45	-0.01	0.01	0.46	-0.01	0	0.062	0	0.01	0.92	-0.01	0.01	0.033	-0.02	0.01	0.003	0	0.01	0.75	0.082	9.8e-07	0.11	0.49	0.82	-0.59	0.26	0.022	0.22	0.49	0.65
Lipid	Diacylglycerol	Oleoyl-linoleoyl-glycerol (18:1/18:2) [1]	46798			HMDB07219	LC/MS Pos Late	3115	636.556	1.2688	1	0	0.02	1	-0.01	0.01	0.21	0.01	0.02	0.81	-0.01	0.01	0.62	-0.01	0.01	0.28	0.01	0.01	0.6	-0.01	0.01	0.23	-0.01	0.01	0.2	0	0.01	0.67	0.0011	1.5e-06	-0.78	0.6	0.2	-0.26	0.2	0.2	1.22	0.97	0.21
Lipid	Diacylglycerol	Oleoyl-linoleoyl-glycerol (18:1/18:2) [2]	46799			HMDB07219	LC/MS Pos Late	3223	636.556	1.4274	1	-0.01	0.02	0.7	-0.01	0.01	0.19	0	0.02	0.94	-0.01	0.01	0.37	-0.01	0.01	0.14	0	0.01	0.86	-0.01	0.01	0.13	-0.01	0.01	0.14	-0.01	0.01	0.38	0.0007	4.9e-06	-0.89	0.56	0.11	-0.25	0.19	0.19	1.31	0.92	0.16
Lipid	Diacylglycerol	Oleoyl-oleoyl-glycerol (18:1/18:1) [2]*	54946			HMDB07218	LC/MS Pos Late	3695	638.572	63.521	2	0	0.02	0.84	-0.03	0.01	0.0096	0.02	0.02	0.38	-0.02	0.02	0.24	-0.02	0.01	0.039	0.01	0.01	0.44	-0.02	0.01	0.0087	-0.02	0.01	0.024	-0.01	0.01	0.4	0.0003	1.8e-08	-0.22	0.67	0.75	-0.44	0.33	0.18	0.63	1.02	0.54
Lipid	Diacylglycerol	Palmitoleoyl-linoleoyl-glycerol (16:1/18:2) [1]*	54967			HMDB07132	LC/MS Pos Late	2664	608.525	8.6439	2	0	0.02	0.78	-0.02	0.01	0.026	0	0.02	0.86	-0.01	0.01	0.34	-0.01	0.01	0.017	0	0.01	0.81	-0.01	0.01	0.03	-0.01	0.01	0.017	-0.01	0.01	0.27	0.0015	4.9e-06	-0.47	0.58	0.41	-0.31	0.2	0.12	0.66	0.78	0.4
Lipid	Diacylglycerol	Palmitoyl-linoleoyl-glycerol (16:0/18:2) [1]*	52633	9543695		HMDB07103	LC/MS Pos Late	3080	610.541	69.3101	2	0.01	0.02	0.57	-0.03	0.01	0.037	0.02	0.03	0.41	-0.01	0.02	0.65	-0.01	0.01	0.38	0.02	0.01	0.25	-0.02	0.01	0.094	-0.01	0.01	0.17	0	0.01	0.97	0.00068	1.7e-08	-1.12	0.61	0.065	-0.07	0.38	0.86	0.36	1.06	0.73
Lipid	Diacylglycerol	Palmitoyl-linoleoyl-glycerol (16:0/18:2) [2]*	52634			HMDB07103	LC/MS Pos Late	3197	610.541	74.2268	2	0.01	0.02	0.67	-0.03	0.01	0.034	0.01	0.03	0.87	-0.01	0.02	0.75	-0.01	0.01	0.26	0.01	0.02	0.53	-0.02	0.01	0.1	-0.02	0.01	0.13	0	0.01	0.8	0.00027	1.9e-08	0.16	0.67	0.82	-0.15	0.39	0.7	1.67	1.3	0.2
Lipid	Eicosanoid	12-HETE	37536	5312983		HMDB06111	LC/MS Neg	5326	319.228	2.6963	1	0	0.01	0.83	0	0	0.7	0	0.01	0.6	0	0	0.82	0	0	0.57	0	0	0.29	0	0	0.94	0	0	0.72	0	0	0.68	0.057	0.00081	-0.1	0.24	0.69	-0.05	0.09	0.57	-0.03	0.23	0.9
Lipid	Eicosanoid	12-HHTrE	57393	5283141	C20388	HMDB12535	LC/MS Neg	5175	279.197	26.8041	1	0	0.01	0.41	0.01	0	0.071	0	0.01	0.55	0	0.01	0.91	0.01	0	0.05	0.01	0	0.26	0	0	0.15	0.01	0	0.043	0	0	0.47	0.018	0.01	-0.11	0.22	0.62	0.02	0.11	0.84	-0.36	0.31	0.25
Lipid	Eicosanoid	Thromboxane B2	17807	5283137	C05963	HMDB03252	LC/MS Neg	4526	369.228	60.904	1	0.03	0.01	0.053	0.01	0.01	0.24	0.02	0.02	0.36	0.01	0.02	0.4	0.02	0.01	0.018	0.03	0.01	0.031	0.01	0.01	0.18	0.02	0.01	0.039	0.02	0.01	0.17	9.4e-05	4.3e-07	-0.27	0.56	0.63	0.02	0.34	0.96	-0.86	0.92	0.35
Lipid	Endocannabinoid	Linoleoyl ethanolamide	52608	5283446		HMDB12252	LC/MS Neg	6150	322.275	0.4758	1	0.03	0.03	0.35	0.04	0.02	0.11	-0.05	0.04	0.27	0.03	0.04	0.41	0.02	0.02	0.19	0	0.02	0.97	0.03	0.02	0.085	0.03	0.02	0.069	0	0.03	0.98	9.2e-07	1.2e-07	0.5	1.03	0.62	0.96	0.64	0.13	-1.5	1.68	0.37
Lipid	Endocannabinoid	N-linoleoyltaurine*	61826				LC/MS Neg	5505	386.237	31.483	2	0.02	0.02	0.37	0.04	0.02	0.019	-0.01	0.03	0.66	0.01	0.02	0.72	0.02	0.01	0.081	0.01	0.02	0.6	0.03	0.01	0.056	0.03	0.01	0.025	0	0.02	0.85	8.2e-06	5.7e-05	-0.04	0.76	0.96	0.45	0.45	0.32	-2.08	1.15	0.074
Lipid	Endocannabinoid	N-oleoylserine	57664				LC/MS Neg	5600	368.281	1.6653	1	-0.02	0.03	0.63	0.02	0.03	0.47	-0.04	0.06	0.51	0.01	0.04	0.74	0	0.02	0.9	-0.03	0.03	0.21	0.02	0.02	0.47	0.01	0.02	0.73	-0.01	0.03	0.7	1.6e-07	4.3e-07	-0.74	1.21	0.54	-0.7	0.74	0.34	-4.48	2.1	0.035
Lipid	Endocannabinoid	N-oleoyltaurine	39732	6437033			LC/MS Neg	5610	388.253	5.1546	1	0	0.02	0.97	0.02	0.02	0.34	-0.08	0.04	0.032	-0.02	0.03	0.44	-0.01	0.01	0.29	-0.03	0.02	0.1	0	0.01	1	0.01	0.01	0.5	-0.04	0.02	0.057	7.9e-07	5.5e-05	-0.24	0.88	0.78	-0.22	0.46	0.64	-1.38	1.35	0.31
Lipid	Endocannabinoid	N-palmitoylserine	57659	6453686			LC/MS Neg	5557	342.265	60.6661	1	0.01	0.01	0.41	0	0.01	0.92	0.04	0.02	0.11	0	0.02	0.91	0	0.01	0.6	0.01	0.01	0.3	0	0.01	0.98	0.01	0.01	0.52	0.01	0.01	0.62	2.6e-05	1.6e-06	0.15	0.58	0.8	0	0.36	1	0.16	1	0.87
Lipid	Endocannabinoid	N-stearoylserine*	61822				LC/MS Neg	5777	370.296	30.2934	2	0	0.02	0.96	0.02	0.02	0.27	-0.03	0.04	0.35	0.07	0.03	0.012	0.02	0.01	0.06	-0.01	0.02	0.66	0.03	0.01	0.014	0.01	0.01	0.33	0.04	0.02	0.076	1.3e-07	1.4e-07	-0.02	0.63	0.98	0.39	0.43	0.37	-0.16	1.43	0.91
Lipid	Endocannabinoid	N-stearoyltaurine	39730	168274			LC/MS Neg	5782	390.268	20.5393	1	-0.04	0.02	0.12	0.02	0.02	0.1	-0.02	0.04	0.6	0.04	0.03	0.18	0.01	0.01	0.42	-0.03	0.02	0.15	0.03	0.01	0.052	0.01	0.01	0.54	0.02	0.02	0.44	5.1e-08	2.4e-07	-1.88	0.93	0.044	0.3	0.43	0.49	-0.79	1.53	0.61
Lipid	Endocannabinoid	Oleoyl ethanolamide	38102	5283454		HMDB02088	LC/MS Neg	6450	324.291	0	1	0.01	0.03	0.83	0.01	0.03	0.84	-0.1	0.05	0.042	-0.03	0.04	0.42	-0.02	0.02	0.2	-0.04	0.03	0.16	-0.01	0.02	0.61	0	0.02	0.83	-0.06	0.03	0.052	1.9e-06	1.4e-06	-0.93	1.26	0.46	-0.73	0.73	0.32	-1.56	1.94	0.42
Lipid	Estrogenic Steroids	Estrone 3-sulfate	18474	3001028	C02538	HMDB01425	LC/MS Neg	4417.3	349.112	71.6098	1	0.02	0.02	0.32	0	0.01	0.92	-0.02	0.03	0.42	0.02	0.02	0.39	0.01	0.01	0.31	0.01	0.01	0.33	0.01	0.01	0.59	0	0.01	0.67	0.01	0.02	0.59	3.5e-05	2.7e-08	0.18	0.59	0.76	-0.04	0.33	0.91	-0.68	1.16	0.56
Lipid	Fatty Acid Metabolism (Acyl Choline)	Arachidonoylcholine	53261				LC/MS Pos Late	1390	390.337	0	1	0.01	0.02	0.56	0.01	0.02	0.65	0	0.03	0.97	0.03	0.02	0.29	0.01	0.01	0.29	0.01	0.01	0.61	0.01	0.01	0.31	0.01	0.01	0.45	0.01	0.02	0.52	2.4e-06	1.2e-06	0.2	0.68	0.77	0.3	0.51	0.56	-0.16	1.12	0.89
Lipid	Fatty Acid Metabolism (Acyl Choline)	Dihomo-linolenoyl-choline	53262				LC/MS Pos Late	1424	392.352	7.613	1	0.02	0.02	0.29	-0.01	0.01	0.42	-0.01	0.03	0.78	0.02	0.02	0.15	0	0.01	0.62	0.01	0.01	0.58	0	0.01	0.75	0	0.01	0.85	0.01	0.01	0.32	0.00016	5.6e-07	0	0.6	1	0	0.29	0.99	-1.03	1.13	0.36
Lipid	Fatty Acid Metabolism (Acyl Choline)	Docosahexaenoylcholine	53263				LC/MS Pos Late	1378	414.337	7.613	1	0.03	0.02	0.11	0.02	0.01	0.14	0.01	0.03	0.79	0.02	0.02	0.37	0.02	0.01	0.023	0.02	0.01	0.11	0.02	0.01	0.089	0.02	0.01	0.033	0.01	0.01	0.43	1.4e-05	1.1e-05	0.67	0.61	0.27	0.41	0.36	0.26	0.07	1.09	0.95
Lipid	Fatty Acid Metabolism (Acyl Choline)	Eicosapentaenoylcholine	53258				LC/MS Pos Late	1343	388.321	61.8557	1	0	0.01	0.82	0.01	0.01	0.55	0.02	0.02	0.49	0.03	0.02	0.12	0.01	0.01	0.14	0.01	0.01	0.68	0.01	0.01	0.13	0	0.01	0.68	0.02	0.01	0.12	3e-06	1.1e-08	-0.04	0.56	0.94	0.36	0.32	0.26	-0.68	0.98	0.49
Lipid	Fatty Acid Metabolism (Acyl Choline)	Linoleoylcholine*	57463				LC/MS Pos Late	1388	366.337	0.0793	2	0.02	0.02	0.31	0.04	0.02	0.011	0.01	0.03	0.81	0.05	0.02	0.053	0.03	0.01	0.0016	0.01	0.02	0.42	0.04	0.01	0.0017	0.04	0.01	0.0052	0.03	0.02	0.094	5.1e-07	8.2e-07	0.11	0.81	0.89	0.91	0.47	0.051	-1.5	1.34	0.26
Lipid	Fatty Acid Metabolism (Acyl Choline)	Oleoylcholine	53260				LC/MS Pos Late	1449	368.352	0.5551	1	0	0.02	0.93	0.01	0.01	0.68	-0.01	0.02	0.69	0.02	0.02	0.32	0	0.01	0.69	-0.01	0.01	0.61	0.01	0.01	0.34	0	0.01	0.68	0	0.02	0.83	7.5e-07	8.7e-06	-0.33	0.72	0.65	0.18	0.39	0.63	-1.36	1.04	0.19
Lipid	Fatty Acid Metabolism (Acyl Choline)	Palmitoloelycholine	53257				LC/MS Pos Late	1385	340.321	54.322	1	-0.01	0.01	0.53	-0.03	0.01	0.0071	-0.03	0.02	0.15	0.01	0.02	0.75	-0.02	0.01	0.017	-0.02	0.01	0.15	-0.02	0.01	0.082	-0.02	0.01	0.0078	-0.01	0.01	0.46	1.4e-06	3.8e-07	-0.83	0.57	0.14	-0.08	0.31	0.81	-1.19	0.97	0.22
Lipid	Fatty Acid Metabolism (Acyl Choline)	Palmitoylcholine	52944	151731			LC/MS Pos Late	1482	342.337	0	1	0.02	0.02	0.3	0.02	0.02	0.22	-0.01	0.03	0.74	0.03	0.02	0.16	0.02	0.01	0.095	0.01	0.02	0.72	0.03	0.01	0.07	0.02	0.01	0.098	0.01	0.02	0.46	6.2e-07	1.9e-06	0.1	0.82	0.9	0.65	0.49	0.19	-1.18	1.28	0.36
Lipid	Fatty Acid Metabolism (Acyl Choline)	Stearoylcholine*	57464				LC/MS Pos Late	1520	370.368	0.4758	2	0	0.02	0.96	0.01	0.02	0.38	0.01	0.03	0.86	0.04	0.02	0.074	0.02	0.01	0.12	0	0.02	0.88	0.02	0.01	0.063	0.01	0.01	0.44	0.02	0.02	0.16	6.2e-07	1.6e-07	0	0.72	1	0.36	0.45	0.42	-0.93	1.2	0.44
Lipid	Fatty Acid Metabolism (Acyl Glutamine)	Hexanoylglutamine	54907				LC/MS Neg	2780	243.135	2.9342	1	-0.01	0.01	0.2	0	0	0.58	-0.03	0.01	0.0018	-0.03	0.01	0.0024	-0.01	0	0.027	-0.03	0.01	0.00037	0	0	0.4	0	0	0.9	-0.03	0.01	1.2e-05	4.8e-07	0.83	-0.28	0.35	0.42	-0.09	0.1	0.39	-0.85	0.48	0.078
Lipid	Fatty Acid Metabolism (Acyl Glutamine)	N-octanoylglutamine	54919				LC/MS Neg	4164	271.166	99.0484	1	.	.	.	.	.	.	.	.	.	.	.	.	.	.	.	.	.	.	.	.	.	.	.	.	.	.	.	.	.	.	.	.	.	.	.	.	.	.
Lipid	Fatty Acid Metabolism (also BCAA Metabolism)	Butyrylcarnitine (C4)	32412	439829	C02862	HMDB02013	LC/MS Pos Early	2860	232.154	0.3965	1	0.03	0.03	0.37	-0.02	0.01	0.072	-0.08	0.04	0.076	-0.04	0.02	0.021	-0.03	0.01	0.0019	-0.02	0.03	0.43	-0.03	0.01	0.0041	-0.02	0.01	0.11	-0.04	0.01	0.0039	1.8e-06	1.5e-05	-1.1	1.25	0.38	-0.1	0.3	0.72	-0.64	1.83	0.73
Lipid	Fatty Acid Metabolism (also BCAA Metabolism)	Methylmalonate (MMA)	1496	487	C02170	HMDB00202	LC/MS Polar	3078.4	117.019	9.6749	1	-0.1	0.04	0.011	-0.04	0.01	0.0012	0.01	0.03	0.84	-0.01	0.01	0.46	-0.02	0.01	0.0083	-0.02	0.02	0.39	-0.02	0.01	0.017	-0.05	0.01	5.8e-05	-0.01	0.01	0.45	1.5e-05	1e-09	-1.74	1.45	0.23	-1.04	0.35	0.0033	-0.13	1.08	0.91
Lipid	Fatty Acid Metabolism (also BCAA Metabolism)	Propionylcarnitine (C3)	32452	107738	C03017	HMDB00824	LC/MS Pos Early	2590	218.139	0	1	0	0.03	0.97	-0.01	0.03	0.62	-0.04	0.03	0.22	-0.02	0.03	0.63	-0.02	0.02	0.17	-0.02	0.02	0.3	-0.02	0.02	0.44	-0.01	0.02	0.49	-0.03	0.02	0.21	3.7e-06	9.4e-08	-0.85	1.3	0.51	1.01	0.79	0.2	-0.62	1.4	0.66
Lipid	Fatty Acid Metabolism (also BCAA Metabolism)	Propionylglycine	31932	98681		HMDB00783	LC/MS Neg	960	130.051	39.4132	1	0	0.01	0.88	-0.01	0.01	0.22	0.03	0.02	0.24	-0.01	0.02	0.56	0	0.01	0.54	0.01	0.01	0.56	-0.01	0.01	0.18	-0.01	0.01	0.3	0	0.01	0.86	0.011	2.7e-05	-0.12	0.53	0.82	-0.16	0.32	0.61	0.92	1.01	0.36
Lipid	Fatty Acid Metabolism(Acyl Carnitine)	3-hydroxybutyrylcarnitine (1)	43264	53481617		HMDB13127	LC/MS Pos Early	2400	248.149	16.1776	1	0	0.01	0.87	0	0	0.77	-0.03	0.01	0.0073	-0.01	0.01	0.51	-0.01	0	0.045	-0.01	0.01	0.023	0	0	0.49	0	0	0.73	-0.02	0.01	0.014	5.8e-05	0.092	-0.58	0.18	0.0015	-0.13	0.13	0.32	-0.55	0.42	0.19
Lipid	Fatty Acid Metabolism(Acyl Carnitine)	3-hydroxybutyrylcarnitine (2)	52984			HMDB13127	LC/MS Pos Early	2340	248.149	0.2379	1	0.02	0.02	0.28	-0.01	0.01	0.17	-0.07	0.02	0.00019	-0.03	0.02	0.073	-0.03	0.01	0.00051	-0.03	0.01	0.0069	-0.02	0.01	0.036	-0.01	0.01	0.41	-0.05	0.01	2.7e-05	2.5e-06	0.0041	-0.94	0.65	0.15	-0.22	0.26	0.4	-1.15	0.77	0.14
Lipid	Fatty Acid Metabolism(Acyl Carnitine)	Acetylcarnitine (C2)	32198	1	C02571	HMDB00201	LC/MS Pos Early	2282	204.123	0	1	-0.03	0.04	0.52	0	0.03	0.95	-0.1	0.04	0.0072	-0.05	0.04	0.23	-0.05	0.02	0.0051	-0.08	0.03	0.0013	-0.02	0.02	0.39	-0.01	0.02	0.63	-0.08	0.03	0.0028	5.3e-08	2.2e-06	-2.75	1.45	0.059	-0.08	0.8	0.92	-2.75	1.5	0.068
Lipid	Fatty Acid Metabolism(Acyl Carnitine)	Adipoylcarnitine (C6-DC)	52988	71296139		HMDB61677	LC/MS Pos Early	2558	290.16	1.3481	1	-0.04	0.02	0.042	-0.01	0.01	0.39	-0.04	0.02	0.029	-0.03	0.01	0.017	-0.02	0.01	0.00058	-0.04	0.01	0.0023	-0.01	0.01	0.026	-0.01	0.01	0.11	-0.03	0.01	0.0013	4.1e-06	0.00026	-1.56	0.71	0.028	-0.36	0.22	0.1	-0.51	0.75	0.49
Lipid	Fatty Acid Metabolism(Acyl Carnitine)	Arachidonoylcarnitine (C20:4)	57518				LC/MS Pos Late	1353	448.342	12.0539	1	-0.01	0.02	0.69	-0.01	0.02	0.45	-0.01	0.02	0.46	-0.03	0.02	0.19	-0.02	0.01	0.027	-0.02	0.01	0.22	-0.02	0.01	0.1	-0.01	0.01	0.35	-0.03	0.01	0.067	0.00012	4.5e-06	0.66	0.8	0.41	0.73	0.55	0.18	-0.34	0.83	0.68
Lipid	Fatty Acid Metabolism(Acyl Carnitine)	Arachidoylcarnitine (C20)*	57513			HMDB06460	LC/MS Pos Late	1512	456.405	19.9048	2	-0.02	0.02	0.5	0.03	0.02	0.062	0.04	0.04	0.28	0.02	0.02	0.51	0.02	0.01	0.076	0.01	0.02	0.71	0.03	0.01	0.062	0.02	0.01	0.23	0.02	0.02	0.23	4e-06	1.9e-06	-0.83	0.88	0.35	0.24	0.47	0.61	1.7	1.46	0.25
Lipid	Fatty Acid Metabolism(Acyl Carnitine)	Behenoylcarnitine (C22)*	57514				LC/MS Pos Late	1561	484.436	13.8779	2	0.01	0.02	0.46	0.02	0.01	0.046	0.05	0.03	0.1	0	0.02	0.8	0.02	0.01	0.022	0.03	0.01	0.079	0.01	0.01	0.076	0.02	0.01	0.047	0.01	0.01	0.31	0.0014	4.6e-06	-0.1	0.59	0.87	0.22	0.26	0.4	0.99	1.16	0.4
Lipid	Fatty Acid Metabolism(Acyl Carnitine)	Cerotoylcarnitine (C26)*	57516			HMDB06347	LC/MS Pos Late	1649	540.499	0	2	0.02	0.03	0.45	0.08	0.02	0.00085	0.05	0.03	0.12	0.03	0.03	0.2	0.05	0.01	0.00047	0.03	0.02	0.11	0.06	0.02	0.0015	0.06	0.02	0.0015	0.04	0.02	0.075	2.5e-06	0.00013	0.51	1.09	0.64	1.19	0.68	0.08	2.34	1.42	0.1
Lipid	Fatty Acid Metabolism(Acyl Carnitine)	Cis-4-decenoylcarnitine (C10:1)	38178				LC/MS Pos Late	1057	314.233	0	1	-0.01	0.02	0.56	0.02	0.01	0.066	-0.03	0.03	0.36	-0.04	0.02	0.042	-0.01	0.01	0.48	-0.02	0.01	0.24	0	0.01	0.96	0.01	0.01	0.24	-0.04	0.02	0.021	4.3e-06	0.00067	-0.09	0.62	0.89	0.46	0.32	0.16	0.05	1.27	0.97
Lipid	Fatty Acid Metabolism(Acyl Carnitine)	Decanoylcarnitine (C10)	33941	10245190		HMDB00651	LC/MS Pos Late	1130	316.248	0	1	0	0.01	0.96	0	0.01	0.91	-0.01	0.02	0.56	-0.02	0.01	0.081	-0.01	0.01	0.17	-0.01	0.01	0.45	-0.01	0.01	0.25	0	0.01	0.94	-0.02	0.01	0.043	0.00063	0.0035	-0.18	0.32	0.57	0.09	0.22	0.68	-0.23	0.7	0.74
Lipid	Fatty Acid Metabolism(Acyl Carnitine)	Dihomo-linolenoylcarnitine (20:3n3 or 6)*	57521				LC/MS Pos Late	1392	450.358	8.7232	2	0	0.03	0.86	-0.02	0.02	0.36	-0.05	0.03	0.085	-0.02	0.02	0.46	-0.02	0.01	0.029	-0.04	0.02	0.047	-0.02	0.01	0.25	-0.02	0.02	0.34	-0.03	0.02	0.062	1.7e-06	8.6e-07	0.13	0.98	0.9	0.17	0.57	0.76	-1.2	1.11	0.28
Lipid	Fatty Acid Metabolism(Acyl Carnitine)	Dihomo-linoleoylcarnitine (C20:2)*	57520				LC/MS Pos Late	1436	452.373	9.0404	2	0	0.03	0.9	0.01	0.02	0.69	-0.05	0.03	0.088	-0.02	0.02	0.41	-0.02	0.01	0.12	-0.04	0.02	0.052	-0.01	0.01	0.65	0	0.02	0.87	-0.03	0.02	0.063	5.1e-07	1.8e-05	-1.71	0.95	0.072	0.31	0.58	0.59	-1.13	1.22	0.36
Lipid	Fatty Acid Metabolism(Acyl Carnitine)	Eicosenoylcarnitine (C20:1)*	57519				LC/MS Pos Late	1484	454.389	9.2784	2	-0.01	0.02	0.6	0.03	0.02	0.11	-0.03	0.03	0.44	-0.01	0.02	0.66	0	0.01	0.9	-0.03	0.02	0.19	0.01	0.01	0.51	0.01	0.01	0.32	-0.01	0.02	0.43	3.2e-07	2.6e-05	-0.13	0.89	0.88	0.05	0.52	0.93	1.01	1.36	0.46
Lipid	Fatty Acid Metabolism(Acyl Carnitine)	Hexanoylcarnitine (C6)	32328	6426853		HMDB00705	LC/MS Pos Early	3308	260.186	0	1	0.01	0.01	0.62	0.01	0.01	0.5	-0.05	0.02	0.051	-0.05	0.02	0.0039	-0.01	0.01	0.098	-0.01	0.01	0.21	-0.01	0.01	0.3	0	0.01	0.5	-0.06	0.01	0.00013	4.3e-05	0.018	-0.2	0.51	0.69	-0.08	0.23	0.72	-0.82	1.02	0.42
Lipid	Fatty Acid Metabolism(Acyl Carnitine)	Laurylcarnitine (C12)	34534	10427569		HMDB02250	LC/MS Pos Late	1235	344.28	0	1	-0.01	0.01	0.41	0	0.01	0.9	-0.03	0.03	0.19	-0.02	0.01	0.18	-0.01	0.01	0.054	-0.02	0.01	0.082	-0.01	0.01	0.22	-0.01	0.01	0.53	-0.02	0.01	0.072	1.1e-05	5.5e-05	-0.23	0.55	0.68	0.15	0.37	0.69	-0.34	1.09	0.75
Lipid	Fatty Acid Metabolism(Acyl Carnitine)	Lignoceroylcarnitine (C24)*	57515				LC/MS Pos Late	1603	512.467	0	2	0.04	0.03	0.2	0.05	0.02	0.0049	0.08	0.03	0.016	0.03	0.03	0.36	0.05	0.01	0.00013	0.06	0.02	0.0045	0.04	0.02	0.0053	0.04	0.01	0.0028	0.05	0.02	0.03	0.00039	4.3e-07	0.25	1	0.8	0.59	0.5	0.23	2.47	1.45	0.092
Lipid	Fatty Acid Metabolism(Acyl Carnitine)	Linolenoylcarnitine (C18:3)*	57511				LC/MS Pos Late	1310	422.326	5.3132	2	-0.03	0.03	0.3	0.02	0.02	0.26	-0.06	0.04	0.073	-0.02	0.02	0.39	-0.02	0.01	0.2	-0.05	0.02	0.014	0	0.02	0.97	0.01	0.02	0.72	-0.03	0.02	0.081	1.2e-07	6.1e-06	0.44	0.98	0.65	0.8	0.61	0.19	-1.6	1.49	0.28
Lipid	Fatty Acid Metabolism(Acyl Carnitine)	Linoleoylcarnitine (C18:2)*	46223	6450015		HMDB06469	LC/MS Pos Late	1430	424.342	0	2	0	0.04	0.9	0.04	0.03	0.18	-0.08	0.04	0.059	-0.02	0.03	0.52	-0.01	0.02	0.45	-0.05	0.03	0.07	0.01	0.02	0.74	0.03	0.02	0.25	-0.05	0.03	0.087	2.7e-07	2e-06	-0.28	1.37	0.84	1.84	0.85	0.031	-1.98	1.88	0.29
Lipid	Fatty Acid Metabolism(Acyl Carnitine)	Margaroylcarnitine*	57512			HMDB06210	LC/MS Pos Late	1424	414.358	13.4814	2	-0.05	0.03	0.079	0.01	0.02	0.6	-0.05	0.04	0.18	0.04	0.02	0.087	0.01	0.01	0.43	-0.04	0.02	0.054	0.02	0.01	0.091	-0.01	0.02	0.64	0.02	0.02	0.19	1.3e-07	3.2e-08	0.5	1.01	0.62	0.38	0.56	0.49	1.8	1.6	0.26
Lipid	Fatty Acid Metabolism(Acyl Carnitine)	Myristoleoylcarnitine (C14:1)*	48182	90659872			LC/MS Pos Late	1316	370.295	0.0793	2	-0.02	0.02	0.17	-0.01	0.01	0.43	-0.06	0.02	0.019	-0.02	0.01	0.074	-0.02	0.01	0.0011	-0.04	0.01	0.0027	-0.02	0.01	0.036	-0.01	0.01	0.16	-0.03	0.01	0.0069	1e-06	7.8e-05	-0.61	0.65	0.35	0.01	0.36	0.97	-0.86	0.96	0.37
Lipid	Fatty Acid Metabolism(Acyl Carnitine)	Myristoylcarnitine (C14)	33952	6426854		HMDB05066	LC/MS Pos Late	1350	372.311	0.1586	1	-0.03	0.02	0.15	-0.01	0.02	0.64	-0.11	0.04	0.0041	-0.02	0.02	0.41	-0.03	0.01	0.013	-0.07	0.02	0.00087	-0.01	0.01	0.3	-0.02	0.02	0.21	-0.03	0.02	0.055	6.1e-08	5.2e-07	-0.94	0.9	0.29	0.24	0.59	0.68	-1.53	1.58	0.33
Lipid	Fatty Acid Metabolism(Acyl Carnitine)	Nervonoylcarnitine (C24:1)*	57531				LC/MS Pos Late	1602	510.452	9.3577	2	-0.01	0.03	0.76	0.03	0.02	0.13	-0.01	0.04	0.88	0	0.02	0.91	0	0.01	0.75	-0.01	0.02	0.51	0.01	0.01	0.37	0.02	0.02	0.28	-0.01	0.02	0.66	2.2e-06	4.3e-06	-0.79	1	0.43	0.68	0.54	0.21	1.32	1.59	0.41
Lipid	Fatty Acid Metabolism(Acyl Carnitine)	Nonanoylcarnitine (C9)	33904				LC/MS Pos Late	1060	302.232	7.0579	1	0	0.01	0.9	0.01	0.01	0.42	0.01	0.03	0.86	-0.02	0.02	0.32	0	0.01	0.88	0	0.01	0.79	0	0.01	0.99	0	0.01	0.6	-0.01	0.01	0.36	0.00017	9.2e-05	0.02	0.42	0.97	0.06	0.23	0.78	1.12	1.25	0.37
Lipid	Fatty Acid Metabolism(Acyl Carnitine)	Octanoylcarnitine (C8)	33936	123701	C02838	HMDB00791	LC/MS Pos Late	950	288.217	0	1	0	0.01	0.98	0.01	0.01	0.25	-0.01	0.02	0.47	-0.02	0.01	0.053	0	0	0.59	-0.01	0.01	0.46	0	0.01	0.87	0	0	0.36	-0.02	0.01	0.024	0.00018	0.021	-0.09	0.32	0.78	0.03	0.15	0.84	0.4	0.83	0.63
Lipid	Fatty Acid Metabolism(Acyl Carnitine)	Oleoylcarnitine (C18:1)	35160	6441392		HMDB05065	LC/MS Pos Late	1423	426.358	0	1	-0.01	0.04	0.87	0	0.03	0.95	-0.11	0.05	0.021	-0.03	0.03	0.4	-0.03	0.02	0.084	-0.06	0.03	0.029	-0.01	0.02	0.51	0	0.02	0.95	-0.06	0.03	0.04	2.3e-07	3.7e-07	-1.17	1.39	0.4	0.16	0.85	0.85	-0.26	1.98	0.9
Lipid	Fatty Acid Metabolism(Acyl Carnitine)	Palmitoleoylcarnitine (C16:1)*	53223	71464547			LC/MS Pos Late	1357	398.326	0	2	-0.02	0.02	0.42	-0.02	0.02	0.25	-0.09	0.03	0.0039	-0.04	0.02	0.045	-0.04	0.01	0.00023	-0.06	0.02	0.0022	-0.03	0.01	0.015	-0.02	0.01	0.15	-0.05	0.02	0.0011	3.1e-07	7.7e-05	-0.71	0.87	0.41	-0.17	0.47	0.72	-1.49	1.28	0.25
Lipid	Fatty Acid Metabolism(Acyl Carnitine)	Palmitoylcarnitine (C16)	44681	461	C02990	HMDB00222	LC/MS Pos Late	1425	400.342	0	1	-0.02	0.04	0.65	0	0.04	0.96	-0.13	0.05	0.014	-0.03	0.04	0.46	-0.03	0.02	0.09	-0.07	0.03	0.029	-0.02	0.03	0.5	-0.01	0.03	0.74	-0.05	0.03	0.073	4.1e-07	7.1e-08	-0.47	1.53	0.76	0.4	1.01	0.69	0.03	2.26	0.99
Lipid	Fatty Acid Metabolism(Acyl Carnitine)	Stearoylcarnitine (C18)	34409	6426855		HMDB00848	LC/MS Pos Late	1485	428.373	0	1	-0.05	0.03	0.098	0.04	0.03	0.16	-0.01	0.05	0.81	0.03	0.03	0.31	0.01	0.02	0.5	-0.04	0.03	0.16	0.04	0.02	0.086	0	0.02	0.96	0.02	0.03	0.38	6.4e-08	1.3e-07	-1.36	1.19	0.25	0.83	0.84	0.32	2.23	2	0.27
Lipid	Fatty Acid Metabolism(Acyl Carnitine)	Suberoylcarnitine (C8-DC)	52990				LC/MS Pos Early	2964	318.191	22.9976	1	-0.03	0.01	0.0069	-0.01	0	0.039	-0.03	0.01	0.00057	-0.02	0.01	0.014	-0.02	0	1.4e-07	-0.03	0.01	1e-06	-0.01	0	0.0024	-0.01	0	0.0023	-0.03	0.01	1.8e-05	6.6e-05	0.069	-0.43	0.38	0.26	-0.27	0.14	0.05	-0.85	0.34	0.014
Lipid	Fatty Acid Metabolism(Acyl Carnitine)	Ximenoylcarnitine (C26:1)*	57517				LC/MS Pos Late	1607	538.483	0.0793	2	0.01	0.03	0.83	0.04	0.02	0.11	0.01	0.04	0.83	0.01	0.03	0.8	0.01	0.01	0.36	0	0.02	0.99	0.02	0.02	0.24	0.03	0.02	0.15	0	0.02	0.98	2.1e-06	5.2e-06	-0.63	1.1	0.57	0.63	0.66	0.34	1.45	1.71	0.4
Lipid	Fatty Acid Metabolism(Acyl Glycine)	3-hydroxybutyroylglycine**	47964				LC/MS Neg	875	160.062	62.5694	3	-0.05	0.02	0.0029	0.01	0.01	0.22	0	0.03	0.9	0	0.02	0.9	0	0.01	0.76	-0.03	0.01	0.026	0.01	0.01	0.29	0	0.01	0.68	0	0.02	0.97	3.6e-08	6.3e-07	-0.78	0.59	0.19	-0.31	0.3	0.3	0.92	1.07	0.39
Lipid	Fatty Acid Metabolism(Acyl Glycine)	Hexanoylglycine	35436	99463		HMDB00701	LC/MS Neg	2900	172.098	53.3703	1	-0.02	0.01	0.16	0	0.01	0.79	-0.01	0.02	0.75	-0.01	0.02	0.46	-0.01	0.01	0.29	-0.01	0.01	0.24	-0.01	0.01	0.44	-0.01	0.01	0.34	-0.01	0.01	0.61	8e-06	1.8e-06	0.08	0.51	0.87	-0.15	0.31	0.64	-0.29	0.97	0.77
Lipid	Fatty Acid Metabolism(Acyl Glycine)	N-octanoylglycine	43502	84290		HMDB00832	LC/MS Neg	4335.4	200.129	98.4933	1	.	.	.	.	.	.	.	.	.	.	.	.	.	.	.	.	.	.	.	.	.	.	.	.	.	.	.	.	.	.	.	.	.	.	.	.	.	.
Lipid	Fatty Acid Metabolism(Acyl Glycine)	N-palmitoylglycine	42092	151008		HMDB13034	LC/MS Neg	5580	312.254	0	1	-0.04	0.03	0.22	0.05	0.03	0.12	-0.2	0.05	0.0001	-0.02	0.05	0.73	-0.03	0.02	0.14	-0.1	0.03	0.00053	0.02	0.03	0.41	0.01	0.02	0.65	-0.1	0.04	0.012	9.9e-08	4.6e-06	-1.3	1.33	0.33	-1.03	0.92	0.26	-1.76	2.25	0.44
Lipid	Fatty Acid Synthesis	Malonate	15872	867	C00383	HMDB00691	LC/MS Polar	3447	103.004	1.586	1	0.04	0.02	0.14	0.02	0.02	0.39	-0.04	0.04	0.3	0.04	0.03	0.23	0.02	0.01	0.22	0.01	0.02	0.78	0.02	0.02	0.18	0.02	0.02	0.14	0.01	0.03	0.73	2.4e-06	4.7e-07	0.05	0.97	0.96	-0.15	0.58	0.8	1.43	1.71	0.41
Lipid	Fatty Acid, Amide	N-linoleoylserine*	61823				LC/MS Neg	5492	366.265	27.9144	2	0.02	0.02	0.35	0.03	0.01	0.016	0.02	0.04	0.55	0.08	0.03	0.0072	0.04	0.01	0.00024	0.02	0.02	0.26	0.05	0.01	0.00062	0.03	0.01	0.0088	0.06	0.02	0.0045	4.6e-07	2.9e-08	0.3	0.68	0.66	0.6	0.41	0.15	0.06	1.49	0.97
Lipid	Fatty Acid, Amino	2-aminoheptanoate	43761	227939			LC/MS Pos Early	3160	146.118	1.1102	1	-0.03	0.02	0.17	-0.05	0.01	0.00024	-0.01	0.04	0.68	-0.07	0.02	0.0011	-0.05	0.01	4.4e-07	-0.02	0.02	0.21	-0.06	0.01	1.2e-06	-0.04	0.01	6.6e-05	-0.06	0.02	0.0012	0.00048	4.9e-07	-1.64	0.75	0.03	-1.27	0.39	0.0011	0.37	1.45	0.8
Lipid	Fatty Acid, Amino	2-aminooctanoate	43343	69522		HMDB00991	LC/MS Neg	3385	158.119	3.7272	1	-0.01	0.02	0.66	0.02	0.01	0.069	0.1	0.02	0.00016	0.01	0.01	0.44	0.02	0.01	0.0073	0.03	0.01	0.041	0.02	0.01	0.063	0.02	0.01	0.15	0.03	0.01	0.022	0.0011	2.2e-05	0.07	0.68	0.91	-0.11	0.39	0.78	0.08	1.1	0.94
Lipid	Fatty Acid, Amino	N-acetyl-2-aminooctanoate*	46458				LC/MS Neg	3943	200.129	0	2	-0.01	0.02	0.39	0.03	0.02	0.096	0.01	0.02	0.54	0	0.02	0.92	0	0.01	0.6	0	0.01	0.86	0.01	0.01	0.29	0.01	0.01	0.51	0	0.01	0.83	2.3e-06	4.3e-05	-0.03	0.59	0.96	-0.11	0.45	0.8	-0.56	0.73	0.44
Lipid	Fatty Acid, Branched	15-methylpalmitate (i17:0)	38768	17903417			LC/MS Neg	5695	269.249	0.0793	1	0	0.03	0.99	0.04	0.02	0.053	-0.05	0.04	0.25	0.07	0.03	0.031	0.03	0.01	0.023	-0.02	0.03	0.45	0.04	0.02	0.0066	0.03	0.02	0.076	0.04	0.03	0.13	7.4e-06	8.2e-09	1.72	1.26	0.17	0.23	0.53	0.66	1.6	1.86	0.39
Lipid	Fatty Acid, Branched	17-methylstearate (i19:0)	38296	3083779		HMDB37397	LC/MS Neg	5993	297.28	0	1	-0.03	0.03	0.34	0.04	0.02	0.064	-0.05	0.04	0.17	0.04	0.03	0.18	0.02	0.01	0.27	-0.04	0.02	0.1	0.04	0.02	0.034	0.02	0.02	0.25	0.01	0.02	0.63	1.2e-07	1.4e-07	-0.8	1.22	0.51	-0.02	0.57	0.97	1	1.61	0.53
Lipid	Fatty Acid, Branched	Branched-chain fatty acid 18:0 (2)**	48719				LC/MS Neg	5642	283.264	29.1832	3	.	.	.	.	.	.	.	.	.	.	.	.	.	.	.	.	.	.	.	.	.	.	.	.	.	.	.	.	.	.	.	.	.	.	.	.	.	.
Lipid	Fatty Acid, Branched	Isocaproate (i6:0)	22273	12587		HMDB00689	LC/MS Neg	2570	115.076	74.7819	1	-0.01	0.02	0.61	0.01	0.02	0.6	0.01	0.02	0.69	0.02	0.02	0.21	0.01	0.01	0.28	0	0.01	0.9	0.02	0.01	0.16	0	0.01	0.85	0.02	0.01	0.21	1e-06	4.6e-07	-0.58	0.69	0.41	0	0.45	1	0.95	0.9	0.29
Lipid	Fatty Acid, Dicarboxylate	2-hydroxyadipate	31934	193530	C02360	HMDB00321	LC/MS Polar	3000	161.046	28.2316	1	.	.	.	.	.	.	.	.	.	.	.	.	.	.	.	.	.	.	.	.	.	.	.	.	.	.	.	.	.	.	.	.	.	.	.	.	.	.
Lipid	Fatty Acid, Dicarboxylate	2-hydroxyglutarate	37253	43	C02630	HMDB00606	LC/MS Pos Early	958	131.034	0	1	0.04	0.03	0.15	-0.03	0.03	0.34	0.04	0.05	0.45	0.03	0.03	0.38	0.01	0.02	0.5	0.03	0.02	0.22	0	0.02	0.81	0	0.02	0.9	0.02	0.02	0.38	1.7e-05	4.9e-08	-0.28	1.02	0.78	-1.28	0.81	0.12	3.67	2.03	0.073
Lipid	Fatty Acid, Dicarboxylate	3-carboxy-4-methyl-5-pentyl-2-furanpropionate (3-CMPFP)**	46500				LC/MS Neg	4012	267.124	0	3	0	0.03	0.96	0.03	0.02	0.15	0.03	0.03	0.4	0.01	0.03	0.68	0.03	0.01	0.048	0.03	0.02	0.19	0.02	0.02	0.14	0.02	0.02	0.21	0.02	0.02	0.33	7.5e-05	6.3e-08	0.21	1.05	0.84	0.89	0.58	0.12	0.78	1.37	0.57
Lipid	Fatty Acid, Dicarboxylate	3-carboxy-4-methyl-5-propyl-2-furanpropanoate (CMPF)	31787	123979		HMDB61112	LC/MS Neg	2800	239.092	0	1	0.01	0.01	0.23	0	0	0.99	0.01	0.01	0.45	0	0	0.89	0	0	0.47	0.01	0.01	0.11	0	0	0.82	0	0	0.8	0	0	0.64	0.031	0.0011	0.31	0.33	0.35	-0.01	0.07	0.85	0.3	0.36	0.4
Lipid	Fatty Acid, Dicarboxylate	3-hydroxydodecanedioate*	48050				LC/MS Neg	2240	245.14	70.8961	2	0.01	0.02	0.59	-0.02	0.01	0.17	-0.06	0.02	0.025	0	0.02	0.81	-0.01	0.01	0.073	-0.02	0.01	0.16	-0.01	0.01	0.23	-0.01	0.01	0.31	-0.02	0.01	0.16	3.5e-06	1.6e-06	0	0.69	1	-0.26	0.35	0.46	-0.94	1.02	0.36
Lipid	Fatty Acid, Dicarboxylate	3-methyladipate	36749	12292		HMDB00555	LC/MS Polar	2865	159.066	58.3664	1	-0.01	0.02	0.41	0.02	0.01	0.043	0.02	0.03	0.53	-0.01	0.02	0.46	0	0.01	0.53	0	0.01	0.86	0.01	0.01	0.45	0.01	0.01	0.17	0	0.01	0.84	4.1e-06	3.1e-06	-0.39	0.67	0.56	-0.3	0.32	0.36	0.38	1.06	0.72
Lipid	Fatty Acid, Dicarboxylate	Azelate (nonanedioate)	18362	2266	C08261	HMDB00784	LC/MS Neg	1276	187.098	0.2379	1	.	.	.	.	.	.	.	.	.	.	.	.	.	.	.	.	.	.	.	.	.	.	.	.	.	.	.	.	.	.	.	.	.	.	.	.	.	.
Lipid	Fatty Acid, Dicarboxylate	Docosadioate	39837	244872	C19625		LC/MS Neg	5291.8	369.301	0	1	0.02	0.02	0.35	0.03	0.01	0.029	0.02	0.03	0.37	0	0.02	0.84	0.01	0.01	0.075	0.02	0.01	0.25	0.02	0.01	0.14	0.03	0.01	0.02	0.01	0.01	0.64	2.7e-05	7.3e-05	1.39	0.64	0.032	0.27	0.41	0.51	-0.78	1.1	0.48
Lipid	Fatty Acid, Dicarboxylate	Dodecadienoate (12:2)*	46388				LC/MS Neg	5153	195.139	0	2	0.01	0.02	0.72	0.07	0.02	0.00095	-0.03	0.04	0.42	-0.01	0.03	0.62	0.02	0.01	0.12	0	0.02	0.98	0.03	0.02	0.066	0.04	0.01	0.0047	-0.01	0.02	0.53	1.1e-06	1.3e-05	-0.76	0.86	0.38	1.84	0.57	0.0013	0.68	1.54	0.66
Lipid	Fatty Acid, Dicarboxylate	Dodecanedioate	32388	12736	C02678	HMDB00623	LC/MS Neg	2990	229.145	0	1	0.02	0.03	0.48	0.01	0.01	0.5	-0.04	0.02	0.013	0	0.02	0.98	0	0.01	0.66	-0.03	0.01	0.018	0	0.01	0.59	0.01	0.01	0.42	-0.02	0.01	0.17	2.8e-07	0.00065	0.02	1.1	0.99	-0.32	0.25	0.19	0.56	1.11	0.62
Lipid	Fatty Acid, Dicarboxylate	Dodecenedioate (C12:1-DC)*	46648				LC/MS Neg	2709	227.129	21.9667	2	0.01	0.01	0.54	0	0.01	0.73	-0.04	0.01	0.00024	-0.01	0.01	0.15	-0.01	0	0.0036	-0.03	0.01	0.0018	-0.01	0.01	0.11	0	0.01	0.95	-0.02	0.01	0.002	2.1e-05	0.048	0.19	0.52	0.71	-0.24	0.23	0.3	0.29	0.56	0.61
Lipid	Fatty Acid, Dicarboxylate	Eicosanodioate	39831	75502			LC/MS Neg	5200.9	341.27	0	1	0.03	0.02	0.14	0.05	0.02	0.0018	0.06	0.03	0.065	0.03	0.02	0.15	0.04	0.01	6.6e-05	0.04	0.02	0.017	0.04	0.01	0.0012	0.05	0.01	0.00055	0.04	0.02	0.03	4.3e-06	1.3e-05	1.75	0.81	0.031	0.31	0.48	0.51	-1.49	1.29	0.25
Lipid	Fatty Acid, Dicarboxylate	Eicosenedioate (C20:1-DC)*	47652				LC/MS Neg	5100	339.255	0.4758	2	0.05	0.03	0.041	0.05	0.02	0.01	0.04	0.04	0.3	0.02	0.02	0.36	0.04	0.01	0.00064	0.05	0.02	0.016	0.04	0.02	0.011	0.05	0.02	0.00091	0.03	0.02	0.17	1.1e-05	3.8e-05	2.13	1.01	0.036	0.55	0.59	0.35	-0.34	1.63	0.84
Lipid	Fatty Acid, Dicarboxylate	Glutarate (pentanedioate)	396	743	C00489	HMDB00661	LC/MS Polar	2900	131.035	0.2379	1	0	0.01	0.73	0	0.02	0.81	-0.03	0.01	0.0024	-0.03	0.02	0.17	-0.02	0.01	0.0011	-0.03	0.01	0.0015	-0.01	0.01	0.29	-0.01	0.01	0.58	-0.03	0.01	0.0006	0.0001	0.00011	-0.9	0.5	0.071	-0.67	0.46	0.15	-0.42	0.49	0.39
Lipid	Fatty Acid, Dicarboxylate	Hexadecanedioate	35678	10459	C19615	HMDB00672	LC/MS Neg	4615	285.207	0.0793	1	0.02	0.02	0.31	-0.02	0.02	0.2	-0.09	0.02	4.7e-07	-0.02	0.01	0.2	-0.03	0.01	6.6e-05	-0.06	0.01	1.1e-05	-0.02	0.01	0.043	-0.01	0.01	0.44	-0.04	0.01	0.00037	9.7e-09	2.3e-05	0.95	0.93	0.31	-0.58	0.44	0.2	-1.94	0.69	0.0057
Lipid	Fatty Acid, Dicarboxylate	Hexadecenedioate (C16:1-DC)*	46367				LC/MS Neg	4396.5	283.192	1.7446	2	0.02	0.02	0.28	0	0.02	0.88	-0.06	0.02	0.0069	-0.01	0.01	0.33	-0.02	0.01	0.038	-0.03	0.02	0.058	-0.01	0.01	0.24	0.01	0.01	0.64	-0.03	0.01	0.022	1.2e-06	7.7e-05	1.09	0.83	0.19	-0.62	0.49	0.21	-2.85	0.88	0.0015
Lipid	Fatty Acid, Dicarboxylate	Hydroxy-CMPF*	46497				LC/MS Neg	1525.4	255.088	0.0793	2	0.03	0.01	0.012	0.01	0	0.0049	0.03	0.01	0.0041	0	0	0.35	0.01	0	0.00014	0.03	0.01	3.2e-05	0.01	0	0.0094	0.01	0	0.0007	0.01	0	0.047	0.49	0.044	0.6	0.49	0.22	0.13	0.1	0.16	0.57	0.41	0.17
Lipid	Fatty Acid, Dicarboxylate	Maleate	20676	444266	C01384	HMDB00176	LC/MS Polar	2510	115.004	1.6653	1	0	0.01	0.56	-0.01	0.01	0.037	0	0	0.59	0	0.01	0.41	0	0	0.13	0	0	0.67	-0.01	0	0.071	-0.01	0	0.21	0	0	0.33	0.28	0.00047	-0.11	0.27	0.68	-0.08	0.12	0.5	0.24	0.16	0.14
Lipid	Fatty Acid, Dicarboxylate	Octadecadienedioate (C18:2-DC)*	46671				LC/MS Neg	4704	309.207	9.5163	2	-0.01	0.01	0.36	0	0.01	0.47	-0.01	0.01	0.56	0	0.01	0.68	0	0	0.55	-0.01	0.01	0.22	0	0.01	0.92	0	0	0.98	0	0.01	0.53	0.0006	0.0034	0.05	0.23	0.84	-0.04	0.18	0.84	-0.15	0.45	0.74
Lipid	Fatty Acid, Dicarboxylate	Octadecenedioate (C18:1-DC)*	46604				LC/MS Neg	4873	311.223	0	2	0.03	0.02	0.1	-0.02	0.02	0.27	-0.06	0.02	0.016	-0.02	0.02	0.29	-0.02	0.01	0.042	-0.02	0.01	0.28	-0.02	0.01	0.083	0	0.01	0.98	-0.03	0.01	0.024	3.1e-05	4.6e-05	1.28	0.74	0.083	-0.37	0.44	0.41	-1.44	0.64	0.025
Lipid	Fatty Acid, Dicarboxylate	Pimelate (heptanedioate)	15704	385	C02656	HMDB00857	LC/MS Polar	2745	159.066	9.437	1	0.04	0.03	0.22	0.01	0.02	0.56	0.01	0.02	0.64	0	0.02	0.89	0.01	0.01	0.29	0.02	0.02	0.23	0.01	0.01	0.61	0.02	0.02	0.32	0.01	0.02	0.65	0.0002	4.5e-06	-1.58	1.18	0.18	-0.47	0.59	0.42	1.72	1	0.089
Lipid	Fatty Acid, Dicarboxylate	Sebacate (decanedioate)	32398	5192	C08277	HMDB00792	LC/MS Neg	1788	201.113	2.617	1	0.05	0.03	0.13	0	0.02	0.81	0.03	0.04	0.47	0.01	0.02	0.53	0.01	0.01	0.29	0.04	0.02	0.14	0.01	0.01	0.48	0.01	0.02	0.43	0.01	0.02	0.45	0.00014	9.3e-07	-0.08	1.15	0.95	-0.58	0.6	0.34	3.14	1.58	0.049
Lipid	Fatty Acid, Dicarboxylate	Suberate (octanedioate)	15730	10457	C08278	HMDB00893	LC/MS Polar	2577.6	173.082	1.9033	1	.	.	.	.	.	.	.	.	.	.	.	.	.	.	.	.	.	.	.	.	.	.	.	.	.	.	.	.	.	.	.	.	.	.	.	.	.	.
Lipid	Fatty Acid, Dicarboxylate	Tetradecadienedioate (C14:2-DC)*	46904				LC/MS Neg	3172	253.145	6.2649	2	-0.01	0.02	0.74	-0.01	0.01	0.32	-0.07	0.02	0.0004	-0.01	0.01	0.24	-0.01	0.01	0.0047	-0.05	0.01	0.00078	-0.01	0.01	0.08	-0.01	0.01	0.25	-0.02	0.01	0.029	5.1e-08	0.00025	-0.38	0.76	0.62	-0.64	0.28	0.022	-1.9	0.9	0.037
Lipid	Fatty Acid, Dicarboxylate	Tetradecanedioate	35669	13185		HMDB00872	LC/MS Neg	4000	257.176	0.0793	1	0.03	0.02	0.19	-0.01	0.01	0.67	-0.08	0.02	4.9e-06	-0.01	0.01	0.29	-0.02	0.01	0.0052	-0.05	0.01	8.7e-05	-0.01	0.01	0.18	0	0.01	0.92	-0.02	0.01	0.0054	4.5e-09	0.00023	0.83	0.95	0.38	-0.57	0.38	0.13	-1.57	0.96	0.1
Lipid	Fatty Acid, Dicarboxylate	Tridecenedioate (C13:1-DC)*	46598				LC/MS Neg	3121	241.144	1.1895	2	-0.01	0.02	0.59	0.02	0.01	0.1	-0.07	0.03	0.021	0	0.02	0.76	0	0.01	0.7	-0.03	0.02	0.078	0.01	0.01	0.21	0.01	0.01	0.25	-0.01	0.01	0.63	5.1e-07	2.6e-05	-0.56	0.7	0.42	0.43	0.4	0.28	-0.32	1.39	0.82
Lipid	Fatty Acid, Dicarboxylate	Undecanedioate	42395	15816		HMDB00888	LC/MS Neg	2440	215.129	1.586	1	.	.	.	.	.	.	.	.	.	.	.	.	.	.	.	.	.	.	.	.	.	.	.	.	.	.	.	.	.	.	.	.	.	.	.	.	.	.
Lipid	Fatty Acid, Dihydroxy	12,13-DiHOME	38395	10236635	C14829	HMDB04705	LC/MS Neg	5137	313.238	22.2046	1	0.02	0.02	0.24	-0.01	0.01	0.63	-0.03	0.02	0.19	-0.01	0.02	0.75	-0.01	0.01	0.47	-0.01	0.01	0.62	-0.01	0.01	0.53	0	0.01	0.82	-0.01	0.01	0.26	0.00021	0.00058	0.58	0.68	0.39	-0.02	0.34	0.96	0.08	0.87	0.93
Lipid	Fatty Acid, Dihydroxy	5,6-DiHETrE	46306	5283142	C14772	HMDB02343	LC/MS Neg	5326	337.238	15.0674	1	-0.02	0.02	0.38	-0.03	0.01	0.025	-0.02	0.03	0.58	0	0.02	0.92	-0.02	0.01	0.031	-0.02	0.02	0.36	-0.02	0.01	0.078	-0.03	0.01	0.0096	-0.01	0.02	0.77	9.4e-06	3.1e-07	-0.17	0.9	0.85	-0.71	0.36	0.048	1.04	1.43	0.47
Lipid	Fatty Acid, Dihydroxy	9,10-DiHOME	38399	9966640	C14828	HMDB04704	LC/MS Neg	5180	313.238	12.6883	1	0.02	0.02	0.46	-0.03	0.01	0.044	-0.03	0.02	0.25	0	0.01	0.71	-0.01	0.01	0.067	-0.01	0.02	0.36	-0.01	0.01	0.12	-0.02	0.01	0.13	-0.01	0.01	0.3	6.8e-05	1.6e-06	0.04	0.93	0.97	-0.35	0.37	0.34	-0.89	0.99	0.37
Lipid	Fatty Acid, Keto	1-dihomo-linoleoylglycerol (20:2)	35103				LC/MS Neg	6800	307.264	9.6749	1	0.01	0.02	0.71	0.03	0.02	0.023	-0.01	0.04	0.77	0.01	0.02	0.77	0.02	0.01	0.085	0.01	0.02	0.72	0.02	0.01	0.09	0.03	0.01	0.028	0	0.02	0.89	5.1e-06	1.2e-05	0.52	0.79	0.51	0.3	0.43	0.48	-0.97	1.49	0.52
Lipid	Fatty Acid, Monohydroxy	13-HODE + 9-HODE	37752	43013			LC/MS Neg	5275	295.228	0.4758	1	-0.01	0.03	0.84	0.04	0.02	0.065	-0.02	0.03	0.56	-0.02	0.02	0.3	0	0.01	0.95	-0.02	0.02	0.39	0	0.01	0.87	0.03	0.02	0.091	-0.02	0.02	0.2	6.1e-06	3.5e-05	0.6	1.14	0.6	-0.08	0.57	0.89	1.85	1.16	0.11
Lipid	Fatty Acid, Monohydroxy	14-HDoHE/17-HDoHE	53034				LC/MS Neg	5296	343.228	59.4766	1	0.02	0.02	0.18	-0.01	0.01	0.49	-0.02	0.02	0.46	0.03	0.02	0.054	0.01	0.01	0.26	0.01	0.01	0.59	0.01	0.01	0.33	0	0.01	0.94	0.02	0.01	0.16	1.5e-05	3e-08	-0.06	0.59	0.92	-0.11	0.33	0.75	0.36	0.9	0.69
Lipid	Fatty Acid, Monohydroxy	2-hydroxybehenate	57663	193484			LC/MS Neg	6384	355.322	0.3172	1	-0.03	0.03	0.37	-0.01	0.02	0.57	0.01	0.04	0.88	0.02	0.04	0.67	-0.01	0.02	0.59	-0.01	0.02	0.68	0	0.02	0.86	-0.02	0.02	0.24	0.01	0.03	0.7	3.9e-06	1.4e-08	-2.2	0.94	0.02	-0.61	0.67	0.36	1.93	1.51	0.2
Lipid	Fatty Acid, Monohydroxy	2-hydroxydecanoate	42489	21488			LC/MS Neg	4840	187.134	0	1	0.01	0.03	0.59	0	0.01	0.94	0.05	0.02	0.0071	0	0.01	0.76	0.01	0.01	0.43	0.03	0.01	0.011	0	0.01	0.78	0	0.01	0.79	0.01	0.01	0.38	0.0067	6.4e-06	0.56	0.96	0.56	0.09	0.29	0.76	-0.52	0.36	0.15
Lipid	Fatty Acid, Monohydroxy	2-hydroxyheptanoate*	61827	2750949			LC/MS Neg	2900	145.087	60.3489	2	-0.02	0.02	0.23	0	0.01	0.82	0	0.02	0.92	-0.02	0.02	0.29	-0.01	0.01	0.14	-0.02	0.01	0.16	-0.01	0.01	0.53	-0.01	0.01	0.59	-0.02	0.01	0.19	2.6e-06	8.4e-07	-0.6	0.58	0.3	0.34	0.35	0.34	1.23	0.92	0.18
Lipid	Fatty Acid, Monohydroxy	2-hydroxylaurate	52916	97783			LC/MS Neg	5211	215.165	9.437	1	0.02	0.03	0.52	0.04	0.02	0.079	0.09	0.03	0.0094	0.05	0.03	0.088	0.05	0.01	0.00057	0.05	0.02	0.008	0.04	0.02	0.017	0.03	0.02	0.066	0.07	0.02	0.0032	6.1e-06	2.5e-07	1.22	0.99	0.22	-0.07	0.61	0.91	1.71	1.39	0.22
Lipid	Fatty Acid, Monohydroxy	2-hydroxynervonate*	61698	5312783			LC/MS Neg	6345	381.337	0.2379	2	-0.04	0.02	0.14	-0.02	0.02	0.45	-0.04	0.03	0.24	-0.04	0.03	0.18	-0.04	0.01	0.0062	-0.04	0.02	0.038	-0.03	0.02	0.11	-0.03	0.02	0.11	-0.04	0.02	0.047	8.2e-06	1.5e-06	-1.83	0.86	0.035	-1.08	0.62	0.084	-0.68	1.27	0.6
Lipid	Fatty Acid, Monohydroxy	2-hydroxyoctanoate	22036	94180		HMDB02264	LC/MS Neg	3736.8	159.103	0.3965	1	0.01	0.02	0.43	0.02	0.01	0.039	0.06	0.04	0.08	-0.02	0.02	0.32	0.01	0.01	0.069	0.03	0.02	0.14	0.01	0.01	0.22	0.02	0.01	0.017	-0.01	0.02	0.76	0.00021	2.3e-05	0.7	0.71	0.33	0.38	0.28	0.17	0.63	1.5	0.68
Lipid	Fatty Acid, Monohydroxy	2-hydroxypalmitate	35675	92836		HMDB31057	LC/MS Neg	5511.2	271.228	0	1	-0.04	0.05	0.49	0.18	0.04	6.5e-06	-0.21	0.08	0.0065	0.06	0.06	0.26	0.05	0.03	0.053	-0.1	0.04	0.018	0.13	0.03	0.00013	0.11	0.03	0.0005	-0.03	0.05	0.56	3.4e-09	5.1e-07	-0.71	1.97	0.72	1.16	1.12	0.3	-7.47	3.07	0.016
Lipid	Fatty Acid, Monohydroxy	2-hydroxystearate	17945	69417	C03045		LC/MS Neg	5695	299.259	0	1	-0.04	0.05	0.37	0.14	0.04	0.00018	-0.09	0.08	0.23	0.15	0.06	0.011	0.07	0.03	0.0045	-0.06	0.04	0.17	0.14	0.03	1.7e-05	0.08	0.03	0.0086	0.08	0.05	0.11	2e-09	1.1e-08	-1.07	1.75	0.54	0.4	1.05	0.7	-4.17	3.26	0.2
Lipid	Fatty Acid, Monohydroxy	3-hydroxydecanoate	22053	26612		HMDB02203	LC/MS Neg	4634.7	187.134	0	1	-0.01	0.02	0.61	0	0.01	0.81	-0.05	0.02	0.048	0	0.02	0.99	-0.01	0.01	0.42	-0.03	0.01	0.035	0	0.01	0.95	0	0.01	0.94	-0.02	0.02	0.25	3.7e-07	5.1e-05	-0.92	0.76	0.23	0.55	0.28	0.054	0.16	1.08	0.88
Lipid	Fatty Acid, Monohydroxy	3-hydroxyhexanoate	53230	151492			LC/MS Neg	1725	131.071	0	1	-0.01	0.02	0.7	0	0.02	0.91	-0.09	0.03	0.0028	-0.02	0.02	0.39	-0.02	0.01	0.048	-0.05	0.02	0.0068	-0.01	0.01	0.42	0	0.01	0.76	-0.04	0.02	0.027	1.8e-07	2.5e-05	-1.83	0.89	0.041	0.33	0.45	0.46	-1.5	1.26	0.23
Lipid	Fatty Acid, Monohydroxy	3-hydroxylaurate	32457	94216		HMDB00387	LC/MS Neg	5175	215.165	0	1	-0.01	0.02	0.39	0.02	0.01	0.1	-0.04	0.02	0.12	0	0.02	0.96	0	0.01	0.91	-0.03	0.01	0.045	0.01	0.01	0.28	0.01	0.01	0.34	-0.01	0.02	0.4	9.3e-08	4e-05	-0.76	0.66	0.25	0.89	0.39	0.023	-0.11	1	0.91
Lipid	Fatty Acid, Monohydroxy	3-hydroxyoctanoate	22001	26613		HMDB01954	LC/MS Neg	3446	159.103	0	1	0	0.02	0.85	0	0.01	0.67	-0.05	0.03	0.05	-0.02	0.02	0.31	-0.01	0.01	0.1	-0.03	0.02	0.07	-0.01	0.01	0.31	0	0.01	0.65	-0.03	0.01	0.061	1.7e-06	0.00021	-1.08	0.78	0.17	0.4	0.25	0.11	-0.4	0.97	0.68
Lipid	Fatty Acid, Monohydroxy	3-hydroxyoleate*	61843				LC/MS Neg	5508	297.244	0.5551	2	-0.01	0.03	0.8	0.05	0.02	0.028	-0.09	0.04	0.014	0.03	0.03	0.34	0.01	0.01	0.6	-0.06	0.02	0.022	0.04	0.02	0.04	0.03	0.02	0.096	-0.01	0.02	0.57	7.2e-09	3.4e-06	-0.54	1.32	0.68	0.65	0.62	0.3	-1.08	1.62	0.5
Lipid	Fatty Acid, Monohydroxy	3-hydroxysebacate	31943	3017884		HMDB00350	LC/MS Neg	1282	217.108	32.0381	1	-0.01	0.02	0.47	-0.02	0.01	0.012	-0.05	0.01	0.00036	-0.02	0.01	0.2	-0.03	0.01	1.9e-05	-0.04	0.01	0.0003	-0.02	0.01	0.0051	-0.02	0.01	0.0055	-0.03	0.01	0.0019	4.5e-05	0.0014	-0.98	0.67	0.14	-0.33	0.24	0.17	0.5	0.82	0.54
Lipid	Fatty Acid, Monohydroxy	5-hydroxydecanoate	43011	1825		HMDB40329	LC/MS Neg	4080	187.134	5.5511	1	.	.	.	.	.	.	.	.	.	.	.	.	.	.	.	.	.	.	.	.	.	.	.	.	.	.	.	.	.	.	.	.	.	.	.	.	.	.
Lipid	Fatty Acid, Monohydroxy	5-hydroxyhexanoate	31938	170748		HMDB00525	LC/MS Neg	1267	131.071	1.6653	1	0.07	0.03	0.035	0.01	0.02	0.72	-0.08	0.05	0.07	-0.03	0.03	0.32	-0.01	0.01	0.53	0	0.03	0.88	-0.01	0.02	0.61	0.03	0.02	0.17	-0.04	0.02	0.061	3e-06	1.4e-05	-1.68	1.24	0.18	0.23	0.66	0.73	0.43	1.86	0.82
Lipid	Fatty Acid, Monohydroxy	5-hydroxyvalproate	61832	135244	C16650	HMDB13898	LC/MS Neg	2403	159.103	99.4449	1	.	.	.	.	.	.	.	.	.	.	.	.	.	.	.	.	.	.	.	.	.	.	.	.	.	.	.	.	.	.	.	.	.	.	.	.	.	.
Lipid	Fatty Acid, Monohydroxy	8-hydroxyoctanoate	21239	69820		HMDB61914	LC/MS Neg	2300	159.103	5.7891	1	.	.	.	.	.	.	.	.	.	.	.	.	.	.	.	.	.	.	.	.	.	.	.	.	.	.	.	.	.	.	.	.	.	.	.	.	.	.
Lipid	Fatty Acid, Monohydroxy	9-hydroxystearate	47120	9570127		HMDB61661	LC/MS Neg	5384	299.259	4.0444	1	-0.01	0.02	0.8	-0.01	0.01	0.3	-0.07	0.03	0.0054	-0.01	0.02	0.53	-0.02	0.01	0.011	-0.05	0.02	0.0043	-0.01	0.01	0.17	-0.01	0.01	0.33	-0.03	0.02	0.031	1.3e-07	0.0011	-0.67	0.85	0.44	-0.72	0.36	0.045	-1.59	1.14	0.16
Lipid	Fatty Acid, Monohydroxy	Alpha-hydroxycaproate	37073	99824		HMDB01624	LC/MS Neg	1920	131.071	53.7669	1	-0.02	0.01	0.27	-0.04	0.01	0.00079	0.02	0.02	0.5	0	0.02	0.9	-0.02	0.01	0.0093	-0.01	0.01	0.39	-0.02	0.01	0.024	-0.03	0.01	0.0006	0	0.01	0.83	5.3e-05	3.6e-09	-0.09	0.52	0.87	-0.77	0.33	0.021	1.48	0.94	0.12
Lipid	Fatty Acid, Monohydroxy	Hydroxystearate sulfate	57392				LC/MS Neg	5115	379.216	91.4354	1	.	.	.	.	.	.	.	.	.	.	.	.	.	.	.	.	.	.	.	.	.	.	.	.	.	.	.	.	.	.	.	.	.	.	.	.	.	.
Lipid	Glycerolipid Metabolism	Glycerol	15122	753	C00116	HMDB00131	LC/MS Neg	758	91.0401	0	1	-0.01	0.02	0.66	-0.01	0.02	0.41	-0.11	0.05	0.029	-0.1	0.04	0.014	-0.03	0.01	0.0069	-0.04	0.02	0.054	-0.03	0.02	0.051	-0.01	0.01	0.31	-0.11	0.03	0.00068	4.2e-06	0.0062	-0.03	0.89	0.97	-0.01	0.45	0.98	0.12	2.21	0.96
Lipid	Glycerolipid Metabolism	Glycerol 3-phosphate	43847	754	C00093	HMDB00126	LC/MS Pos Early	580	173.021	0	1	0.01	0.03	0.74	0.03	0.03	0.27	-0.04	0.04	0.41	-0.02	0.03	0.53	0	0.02	0.81	0	0.02	0.85	0	0.02	0.89	0.02	0.02	0.43	-0.03	0.03	0.29	2.4e-06	1.1e-06	-0.37	1.02	0.72	-0.8	0.88	0.36	0.67	1.89	0.72
Lipid	Glycerolipid Metabolism	Glycerophosphoglycerol	48857	439964	C03274		LC/MS Polar	2430	245.043	30.9278	1	0	0.02	0.87	0	0.01	0.85	0	0.03	1	-0.01	0.02	0.8	0	0.01	0.62	0	0.01	0.95	-0.01	0.01	0.66	0	0.01	0.87	-0.01	0.02	0.62	0.00037	1.6e-05	-0.38	0.58	0.51	-0.12	0.4	0.77	-0.18	1.08	0.87
Lipid	Inositol Metabolism	Chiro-inositol	37112		C19891	HMDB34220	LC/MS Polar	3191.2	225.062	91.0389	1	.	.	.	.	.	.	.	.	.	.	.	.	.	.	.	.	.	.	.	.	.	.	.	.	.	.	.	.	.	.	.	.	.	.	.	.	.	.
Lipid	Inositol Metabolism	Myo-inositol	1124	892	C00137	HMDB00211	LC/MS Polar	3506.3	225.062	0.0793	1	.	.	.	.	.	.	.	.	.	.	.	.	.	.	.	.	.	.	.	.	.	.	.	.	.	.	.	.	.	.	.	.	.	.	.	.	.	.
Lipid	Ketone Bodies	3-hydroxybutyrate (BHBA)	542	441	C01089	HMDB00357	LC/MS Polar	1444	103.04	0	1	0.01	0.01	0.3	0	0	0.57	-0.01	0.01	0.021	0	0.01	0.48	0	0	0.41	-0.01	0	0.14	0	0	0.93	0	0	0.36	-0.01	0	0.053	0.00028	0.12	-0.4	0.13	0.0025	-0.06	0.11	0.55	-0.09	0.27	0.74
Lipid	Ketone Bodies	Acetoacetate	33963	96	C00164	HMDB00060	LC/MS Pos Early	1062	103.039	13.2435	1	0.01	0.01	0.37	0	0.01	0.68	-0.02	0.01	0.026	0	0.01	0.94	0	0	0.49	-0.01	0.01	0.11	0	0.01	0.82	0	0.01	0.49	-0.01	0.01	0.14	0.00011	0.0075	-0.63	0.25	0.012	-0.13	0.19	0.48	-0.06	0.36	0.86
Lipid	Long Chain Fatty Acid	10-heptadecenoate (17:1n7)	33971	5312435		HMDB60038	LC/MS Neg	5555	267.233	0	1	0	0.02	0.85	-0.01	0.01	0.65	-0.06	0.04	0.11	-0.01	0.02	0.58	-0.01	0.01	0.18	-0.02	0.02	0.19	-0.01	0.01	0.4	-0.01	0.01	0.59	-0.02	0.02	0.21	9.3e-06	1.2e-05	0.4	0.85	0.64	-0.25	0.38	0.51	0.37	1.41	0.8
Lipid	Long Chain Fatty Acid	10-nonadecenoate (19:1n9)	33972	5312513		HMDB13622	LC/MS Neg	5780	295.264	0	1	0	0.02	0.93	0.01	0.02	0.46	-0.07	0.03	0.027	-0.01	0.03	0.8	-0.01	0.01	0.6	-0.03	0.02	0.097	0	0.01	0.78	0.01	0.01	0.56	-0.03	0.02	0.19	1.1e-06	6.3e-06	-0.2	0.91	0.83	-0.1	0.46	0.82	0.22	1.37	0.87
Lipid	Long Chain Fatty Acid	Arachidate (20:0)	1118	10467	C06425	HMDB02212	LC/MS Neg	6240	311.296	0	1	-0.04	0.04	0.35	0.04	0.03	0.23	-0.06	0.05	0.24	0.06	0.05	0.22	0.01	0.02	0.55	-0.05	0.03	0.14	0.05	0.03	0.091	0.01	0.03	0.66	0.01	0.03	0.7	6.8e-08	8.2e-08	-2.45	1.24	0.049	-0.55	0.92	0.55	2.44	2.09	0.25
Lipid	Long Chain Fatty Acid	Eicosenoate (20:1)	33587	5282768	C16526	HMDB02231	LC/MS Neg	5950	309.28	0	1	0.01	0.02	0.7	0.01	0.02	0.4	-0.06	0.03	0.037	-0.02	0.02	0.44	-0.01	0.01	0.42	-0.02	0.02	0.18	0	0.01	0.97	0.01	0.01	0.4	-0.03	0.02	0.062	2.2e-06	3.1e-05	-0.63	0.75	0.4	-0.24	0.48	0.61	0.23	1.08	0.83
Lipid	Long Chain Fatty Acid	Erucate (22:1n9)	1552	5281116	C08316	HMDB02068	LC/MS Neg	6355.6	337.311	0	1	-0.03	0.02	0.18	0.03	0.02	0.057	-0.02	0.02	0.24	-0.01	0.01	0.31	-0.01	0.01	0.31	-0.03	0.01	0.053	0	0.01	0.99	0.01	0.01	0.45	-0.02	0.01	0.17	3.8e-07	3.4e-05	-1.33	0.73	0.068	0.06	0.51	0.91	0.54	0.84	0.52
Lipid	Long Chain Fatty Acid	Margarate (17:0)	1121	10465		HMDB02259	LC/MS Neg	5731	269.249	0	1	0	0.03	0.88	0.02	0.02	0.25	-0.07	0.04	0.081	0.05	0.03	0.11	0.01	0.01	0.32	-0.03	0.02	0.26	0.03	0.02	0.073	0.01	0.02	0.4	0.01	0.03	0.62	4e-07	4.2e-08	0.45	1.06	0.67	0.25	0.57	0.66	1.51	1.6	0.35
Lipid	Long Chain Fatty Acid	Myristate (14:0)	1365	11005	C06424	HMDB00806	LC/MS Neg	5440	227.202	0	1	0.01	0.03	0.75	0.01	0.02	0.67	-0.11	0.04	0.016	0.02	0.03	0.64	0	0.01	0.87	-0.04	0.03	0.092	0.01	0.02	0.6	0.01	0.01	0.59	-0.02	0.03	0.39	7.8e-07	1.2e-06	1.23	1.13	0.28	-0.02	0.49	0.96	0.55	1.93	0.77
Lipid	Long Chain Fatty Acid	Myristoleate (14:1n5)	32418	5281119	C08322	HMDB02000	LC/MS Neg	5346.9	225.186	0	1	0.01	0.02	0.65	-0.01	0.01	0.21	-0.08	0.03	0.013	-0.02	0.02	0.18	-0.02	0.01	0.024	-0.02	0.02	0.14	-0.01	0.01	0.058	-0.01	0.01	0.32	-0.03	0.01	0.022	2e-05	0.0085	0.21	0.67	0.76	-0.28	0.23	0.23	-1.11	1.43	0.44
Lipid	Long Chain Fatty Acid	Nonadecanoate (19:0)	1356	12591	C16535	HMDB00772	LC/MS Neg	6068	297.28	0	1	-0.03	0.04	0.52	0.1	0.03	0.0026	-0.09	0.05	0.057	0.12	0.05	0.014	0.05	0.02	0.021	-0.05	0.03	0.094	0.1	0.03	0.00013	0.05	0.03	0.031	0.03	0.03	0.34	1.3e-08	1.2e-07	-1.94	1.5	0.2	0.56	0.9	0.54	2.01	2.13	0.35
Lipid	Long Chain Fatty Acid	Oleate/vaccenate (18:1)	52285				LC/MS Neg	5655	281.249	0	1	0	0.03	0.91	0	0.02	0.96	-0.08	0.04	0.039	-0.02	0.03	0.65	-0.01	0.01	0.31	-0.03	0.02	0.19	-0.01	0.02	0.71	0	0.02	0.97	-0.04	0.03	0.12	2.2e-06	2.9e-06	-0.16	1.04	0.88	-0.31	0.59	0.6	0.82	1.63	0.62
Lipid	Long Chain Fatty Acid	Palmitate (16:0)	1336	985	C00249	HMDB00220	LC/MS Neg	5618	255.233	0	1	0.01	0.03	0.7	0	0.03	1	-0.12	0.05	0.011	0	0.04	0.99	-0.02	0.02	0.38	-0.04	0.03	0.14	0	0.02	0.9	0	0.02	0.89	-0.04	0.03	0.17	9.1e-07	5.8e-07	0.07	1.2	0.95	-0.06	0.72	0.93	0.87	1.93	0.65
Lipid	Long Chain Fatty Acid	Palmitoleate (16:1n7)	33447	445638	C08362	HMDB03229	LC/MS Neg	5475	253.217	0	1	0.01	0.02	0.66	-0.02	0.01	0.083	-0.07	0.03	0.019	-0.03	0.02	0.089	-0.02	0.01	0.0026	-0.02	0.02	0.11	-0.02	0.01	0.011	-0.01	0.01	0.15	-0.04	0.01	0.0054	1.8e-05	0.0063	0.24	0.67	0.72	-0.46	0.26	0.078	-0.52	1.18	0.66
Lipid	Long Chain Fatty Acid	Pentadecanoate (15:0)	1361	13849	C16537	HMDB00826	LC/MS Neg	5521	241.217	0	1	0.02	0.07	0.74	0.07	0.04	0.074	-0.15	0.1	0.14	0.1	0.07	0.14	0.05	0.03	0.055	-0.03	0.06	0.58	0.07	0.03	0.03	0.06	0.03	0.067	0.05	0.05	0.39	1.2e-05	3e-09	4.02	2.54	0.11	0.54	1.04	0.61	3.44	4.32	0.43
Lipid	Long Chain Fatty Acid	Stearate (18:0)	1358	5281	C01530	HMDB00827	LC/MS Neg	5872	283.264	0	1	-0.02	0.04	0.61	0.05	0.03	0.17	-0.13	0.05	0.015	0.08	0.05	0.14	0.01	0.02	0.67	-0.06	0.03	0.05	0.05	0.03	0.059	0.02	0.03	0.45	-0.01	0.04	0.86	5.4e-08	5.9e-08	-0.87	1.51	0.56	0.14	0.93	0.88	1.5	2.27	0.51
Lipid	Lysophospholipid	1-arachidonoyl-GPA (20:4)	46325				LC/MS Neg	5499	457.236	0	1	0	0.02	0.95	0.02	0.01	0.25	-0.01	0.02	0.47	0.01	0.02	0.67	0.01	0.01	0.55	0	0.01	0.71	0.01	0.01	0.28	0.01	0.01	0.42	0	0.01	0.95	3.5e-06	6.2e-06	-0.36	0.71	0.61	0.17	0.38	0.65	0.41	0.82	0.62
Lipid	Lysophospholipid	1-arachidonoyl-GPC (20:4n6)*	33228		C05208	HMDB10395	LC/MS Pos Late	1460	544.34	0	2	0.01	0.04	0.78	-0.01	0.03	0.78	0.03	0.06	0.59	0.06	0.04	0.2	0.02	0.02	0.28	0.03	0.03	0.42	0.02	0.03	0.49	0	0.03	0.98	0.05	0.04	0.16	1.3e-06	8e-09	0.72	1.39	0.61	-0.11	1	0.91	3.46	2.46	0.16
Lipid	Lysophospholipid	1-arachidonoyl-GPE (20:4n6)*	35186	42607465		HMDB11517	LC/MS Pos Late	1470	502.293	0	2	-0.02	0.04	0.65	-0.07	0.03	0.015	-0.01	0.05	0.85	0	0.04	0.97	-0.03	0.02	0.071	-0.01	0.03	0.68	-0.04	0.02	0.095	-0.06	0.02	0.017	-0.01	0.03	0.75	7.8e-06	9.7e-09	-0.97	1.44	0.5	-1.07	0.86	0.21	2.07	2.26	0.36
Lipid	Lysophospholipid	1-arachidonoyl-GPI (20:4)*	34214			HMDB61690	LC/MS Neg	5482	619.289	0	2	-0.02	0.03	0.61	0.01	0.02	0.76	-0.01	0.04	0.88	0	0.04	0.95	-0.01	0.02	0.73	-0.01	0.03	0.6	0	0.02	0.93	0	0.02	0.87	-0.01	0.03	0.73	1.2e-06	2.1e-07	-0.25	1.14	0.82	-0.49	0.66	0.46	0.62	1.85	0.74
Lipid	Lysophospholipid	1-lignoceroyl-GPC (24:0)	49617			HMDB10405	LC/MS Pos Late	1907	608.465	2.4584	1	0.01	0.03	0.66	0.08	0.02	0.00089	0.05	0.04	0.21	0.05	0.03	0.11	0.06	0.02	0.0002	0.03	0.02	0.17	0.07	0.02	0.00046	0.06	0.02	0.0026	0.06	0.03	0.024	3.2e-07	2.9e-07	-0.74	1.18	0.53	0.08	0.67	0.91	1.43	1.62	0.38
Lipid	Lysophospholipid	1-linolenoyl-GPC (18:3)*	45951			HMDB10388	LC/MS Pos Late	1410	518.324	0.0793	2	0	0.03	0.88	0.02	0.02	0.31	0.04	0.03	0.21	0.05	0.03	0.06	0.02	0.01	0.048	0.02	0.02	0.44	0.03	0.01	0.044	0.01	0.01	0.36	0.04	0.02	0.037	5.8e-06	3.6e-08	0.65	1.04	0.53	0.45	0.44	0.3	-0.5	1.43	0.73
Lipid	Lysophospholipid	1-linoleoyl-GPA (18:2)*	52690			HMDB07856	LC/MS Neg	5483	433.236	0	2	0.03	0.02	0.09	0	0.02	0.78	0.04	0.03	0.1	-0.01	0.02	0.47	0.01	0.01	0.45	0.04	0.02	0.012	-0.01	0.01	0.35	0.01	0.01	0.51	0.01	0.02	0.58	0.0024	9.1e-07	1.84	0.7	0.0091	0.52	0.47	0.27	-0.27	1.11	0.81
Lipid	Lysophospholipid	1-linoleoyl-GPC (18:2)	34419	11988421	C04100	HMDB10386	LC/MS Pos Late	1465	520.34	0	1	0.06	0.06	0.28	0.18	0.05	0.00017	0.16	0.08	0.048	0.22	0.06	0.00015	0.17	0.03	5.6e-09	0.1	0.05	0.032	0.2	0.04	8.2e-08	0.14	0.04	0.00013	0.21	0.05	9.9e-06	3.4e-06	1.1e-07	-0.13	2.17	0.95	2.06	1.3	0.12	0.27	3.31	0.93
Lipid	Lysophospholipid	1-linoleoyl-GPE (18:2)*	36600	52925130		HMDB11507	LC/MS Pos Late	1482	478.293	0	2	0.01	0.03	0.63	-0.01	0.02	0.51	0.02	0.04	0.54	0.02	0.03	0.4	0.01	0.01	0.68	0.01	0.02	0.52	0	0.02	0.81	-0.01	0.02	0.71	0.02	0.02	0.36	1.7e-05	6.2e-08	0.07	1.08	0.95	-0.46	0.58	0.43	-0.89	1.57	0.57
Lipid	Lysophospholipid	1-linoleoyl-GPG (18:2)*	54885				LC/MS Neg	5516	507.273	0.1586	2	0	0.04	0.9	-0.03	0.02	0.26	-0.05	0.05	0.41	-0.08	0.03	0.022	-0.05	0.02	0.0049	-0.03	0.03	0.39	-0.05	0.02	0.015	-0.02	0.02	0.28	-0.08	0.03	0.004	3.6e-06	2e-06	0.96	1.34	0.47	-0.78	0.67	0.25	0.87	2.2	0.69
Lipid	Lysophospholipid	1-linoleoyl-GPI (18:2)*	36594				LC/MS Neg	5494	595.289	0	2	0.01	0.02	0.83	0.01	0.02	0.46	0.01	0.04	0.7	-0.03	0.03	0.35	0	0.01	0.78	0	0.02	0.92	0	0.02	0.94	0.01	0.02	0.55	-0.02	0.02	0.43	4.6e-06	3.9e-06	0.45	0.92	0.63	0.1	0.56	0.86	-0.28	1.49	0.85
Lipid	Lysophospholipid	1-oleoyl-GPC (18:1)	48258	16081932		HMDB02815	LC/MS Pos Late	1540	522.355	0	1	-0.04	0.05	0.45	0	0.04	0.92	0.05	0.06	0.43	0.1	0.05	0.03	0.03	0.02	0.2	0	0.04	0.92	0.05	0.03	0.094	-0.01	0.03	0.74	0.08	0.04	0.035	3.7e-07	8.2e-09	-1.81	1.8	0.32	-1.03	1.07	0.33	-1.04	2.54	0.68
Lipid	Lysophospholipid	1-oleoyl-GPE (18:1)	35628	9547071		HMDB11506	LC/MS Pos Late	1554	480.308	0.0793	1	0.01	0.02	0.77	-0.05	0.02	0.0055	0.01	0.02	0.61	0	0.02	0.87	-0.01	0.01	0.23	0.01	0.02	0.72	-0.02	0.01	0.12	-0.03	0.01	0.033	0	0.02	0.89	0.00011	1.7e-08	-0.02	0.87	0.98	-1.05	0.53	0.048	-0.53	1	0.6
Lipid	Lysophospholipid	1-oleoyl-GPG (18:1)*	45968				LC/MS Neg	5610	509.288	29.9762	2	0	0.02	0.98	-0.01	0.02	0.37	-0.02	0.03	0.51	-0.05	0.02	0.021	-0.03	0.01	0.0051	-0.02	0.02	0.33	-0.03	0.01	0.017	-0.01	0.01	0.41	-0.05	0.02	0.0047	0.00016	0.00038	-0.56	0.83	0.5	-0.51	0.44	0.24	-1.57	1.27	0.22
Lipid	Lysophospholipid	1-oleoyl-GPI (18:1)*	36602				LC/MS Neg	5599	597.305	0	2	0.01	0.02	0.71	0.01	0.01	0.7	0.02	0.03	0.54	0	0.02	0.96	0	0.01	0.9	0	0.01	0.85	0	0.01	0.8	0	0.01	0.66	0	0.02	0.99	1.2e-05	4.6e-06	0.25	0.65	0.7	-0.27	0.41	0.51	-1.49	1.1	0.18
Lipid	Lysophospholipid	1-palmitoleoyl-GPC (16:1)*	33230	24779461		HMDB10383	LC/MS Pos Late	1450	494.324	0	2	0	0.03	0.98	-0.03	0.02	0.097	-0.02	0.03	0.52	-0.01	0.02	0.68	-0.02	0.01	0.057	-0.02	0.02	0.46	-0.02	0.01	0.13	-0.02	0.01	0.093	-0.02	0.02	0.37	2.6e-06	7.5e-07	-0.83	1.23	0.5	-0.36	0.44	0.41	-0.44	1.33	0.74
Lipid	Lysophospholipid	1-palmitoyl-GPC (16:0)	33955	86554		HMDB10382	LC/MS Pos Late	1525	496.34	0	1	0.05	0.07	0.5	0.06	0.05	0.27	0.08	0.1	0.43	0.16	0.07	0.023	0.09	0.03	0.006	0.07	0.06	0.24	0.11	0.04	0.015	0.06	0.04	0.19	0.14	0.06	0.015	6.1e-06	1.2e-08	-0.79	2.59	0.76	0.09	1.55	0.95	2.83	4.28	0.51
Lipid	Lysophospholipid	1-palmitoyl-GPE (16:0)	35631	9547069		HMDB11503	LC/MS Pos Late	1544	454.293	0	1	0.03	0.03	0.34	-0.05	0.02	0.016	-0.02	0.05	0.67	0	0.03	0.91	-0.02	0.01	0.21	0.01	0.02	0.71	-0.03	0.02	0.11	-0.03	0.02	0.11	-0.01	0.03	0.76	1.5e-05	2.2e-07	-0.61	1.03	0.55	-0.8	0.58	0.17	-1.56	2.01	0.44
Lipid	Lysophospholipid	1-palmitoyl-GPG (16:0)*	45970	3300276			LC/MS Neg	5570	483.273	9.7542	2	0.01	0.02	0.78	-0.04	0.01	0.0036	-0.04	0.03	0.25	-0.04	0.02	0.11	-0.03	0.01	0.0012	-0.01	0.02	0.49	-0.04	0.01	0.0016	-0.03	0.01	0.017	-0.04	0.02	0.021	0.00021	3.1e-06	-0.21	0.76	0.79	-1.15	0.42	0.0066	-0.12	1.37	0.93
Lipid	Lysophospholipid	1-palmitoyl-GPI (16:0)	35305			HMDB61695	LC/MS Neg	5564	571.289	0.1586	1	0.01	0.02	0.53	0	0.01	0.73	-0.02	0.03	0.54	0.01	0.02	0.77	0	0.01	0.7	0	0.01	0.9	0	0.01	0.88	0	0.01	0.92	-0.01	0.02	0.73	2.8e-05	9.6e-06	0.13	0.56	0.82	0	0.32	1	-1.75	1.22	0.15
Lipid	Lysophospholipid	1-stearoyl-GPC (18:0)	33961	497299		HMDB10384	LC/MS Pos Late	1606	524.371	0	1	-0.03	0.06	0.54	0.04	0.05	0.34	0.14	0.08	0.092	0.22	0.06	0.00046	0.09	0.03	0.0011	0.05	0.05	0.28	0.12	0.04	0.0014	0.02	0.04	0.67	0.2	0.05	6.2e-05	7.7e-07	6.6e-10	-0.7	2.16	0.75	-0.43	1.3	0.74	3.46	3.52	0.33
Lipid	Lysophospholipid	1-stearoyl-GPE (18:0)	42398	9547068		HMDB11130	LC/MS Pos Late	1626	482.324	0	1	-0.01	0.03	0.77	-0.05	0.02	0.039	-0.02	0.05	0.74	0.01	0.03	0.73	-0.02	0.02	0.17	-0.01	0.03	0.68	-0.02	0.02	0.23	-0.04	0.02	0.048	0	0.03	0.93	3.4e-06	5.3e-08	-1.33	1.11	0.23	-0.88	0.66	0.18	-1.1	1.97	0.58
Lipid	Lysophospholipid	1-stearoyl-GPG (18:0)	34437				LC/MS Neg	5816	511.304	19.5876	1	-0.01	0.02	0.61	-0.01	0.02	0.59	-0.04	0.03	0.26	-0.01	0.02	0.55	-0.02	0.01	0.14	-0.02	0.02	0.27	-0.01	0.01	0.4	-0.01	0.01	0.39	-0.02	0.02	0.18	9.9e-06	3.2e-06	-1.07	0.75	0.16	-0.7	0.47	0.14	0.79	1.37	0.57
Lipid	Lysophospholipid	1-stearoyl-GPI (18:0)	19324			HMDB61696	LC/MS Neg	5794	599.32	0	1	-0.01	0.02	0.76	0.04	0.02	0.045	0	0.04	0.9	0.05	0.03	0.1	0.02	0.01	0.087	-0.01	0.02	0.77	0.04	0.02	0.012	0.02	0.01	0.17	0.02	0.02	0.28	1e-07	1.4e-07	-0.15	0.81	0.85	-0.23	0.5	0.65	-1.38	1.54	0.37
Lipid	Lysophospholipid	1-stearoyl-GPS (18:0)*	45966	9547101			LC/MS Neg	5800	524.299	61.142	2	-0.01	0.01	0.48	0.02	0.01	0.11	-0.02	0.02	0.36	0.03	0.02	0.098	0.01	0.01	0.25	-0.01	0.01	0.33	0.02	0.01	0.029	0.01	0.01	0.49	0.01	0.01	0.29	6.5e-08	1.6e-07	-0.64	0.56	0.25	-0.16	0.34	0.63	-1.26	0.9	0.16
Lipid	Lysophospholipid	2-palmitoleoyl-GPC (16:1)*	47118			HMDB10383	LC/MS Neg	5720	568.326	27.6764	2	-0.02	0.02	0.28	-0.01	0.01	0.16	0	0.02	0.92	0	0.02	0.85	-0.01	0.01	0.096	-0.01	0.01	0.41	-0.01	0.01	0.23	-0.02	0.01	0.062	-0.01	0.01	0.7	0.0001	4.1e-05	-1.16	0.73	0.12	-0.2	0.27	0.45	-0.31	0.86	0.72
Lipid	Lysophospholipid	2-palmitoyl-GPC (16:0)*	35253	15061532		HMDB61702	LC/MS Neg	6215	570.341	0	2	0.03	0.04	0.45	0.07	0.03	0.029	0.04	0.07	0.56	0.07	0.04	0.13	0.06	0.02	0.0062	0.03	0.03	0.32	0.06	0.03	0.011	0.05	0.02	0.024	0.06	0.04	0.1	4e-06	9e-08	0.58	1.53	0.71	-0.06	0.83	0.94	2.99	2.75	0.28
Lipid	Lysophospholipid	2-stearoyl-GPE (18:0)*	41220			HMDB11129	LC/MS Neg	6350	480.31	2.3791	2	-0.03	0.02	0.23	-0.01	0.02	0.71	0	0.04	0.96	0.01	0.03	0.71	-0.01	0.01	0.43	-0.02	0.02	0.32	0	0.02	0.99	-0.01	0.01	0.28	0	0.03	0.99	8.7e-07	2.5e-07	-1.52	0.8	0.059	-0.3	0.49	0.54	-1.89	1.67	0.26
Lipid	Lysoplasmalogen	1-(1-enyl-oleoyl)-GPE (P-18:1)*	44621				LC/MS Pos Late	1566	464.314	0	2	0.01	0.02	0.43	0.03	0.01	0.061	0.05	0.04	0.26	0.08	0.02	0.00059	0.04	0.01	0.0002	0.02	0.01	0.15	0.04	0.01	0.00042	0.02	0.01	0.05	0.08	0.02	0.00018	2.9e-08	1.1e-09	-0.38	0.6	0.53	0.53	0.42	0.21	1.87	1.73	0.28
Lipid	Lysoplasmalogen	1-(1-enyl-palmitoyl)-GPC (P-16:0)*	52474	10917802		HMDB10407	LC/MS Pos Late	1547	480.345	0	2	0	0.02	0.9	0.02	0.02	0.31	0.09	0.05	0.092	0.13	0.03	6.4e-05	0.04	0.01	0.0011	0.02	0.02	0.37	0.05	0.02	0.0011	0.01	0.01	0.37	0.12	0.03	4.8e-06	2.7e-08	8.8e-11	-0.15	0.75	0.84	0.42	0.55	0.44	0.98	2.26	0.67
Lipid	Lysoplasmalogen	1-(1-enyl-palmitoyl)-GPE (P-16:0)*	39270				LC/MS Pos Late	1558	438.298	0	2	0.01	0.02	0.56	0.03	0.02	0.11	0.08	0.05	0.095	0.08	0.03	0.0013	0.04	0.01	0.00017	0.03	0.02	0.11	0.05	0.02	0.00083	0.02	0.01	0.11	0.09	0.02	0.0001	2.9e-08	1.9e-09	-0.28	0.78	0.73	0.76	0.53	0.15	3	2.03	0.14
Lipid	Lysoplasmalogen	1-(1-enyl-stearoyl)-GPE (P-18:0)*	39271				LC/MS Pos Late	1649	466.329	0	2	0	0.02	0.85	0.03	0.02	0.056	0.06	0.04	0.17	0.1	0.03	0.00019	0.04	0.01	0.00021	0.02	0.02	0.31	0.05	0.01	0.0002	0.02	0.01	0.093	0.09	0.02	3.4e-05	5.9e-09	8.4e-10	-0.27	0.7	0.7	0.58	0.45	0.2	3.4	1.85	0.067
Lipid	Medium Chain Fatty Acid	10-undecenoate (11:1n1)	32497	14891	C13910	HMDB33724	LC/MS Neg	5085.8	183.139	0	1	-0.02	0.03	0.5	0.05	0.02	0.0031	0.02	0.04	0.67	0.02	0.02	0.29	0.03	0.01	0.017	-0.01	0.02	0.71	0.04	0.01	0.0076	0.03	0.01	0.018	0.02	0.02	0.21	3.1e-07	5.9e-07	0.4	0.97	0.68	1.21	0.52	0.021	0.28	1.4	0.84
Lipid	Medium Chain Fatty Acid	5-dodecenoate (12:1n7)	33968	5312378		HMDB00529	LC/MS Neg	5224	197.155	0	1	0	0.01	0.78	-0.01	0.01	0.37	-0.07	0.03	0.026	-0.02	0.01	0.13	-0.02	0.01	0.026	-0.02	0.01	0.18	-0.01	0.01	0.065	-0.01	0.01	0.54	-0.03	0.01	0.022	2.7e-05	0.0033	-0.02	0.58	0.97	-0.04	0.28	0.89	-1.22	1.28	0.34
Lipid	Medium Chain Fatty Acid	Caprate (10:0)	1642	2969	C01571	HMDB00511	LC/MS Neg	5090.7	171.139	0	1	0.04	0.03	0.18	0.04	0.02	0.092	-0.07	0.06	0.21	0.02	0.02	0.5	0.02	0.01	0.14	0	0.03	0.89	0.02	0.02	0.13	0.04	0.02	0.032	0	0.02	0.93	5.1e-06	1.3e-06	0.48	1.09	0.66	0.14	0.64	0.83	0.31	2.5	0.9
Lipid	Medium Chain Fatty Acid	Caproate (6:0)	32489	8892	C01585	HMDB00535	LC/MS Neg	2713.7	115.076	0	1	0	0.03	0.92	0.02	0.01	0.083	-0.05	0.05	0.35	-0.04	0.03	0.26	0	0.01	0.7	-0.03	0.03	0.32	0.01	0.01	0.43	0.02	0.01	0.095	-0.04	0.03	0.11	7.4e-07	1.2e-05	-0.91	1.21	0.45	-0.12	0.39	0.76	1.94	2.25	0.39
Lipid	Medium Chain Fatty Acid	Caprylate (8:0)	32492	379	C06423	HMDB00482	LC/MS Neg	4362	143.108	0.0793	1	0.02	0.02	0.28	0	0	0.13	-0.04	0.05	0.43	-0.01	0.02	0.77	0	0	0.23	0	0.02	0.86	0	0	0.21	0	0	0.1	-0.02	0.02	0.35	2.3e-05	2.5e-05	0.06	0.84	0.95	-0.02	0.08	0.8	-0.89	2.16	0.68
Lipid	Medium Chain Fatty Acid	Cis-4-decenoate (10:1n6)*	48992				LC/MS Neg	4886	169.123	0.0793	2	0.01	0.01	0.4	0	0	0.11	-0.02	0.02	0.45	-0.02	0.02	0.19	0	0	0.3	0	0.01	0.83	0	0	0.28	0	0	0.097	-0.02	0.01	0.12	0.00068	0.0027	-0.07	0.37	0.85	0	0.07	1	0.07	1.03	0.95
Lipid	Medium Chain Fatty Acid	Heptanoate (7:0)	1644	8094	C17714	HMDB00666	LC/MS Neg	3670	129.092	0	1	.	.	.	.	.	.	.	.	.	.	.	.	.	.	.	.	.	.	.	.	.	.	.	.	.	.	.	.	.	.	.	.	.	.	.	.	.	.
Lipid	Medium Chain Fatty Acid	Laurate (12:0)	1645	3893	C02679	HMDB00638	LC/MS Neg	5300	199.17	0	1	-0.01	0.02	0.76	0	0.01	0.77	-0.01	0.03	0.78	0.02	0.02	0.32	0	0.01	0.61	-0.01	0.02	0.43	0.01	0.01	0.45	0	0.01	0.83	0.01	0.02	0.57	2e-05	4.2e-07	0.61	0.75	0.41	0.09	0.22	0.68	-0.01	1.13	0.99
Lipid	Medium Chain Fatty Acid	Pelargonate (9:0)	12035	8158	C01601	HMDB00847	LC/MS Neg	4798	157.123	0	1	.	.	.	.	.	.	.	.	.	.	.	.	.	.	.	.	.	.	.	.	.	.	.	.	.	.	.	.	.	.	.	.	.	.	.	.	.	.
Lipid	Mevalonate Metabolism	3-hydroxy-3-methylglutarate	531	1662	C03761	HMDB00355	LC/MS Polar	2850	161.046	0	1	-0.02	0.03	0.48	-0.09	0.03	0.00044	-0.01	0.01	0.35	-0.1	0.02	5.4e-05	-0.02	0.01	0.0021	-0.01	0.01	0.41	-0.09	0.02	5.3e-07	-0.07	0.02	0.00048	-0.02	0.01	0.02	0.14	3.3e-10	-2.49	1.24	0.046	-2.15	0.72	0.0029	-0.19	0.47	0.69
Lipid	Modified Peptides	Pyroglutamylalanine*	47211				LC/MS Neg	1007	199.073	91.9112	2	.	.	.	.	.	.	.	.	.	.	.	.	.	.	.	.	.	.	.	.	.	.	.	.	.	.	.	.	.	.	.	.	.	.	.	.	.	.
Lipid	Modified Peptides	Pyroglutamylproline*	53110				LC/MS Pos Early	1588	227.102	34.9722	2	0	0	0.68	-0.01	0	0.28	0	0.01	0.86	-0.01	0.01	0.26	0	0	0.3	0	0	0.89	-0.01	0	0.11	0	0	0.6	0	0	0.31	0.37	0.052	-0.24	0.14	0.081	-0.01	0.13	0.92	-0.05	0.22	0.83
Lipid	Modified Peptides	Pyroglutamyltyrosine*	47219				LC/MS Neg	1717	291.099	99.1277	2	.	.	.	.	.	.	.	.	.	.	.	.	.	.	.	.	.	.	.	.	.	.	.	.	.	.	.	.	.	.	.	.	.	.	.	.	.	.
Lipid	Monoacylglycerol	1-arachidonylglycerol (20:4)	34397	5282281	C13857	HMDB11549	LC/MS Neg	6250	303.233	0.3172	1	-0.01	0.01	0.64	0	0.01	0.91	-0.01	0.02	0.55	0.03	0.03	0.24	0	0.01	0.98	-0.01	0.01	0.42	0.01	0.01	0.6	0	0.01	0.88	0	0.02	0.81	4.4e-06	1.8e-06	0.26	0.57	0.65	-0.03	0.32	0.93	-0.03	1.05	0.98
Lipid	Monoacylglycerol	1-dihomo-linolenylglycerol (20:3)	48341				LC/MS Neg	6400	305.249	2.6963	1	0.01	0.02	0.74	0	0.01	0.77	-0.02	0.04	0.54	0.01	0.02	0.53	0	0.01	0.76	0	0.02	0.87	0	0.01	0.66	0	0.01	0.69	0	0.02	0.89	4.4e-05	2.2e-06	0.11	0.62	0.86	0.11	0.29	0.71	-0.31	1.66	0.85
Lipid	Monoacylglycerol	1-docosahexaenoylglycerol (22:6)	35153			HMDB11587	LC/MS Neg	6150	309.222	36.6376	1	0	0.01	0.96	0.01	0.01	0.45	-0.02	0.03	0.63	0.01	0.02	0.57	0.01	0.01	0.47	0	0.01	0.86	0.01	0.01	0.39	0.01	0.01	0.5	0	0.02	0.99	9.9e-05	8.5e-05	0.23	0.46	0.61	0.12	0.27	0.66	0.82	1.4	0.56
Lipid	Monoacylglycerol	1-linolenoylglycerol (18:3)	34393	53480978		HMDB11569	LC/MS Neg	6214	277.217	19.1911	1	-0.02	0.02	0.25	0	0.01	0.79	0.01	0.03	0.65	0.02	0.02	0.23	0	0.01	0.97	-0.01	0.02	0.63	0.01	0.01	0.56	-0.01	0.01	0.34	0.01	0.01	0.33	1.5e-05	5.6e-08	-0.97	0.54	0.072	0.21	0.33	0.53	1.03	1.07	0.34
Lipid	Monoacylglycerol	1-linoleoylglycerol (18:2)	27447	5283469			LC/MS Neg	6477	279.233	0	1	0	0.02	0.9	0.01	0.01	0.37	0	0.03	0.91	0.01	0.02	0.7	0.01	0.01	0.41	0.01	0.02	0.72	0.01	0.01	0.41	0.01	0.01	0.42	0	0.02	0.83	1.4e-05	4.2e-07	-1.47	0.79	0.063	0.24	0.4	0.56	1.31	1.3	0.32
Lipid	Monoacylglycerol	1-myristoylglycerol (14:0)	35625	79050	C01885	HMDB11561	LC/MS Neg	6353.3	227.202	32.276	1	0.01	0.02	0.57	-0.02	0.01	0.14	0.01	0.02	0.54	0.01	0.01	0.63	0	0.01	0.78	0.01	0.01	0.43	0	0.01	0.57	-0.01	0.01	0.21	0.01	0.01	0.55	0.0046	5.9e-07	-0.28	0.68	0.68	-0.13	0.31	0.68	0.05	0.99	0.96
Lipid	Monoacylglycerol	1-oleoylglycerol (18:1)	21184	5283468		HMDB11567	LC/MS Neg	6650	281.249	0	1	-0.03	0.02	0.097	-0.01	0.01	0.39	0.01	0.02	0.57	0.01	0.02	0.47	-0.01	0.01	0.43	-0.01	0.01	0.43	0	0.01	0.84	-0.02	0.01	0.089	0.01	0.01	0.55	1.6e-05	9.3e-09	-1.15	0.57	0.044	-0.01	0.31	0.97	0.79	0.9	0.38
Lipid	Monoacylglycerol	1-palmitoleoylglycerol (16:1)*	52431			HMDB11565	LC/MS Neg	6094	253.217	10.7058	2	-0.01	0.01	0.5	-0.01	0.01	0.04	0	0.02	0.98	-0.01	0.01	0.59	-0.01	0	0.027	-0.01	0.01	0.53	-0.01	0.01	0.066	-0.01	0.01	0.017	-0.01	0.01	0.4	0.00041	9e-06	-0.97	0.5	0.052	-0.17	0.19	0.36	0.11	0.71	0.87
Lipid	Monoacylglycerol	1-palmitoylglycerol (16:0)	21127	14900		HMDB31074	LC/MS Neg	6550	255.233	0.3172	1	-0.02	0.02	0.19	0	0.01	0.72	-0.01	0.02	0.69	-0.01	0.02	0.68	-0.01	0.01	0.36	-0.02	0.01	0.17	0	0.01	0.88	0	0.01	0.63	-0.01	0.01	0.43	4.6e-06	3.2e-06	0.16	0.58	0.79	0.45	0.39	0.24	0.4	0.98	0.68
Lipid	Monoacylglycerol	2-arachidonoylglycerol (20:4)	19266	5282280	C13856	HMDB04666	LC/MS Neg	6170	303.233	20.222	1	-0.01	0.01	0.41	0.01	0.01	0.44	0	0.02	0.95	0.06	0.02	0.0044	0.01	0.01	0.21	-0.01	0.01	0.54	0.03	0.01	0.012	0	0.01	0.95	0.03	0.01	0.052	8.1e-08	6.4e-08	-0.64	0.44	0.15	0.21	0.38	0.59	-0.66	0.86	0.44
Lipid	Monoacylglycerol	2-linoleoylglycerol (18:2)	32506	5365676		HMDB11538	LC/MS Neg	6250	279.233	3.8858	1	0	0.02	0.93	0.01	0.01	0.54	-0.02	0.03	0.46	0.05	0.02	0.036	0.01	0.01	0.33	-0.01	0.02	0.42	0.02	0.01	0.12	0.01	0.01	0.59	0.02	0.02	0.26	4.8e-07	2.7e-07	-1.27	0.82	0.13	0.36	0.34	0.3	-1.33	1.24	0.28
Lipid	Monoacylglycerol	2-oleoylglycerol (18:1)	21232	5319879		HMDB11537	LC/MS Neg	6500	281.249	26.5662	1	-0.01	0.01	0.38	-0.01	0.01	0.34	0.01	0.02	0.55	0.02	0.01	0.18	0	0.01	0.94	0	0.01	0.83	0	0.01	0.76	-0.01	0.01	0.21	0.01	0.01	0.21	0.00035	6.3e-07	-0.86	0.45	0.057	0.23	0.25	0.35	0.68	0.68	0.31
Lipid	Monoacylglycerol	2-palmitoylglycerol (16:0)	33419	123409		HMDB11533	LC/MS Neg	6400	255.233	29.8176	1	-0.01	0.02	0.42	0	0.01	0.72	0.01	0.03	0.67	0.03	0.02	0.11	0.01	0.01	0.46	-0.01	0.02	0.73	0.01	0.01	0.29	0	0.01	0.92	0.03	0.02	0.13	2.1e-05	5.5e-07	-0.65	0.68	0.34	0.31	0.29	0.29	-1.74	1.16	0.13
Lipid	Phosphatidylcholine (PC)	1,2-dilinoleoyl-GPC (18:2/18:2)	52603	5288075		HMDB08138	LC/MS Pos Late	2006	782.569	0.0793	1	0.01	0.04	0.85	0.07	0.03	0.0099	0.05	0.05	0.3	0.09	0.04	0.018	0.06	0.02	0.00063	0.02	0.03	0.4	0.08	0.02	0.00058	0.05	0.02	0.016	0.08	0.03	0.01	8.1e-07	6.6e-08	-0.18	1.36	0.9	0.82	0.73	0.26	0.61	2.05	0.77
Lipid	Phosphatidylcholine (PC)	1,2-dipalmitoyl-GPC (16:0/16:0)	19130	452110	D03585	HMDB00564	LC/MS Pos Late	2365	734.569	0	1	0.11	0.07	0.11	-0.05	0.05	0.28	-0.17	0.1	0.078	-0.1	0.06	0.088	-0.06	0.03	0.042	-0.03	0.06	0.58	-0.08	0.04	0.034	0	0.04	0.97	-0.12	0.05	0.017	1.2e-06	1.1e-07	1.44	2.63	0.58	0.29	1.36	0.83	-6.36	3.34	0.059
Lipid	Phosphatidylcholine (PC)	1-linoleoyl-2-arachidonoyl-GPC (18:2/20:4n6)*	52710			HMDB08147	LC/MS Pos Late	1969	806.569	0	2	0.03	0.05	0.54	0.1	0.04	0.0087	0.11	0.06	0.066	0.18	0.05	0.00037	0.11	0.02	2.4e-06	0.07	0.04	0.052	0.13	0.03	1.6e-05	0.07	0.03	0.0096	0.16	0.04	6e-05	6.1e-08	1.4e-09	2.9	1.77	0.1	2.27	1.05	0.031	4.57	2.52	0.072
Lipid	Phosphatidylcholine (PC)	1-linoleoyl-2-linolenoyl-GPC (18:2/18:3)*	53176			HMDB08141	LC/MS Pos Late	1939	780.554	1.1102	2	0	0.02	0.84	0.02	0.01	0.07	0.05	0.02	0.039	0.04	0.02	0.032	0.03	0.01	0.0023	0.02	0.02	0.22	0.03	0.01	0.0047	0.02	0.01	0.12	0.04	0.02	0.0048	1.1e-05	1.7e-08	0.48	0.71	0.5	0.35	0.33	0.29	0.51	1.07	0.63
Lipid	Phosphatidylcholine (PC)	1-myristoyl-2-arachidonoyl-GPC (14:0/20:4)*	53195			HMDB07883	LC/MS Pos Late	1914	754.538	0	2	0.04	0.02	0.067	0	0.01	0.8	0.04	0.03	0.27	0.03	0.02	0.21	0.02	0.01	0.093	0.04	0.02	0.043	0.01	0.01	0.36	0.01	0.01	0.33	0.03	0.02	0.14	0.0004	1.8e-08	2.48	0.82	0.0028	0.01	0.4	0.98	0.93	1.38	0.5
Lipid	Phosphatidylcholine (PC)	1-myristoyl-2-palmitoyl-GPC (14:0/16:0)	19258	129657		HMDB07869	LC/MS Pos Late	2147	706.538	0.0793	1	0.02	0.02	0.23	-0.01	0.01	0.2	-0.01	0.02	0.62	0	0.02	0.86	-0.01	0.01	0.36	0	0.01	0.89	-0.01	0.01	0.29	-0.01	0.01	0.53	-0.01	0.01	0.57	0.00017	6.3e-06	0.79	0.7	0.26	-0.13	0.32	0.67	-0.84	0.99	0.4
Lipid	Phosphatidylcholine (PC)	1-oleoyl-2-docosahexaenoyl-GPC (18:1/22:6)*	52697			HMDB08123	LC/MS Pos Late	2011	832.585	0	2	0.01	0.04	0.8	0.03	0.03	0.23	0.12	0.06	0.058	0.07	0.04	0.063	0.05	0.02	0.0063	0.05	0.03	0.14	0.05	0.02	0.02	0.03	0.02	0.23	0.07	0.03	0.019	3e-06	1.5e-09	0.97	1.55	0.53	0.65	0.78	0.41	2.59	2.68	0.34
Lipid	Phosphatidylcholine (PC)	1-palmitoleoyl-2-linolenoyl-GPC (16:1/18:3)*	53180			HMDB08008	LC/MS Pos Late	1850	754.538	7.613	2	0	0.03	0.99	0.01	0.01	0.44	0.03	0.03	0.34	0.04	0.03	0.11	0.02	0.01	0.12	0.01	0.02	0.61	0.02	0.01	0.12	0.01	0.01	0.48	0.04	0.02	0.074	5.9e-05	1.8e-08	0.43	0.98	0.66	0.69	0.37	0.064	-0.17	1.45	0.91
Lipid	Phosphatidylcholine (PC)	1-palmitoyl-2-arachidonoyl-GPC (16:0/20:4n6)	52462	10747814		HMDB07982	LC/MS Pos Late	2091	782.569	0	1	0.09	0.07	0.24	-0.08	0.05	0.15	0.02	0.11	0.89	-0.05	0.08	0.54	-0.03	0.04	0.42	0.07	0.06	0.28	-0.07	0.05	0.12	-0.03	0.04	0.51	-0.04	0.06	0.54	5.8e-06	2.1e-08	3.67	2.76	0.19	-0.66	1.55	0.67	7.11	4.76	0.14
Lipid	Phosphatidylcholine (PC)	1-palmitoyl-2-dihomo-linolenoyl-GPC (16:0/20:3n3 or 6)*	52454				LC/MS Pos Late	2199	784.585	0	2	-0.01	0.06	0.85	-0.06	0.04	0.17	0.08	0.11	0.48	0.08	0.07	0.25	-0.01	0.03	0.69	0	0.06	0.95	-0.01	0.04	0.77	-0.05	0.04	0.16	0.07	0.06	0.2	2.8e-06	2.4e-09	-1.05	2.46	0.67	-1.38	1.26	0.27	1.7	4.58	0.71
Lipid	Phosphatidylcholine (PC)	1-palmitoyl-2-docosahexaenoyl-GPC (16:0/22:6)	52610	6441886		HMDB07991	LC/MS Pos Late	2023	806.569	0	1	0.11	0.05	0.033	0.03	0.04	0.4	0.03	0.08	0.68	0.03	0.05	0.55	0.05	0.02	0.034	0.09	0.04	0.031	0.03	0.03	0.26	0.06	0.03	0.061	0.03	0.04	0.51	2.4e-06	1.8e-08	3.91	1.99	0.051	-0.1	1.05	0.92	4.51	3.47	0.2
Lipid	Phosphatidylcholine (PC)	1-palmitoyl-2-gamma-linolenoyl-GPC (16:0/18:3n6)*	54812			HMDB07974	LC/MS Pos Late	2034	756.554	31.3243	2	0.03	0.03	0.3	-0.04	0.02	0.0076	0	0.04	0.96	0.02	0.02	0.39	-0.01	0.01	0.34	0.02	0.02	0.37	-0.02	0.01	0.2	-0.03	0.01	0.045	0.01	0.02	0.47	0.00066	8.4e-09	1.02	0.98	0.3	-0.41	0.45	0.36	-1.72	1.64	0.29
Lipid	Phosphatidylcholine (PC)	1-palmitoyl-2-linoleoyl-GPC (16:0/18:2)	42446	5287971		HMDB07973	LC/MS Pos Late	2160	758.569	0	1	0.17	0.09	0.071	0.12	0.07	0.075	0.04	0.15	0.78	-0.02	0.1	0.86	0.08	0.05	0.095	0.11	0.08	0.17	0.06	0.06	0.26	0.14	0.05	0.014	-0.01	0.08	0.93	2.2e-05	1.9e-08	0.67	3.52	0.85	2.47	1.95	0.2	1.27	6.24	0.84
Lipid	Phosphatidylcholine (PC)	1-palmitoyl-2-oleoyl-GPC (16:0/18:1)	52461	6436017		HMDB07972	LC/MS Pos Late	2358	760.585	0	1	-0.01	0.06	0.84	-0.11	0.04	0.0072	-0.19	0.08	0.02	-0.08	0.06	0.14	-0.1	0.03	0.00016	-0.09	0.05	0.044	-0.1	0.03	0.0029	-0.08	0.03	0.013	-0.13	0.05	0.0065	7.2e-08	1.7e-07	-0.85	2.19	0.7	-2.23	1.2	0.065	-3.24	3.42	0.35
Lipid	Phosphatidylcholine (PC)	1-palmitoyl-2-palmitoleoyl-GPC (16:0/16:1)*	52470			HMDB07969	LC/MS Pos Late	2160	732.554	0	2	0.01	0.02	0.69	-0.03	0.01	0.0028	-0.05	0.02	0.049	-0.04	0.02	0.032	-0.03	0.01	1.8e-05	-0.02	0.01	0.11	-0.03	0.01	0.00023	-0.03	0.01	0.0061	-0.04	0.01	0.0016	6.9e-06	0.00014	-0.19	0.78	0.8	-0.39	0.31	0.21	-1.28	0.98	0.19
Lipid	Phosphatidylcholine (PC)	1-palmitoyl-2-stearoyl-GPC (16:0/18:0)	52616			HMDB07970	LC/MS Pos Late	2653	762.601	0.3965	1	-0.01	0.05	0.89	-0.01	0.04	0.87	0	0.07	0.96	0.02	0.05	0.66	0	0.02	0.94	0	0.04	0.97	0	0.03	0.93	-0.01	0.03	0.83	0.02	0.04	0.66	1.4e-06	3.2e-08	0.96	1.78	0.59	-1.02	1	0.31	3.24	2.89	0.26
Lipid	Phosphatidylcholine (PC)	1-stearoyl-2-arachidonoyl-GPC (18:0/20:4)	42450	16219824		HMDB08048	LC/MS Pos Late	2300	810.601	0	1	-0.11	0.08	0.18	-0.09	0.06	0.13	0.15	0.11	0.2	0.04	0.09	0.64	-0.02	0.04	0.63	0.03	0.07	0.66	-0.04	0.05	0.44	-0.1	0.05	0.045	0.07	0.07	0.31	5.2e-06	1.7e-09	3.72	3.06	0.23	-1.16	1.73	0.5	9.41	4.7	0.047
Lipid	Phosphatidylcholine (PC)	1-stearoyl-2-docosahexaenoyl-GPC (18:0/22:6)	52611			HMDB08057	LC/MS Pos Late	2197	834.601	0	1	0.01	0.03	0.79	-0.02	0.03	0.38	0.06	0.06	0.26	0.02	0.04	0.6	0.01	0.02	0.52	0.04	0.03	0.14	0	0.02	0.95	-0.01	0.02	0.52	0.03	0.03	0.31	1.4e-05	2.2e-09	2.04	1.3	0.12	-0.63	0.75	0.4	2.87	2.43	0.24
Lipid	Phosphatidylcholine (PC)	1-stearoyl-2-linoleoyl-GPC (18:0/18:2)*	52452			HMDB08039	LC/MS Pos Late	2380	786.601	0	2	0.01	0.09	0.89	0.17	0.07	0.016	0.26	0.14	0.064	0.13	0.1	0.18	0.14	0.05	0.0023	0.12	0.08	0.12	0.15	0.06	0.0086	0.12	0.05	0.036	0.17	0.08	0.032	1.6e-05	4.5e-09	1.8	3.42	0.6	2.21	1.99	0.27	4.51	5.76	0.43
Lipid	Phosphatidylcholine (PC)	1-stearoyl-2-oleoyl-GPC (18:0/18:1)	52438			HMDB08038	LC/MS Pos Late	2644	788.616	0	1	-0.03	0.04	0.43	-0.08	0.03	0.0016	-0.05	0.05	0.37	-0.01	0.04	0.69	-0.05	0.02	0.0019	-0.04	0.03	0.22	-0.05	0.02	0.011	-0.07	0.02	0.00096	-0.03	0.03	0.29	6.8e-07	8.3e-09	0.11	1.48	0.94	-1.67	0.73	0.023	-1.15	2.21	0.6
Lipid	Phosphatidylethanolamine (PE)	1,2-dipalmitoyl-GPE (16:0/16:0)*	57341	445468		HMDB08923	LC/MS Pos Late	2498	692.522	79.9366	2	0.03	0.02	0.18	-0.05	0.01	0.00039	-0.02	0.03	0.39	-0.01	0.02	0.64	-0.02	0.01	0.012	0	0.02	0.97	-0.03	0.01	0.0043	-0.03	0.01	0.021	-0.02	0.02	0.23	0.00027	1.9e-07	0.46	0.71	0.52	-0.33	0.39	0.4	-1.62	1.16	0.17
Lipid	Phosphatidylethanolamine (PE)	1-oleoyl-2-arachidonoyl-GPE (18:1/20:4)*	55041			HMDB09069	LC/MS Pos Late	2200	766.538	31.4036	2	-0.01	0.01	0.33	-0.04	0.01	0.0014	-0.01	0.02	0.52	-0.01	0.02	0.52	-0.02	0.01	0.0017	-0.02	0.01	0.19	-0.03	0.01	0.0081	-0.03	0.01	0.0012	-0.02	0.01	0.18	0.0028	2.7e-05	-0.81	0.54	0.13	-0.52	0.32	0.1	-0.89	0.92	0.34
Lipid	Phosphatidylethanolamine (PE)	1-oleoyl-2-docosahexaenoyl-GPE (18:1/22:6)*	53209				LC/MS Pos Late	2119	790.538	40.6027	2	0.02	0.01	0.13	-0.02	0.01	0.004	-0.01	0.02	0.82	-0.02	0.02	0.24	-0.01	0.01	0.025	0.01	0.01	0.42	-0.02	0.01	0.0049	-0.01	0.01	0.04	-0.02	0.01	0.14	0.048	0.0017	-0.05	0.53	0.92	-0.33	0.21	0.12	0.15	0.96	0.88
Lipid	Phosphatidylethanolamine (PE)	1-palmitoyl-2-arachidonoyl-GPE (16:0/20:4)*	52464	9546800		HMDB05323	LC/MS Pos Late	2198	740.522	0	2	0	0.02	0.9	-0.05	0.01	7.1e-05	-0.08	0.03	0.0097	-0.06	0.02	0.011	-0.05	0.01	2.9e-07	-0.03	0.02	0.059	-0.06	0.01	4.5e-06	-0.04	0.01	0.00059	-0.07	0.02	6.3e-05	0.00029	0.00037	-0.55	0.71	0.44	-0.71	0.39	0.068	-1.96	1.28	0.13
Lipid	Phosphatidylethanolamine (PE)	1-palmitoyl-2-docosahexaenoyl-GPE (16:0/22:6)*	52465	9546799		HMDB05324	LC/MS Pos Late	2119	764.522	0	2	0.02	0.02	0.26	-0.03	0.01	0.0067	-0.03	0.03	0.25	-0.05	0.02	0.017	-0.02	0.01	0.0026	0	0.02	0.95	-0.03	0.01	0.00068	-0.02	0.01	0.058	-0.05	0.02	0.0029	0.00091	0.00053	0.37	0.62	0.55	-0.39	0.3	0.2	-0.47	1.29	0.72
Lipid	Phosphatidylethanolamine (PE)	1-palmitoyl-2-linoleoyl-GPE (16:0/18:2)	42449	9546747		HMDB05322	LC/MS Pos Late	2275	716.522	0	1	0.01	0.02	0.52	-0.03	0.01	0.0082	-0.08	0.03	0.013	-0.05	0.02	0.01	-0.03	0.01	8.7e-05	-0.02	0.02	0.19	-0.03	0.01	0.0005	-0.02	0.01	0.031	-0.06	0.02	0.00012	1.6e-05	0.0019	-0.57	0.61	0.35	-0.24	0.29	0.41	-2.94	1.25	0.02
Lipid	Phosphatidylethanolamine (PE)	1-palmitoyl-2-oleoyl-GPE (16:0/18:1)	19263	5283496		HMDB05320	LC/MS Pos Late	2509	718.538	3.0928	1	0.01	0.01	0.66	-0.03	0.01	0.00027	-0.02	0.02	0.22	-0.03	0.01	0.019	-0.03	0.01	2.1e-05	-0.01	0.01	0.5	-0.03	0.01	2.7e-05	-0.02	0.01	0.0018	-0.03	0.01	0.0023	0.002	0.00011	-0.33	0.5	0.52	-0.42	0.25	0.093	-1.11	0.82	0.18
Lipid	Phosphatidylethanolamine (PE)	1-stearoyl-2-arachidonoyl-GPE (18:0/20:4)	52447	5289133		HMDB09003	LC/MS Pos Late	2424	768.554	0	1	-0.02	0.02	0.35	-0.07	0.02	0.00021	-0.06	0.04	0.11	-0.06	0.03	0.035	-0.06	0.01	3.3e-06	-0.04	0.02	0.072	-0.06	0.02	4.2e-05	-0.05	0.01	0.00017	-0.07	0.02	0.0028	7.4e-05	1.9e-06	-0.68	0.88	0.44	-0.74	0.51	0.15	-0.53	1.62	0.74
Lipid	Phosphatidylethanolamine (PE)	1-stearoyl-2-docosahexaenoyl-GPE (18:0/22:6)*	52466	9546798		HMDB05334	LC/MS Pos Late	2317	792.554	0	2	0.01	0.02	0.47	-0.03	0.01	0.0012	-0.02	0.03	0.5	-0.05	0.02	0.017	-0.03	0.01	0.00079	0	0.02	0.81	-0.04	0.01	0.00012	-0.02	0.01	0.01	-0.05	0.02	0.0071	0.0017	4.3e-05	0.36	0.6	0.55	-0.42	0.28	0.14	-0.06	1.38	0.97
Lipid	Phosphatidylethanolamine (PE)	1-stearoyl-2-linoleoyl-GPE (18:0/18:2)*	52446	9546749		HMDB08994	LC/MS Pos Late	2522	744.554	0	2	0	0.02	0.99	-0.04	0.01	0.0046	-0.04	0.04	0.29	-0.04	0.02	0.062	-0.03	0.01	0.00042	-0.02	0.02	0.42	-0.04	0.01	0.0011	-0.03	0.01	0.0091	-0.04	0.02	0.012	1.2e-05	4.9e-06	-0.73	0.71	0.3	-0.42	0.38	0.27	-2.52	1.47	0.089
Lipid	Phosphatidylethanolamine (PE)	1-stearoyl-2-oleoyl-GPE (18:0/18:1)	42448			HMDB08993	LC/MS Pos Late	2858	746.569	0	1	0.01	0.01	0.58	-0.02	0.01	0.0081	0	0.02	0.92	-0.01	0.01	0.34	-0.01	0.01	0.025	0	0.01	0.73	-0.02	0.01	0.012	-0.01	0.01	0.038	-0.01	0.01	0.22	0.003	3.3e-06	-0.13	0.42	0.75	-0.39	0.25	0.12	-0.82	0.78	0.3
Lipid	Phosphatidylinositol (PI)	1-oleoyl-2-linoleoyl-GPI (18:1/18:2)*	52451			HMDB09838	LC/MS Polar	902	859.534	0.7137	2	0.01	0.03	0.66	-0.03	0.02	0.071	0	0.04	0.98	-0.02	0.03	0.48	-0.02	0.01	0.076	0	0.02	0.87	-0.03	0.02	0.071	-0.02	0.02	0.12	-0.02	0.02	0.4	1.3e-05	1.2e-06	-0.31	1.13	0.78	-0.45	0.55	0.41	-1.33	1.8	0.46
Lipid	Phosphatidylinositol (PI)	1-palmitoyl-2-arachidonoyl-GPI (16:0/20:4)*	52467			HMDB09789	LC/MS Polar	892	857.519	0.3172	2	0.01	0.02	0.82	-0.05	0.02	0.00042	-0.06	0.04	0.15	-0.02	0.03	0.55	-0.04	0.01	0.0009	-0.01	0.02	0.57	-0.04	0.01	0.0021	-0.04	0.01	0.001	-0.03	0.02	0.19	1.3e-05	8.4e-07	0.2	0.96	0.83	-0.38	0.44	0.39	-0.83	1.79	0.64
Lipid	Phosphatidylinositol (PI)	1-palmitoyl-2-linoleoyl-GPI (16:0/18:2)	52450			HMDB09784	LC/MS Polar	910	833.518	0.2379	1	0.02	0.03	0.5	-0.05	0.02	0.0051	-0.06	0.04	0.15	-0.05	0.03	0.087	-0.05	0.01	0.00065	-0.01	0.02	0.56	-0.05	0.02	0.0012	-0.04	0.01	0.017	-0.06	0.03	0.019	1e-05	1.4e-05	-0.09	1.07	0.93	-0.31	0.52	0.55	-2.23	1.77	0.21
Lipid	Phosphatidylinositol (PI)	1-palmitoyl-2-oleoyl-GPI (16:0/18:1)*	52669			HMDB09783	LC/MS Pos Late	3140	854.575	0.7137	2	0	0.02	0.98	-0.02	0.01	0.085	-0.05	0.03	0.041	-0.02	0.02	0.36	-0.02	0.01	0.0049	-0.03	0.02	0.089	-0.02	0.01	0.049	-0.02	0.01	0.093	-0.03	0.01	0.041	2.7e-06	2.5e-05	0.55	0.74	0.46	-0.49	0.34	0.15	-1.56	1.08	0.15
Lipid	Phosphatidylinositol (PI)	1-stearoyl-2-arachidonoyl-GPI (18:0/20:4)	52449			HMDB09815	LC/MS Pos Late	3000	904.591	0	1	-0.04	0.04	0.29	-0.07	0.03	0.061	-0.02	0.06	0.71	0.01	0.05	0.87	-0.04	0.02	0.1	-0.02	0.04	0.5	-0.04	0.03	0.21	-0.06	0.03	0.02	-0.01	0.04	0.88	1.4e-06	7.8e-09	-1.41	1.54	0.36	-2.04	0.99	0.041	1.59	2.67	0.55
Lipid	Phosphatidylinositol (PI)	1-stearoyl-2-linoleoyl-GPI (18:0/18:2)	52468			HMDB09809	LC/MS Polar	910	861.55	0	1	0.01	0.04	0.79	-0.05	0.03	0.061	0	0.05	0.97	-0.06	0.04	0.14	-0.04	0.02	0.019	0	0.03	0.87	-0.06	0.02	0.015	-0.04	0.02	0.1	-0.05	0.03	0.14	7e-06	9.1e-07	-0.6	1.39	0.67	-0.68	0.78	0.38	-1.35	2.08	0.52
Lipid	Phosphatidylinositol (PI)	1-stearoyl-2-oleoyl-GPI (18:0/18:1)*	52726				LC/MS Pos Late	3711	882.607	2.617	2	0	0.02	0.79	-0.01	0.01	0.32	0	0.02	1	0	0.02	0.82	-0.01	0.01	0.32	0	0.01	0.99	-0.01	0.01	0.34	-0.01	0.01	0.42	-0.01	0.01	0.73	7.4e-05	3.8e-06	0.16	0.59	0.79	-0.75	0.36	0.037	-0.9	0.97	0.36
Lipid	Phosphatidylserine (PS)	1-stearoyl-2-oleoyl-GPS (18:0/18:1)	19265	9547087		HMDB10163	LC/MS Pos Late	3000	790.559	16.1776	1	0	0.02	1	0.02	0.01	0.22	0.03	0.03	0.31	0.03	0.02	0.13	0.02	0.01	0.046	0.01	0.02	0.51	0.02	0.01	0.049	0.01	0.01	0.28	0.03	0.02	0.063	1.5e-05	3.7e-07	0.43	0.79	0.59	-0.17	0.41	0.67	-0.49	1.11	0.66
Lipid	Phospholipid Metabolism	Choline	15506	305	C00114	HMDB00097	LC/MS Pos Early	1961	104.107	0	1	0.02	0.06	0.73	-0.07	0.06	0.28	-0.04	0.08	0.59	-0.01	0.07	0.84	-0.03	0.03	0.37	-0.01	0.05	0.84	-0.04	0.05	0.44	-0.03	0.04	0.46	-0.03	0.05	0.51	3.1e-06	9.9e-09	-2.24	2.45	0.36	1.08	1.72	0.53	0.3	3.26	0.93
Lipid	Phospholipid Metabolism	Choline phosphate	34396	1014	C00588	HMDB01565	LC/MS Pos Early	700	184.073	0.1586	1	0.06	0.03	0.047	0.08	0.02	0.0002	-0.02	0.04	0.53	-0.02	0.03	0.58	0.03	0.01	0.0089	0.03	0.02	0.19	0.04	0.02	0.024	0.07	0.02	3.6e-05	-0.02	0.02	0.48	2.4e-07	0.0001	1.43	1.16	0.22	0.21	0.58	0.72	0.38	1.48	0.8
Lipid	Phospholipid Metabolism	Glycerophosphoethanolamine	37455	123874	C01233	HMDB00114	LC/MS Pos Early	659	216.063	0	1	0	0.03	0.98	0.04	0.04	0.21	0.09	0.06	0.13	0.07	0.04	0.049	0.05	0.02	0.015	0.03	0.03	0.27	0.06	0.02	0.02	0.02	0.02	0.4	0.07	0.03	0.02	1e-07	1.7e-08	-0.69	1.24	0.58	0.46	1	0.65	4.51	2.66	0.093
Lipid	Phospholipid Metabolism	Glycerophosphoinositol*	52307	167572			LC/MS Neg	630	333.059	1.4274	2	0	0	0.92	0	0	0.58	0.01	0.02	0.53	0.01	0.02	0.5	0	0	0.65	0	0	0.91	0	0	0.55	0	0	0.69	0.01	0.01	0.4	0.017	1.3e-05	0.02	0.13	0.91	0	0.07	0.94	0.21	0.78	0.79
Lipid	Phospholipid Metabolism	Glycerophosphorylcholine (GPC)	15990	71920	C00670	HMDB00086	LC/MS Pos Early	672	258.11	0	1	-0.01	0.02	0.56	0	0.02	0.81	0.02	0.06	0.76	0.02	0.01	0.14	0.01	0.01	0.23	-0.01	0.02	0.79	0.01	0.01	0.14	0	0.01	0.85	0.02	0.01	0.14	1.6e-06	1.4e-07	-0.66	0.72	0.36	-0.16	0.46	0.73	2.24	2.33	0.34
Lipid	Phospholipid Metabolism	Glycerophosphoserine*	57404	3081457			LC/MS Pos Early	577	260.053	7.2958	2	-0.03	0.03	0.34	-0.01	0.03	0.7	0.02	0.05	0.77	-0.02	0.03	0.55	-0.02	0.02	0.24	-0.02	0.03	0.44	-0.02	0.02	0.45	-0.02	0.02	0.32	-0.01	0.03	0.66	5e-06	1.7e-08	-1.65	1.17	0.16	-0.56	0.84	0.51	-0.83	2.21	0.71
Lipid	Phospholipid Metabolism	Phosphoethanolamine	1600	1015	C00346	HMDB00224	LC/MS Pos Early	700	142.026	0.8723	1	0.05	0.03	0.082	0.06	0.02	0.0081	-0.03	0.04	0.5	-0.01	0.03	0.84	0.03	0.01	0.057	0.02	0.02	0.37	0.03	0.02	0.079	0.06	0.02	0.0021	-0.01	0.03	0.6	6.7e-07	8.4e-06	1.32	1.09	0.22	-0.21	0.7	0.76	1	1.69	0.55
Lipid	Phospholipid Metabolism	Trimethylamine N-oxide	40406	1145	C01104	HMDB00925	LC/MS Pos Early	2100	76.0757	0	1	-0.02	0.02	0.23	-0.02	0.01	0.21	0	0.02	0.99	-0.02	0.02	0.18	-0.01	0.01	0.12	0	0.01	0.72	-0.02	0.01	0.088	-0.02	0.01	0.076	-0.01	0.01	0.4	0.00055	3.6e-07	-0.76	0.53	0.15	0.14	0.34	0.67	0.37	0.8	0.64
Lipid	Plasmalogen	1-(1-enyl-palmitoyl)-2-arachidonoyl-GPC (P-16:0/20:4)*	52689			HMDB11220	LC/MS Pos Late	2154	766.575	0	2	-0.03	0.04	0.46	0.08	0.04	0.036	0.11	0.06	0.068	0.14	0.05	0.0099	0.06	0.02	0.0036	0.03	0.03	0.41	0.09	0.03	0.0021	0.03	0.03	0.28	0.13	0.04	0.0011	3.2e-09	3.1e-08	0.96	1.41	0.5	1.86	1.07	0.082	6.78	2.46	0.0066
Lipid	Plasmalogen	1-(1-enyl-palmitoyl)-2-arachidonoyl-GPE (P-16:0/20:4)*	52673			HMDB11352	LC/MS Pos Late	2270	724.528	0	2	0.02	0.03	0.5	0.11	0.03	0.00024	0.07	0.04	0.06	0.1	0.04	0.009	0.07	0.02	5.7e-06	0.04	0.02	0.034	0.1	0.02	2e-05	0.06	0.02	0.0022	0.09	0.03	0.00098	8.7e-11	3e-06	0.84	1	0.4	2.53	0.83	0.0025	3.47	1.44	0.017
Lipid	Plasmalogen	1-(1-enyl-palmitoyl)-2-linoleoyl-GPC (P-16:0/18:2)*	52682			HMDB11211	LC/MS Pos Late	2226	742.575	0	2	-0.01	0.04	0.82	0.16	0.03	1.7e-06	0.04	0.05	0.46	0.18	0.05	0.00021	0.11	0.02	4e-07	0.01	0.03	0.77	0.16	0.03	3.7e-09	0.1	0.03	9.2e-05	0.12	0.04	0.00048	1.8e-12	1.2e-07	1.32	1.55	0.4	2.3	0.93	0.014	-0.57	2.2	0.8
Lipid	Plasmalogen	1-(1-enyl-palmitoyl)-2-linoleoyl-GPE (P-16:0/18:2)*	52677			HMDB11343	LC/MS Pos Late	2351	700.528	0	2	0.01	0.02	0.55	0.07	0.02	0.00064	0.02	0.02	0.5	0.05	0.03	0.06	0.04	0.01	0.00063	0.02	0.02	0.31	0.06	0.02	0.00028	0.05	0.02	0.0017	0.03	0.02	0.058	8.2e-09	1.2e-05	0.8	0.95	0.4	1.2	0.61	0.051	-0.45	0.98	0.65
Lipid	Plasmalogen	1-(1-enyl-palmitoyl)-2-oleoyl-GPC (P-16:0/18:1)*	52478				LC/MS Pos Late	2443	744.59	0	2	-0.02	0.04	0.68	0.09	0.03	0.0018	-0.04	0.07	0.56	0.04	0.05	0.38	0.04	0.02	0.042	-0.03	0.03	0.39	0.07	0.03	0.006	0.06	0.02	0.013	0.02	0.04	0.61	4.9e-09	1.6e-07	-0.24	1.44	0.87	0.31	0.84	0.72	-4.58	2.94	0.12
Lipid	Plasmalogen	1-(1-enyl-palmitoyl)-2-oleoyl-GPE (P-16:0/18:1)*	52477			HMDB11342	LC/MS Pos Late	2600	702.543	0.2379	2	-0.01	0.02	0.64	0.04	0.02	0.076	0	0.02	1	0.04	0.03	0.16	0.02	0.01	0.18	0	0.01	0.83	0.04	0.02	0.033	0.02	0.02	0.26	0.02	0.02	0.37	6.7e-08	1.6e-06	0.79	0.93	0.4	0.47	0.64	0.47	-0.84	0.86	0.33
Lipid	Plasmalogen	1-(1-enyl-palmitoyl)-2-palmitoleoyl-GPC (P-16:0/16:1)*	52713			HMDB11207	LC/MS Pos Late	2218	716.559	0	2	-0.01	0.03	0.77	0	0.03	0.92	-0.09	0.06	0.14	-0.02	0.04	0.56	-0.02	0.02	0.19	-0.05	0.03	0.13	-0.02	0.02	0.5	0	0.02	0.89	-0.04	0.03	0.17	8.5e-07	2.7e-06	-0.29	1.33	0.83	-0.67	0.76	0.38	-3.27	2.29	0.16
Lipid	Plasmalogen	1-(1-enyl-palmitoyl)-2-palmitoyl-GPC (P-16:0/16:0)*	52716	11146967		HMDB11206	LC/MS Pos Late	2454	718.575	0	2	0.05	0.05	0.3	0.08	0.04	0.065	-0.06	0.07	0.45	0.02	0.05	0.7	0.03	0.03	0.2	0	0.04	0.96	0.05	0.03	0.15	0.07	0.03	0.029	0	0.04	0.96	1.7e-07	3.2e-07	1.25	1.86	0.5	1.02	1.19	0.39	-3.79	2.98	0.2
Lipid	Plasmalogen	1-(1-enyl-stearoyl)-2-arachidonoyl-GPE (P-18:0/20:4)*	52475	9547058		HMDB05779	LC/MS Pos Late	2511	752.559	0	2	0.01	0.03	0.64	0.1	0.03	0.00091	0.07	0.04	0.12	0.13	0.04	0.004	0.08	0.02	2.5e-05	0.04	0.02	0.08	0.11	0.03	3.1e-05	0.06	0.02	0.0056	0.1	0.03	0.0014	1e-10	4e-07	0.72	1.17	0.54	1.84	0.87	0.036	4.86	1.72	0.0055
Lipid	Plasmalogen	1-(1-enyl-stearoyl)-2-linoleoyl-GPE (P-18:0/18:2)*	52748			HMDB11376	LC/MS Pos Late	2633	728.559	0	2	0	0.03	0.94	0.09	0.02	0.00044	0.03	0.03	0.45	0.07	0.03	0.038	0.05	0.01	0.00049	0.01	0.02	0.56	0.08	0.02	0.00012	0.06	0.02	0.0028	0.05	0.02	0.038	1.6e-08	1.9e-06	0.4	1.26	0.75	1.24	0.69	0.074	-0.46	1.42	0.75
Lipid	Plasmalogen	1-(1-enyl-stearoyl)-2-oleoyl-GPE (P-18:0/18:1)	52614			HMDB11375	LC/MS Pos Late	2950	730.575	0	1	0.01	0.03	0.8	0.04	0.02	0.084	0	0.03	0.98	0.04	0.03	0.18	0.02	0.01	0.14	0	0.02	0.96	0.04	0.02	0.042	0.03	0.02	0.11	0.02	0.02	0.44	7.6e-08	2.7e-06	0.83	1.14	0.47	0.25	0.66	0.71	-0.36	1.05	0.73
Lipid	Polyunsaturated Fatty Acid (n3 and n6)	Adrenate (22:4n6)	32980	5497181	C16527	HMDB02226	LC/MS Neg	5678	331.264	0	1	0.01	0.02	0.58	-0.01	0.01	0.53	-0.05	0.02	0.031	-0.01	0.02	0.54	-0.02	0.01	0.057	-0.02	0.01	0.1	-0.01	0.01	0.3	0	0.01	0.73	-0.03	0.01	0.051	1.1e-05	4.5e-05	0.25	0.65	0.7	-0.12	0.4	0.77	0.57	0.91	0.53
Lipid	Polyunsaturated Fatty Acid (n3 and n6)	Arachidonate (20:4n6)	1110	444899	C00219	HMDB01043	LC/MS Neg	5535	303.233	0	1	0.01	0.03	0.81	0.06	0.03	0.052	0	0.05	0.93	0.06	0.04	0.17	0.04	0.02	0.044	0.01	0.03	0.79	0.05	0.02	0.026	0.03	0.02	0.11	0.04	0.03	0.21	9.8e-08	3.2e-08	0.28	1.31	0.83	0.66	0.8	0.41	1.88	2.03	0.36
Lipid	Polyunsaturated Fatty Acid (n3 and n6)	Dihomo-linoleate (20:2n6)	17805	6439848	C16525	HMDB05060	LC/MS Neg	5730	307.264	0	1	0.02	0.02	0.4	0.02	0.02	0.23	-0.06	0.03	0.036	-0.02	0.03	0.45	-0.01	0.01	0.62	-0.02	0.02	0.25	0	0.02	0.77	0.02	0.01	0.18	-0.04	0.02	0.06	1.6e-06	4.7e-05	-0.16	0.83	0.85	0.25	0.52	0.63	-0.08	1.15	0.94
Lipid	Polyunsaturated Fatty Acid (n3 and n6)	Dihomo-linolenate (20:3n3 or n6)	35718	5280581	C03242	HMDB02925	LC/MS Neg	5596	305.249	0	1	0.03	0.03	0.22	0.02	0.02	0.36	-0.05	0.05	0.3	0.04	0.03	0.29	0.02	0.01	0.23	0	0.03	0.92	0.02	0.02	0.2	0.02	0.02	0.17	0.01	0.03	0.63	7e-06	7.7e-08	0.77	1.11	0.49	0.29	0.57	0.61	1.29	2.19	0.56
Lipid	Polyunsaturated Fatty Acid (n3 and n6)	Docosadienoate (22:2n6)	32415	5282807	C16533	HMDB61714	LC/MS Neg	6034	335.296	0	1	0	0.02	0.89	0.02	0.02	0.42	-0.05	0.02	0.029	-0.03	0.03	0.29	-0.02	0.01	0.063	-0.04	0.02	0.024	-0.01	0.02	0.73	0.01	0.02	0.67	-0.04	0.02	0.016	6e-07	2.5e-05	-0.94	0.87	0.28	0.03	0.58	0.95	0.09	1.01	0.93
Lipid	Polyunsaturated Fatty Acid (n3 and n6)	Docosahexaenoate (DHA; 22:6n3)	44675	445580	C06429	HMDB02183	LC/MS Neg	5525	327.233	0	1	0.05	0.03	0.04	0.05	0.02	0.0013	0.02	0.04	0.68	0.01	0.02	0.78	0.04	0.01	0.0016	0.04	0.02	0.065	0.03	0.01	0.014	0.05	0.01	0.00016	0.01	0.02	0.57	6.8e-06	3.9e-06	2.48	1.03	0.017	0.69	0.46	0.13	1.46	1.76	0.41
Lipid	Polyunsaturated Fatty Acid (n3 and n6)	Docosapentaenoate (n3 DPA; 22:5n3)	32504	6441454	C16513	HMDB06528	LC/MS Neg	5571	329.249	0	1	0	0.02	0.84	0.03	0.02	0.085	-0.04	0.03	0.21	0	0.02	0.89	0.01	0.01	0.63	-0.02	0.02	0.3	0.02	0.01	0.23	0.02	0.01	0.13	-0.01	0.02	0.55	7.8e-07	6.4e-06	0.81	0.9	0.37	0.54	0.46	0.24	1.08	1.33	0.42
Lipid	Polyunsaturated Fatty Acid (n3 and n6)	Docosapentaenoate (n6 DPA; 22:5n6)	37478	6441454	C16513	HMDB01976	LC/MS Neg	5624.5	329.249	0	1	0	0.02	0.98	0	0.02	0.85	-0.06	0.03	0.077	0	0.02	0.82	-0.01	0.01	0.36	-0.03	0.02	0.14	0	0.01	0.89	0	0.01	0.78	-0.01	0.02	0.44	8.8e-07	4.3e-06	0.37	0.9	0.68	-0.17	0.51	0.74	-0.38	1.5	0.8
Lipid	Polyunsaturated Fatty Acid (n3 and n6)	Docosatrienoate (22:3n3)	32417	5312556	C16534	HMDB02823	LC/MS Neg	5823	333.28	5.0753	1	0.01	0.02	0.61	0	0.01	0.9	-0.05	0.02	0.019	0	0.02	0.84	-0.01	0.01	0.18	-0.02	0.01	0.074	0	0.01	0.76	0	0.01	0.99	-0.02	0.01	0.081	1.4e-06	9.9e-05	-0.55	0.66	0.41	-0.14	0.31	0.66	-0.13	0.87	0.88
Lipid	Polyunsaturated Fatty Acid (n3 and n6)	Docosatrienoate (22:3n6)*	57467				LC/MS Neg	5850	333.28	35.2895	2	0.01	0.01	0.66	-0.02	0.01	0.13	-0.04	0.02	0.031	0	0.01	0.89	-0.01	0.01	0.092	-0.01	0.01	0.15	-0.01	0.01	0.3	-0.01	0.01	0.35	-0.01	0.01	0.28	0.00047	0.00039	0.43	0.49	0.38	-0.22	0.37	0.55	-0.62	0.68	0.36
Lipid	Polyunsaturated Fatty Acid (n3 and n6)	Eicosapentaenoate (EPA; 20:5n3)	18467	446284	C06428	HMDB01999	LC/MS Neg	5450	301.217	0	1	0.03	0.02	0.27	0.02	0.01	0.032	0.02	0.04	0.52	-0.01	0.02	0.71	0.01	0.01	0.11	0.02	0.02	0.28	0.01	0.01	0.21	0.02	0.01	0.019	0	0.01	0.97	8.3e-05	4.6e-05	1.19	0.93	0.2	0.39	0.31	0.21	0.91	1.49	0.54
Lipid	Polyunsaturated Fatty Acid (n3 and n6)	Hexadecadienoate (16:2n6)	57652			HMDB00477	LC/MS Neg	5398	251.202	0	1	0.01	0.02	0.63	0	0.01	0.76	-0.03	0.04	0.4	-0.04	0.03	0.15	-0.01	0.01	0.27	0	0.02	0.81	-0.01	0.01	0.25	0	0.01	0.86	-0.03	0.02	0.13	9.4e-05	1.9e-05	0.46	0.8	0.56	0.15	0.39	0.71	0.54	1.5	0.72
Lipid	Polyunsaturated Fatty Acid (n3 and n6)	Linoleate (18:2n6)	1105	5280450	C01595	HMDB00673	LC/MS Neg	5535	279.233	0	1	0.02	0.03	0.44	0.03	0.02	0.15	-0.06	0.04	0.14	-0.01	0.04	0.78	0.01	0.01	0.62	-0.01	0.02	0.65	0.02	0.02	0.39	0.03	0.02	0.11	-0.03	0.03	0.3	3.7e-06	1.9e-06	0.43	1.06	0.69	0.67	0.59	0.26	1.1	1.69	0.52
Lipid	Polyunsaturated Fatty Acid (n3 and n6)	Linolenate [alpha or gamma; (18:3n3 or 6)]	34035	5280934	C06426	HMDB03073	LC/MS Neg	5450	277.217	0	1	0.01	0.02	0.57	0.02	0.02	0.14	-0.03	0.03	0.28	-0.02	0.03	0.52	0	0.01	0.76	-0.01	0.02	0.54	0.01	0.01	0.49	0.02	0.01	0.13	-0.03	0.02	0.23	5.5e-06	1.4e-05	0.62	0.84	0.46	0.61	0.45	0.18	0.42	1.36	0.76
Lipid	Polyunsaturated Fatty Acid (n3 and n6)	Nisinate (24:6n3)	57810	11792612		HMDB02007	LC/MS Neg	5657	355.264	35.4481	1	0.01	0.01	0.22	0	0.01	0.9	-0.02	0.02	0.17	-0.01	0.01	0.51	0	0.01	0.43	0	0.01	0.63	0	0.01	0.58	0	0.01	0.74	-0.01	0.01	0.15	0.0011	0.029	0.57	0.45	0.21	0.25	0.21	0.24	-0.65	0.65	0.32
Lipid	Polyunsaturated Fatty Acid (n3 and n6)	Stearidonate (18:4n3)	33969	5312508	C16300	HMDB06547	LC/MS Neg	5395	275.202	4.5202	1	0.01	0.02	0.79	0	0.01	0.64	-0.04	0.03	0.11	-0.01	0.02	0.55	0	0.01	0.62	-0.02	0.02	0.24	0	0.01	0.94	0	0.01	0.65	-0.02	0.01	0.24	9.6e-06	0.00012	1.09	0.72	0.13	-0.16	0.28	0.56	0.25	1.11	0.82
Lipid	Polyunsaturated Fatty Acid (n3 and n6)	Tetradecadienoate (14:2)*	46618				LC/MS Neg	5315	223.171	0.1586	2	0.01	0.01	0.62	0.01	0.01	0.45	-0.05	0.03	0.11	-0.03	0.02	0.14	-0.01	0.01	0.36	-0.01	0.01	0.5	-0.01	0.01	0.52	0.01	0.01	0.41	-0.03	0.02	0.039	4.5e-05	0.00068	-0.13	0.55	0.81	0.56	0.38	0.15	-0.69	1.23	0.57
Lipid	Pregnenolone Steroids	17alpha-hydroxypregnanolone glucuronide	47403				LC/MS Neg	5071.9	509.276	40.8406	1	-0.01	0.01	0.35	0.02	0.01	0.011	0	0.02	0.99	-0.03	0.01	0.0046	-0.01	0.01	0.33	-0.01	0.01	0.32	0	0.01	0.55	0.01	0.01	0.12	-0.02	0.01	0.017	0.001	0.32	-0.25	0.46	0.6	0.43	0.27	0.11	0.03	0.73	0.97
Lipid	Pregnenolone Steroids	17alpha-hydroxypregnenolone 3-sulfate	37482	152971		HMDB00416	LC/MS Neg	4800	411.185	25.9318	1	0	0.01	0.71	0.01	0.01	0.48	0	0.01	0.73	-0.03	0.01	0.04	-0.01	0.01	0.26	0	0.01	0.85	-0.01	0.01	0.2	0	0.01	0.75	-0.01	0.01	0.16	0.0068	0.0076	-0.84	0.48	0.08	0.21	0.33	0.52	-0.11	0.56	0.85
Lipid	Pregnenolone Steroids	21-hydroxypregnenolone disulfate	46115	134595			LC/MS Neg	3935	245.067	0.1586	1	0	0.02	0.95	0.02	0.01	0.15	0	0.02	0.89	-0.03	0.02	0.16	0	0.01	0.85	0	0.02	0.91	0	0.01	0.91	0.01	0.01	0.21	-0.02	0.01	0.26	3.4e-05	0.00019	-2.12	0.83	0.012	0.69	0.39	0.078	0.37	0.96	0.7
Lipid	Pregnenolone Steroids	21-hydroxypregnenolone monosulfate (1)	37174	174681			LC/MS Neg	4624	411.185	53.1324	1	0.02	0.02	0.17	0.04	0.01	0.00046	-0.02	0.02	0.36	-0.02	0.02	0.33	0.02	0.01	0.038	0.01	0.01	0.41	0.02	0.01	0.093	0.03	0.01	0.00017	-0.01	0.01	0.41	1.7e-05	0.00064	-0.77	0.6	0.2	0.75	0.33	0.024	0.53	0.92	0.56
Lipid	Pregnenolone Steroids	21-hydroxypregnenolone monosulfate (2)	37175	10670474			LC/MS Neg	4711	411.185	78.747	1	0.01	0.03	0.72	0	0.02	0.88	-0.02	0.02	0.47	-0.01	0.02	0.64	-0.01	0.01	0.3	-0.01	0.02	0.42	-0.01	0.01	0.48	0	0.02	0.95	-0.01	0.01	0.41	9.4e-06	1.1e-06	-1.06	1.11	0.34	0.55	0.65	0.4	0.04	0.95	0.96
Lipid	Pregnenolone Steroids	Pregnenetriol disulfate*	46599				LC/MS Neg	3515	246.074	0	2	0	0.02	0.8	0	0.01	0.68	-0.01	0.02	0.72	-0.03	0.01	0.006	-0.02	0.01	0.003	-0.01	0.01	0.35	-0.02	0.01	0.0064	0	0.01	0.61	-0.03	0.01	0.0069	0.00037	0.00013	-1.48	0.67	0.028	0.29	0.32	0.37	0.43	0.66	0.51
Lipid	Pregnenolone Steroids	Pregnenetriol sulfate*	57715				LC/MS Neg	4746	413.2	0	2	0.01	0.02	0.82	0.04	0.02	0.038	0.04	0.03	0.17	-0.02	0.02	0.27	0.01	0.01	0.3	0.03	0.02	0.17	0.01	0.01	0.68	0.03	0.01	0.058	0	0.02	0.96	0.00012	0.00035	-1.26	0.93	0.18	1.03	0.49	0.036	1.25	1.05	0.24
Lipid	Pregnenolone Steroids	Pregnenolone sulfate	38170	105074		HMDB00774	LC/MS Neg	5100	395.19	0.9516	1	0.01	0.02	0.64	0.01	0.01	0.2	0	0.01	0.94	-0.02	0.01	0.24	0	0.01	0.98	0	0.01	0.98	0	0.01	0.97	0.01	0.01	0.16	-0.01	0.01	0.35	0.00014	0.003	-0.85	0.58	0.14	0.31	0.32	0.34	-0.16	0.6	0.79
Lipid	Primary Bile Acid Metabolism	Chenodeoxycholate	1563	10133	C02528	HMDB00518	LC/MS Neg	5264	391.285	31.9588	1	0	0.01	0.98	-0.02	0.01	0.094	0.01	0.02	0.74	0.01	0.01	0.48	0	0.01	0.77	0	0.01	0.99	0	0.01	0.82	-0.01	0.01	0.15	0.01	0.01	0.46	0.0033	2.4e-06	-0.1	0.42	0.82	-0.08	0.22	0.73	-0.51	0.72	0.48
Lipid	Primary Bile Acid Metabolism	Cholate	22842	221493	C00695	HMDB00619	LC/MS Neg	5165	407.28	4.9167	1	0	0	0.39	0	0	0.46	0	0	0.39	0	0	0.25	0	0	0.71	0	0	0.95	0	0	0.55	0	0	0.94	0	0	0.48	0.021	0.0078	0	0.05	0.97	0	0.04	0.96	-0.05	0.1	0.64
Lipid	Primary Bile Acid Metabolism	Cholic acid glucuronide	48772				LC/MS Neg	4539	583.313	46.0745	1	-0.01	0.01	0.47	0	0.01	0.89	-0.01	0.01	0.39	0.01	0.01	0.16	0	0	0.9	-0.01	0.01	0.18	0.01	0	0.28	0	0	0.78	0	0.01	0.59	0.00016	0.00066	-0.2	0.23	0.4	0.12	0.16	0.46	-0.12	0.36	0.74
Lipid	Primary Bile Acid Metabolism	Glyco-alpha-muricholate**	48018				LC/MS Neg	4722	464.302	38.5408	3	-0.01	0.01	0.31	-0.02	0.01	0.014	0	0.01	0.93	0	0	0.39	-0.01	0	0.018	-0.01	0.01	0.22	-0.01	0	0.059	-0.02	0.01	0.007	0	0	0.33	0.0041	8.6e-05	-0.03	0.36	0.94	-0.44	0.19	0.022	-0.42	0.31	0.17
Lipid	Primary Bile Acid Metabolism	Glyco-beta-muricholate**	46742				LC/MS Neg	4772	464.302	14.2744	3	0	0	0.39	0	0	0.097	0	0	0.65	0	0	0.14	0	0	0.023	0	0	0.6	0	0	0.027	0	0	0.049	0	0	0.23	0.12	0.013	0.03	0.16	0.85	-0.11	0.07	0.098	-0.03	0.18	0.85
Lipid	Primary Bile Acid Metabolism	Glycochenodeoxycholate	32346	12544	C05466	HMDB00637	LC/MS Neg	5236.1	448.307	0	1	-0.01	0.01	0.11	-0.02	0.01	0.00053	0	0.01	0.43	0	0	0.27	0	0	0.016	0	0	0.54	0	0	0.024	-0.02	0	0.00019	0	0	0.36	0.032	6.7e-08	-0.25	0.23	0.29	-0.12	0.11	0.31	-0.15	0.09	0.12
Lipid	Primary Bile Acid Metabolism	Glycochenodeoxycholate glucuronide (1)	52983				LC/MS Neg	4806	311.666	0.0793	1	0	0.01	0.6	-0.01	0.01	0.02	-0.03	0.01	0.0092	-0.01	0.01	0.036	-0.01	0	7.7e-05	-0.01	0.01	0.018	-0.01	0	0.0016	-0.01	0	0.032	-0.02	0.01	0.0013	0.0056	0.0082	-0.08	0.22	0.73	-0.16	0.16	0.32	-1.2	0.43	0.0058
Lipid	Primary Bile Acid Metabolism	Glycochenodeoxycholate sulfate	52974				LC/MS Neg	4820	263.628	0.5551	1	0	0	0.049	-0.01	0.01	0.03	-0.01	0	0.011	-0.01	0	0.029	-0.01	0	5.5e-07	-0.01	0	6.8e-05	-0.01	0	0.0016	-0.01	0	0.014	-0.01	0	0.00022	0.2	0.077	-0.07	0.09	0.47	-0.1	0.12	0.38	-0.22	0.09	0.013
Lipid	Primary Bile Acid Metabolism	Glycocholate	18476	10140	C01921	HMDB00138	LC/MS Neg	5163	464.302	0.0793	1	0	0	0.38	-0.01	0	0.019	0	0	0.45	0	0	0.4	0	0	0.014	0	0	0.12	0	0	0.065	-0.01	0	0.01	0	0	0.23	0.016	0.00022	-0.15	0.15	0.3	-0.1	0.07	0.19	-0.14	0.1	0.15
Lipid	Primary Bile Acid Metabolism	Glycocholate glucuronide (1)	52977				LC/MS Neg	4533	640.334	53.6082	1	0	0.01	0.92	-0.01	0.01	0.24	-0.06	0.02	0.016	0	0.02	0.9	-0.01	0.01	0.15	-0.02	0.01	0.086	-0.01	0.01	0.48	-0.01	0.01	0.31	-0.02	0.01	0.24	1e-06	3.2e-06	-0.68	0.56	0.22	-0.29	0.32	0.37	-1.21	0.97	0.21
Lipid	Primary Bile Acid Metabolism	Glycocholate sulfate	52967				LC/MS Neg	4560	271.626	96.8279	1	.	.	.	.	.	.	.	.	.	.	.	.	.	.	.	.	.	.	.	.	.	.	.	.	.	.	.	.	.	.	.	.	.	.	.	.	.	.
Lipid	Primary Bile Acid Metabolism	Tauro-beta-muricholate	33983	168408		HMDB00932	LC/MS Neg	4774	514.284	45.4401	1	0	0	0.16	0	0	0.42	0	0.01	0.91	0	0	0.12	0	0	0.15	0	0	0.41	0	0	0.054	0	0	0.94	0	0	0.14	0.92	0.72	0.09	0.1	0.38	-0.06	0.05	0.28	0.03	0.22	0.9
Lipid	Primary Bile Acid Metabolism	Taurochenodeoxycholate	18494	387316	C05465	HMDB00951	LC/MS Neg	5250	498.289	1.4274	1	0	0	0.65	0	0	0.25	0	0	0.23	0	0	0.26	0	0	0.066	0	0	0.19	0	0	0.12	0	0	0.33	0	0	0.17	0.0091	0.082	0.06	0.13	0.65	-0.02	0.02	0.43	-0.03	0.02	0.065
Lipid	Primary Bile Acid Metabolism	Taurocholate	18497	6675	C05122	HMDB00036	LC/MS Neg	5150	514.284	11.816	1	0	0	0.58	0	0	0.49	0	0	0.045	0	0	0.41	0	0	0.11	0	0	0.076	0	0	0.26	0	0	0.63	0	0	0.19	0.012	0.41	0.02	0.06	0.71	-0.01	0.02	0.38	-0.04	0.02	0.048
Lipid	Progestin Steroids	5alpha-pregnan-3(alpha or beta),20beta-diol disulfate	46172	5127902			LC/MS Neg	4310	239.085	45.5987	1	0	0	0.99	0	0	0.94	-0.01	0.01	0.7	-0.04	0.02	0.052	0	0	0.89	0	0	0.77	0	0	0.88	0	0	0.93	-0.02	0.01	0.13	0.067	0.25	-0.08	0.09	0.39	0.01	0.01	0.67	-0.41	0.61	0.51
Lipid	Progestin Steroids	5alpha-pregnan-3alpha,20beta-diol disulfate 1	37201				LC/MS Neg	4565	239.085	97.8588	1	.	.	.	.	.	.	.	.	.	.	.	.	.	.	.	.	.	.	.	.	.	.	.	.	.	.	.	.	.	.	.	.	.	.	.	.	.	.
Lipid	Progestin Steroids	5alpha-pregnan-3beta,20alpha-diol disulfate	37198				LC/MS Neg	3962	239.085	0.4758	1	0	0	0.67	0	0	0.87	-0.01	0.01	0.61	-0.03	0.01	0.02	0	0	0.81	0	0	0.56	0	0	0.8	0	0	0.82	-0.02	0.01	0.035	0.027	0.07	-0.01	0.06	0.84	0	0.01	0.83	-0.32	0.6	0.59
Lipid	Progestin Steroids	5alpha-pregnan-3beta,20alpha-diol monosulfate (1)	37199				LC/MS Neg	4928	399.221	90.7216	1	.	.	.	.	.	.	.	.	.	.	.	.	.	.	.	.	.	.	.	.	.	.	.	.	.	.	.	.	.	.	.	.	.	.	.	.	.	.
Lipid	Progestin Steroids	5alpha-pregnan-3beta,20alpha-diol monosulfate (2)	37200				LC/MS Neg	5060	399.221	1.586	1	0	0	0.95	0	0	0.78	-0.01	0.02	0.56	0	0.01	0.83	0	0	0.7	0	0	1	0	0	0.8	0	0	0.75	0	0.01	0.85	0.072	0.00016	-0.01	0.07	0.83	0	0.01	0.61	-0.55	0.81	0.5
Lipid	Progestin Steroids	5alpha-pregnan-3beta,20beta-diol monosulfate (1)	37196				LC/MS Neg	5180	399.221	2.0619	1	0	0	0.97	0	0	0.91	0	0.02	0.83	0.01	0.02	0.6	0	0	0.85	0	0	0.93	0	0	0.93	0	0	0.91	0.01	0.01	0.55	0.063	1.1e-05	-0.02	0.07	0.74	0.01	0.01	0.5	-1.82	0.95	0.058
Lipid	Progestin Steroids	5alpha-pregnan-3beta-ol,20-one sulfate	37480				LC/MS Neg	5136	397.205	60.8247	1	0.01	0.01	0.57	0.02	0.01	0.042	-0.05	0.02	0.047	-0.03	0.02	0.17	0	0.01	0.85	-0.01	0.01	0.37	0.01	0.01	0.45	0.02	0.01	0.047	-0.03	0.02	0.037	1.1e-06	0.00026	0.15	0.53	0.77	0.2	0.33	0.54	-1.07	0.99	0.28
Lipid	Progestin Steroids	Pregn steroid monosulfate C21H34O5S*	32619				LC/MS Neg	5000	397.205	0	2	0.03	0.02	0.27	0.04	0.01	0.0098	0.02	0.02	0.34	0	0.02	0.8	0.02	0.01	0.017	0.02	0.02	0.13	0.02	0.01	0.068	0.03	0.01	0.0052	0.01	0.01	0.36	6e-05	0.0023	-1.2	0.89	0.18	0.98	0.4	0.016	-0.4	0.85	0.64
Lipid	Progestin Steroids	Pregnanediol-3-glucuronide	40708	123796		HMDB10318	LC/MS Neg	5145	495.296	3.3307	1	0	0	0.77	0	0	0.51	-0.01	0.02	0.6	0.01	0.02	0.73	0	0	0.53	0	0	0.68	0	0	0.52	0	0	0.58	0	0.01	0.83	0.0069	8.6e-05	-0.09	0.1	0.33	0	0.02	0.81	-1.45	0.97	0.14
Lipid	Progestin Steroids	Pregnanolone/allopregnanolone sulfate	48394				LC/MS Neg	5160	397.205	38.3822	1	0	0	0.74	0	0	0.67	-0.01	0.03	0.78	-0.01	0.02	0.69	0	0	0.6	0	0	0.82	0	0	0.71	0	0	0.62	0	0.02	0.76	0.13	0.0015	0.01	0.09	0.93	0.01	0.01	0.67	-1.05	1.1	0.34
Lipid	Progestin Steroids	Pregnen-diol disulfate C21H34O8S2*	32562				LC/MS Neg	3868	238.077	0	2	0.01	0.02	0.44	0	0.01	0.98	0	0.01	0.89	-0.02	0.01	0.022	-0.01	0.01	0.034	0	0.01	0.76	-0.02	0.01	0.033	0	0.01	0.72	-0.02	0.01	0.026	0.0014	0.001	-1.3	0.7	0.064	0.29	0.33	0.38	-0.59	0.62	0.34
Lipid	Secondary Bile Acid Metabolism	12-dehydrocholate	44644	94235		HMDB00400	LC/MS Neg	4871	405.265	84.2189	1	.	.	.	.	.	.	.	.	.	.	.	.	.	.	.	.	.	.	.	.	.	.	.	.	.	.	.	.	.	.	.	.	.	.	.	.	.	.
Lipid	Secondary Bile Acid Metabolism	3b-hydroxy-5-cholenoic acid	43507	92997		HMDB00308	LC/MS Neg	5205	373.275	9.9128	1	-0.03	0.02	0.15	-0.01	0.01	0.56	0.03	0.03	0.42	0.01	0.02	0.66	0	0.01	0.89	0	0.02	0.82	0	0.01	0.83	-0.01	0.01	0.27	0.01	0.02	0.37	1.2e-05	2.2e-07	-0.21	0.73	0.77	-0.2	0.3	0.51	1.02	1.38	0.46
Lipid	Secondary Bile Acid Metabolism	3-dehydrocholate	43835	159655		HMDB00502	LC/MS Neg	5050	405.265	50.6741	1	.	.	.	.	.	.	.	.	.	.	.	.	.	.	.	.	.	.	.	.	.	.	.	.	.	.	.	.	.	.	.	.	.	.	.	.	.	.
Lipid	Secondary Bile Acid Metabolism	7-ketodeoxycholate	31904	188292		HMDB00391	LC/MS Neg	4821	405.265	75.0991	1	0.02	0.02	0.31	-0.03	0.01	0.015	-0.04	0.03	0.16	0.02	0.02	0.4	-0.01	0.01	0.18	-0.01	0.01	0.63	-0.01	0.01	0.3	-0.02	0.01	0.088	0	0.01	0.99	1.5e-05	2.3e-08	0.43	0.64	0.5	-0.35	0.38	0.35	-0.57	1.12	0.61
Lipid	Secondary Bile Acid Metabolism	Deoxycholate	1114	222528	C04483	HMDB00626	LC/MS Neg	5294	391.285	9.7542	1	0.01	0.01	0.38	0	0.01	0.81	0	0.02	0.91	-0.01	0.02	0.53	0	0.01	0.96	0.01	0.01	0.29	-0.01	0.01	0.48	0	0.01	0.75	-0.01	0.01	0.64	0.0011	3.9e-05	0.17	0.46	0.72	-0.31	0.39	0.43	-0.07	0.96	0.94
Lipid	Secondary Bile Acid Metabolism	Deoxycholic acid sulfate	52969				LC/MS Neg	4880	235.117	81.0468	1	.	.	.	.	.	.	.	.	.	.	.	.	.	.	.	.	.	.	.	.	.	.	.	.	.	.	.	.	.	.	.	.	.	.	.	.	.	.
Lipid	Secondary Bile Acid Metabolism	Glycocholenate sulfate*	32599				LC/MS Neg	4750	254.623	0	2	-0.01	0.02	0.5	-0.01	0.02	0.61	-0.02	0.02	0.48	-0.05	0.02	0.0034	-0.03	0.01	0.003	-0.01	0.01	0.29	-0.03	0.01	0.005	-0.01	0.01	0.45	-0.04	0.01	0.0028	0.00085	2.2e-05	0.04	0.71	0.96	0.17	0.48	0.72	-2.18	0.91	0.017
Lipid	Secondary Bile Acid Metabolism	Glycodeoxycholate	18477	3035026	C05464	HMDB00631	LC/MS Pos Late	1302	450.321	35.2102	1	-0.01	0.01	0.41	-0.02	0.01	0.002	0.01	0.01	0.49	0	0.01	0.63	-0.01	0	0.024	0	0.01	0.89	-0.01	0	0.013	-0.01	0	0.00099	0	0.01	0.94	0.12	4.5e-06	-0.1	0.26	0.7	-0.24	0.15	0.11	0.18	0.47	0.7
Lipid	Secondary Bile Acid Metabolism	Glycodeoxycholate sulfate	52975				LC/MS Neg	4875	263.628	3.3307	1	-0.01	0.01	0.33	-0.01	0.01	0.1	-0.01	0.01	0.16	-0.02	0.01	0.0051	-0.01	0	4.1e-05	-0.01	0.01	0.028	-0.02	0	0.00048	-0.01	0.01	0.065	-0.02	0	0.001	0.014	0.0024	-0.11	0.3	0.72	-0.2	0.21	0.35	-0.45	0.34	0.18
Lipid	Secondary Bile Acid Metabolism	Glycohyocholate	42574				LC/MS Neg	5020	464.302	19.8255	1	0	0.01	0.61	-0.01	0	0.029	0	0.01	0.99	0	0	0.61	0	0	0.13	0	0	0.47	0	0	0.22	-0.01	0	0.028	0	0	0.52	0.0051	0.00027	0	0.28	0.99	-0.24	0.13	0.058	-0.16	0.13	0.25
Lipid	Secondary Bile Acid Metabolism	Glycolithocholate	31912	115245	C15557	HMDB00698	LC/MS Neg	5357.1	432.312	37.4306	1	-0.01	0.01	0.37	0	0.01	0.44	0	0.01	0.7	-0.02	0.01	0.02	-0.01	0	0.05	0	0.01	0.62	-0.01	0	0.037	-0.01	0.01	0.22	-0.01	0.01	0.083	0.087	0.011	-0.51	0.37	0.16	-0.08	0.16	0.64	-0.41	0.32	0.2
Lipid	Secondary Bile Acid Metabolism	Glycolithocholate sulfate*	32620	72222	C11301	HMDB02639	LC/MS Neg	5011	255.631	0.0793	2	-0.01	0.01	0.35	-0.01	0.01	0.24	0	0.01	0.84	-0.03	0.01	0.00043	-0.02	0	0.00093	0	0.01	0.58	-0.02	0.01	0.00024	-0.01	0.01	0.13	-0.02	0.01	0.0034	0.021	0.00062	-0.54	0.4	0.17	-0.44	0.25	0.079	0.18	0.47	0.7
Lipid	Secondary Bile Acid Metabolism	Glycoursodeoxycholate	39379	12310288		HMDB00708	LC/MS Neg	5033	448.307	0.793	1	-0.01	0	0.11	0	0	0.11	0.01	0.01	0.15	0	0	0.74	0	0	0.1	0	0	0.85	0	0	0.14	0	0	0.026	0	0	0.8	0.03	0.0001	-0.25	0.17	0.15	-0.04	0.04	0.36	-0.04	0.25	0.88
Lipid	Secondary Bile Acid Metabolism	Hyocholate	34093	92805	C17649	HMDB00760	LC/MS Neg	5046	407.28	19.5083	1	-0.01	0.01	0.52	-0.01	0.01	0.17	0	0.02	0.93	0	0.01	0.61	0	0.01	0.36	-0.01	0.01	0.39	0	0.01	0.73	-0.01	0.01	0.1	0	0.01	0.72	0.00013	2.7e-06	-0.04	0.42	0.92	-0.15	0.29	0.6	-0.73	0.71	0.31
Lipid	Secondary Bile Acid Metabolism	Isoursodeoxycholate	57577	127601	C17662	HMDB00686	LC/MS Neg	4809	391.285	0.793	1	-0.01	0	0.15	0	0	0.49	0.01	0.01	0.47	0	0	0.25	0	0	1	0	0	0.64	0	0	0.82	0	0	0.23	0	0	0.17	0.0028	3.2e-06	0.01	0.19	0.98	0.01	0.05	0.8	-0.16	0.34	0.63
Lipid	Secondary Bile Acid Metabolism	Lithocholate sulfate (1)	46706				LC/MS Neg	4840	227.12	12.3711	1	0	0.01	0.95	-0.01	0.01	0.059	0	0.01	0.96	-0.03	0.01	0.0036	-0.01	0	0.021	0	0.01	0.93	-0.02	0.01	0.0014	-0.01	0	0.14	-0.02	0.01	0.028	0.27	0.01	-0.29	0.18	0.12	-0.26	0.17	0.12	0.32	0.39	0.41
Lipid	Secondary Bile Acid Metabolism	Taurocholenate sulfate	32807				LC/MS Neg	4750	279.614	0.0793	1	0.01	0.01	0.58	0.01	0.01	0.63	-0.02	0.01	0.085	-0.03	0.01	0.013	-0.01	0.01	0.027	-0.01	0.01	0.21	-0.01	0.01	0.054	0.01	0.01	0.42	-0.02	0.01	0.0025	0.0024	0.0087	0.32	0.46	0.49	0.32	0.29	0.28	-0.86	0.33	0.011
Lipid	Secondary Bile Acid Metabolism	Taurodeoxycholate	12261	2733768	C05463	HMDB00896	LC/MS Neg	5257.4	498.289	12.8469	1	0	0	0.24	0	0	0.57	0	0.01	0.58	0	0.01	0.77	0	0	0.68	0	0	0.24	0	0	0.72	0	0	0.95	0	0	0.49	0.16	0.00044	0.1	0.13	0.48	0.02	0.09	0.86	0.48	0.36	0.18
Lipid	Secondary Bile Acid Metabolism	Taurodeoxycholic acid 3-sulfate	46655				LC/MS Neg	4855	288.62	16.8914	1	0.01	0.01	0.19	0	0.01	0.79	-0.01	0.01	0.19	-0.01	0.01	0.029	-0.01	0	0.087	0	0.01	0.79	-0.01	0	0.049	0	0	0.59	-0.01	0.01	0.0094	0.045	0.22	0.27	0.28	0.33	0.05	0.16	0.73	-0.49	0.44	0.26
Lipid	Secondary Bile Acid Metabolism	Taurolithocholate	31889	10595	C02592	HMDB00722	LC/MS Neg	5345	482.295	91.4354	1	.	.	.	.	.	.	.	.	.	.	.	.	.	.	.	.	.	.	.	.	.	.	.	.	.	.	.	.	.	.	.	.	.	.	.	.	.	.
Lipid	Secondary Bile Acid Metabolism	Taurolithocholate 3-sulfate	36850	440071	C03642	HMDB02580	LC/MS Neg	5027	280.622	4.1237	1	0.01	0.01	0.33	0.01	0.01	0.31	0	0.01	0.61	-0.02	0.01	0.046	0	0	0.99	0.01	0.01	0.3	-0.01	0.01	0.32	0.01	0.01	0.15	-0.01	0.01	0.24	0.031	0.016	0.19	0.33	0.56	-0.06	0.16	0.69	-0.17	0.38	0.65
Lipid	Secondary Bile Acid Metabolism	Tauroursodeoxycholate	39378	9848818		HMDB00874	LC/MS Neg	5025	498.289	56.9389	1	0	0.02	0.8	-0.02	0.01	0.076	0.01	0.02	0.53	0.02	0.02	0.32	0	0.01	0.59	0	0.01	0.94	0	0.01	0.59	-0.02	0.01	0.06	0.01	0.01	0.24	2.1e-05	1.5e-09	0.24	0.6	0.69	-0.06	0.32	0.86	0.07	0.96	0.95
Lipid	Secondary Bile Acid Metabolism	Ursocholate	57573				LC/MS Neg	4648	407.28	83.8224	1	.	.	.	.	.	.	.	.	.	.	.	.	.	.	.	.	.	.	.	.	.	.	.	.	.	.	.	.	.	.	.	.	.	.	.	.	.	.
Lipid	Secondary Bile Acid Metabolism	Ursodeoxycholate	1605	31401	C07880	HMDB00946	LC/MS Neg	5055	391.285	15.6225	1	-0.01	0.01	0.25	-0.01	0	0.17	0	0.01	0.81	0.01	0.01	0.3	0	0	0.39	-0.01	0.01	0.28	0	0	0.83	-0.01	0	0.049	0	0.01	0.39	0.0005	1.8e-06	-0.41	0.27	0.13	-0.05	0.11	0.63	-0.4	0.55	0.47
Lipid	Short Chain Fatty Acid	Valerate (5:0)	33443	7991	C00803	HMDB00892	LC/MS Neg	1718	101.061	19.429	1	.	.	.	.	.	.	.	.	.	.	.	.	.	.	.	.	.	.	.	.	.	.	.	.	.	.	.	.	.	.	.	.	.	.	.	.	.	.
Lipid	Sphingolipid Metabolism	Behenoyl dihydrosphingomyelin (d18:0/22:0)*	57331			HMDB12091	LC/MS Pos Late	3150	789.684	0	2	0.04	0.02	0.097	0.02	0.02	0.2	0.01	0.04	0.73	-0.02	0.03	0.53	0.01	0.01	0.23	0.04	0.02	0.07	0.01	0.01	0.66	0.03	0.01	0.061	-0.01	0.02	0.72	0.00077	8.5e-07	-0.59	0.78	0.45	0.99	0.5	0.046	-0.82	1.85	0.66
Lipid	Sphingolipid Metabolism	Behenoyl sphingomyelin (d18:1/22:0)*	48492			HMDB12103	LC/MS Pos Late	3083	787.669	0	2	0.05	0.06	0.34	0.18	0.05	0.00021	0.18	0.08	0.019	0.19	0.06	0.0018	0.17	0.03	1.1e-08	0.13	0.05	0.0033	0.18	0.04	1e-06	0.13	0.04	0.00039	0.2	0.05	3.6e-05	1.3e-05	4.9e-10	-0.44	2.15	0.84	3.33	1.35	0.014	2.68	3.28	0.41
Lipid	Sphingolipid Metabolism	Lactosyl-N-behenoyl-sphingosine (d18:1/22:0)*	57422				LC/MS Pos Late	3842	946.719	0.3172	2	0.01	0.03	0.81	0.02	0.02	0.38	-0.03	0.04	0.54	0.05	0.03	0.091	0.02	0.02	0.15	-0.01	0.02	0.64	0.04	0.02	0.054	0.02	0.02	0.35	0.03	0.02	0.3	2.3e-07	9.1e-08	0.26	1.15	0.82	0.68	0.69	0.33	-3.23	1.86	0.085
Lipid	Sphingolipid Metabolism	Lignoceroyl sphingomyelin (d18:1/24:0)	57330				LC/MS Pos Late	3437	815.7	0	1	0.01	0.04	0.8	0.09	0.04	0.01	0.05	0.06	0.41	0.09	0.05	0.052	0.07	0.02	0.0013	0.04	0.03	0.24	0.09	0.03	0.0015	0.06	0.03	0.03	0.08	0.04	0.03	2.6e-07	3.3e-08	0.5	1.61	0.76	2.44	1.05	0.02	0.18	2.52	0.94
Lipid	Sphingolipid Metabolism	Myristoyl dihydrosphingomyelin (d18:0/14:0)*	57365			HMDB12085	LC/MS Pos Late	2060	677.559	0	2	0.02	0.04	0.7	0.05	0.02	0.027	-0.03	0.06	0.67	0.05	0.04	0.17	0.04	0.02	0.018	0	0.03	0.98	0.05	0.02	0.013	0.05	0.02	0.023	0.04	0.03	0.23	2.4e-05	1.1e-08	1.34	1.47	0.36	0.65	0.68	0.34	-3.45	2.57	0.18
Lipid	Sphingolipid Metabolism	N-behenoyl-sphingadienine (d18:2/22:0)*	57372				LC/MS Pos Late	3911	620.598	23.2355	2	.	.	.	.	.	.	.	.	.	.	.	.	.	.	.	.	.	.	.	.	.	.	.	.	.	.	.	.	.	.	.	.	.	.	.	.	.	.
Lipid	Sphingolipid Metabolism	N-palmitoyl-heptadecasphingosine (d17:1/16:0)*	57430				LC/MS Pos Late	2645	524.504	41.1578	2	-0.03	0.02	0.17	0.02	0.01	0.25	0	0.03	0.96	0.03	0.02	0.054	0.02	0.01	0.044	-0.01	0.02	0.48	0.03	0.01	0.017	0.01	0.01	0.62	0.03	0.02	0.064	3.6e-05	3.3e-07	-0.51	0.87	0.56	0.04	0.42	0.92	2.51	1.46	0.087
Lipid	Sphingolipid Metabolism	N-palmitoyl-sphingadienine (d18:2/16:0)*	57416				LC/MS Pos Late	2490	536.504	12.3711	2	0.03	0.03	0.34	0.02	0.02	0.31	-0.04	0.05	0.37	-0.01	0.03	0.69	0.01	0.02	0.54	0.01	0.02	0.62	0.01	0.02	0.73	0.02	0.02	0.17	-0.02	0.03	0.52	4.6e-05	1.1e-06	-0.44	1.06	0.68	0.61	0.66	0.36	3.02	2.06	0.15
Lipid	Sphingolipid Metabolism	N-palmitoyl-sphinganine (d18:0/16:0)	52604	5283572		HMDB11760	LC/MS Pos Late	3090	540.535	2.0619	1	0	0.02	0.95	-0.02	0.02	0.26	-0.01	0.03	0.8	-0.01	0.02	0.48	-0.01	0.01	0.16	0	0.02	0.78	-0.02	0.01	0.18	-0.01	0.01	0.3	-0.01	0.02	0.38	5e-05	3e-07	-1	0.73	0.17	-0.38	0.49	0.43	-1.21	1.19	0.31
Lipid	Sphingolipid Metabolism	N-stearoyl-sphinganine (d18:0/18:0)*	1759	5283573			LC/MS Pos Late	3526	568.566	33.6241	2	-0.01	0.01	0.099	-0.02	0.01	0.037	-0.03	0.02	0.19	-0.01	0.01	0.41	-0.02	0.01	0.0025	-0.02	0.01	0.043	-0.01	0.01	0.029	-0.02	0.01	0.0078	-0.01	0.01	0.14	0.0039	3.8e-05	-0.44	0.32	0.17	-0.34	0.22	0.13	0.02	0.85	0.98
Lipid	Sphingolipid Metabolism	Palmitoyl dihydrosphingomyelin (d18:0/16:0)*	52434	9939965			LC/MS Pos Late	2290	705.591	0	2	0.03	0.05	0.58	0.11	0.04	0.0087	-0.05	0.08	0.54	-0.01	0.06	0.86	0.03	0.03	0.19	-0.01	0.04	0.89	0.06	0.03	0.099	0.08	0.03	0.012	-0.02	0.05	0.61	3.4e-07	1.5e-07	-1.91	1.75	0.28	2.12	1.17	0.072	-5.37	3.18	0.094
Lipid	Sphingolipid Metabolism	Palmitoyl sphingomyelin (d18:1/16:0)	37506	9939941			LC/MS Pos Late	2168	703.575	0	1	-0.1	0.08	0.23	0.18	0.07	0.0095	0.02	0.13	0.87	0.02	0.1	0.81	0.06	0.04	0.18	-0.05	0.07	0.5	0.11	0.06	0.053	0.08	0.05	0.12	0.04	0.08	0.63	1.6e-07	1.8e-08	-2.84	3.24	0.38	1.78	1.98	0.37	-2.67	5.71	0.64
Lipid	Sphingolipid Metabolism	Sphinganine-1-phosphate	52605	520		HMDB01383	LC/MS Pos Late	1431	382.272	0.8723	1	0.01	0.03	0.75	0.03	0.03	0.33	0.05	0.05	0.33	0.03	0.04	0.47	0.03	0.02	0.13	0.03	0.03	0.33	0.03	0.02	0.22	0.02	0.02	0.4	0.04	0.03	0.21	2.6e-06	6.8e-09	-2.12	1.23	0.085	0.39	0.78	0.62	-0.08	2.16	0.97
Lipid	Sphingolipid Metabolism	Sphingomyelin (d17:1/16:0, d18:1/15:0, d16:1/17:0)*	52433				LC/MS Pos Late	2082	689.559	0	2	-0.01	0.05	0.77	0.17	0.04	6.1e-06	0.09	0.1	0.33	0.16	0.05	0.0038	0.13	0.03	2.9e-07	0.03	0.04	0.54	0.17	0.03	1.2e-07	0.11	0.03	0.00019	0.16	0.05	0.00073	3.8e-05	2.2e-10	1.18	1.87	0.53	1.54	1.09	0.16	0.92	4.04	0.82
Lipid	Sphingolipid Metabolism	Sphingomyelin (d17:2/16:0, d18:2/15:0)*	57483				LC/MS Pos Late	1837	687.544	0	2	0.02	0.03	0.41	0.08	0.02	0.00026	0.08	0.07	0.26	0.08	0.03	0.017	0.07	0.02	2.8e-06	0.04	0.03	0.13	0.08	0.02	2e-05	0.06	0.02	0.00024	0.09	0.03	0.0039	0.00097	2.3e-12	2.06	1.11	0.064	1.04	0.6	0.081	1.29	3.06	0.67
Lipid	Sphingolipid Metabolism	Sphingomyelin (d18:0/18:0, d19:0/17:0)*	57473			HMDB12087	LC/MS Pos Late	2362	733.622	0	2	-0.01	0.02	0.41	-0.01	0.02	0.44	-0.05	0.03	0.11	-0.02	0.02	0.38	-0.02	0.01	0.042	-0.02	0.01	0.14	-0.02	0.01	0.18	-0.01	0.01	0.24	-0.03	0.02	0.086	2.9e-05	2e-06	-0.55	0.55	0.32	0.03	0.43	0.94	0.16	1.49	0.92
Lipid	Sphingolipid Metabolism	Sphingomyelin (d18:0/20:0, d16:0/22:0)*	57476				LC/MS Pos Late	2600	761.653	0	2	0.01	0.02	0.52	0.02	0.01	0.11	0	0.04	0.99	0	0.02	0.87	0.01	0.01	0.15	0.02	0.02	0.37	0.01	0.01	0.24	0.02	0.01	0.1	0.01	0.02	0.8	0.00019	3.5e-07	-0.03	0.73	0.96	0.55	0.4	0.17	0.69	1.75	0.69
Lipid	Sphingolipid Metabolism	Sphingomyelin (d18:1/14:0, d16:1/16:0)*	42463	11433862		HMDB12097	LC/MS Pos Late	1998	675.544	0	2	0.01	0.06	0.85	0.13	0.04	0.0013	0.12	0.09	0.21	0.15	0.05	0.0077	0.12	0.03	6.8e-06	0.06	0.05	0.23	0.14	0.03	2.2e-05	0.1	0.03	0.0025	0.15	0.05	0.0016	0.00047	4.3e-11	2.64	2.16	0.22	1.03	1.11	0.35	3.27	4.07	0.42
Lipid	Sphingolipid Metabolism	Sphingomyelin (d18:1/17:0, d17:1/18:0, d19:1/16:0)	52615				LC/MS Pos Late	2312	717.591	0	1	-0.04	0.04	0.36	0.14	0.04	7.1e-05	0.06	0.07	0.43	0.16	0.05	0.0016	0.11	0.02	4e-06	0.01	0.04	0.89	0.15	0.03	3.1e-07	0.08	0.03	0.004	0.15	0.04	0.00062	9.7e-08	2.4e-10	0.79	1.7	0.64	0.96	1.03	0.35	3.94	3.18	0.22
Lipid	Sphingolipid Metabolism	Sphingomyelin (d18:1/18:1, d18:2/18:0)	37529	6443882		HMDB12101	LC/MS Pos Late	2167	729.591	0	1	-0.06	0.04	0.18	0.03	0.04	0.41	-0.03	0.07	0.66	0.09	0.06	0.14	0.02	0.02	0.47	-0.04	0.04	0.29	0.05	0.03	0.13	0	0.03	0.93	0.05	0.05	0.29	4e-07	2.4e-09	0.52	1.6	0.74	0.7	1.07	0.51	1.92	2.94	0.51
Lipid	Sphingolipid Metabolism	Sphingomyelin (d18:1/19:0, d19:1/18:0)*	57475				LC/MS Pos Late	2330	745.622	0	2	0.01	0.03	0.73	0.08	0.02	0.0014	0.07	0.06	0.22	0.13	0.04	0.00091	0.08	0.02	8.8e-07	0.04	0.03	0.15	0.1	0.02	3.4e-06	0.06	0.02	0.0029	0.12	0.03	0.0002	1.3e-05	2.4e-12	1.54	1.22	0.21	0.51	0.72	0.48	4.01	2.44	0.1
Lipid	Sphingolipid Metabolism	Sphingomyelin (d18:1/20:0, d16:1/22:0)*	48490			HMDB12102	LC/MS Pos Late	2685	759.638	0	2	0.06	0.05	0.25	0.13	0.04	0.0024	0.08	0.08	0.3	0.13	0.06	0.036	0.12	0.03	9.1e-06	0.1	0.04	0.034	0.13	0.04	0.00019	0.11	0.03	0.0011	0.13	0.05	0.0086	2.4e-05	4.8e-10	2.74	2.09	0.19	1.26	1.23	0.3	6.31	3.33	0.06
Lipid	Sphingolipid Metabolism	Sphingomyelin (d18:1/20:1, d18:2/20:0)*	48491				LC/MS Pos Late	2383	757.622	0	2	-0.02	0.04	0.59	0.08	0.04	0.03	0.06	0.07	0.4	0.09	0.06	0.14	0.06	0.02	0.0093	0.01	0.03	0.68	0.08	0.03	0.0088	0.04	0.03	0.13	0.09	0.04	0.045	8.6e-08	1.4e-10	0.83	1.49	0.58	0.87	1.03	0.4	0.42	2.97	0.89
Lipid	Sphingolipid Metabolism	Sphingomyelin (d18:1/20:2, d18:2/20:1, d16:1/22:2)*	57481				LC/MS Pos Late	2039	755.606	0.1586	2	-0.02	0.03	0.49	0.02	0.02	0.4	0	0.06	0.98	0.07	0.04	0.12	0.02	0.02	0.28	-0.02	0.03	0.48	0.03	0.02	0.12	0.01	0.02	0.65	0.04	0.03	0.2	9.7e-07	4e-09	-0.47	1.08	0.66	0.35	0.62	0.57	-1.95	2.43	0.42
Lipid	Sphingolipid Metabolism	Sphingomyelin (d18:1/21:0, d17:1/22:0, d16:1/23:0)*	52495				LC/MS Pos Late	2793	773.653	0	2	0.01	0.03	0.76	0.1	0.02	1.1e-05	0.1	0.06	0.11	0.1	0.03	0.0015	0.09	0.01	6.6e-09	0.05	0.03	0.095	0.1	0.02	6.4e-08	0.07	0.02	5.7e-05	0.11	0.03	0.00011	3.9e-05	6.8e-12	0.96	1.14	0.4	1.39	0.63	0.027	2.67	2.55	0.3
Lipid	Sphingolipid Metabolism	Sphingomyelin (d18:1/22:1, d18:2/22:0, d16:1/24:1)*	48493			HMDB12104	LC/MS Pos Late	2666	785.653	0	2	0.04	0.06	0.54	0.21	0.05	7.8e-06	0.16	0.09	0.076	0.17	0.07	0.021	0.16	0.03	1.4e-07	0.1	0.05	0.039	0.19	0.04	1.9e-06	0.15	0.04	6e-05	0.18	0.06	0.0011	1.2e-07	1.9e-12	1.14	2.18	0.6	2.45	1.37	0.076	4.03	3.82	0.29
Lipid	Sphingolipid Metabolism	Sphingomyelin (d18:1/22:2, d18:2/22:1, d16:1/24:2)*	57477				LC/MS Pos Late	2209	783.637	0	2	-0.01	0.04	0.71	0.08	0.03	0.0051	-0.03	0.08	0.74	0.03	0.05	0.55	0.04	0.02	0.057	-0.02	0.04	0.49	0.07	0.03	0.014	0.05	0.02	0.022	0.02	0.04	0.69	2.4e-07	1.8e-08	-0.67	1.5	0.66	1.23	0.85	0.15	-6.27	3.37	0.065
Lipid	Sphingolipid Metabolism	Sphingomyelin (d18:1/24:1, d18:2/24:0)*	47153			HMDB12107	LC/MS Pos Late	3033	813.684	0	2	0	0.06	0.95	0.07	0.05	0.17	0.02	0.1	0.87	0	0.07	0.95	0.02	0.03	0.47	-0.01	0.05	0.87	0.04	0.04	0.35	0.04	0.04	0.28	0	0.06	0.95	4.2e-07	4.1e-08	-4.36	2.3	0.058	0.83	1.51	0.58	-4.96	4.1	0.23
Lipid	Sphingolipid Metabolism	Sphingomyelin (d18:1/25:0, d19:0/24:1, d20:1/23:0, d19:1/	57478				LC/MS Pos Late	3220	829.716	5.7891	2	0.03	0.03	0.29	0.07	0.02	0.00013	0.05	0.04	0.22	0.09	0.02	1.4e-05	0.07	0.01	1.6e-10	0.05	0.02	0.035	0.08	0.01	3.5e-09	0.06	0.01	9.4e-05	0.09	0.02	2.7e-06	0.00055	1.9e-07	0.87	1.03	0.4	0.98	0.5	0.053	2.27	1.8	0.21
Lipid	Sphingolipid Metabolism	Sphingomyelin (d18:2/14:0, d18:1/14:1)*	47154				LC/MS Pos Late	1860	673.528	0	2	0.02	0.03	0.48	0.06	0.02	0.0078	0.06	0.07	0.4	0.09	0.04	0.037	0.06	0.02	0.00059	0.03	0.03	0.34	0.06	0.02	0.0013	0.05	0.02	0.006	0.09	0.04	0.017	0.00024	8.4e-12	1.65	1.17	0.16	0.23	0.6	0.7	-1.89	3.08	0.54
Lipid	Sphingolipid Metabolism	Sphingomyelin (d18:2/16:0, d18:1/16:1)*	42459				LC/MS Pos Late	2002	701.559	0	2	-0.08	0.06	0.21	0.05	0.05	0.32	0.03	0.11	0.79	0.04	0.08	0.61	0.02	0.03	0.64	-0.04	0.05	0.48	0.04	0.04	0.32	0	0.04	0.95	0.04	0.06	0.51	6.8e-07	1.1e-08	-1.99	2.33	0.39	1.17	1.56	0.45	-1.13	4.57	0.81
Lipid	Sphingolipid Metabolism	Sphingomyelin (d18:2/18:1)*	57474				LC/MS Pos Late	1904	727.575	0	2	-0.03	0.03	0.44	0.03	0.02	0.23	0.02	0.06	0.68	0.06	0.04	0.17	0.02	0.02	0.16	-0.01	0.03	0.81	0.03	0.02	0.089	0.01	0.02	0.46	0.05	0.03	0.17	1.9e-06	2.3e-09	-0.61	1.27	0.63	1.38	0.63	0.03	0.26	2.5	0.92
Lipid	Sphingolipid Metabolism	Sphingomyelin (d18:2/21:0, d16:2/23:0)*	57480				LC/MS Pos Late	2330	771.637	0.0793	2	-0.01	0.03	0.72	0.06	0.02	0.026	0.06	0.07	0.39	0.1	0.04	0.024	0.05	0.02	0.0048	0.01	0.02	0.71	0.07	0.02	0.0019	0.03	0.02	0.12	0.09	0.04	0.0099	1.1e-06	6.3e-12	0.79	0.99	0.42	0.66	0.72	0.36	0.56	2.79	0.84
Lipid	Sphingolipid Metabolism	Sphingomyelin (d18:2/23:0, d18:1/23:1, d17:1/24:1)*	52435				LC/MS Pos Late	2845	799.669	0	2	-0.03	0.03	0.39	0.08	0.02	0.00073	0.06	0.06	0.34	0.09	0.04	0.021	0.06	0.02	0.00022	0	0.03	0.87	0.08	0.02	5.9e-05	0.04	0.02	0.018	0.09	0.03	0.0063	5.5e-08	2.5e-11	-0.1	1.12	0.93	1.29	0.68	0.058	-0.42	2.71	0.88
Lipid	Sphingolipid Metabolism	Sphingomyelin (d18:2/23:1)*	57482				LC/MS Pos Late	2315	797.653	0	2	-0.04	0.03	0.27	0.05	0.03	0.081	-0.01	0.07	0.89	0.04	0.05	0.41	0.02	0.02	0.26	-0.03	0.03	0.29	0.04	0.02	0.07	0.02	0.02	0.36	0.03	0.04	0.5	3.5e-07	2.5e-08	0.39	1.26	0.76	0.21	0.77	0.78	-4.12	3.02	0.17
Lipid	Sphingolipid Metabolism	Sphingomyelin (d18:2/24:1, d18:1/24:2)*	52437				LC/MS Pos Late	2635	811.669	0	2	-0.09	0.05	0.12	0.07	0.05	0.11	-0.09	0.09	0.34	-0.04	0.07	0.56	-0.01	0.03	0.7	-0.1	0.05	0.038	0.03	0.04	0.47	0.02	0.03	0.58	-0.06	0.06	0.29	5.3e-07	7.8e-07	-1.82	2.11	0.39	1.17	1.3	0.37	-6.54	4.08	0.11
Lipid	Sphingolipid Metabolism	Sphingomyelin (d18:2/24:2)*	57479				LC/MS Pos Late	2215	809.653	0	2	-0.03	0.03	0.37	0.05	0.03	0.061	-0.06	0.06	0.37	-0.03	0.05	0.57	0	0.02	0.92	-0.05	0.03	0.13	0.03	0.03	0.31	0.02	0.02	0.25	-0.04	0.04	0.31	5.2e-07	4.1e-06	-0.79	1.3	0.55	0.69	0.8	0.39	-7.11	2.59	0.0068
Lipid	Sphingolipid Metabolism	Sphingosine	17747	5353955	C00319	HMDB00252	LC/MS Pos Late	1393	300.29	24.4251	1	.	.	.	.	.	.	.	.	.	.	.	.	.	.	.	.	.	.	.	.	.	.	.	.	.	.	.	.	.	.	.	.	.	.	.	.	.	.
Lipid	Sphingolipid Metabolism	Sphingosine 1-phosphate	34445	5283560	C06124	HMDB00277	LC/MS Polar	1850	378.241	0	1	0.01	0.05	0.85	-0.02	0.04	0.6	0.04	0.09	0.64	0.01	0.06	0.84	0	0.03	0.91	0.03	0.05	0.55	-0.01	0.03	0.79	-0.02	0.03	0.57	0.02	0.05	0.62	3e-06	7.5e-09	-4.16	2.06	0.045	-0.08	1.17	0.95	-1.3	3.59	0.72
Lipid	Sphingolipid Metabolism	Stearoyl sphingomyelin (d18:1/18:0)	19503	6453725	C00550	HMDB01348	LC/MS Pos Late	2400	731.606	0	1	-0.04	0.04	0.37	0.07	0.04	0.078	-0.03	0.06	0.62	0.06	0.06	0.31	0.03	0.02	0.19	-0.03	0.04	0.46	0.06	0.03	0.053	0.03	0.03	0.32	0.03	0.04	0.49	1.8e-07	5.9e-09	0.66	1.7	0.7	0.73	1.11	0.51	2.73	2.78	0.33
Lipid	Sphingolipid Metabolism	Tricosanoyl sphingomyelin (d18:1/23:0)*	52436			HMDB12105	LC/MS Pos Late	3200	801.684	0	2	0	0.04	1	0.09	0.03	0.011	0.06	0.07	0.37	0.13	0.05	0.0044	0.09	0.02	9.3e-05	0.04	0.04	0.27	0.11	0.03	0.0001	0.06	0.03	0.034	0.12	0.04	0.0022	1.9e-06	7.8e-11	0.91	1.63	0.58	2.2	1	0.029	-0.31	2.96	0.92
Lipid	Sterol	3beta-hydroxy-5-cholestenoate	54805	165511	C17333		LC/MS Neg	5398	415.322	0	1	-0.03	0.03	0.41	0.01	0.02	0.57	0.07	0.04	0.076	-0.01	0.03	0.83	0.01	0.02	0.4	0.03	0.03	0.24	0	0.02	0.91	0	0.02	0.9	0.03	0.03	0.25	1.1e-05	3.1e-07	2.15	1.31	0.1	0.44	0.65	0.5	1.32	1.65	0.43
Lipid	Sterol	7-alpha-hydroxy-3-oxo-4-cholestenoate (7-Hoca)	36776	3081085	C17337	HMDB12458	LC/MS Neg	5288.1	429.301	0	1	-0.03	0.03	0.31	-0.04	0.02	0.09	-0.04	0.04	0.31	-0.04	0.03	0.16	-0.04	0.01	0.0056	-0.03	0.02	0.13	-0.04	0.02	0.033	-0.04	0.02	0.038	-0.04	0.02	0.076	1.8e-06	2.9e-08	-0.63	1.06	0.56	1.15	0.67	0.085	-1.12	1.56	0.47
Lipid	Sterol	Cholesterol	63	11025495	C00187	HMDB00067	LC/MS Pos Late	2707	369.352	0	1	0.01	0.04	0.75	0.03	0.03	0.34	0.01	0.06	0.83	0	0.04	0.94	0.01	0.02	0.55	0.02	0.03	0.64	0.01	0.02	0.56	0.02	0.02	0.36	0	0.03	0.94	2.7e-06	1.1e-07	-0.29	1.56	0.85	0.23	0.91	0.8	-1.09	2.7	0.69
Nucleotide	Purine and Pyrimidine Metabolism	Methylphosphate	37070	13130		HMDB61711	LC/MS Pos Early	544	113	9.2784	1	0	0.02	0.78	-0.05	0.02	0.0041	-0.06	0.03	0.024	-0.04	0.02	0.061	-0.04	0.01	0.00011	-0.02	0.01	0.12	-0.04	0.01	0.00065	-0.03	0.01	0.023	-0.05	0.02	0.0022	0.00087	3e-05	0.35	0.65	0.6	-0.88	0.46	0.058	-1.98	1.02	0.055
Nucleotide	Purine Metabolism, (Hypo)Xanthine/Inosine containi	Allantoin	1107	204	C02350	HMDB00462	LC/MS Polar	1672	157.037	0	1	-0.05	0.04	0.16	-0.06	0.03	0.05	-0.04	0.05	0.45	-0.11	0.04	0.0031	-0.07	0.02	4.4e-05	-0.05	0.03	0.077	-0.08	0.02	0.00051	-0.06	0.02	0.0095	-0.09	0.03	0.002	3.1e-06	1.2e-09	-3.49	1.3	0.0079	-0.51	0.89	0.57	-0.14	1.97	0.94
Nucleotide	Purine Metabolism, (Hypo)Xanthine/Inosine containi	Hypoxanthine	3127	790	C00262	HMDB00157	LC/MS Neg	1291.2	135.031	0	1	0.07	0.05	0.14	0.02	0.04	0.57	-0.05	0.07	0.5	-0.06	0.05	0.25	0	0.03	1	0.03	0.04	0.5	-0.01	0.03	0.74	0.04	0.03	0.21	-0.06	0.04	0.17	5.2e-06	1.7e-07	1.78	1.77	0.32	1.23	1.12	0.27	2.71	3.07	0.38
Nucleotide	Purine Metabolism, (Hypo)Xanthine/Inosine containi	Inosine	1123	6021	C00294	HMDB00195	LC/MS Neg	1602.1	267.073	0.0793	1	0	0.01	0.95	0.03	0.02	0.031	-0.01	0.02	0.71	-0.01	0.02	0.51	0.01	0.01	0.41	0	0.01	0.94	0.01	0.01	0.31	0.02	0.01	0.13	-0.01	0.01	0.66	4.2e-06	4.7e-05	-0.09	0.52	0.86	0.63	0.43	0.15	-0.27	0.81	0.74
Nucleotide	Purine Metabolism, (Hypo)Xanthine/Inosine containi	N1-methylinosine	48351	65095		HMDB02721	LC/MS Pos Early	1430	283.104	0.6344	1	-0.04	0.04	0.31	-0.17	0.03	1.1e-07	-0.02	0.01	0.22	-0.05	0.02	0.0042	-0.03	0.01	9.2e-05	-0.01	0.01	0.19	-0.07	0.01	3.6e-06	-0.12	0.02	6e-07	-0.03	0.01	0.0078	0.066	1.3e-12	-1.75	1.3	0.18	-2.06	0.84	0.015	-0.55	0.57	0.34
Nucleotide	Purine Metabolism, (Hypo)Xanthine/Inosine containi	Urate	1604	1175	C00366	HMDB00289	LC/MS Neg	757.1	167.021	0	1	-0.07	0.05	0.23	0.03	0.06	0.61	-0.02	0.09	0.79	0.09	0.07	0.21	0	0.03	0.91	-0.06	0.05	0.25	0.05	0.04	0.27	-0.02	0.04	0.58	0.04	0.06	0.5	3.3e-07	6e-08	-5.02	2.06	0.016	2.61	1.57	0.098	-1.31	3.78	0.73
Nucleotide	Purine Metabolism, (Hypo)Xanthine/Inosine containi	Xanthine	3147	1188	C00385	HMDB00292	LC/MS Neg	910	151.026	0	1	0.07	0.05	0.19	-0.02	0.04	0.53	0.07	0.05	0.22	-0.08	0.05	0.084	-0.02	0.02	0.49	0.07	0.04	0.069	-0.05	0.03	0.085	0	0.03	1	-0.03	0.04	0.35	3.9e-05	5.1e-08	2.19	1.87	0.24	-0.88	1.04	0.4	0.2	1.84	0.91
Nucleotide	Purine Metabolism, (Hypo)Xanthine/Inosine containi	Xanthosine	15136	64959	C01762	HMDB00299	LC/MS Neg	1075	283.068	34.7343	1	-0.02	0.02	0.23	-0.02	0.02	0.31	0	0.02	0.98	-0.04	0.02	0.024	-0.02	0.01	0.013	-0.01	0.01	0.38	-0.03	0.01	0.025	-0.02	0.01	0.14	-0.03	0.01	0.035	0.0057	4.6e-06	0.04	0.76	0.96	-0.06	0.51	0.91	-0.51	0.57	0.38
Nucleotide	Purine Metabolism, Adenine containing	Adenine	554	190	C00147	HMDB00034	LC/MS Pos Early	2221	136.062	0.0793	1	-0.06	0.03	0.066	-0.02	0.02	0.36	-0.09	0.04	0.026	0.01	0.02	0.59	-0.02	0.01	0.12	-0.07	0.02	0.0033	0	0.02	0.91	-0.03	0.02	0.078	-0.01	0.02	0.55	7.7e-08	1.7e-08	-2.71	1.19	0.023	-0.04	0.63	0.95	-3.24	1.7	0.059
Nucleotide	Purine Metabolism, Adenine containing	Adenosine	555	60961	C00212	HMDB00050	LC/MS Pos Early	2169	268.104	11.5781	1	0	0	0.98	0	0	0.35	0	0	0.72	0	0	0.58	0	0	0.49	0	0	0.84	0	0	0.29	0	0	0.57	0	0	0.72	0.76	0.37	0	0.01	0.74	-0.01	0.01	0.21	-0.02	0.02	0.25
Nucleotide	Purine Metabolism, Adenine containing	Adenosine 3',5'-cyclic monophosphate (cAMP)	2831	6076	C00575	HMDB00058	LC/MS Neg	1952.2	328.045	41.5543	1	-0.02	0.02	0.2	0.02	0.02	0.33	0.01	0.04	0.76	0	0.03	0.94	0	0.01	0.78	-0.01	0.02	0.46	0.01	0.01	0.44	0	0.01	0.96	0.01	0.02	0.79	5.5e-06	2.6e-06	0.22	0.62	0.73	0.63	0.45	0.16	-1.27	1.5	0.4
Nucleotide	Purine Metabolism, Adenine containing	Adenosine 5'-monophosphate (AMP)	32342	6083	C00020	HMDB00045	LC/MS Pos Early	1013	348.07	16.4155	1	0	0	0.99	0	0	0.98	0	0	0.49	-0.01	0.01	0.23	0	0	0.38	0	0	0.5	0	0	0.43	0	0	0.96	0	0	0.43	0.27	0.35	0	0.07	0.96	-0.01	0.13	0.94	-0.01	0.03	0.86
Nucleotide	Purine Metabolism, Adenine containing	N1-methyladenosine	15650	27476	C02494	HMDB03331	LC/MS Pos Early	2120	282.12	0	1	-0.2	0.08	0.019	-0.32	0.07	3.4e-06	-0.16	0.12	0.18	-0.35	0.09	0.00014	-0.3	0.04	2.5e-12	-0.21	0.07	0.0017	-0.33	0.05	1.7e-09	-0.27	0.05	2.2e-07	-0.32	0.07	1e-05	5.1e-08	1e-08	-4.13	3.13	0.19	-6.49	1.94	0.0009	-10.54	4.78	0.029
Nucleotide	Purine Metabolism, Adenine containing	N6-carbamoylthreonyladenosine	35157	161466		HMDB41623	LC/MS Neg	2164	411.127	0	1	-0.13	0.05	0.014	-0.2	0.05	1.6e-05	-0.03	0.02	0.19	-0.08	0.02	0.00043	-0.05	0.01	1.8e-05	-0.03	0.02	0.099	-0.08	0.02	6.1e-06	-0.17	0.03	7.3e-07	-0.05	0.01	0.00094	0.0049	1.6e-12	-3.24	1.97	0.1	-4.16	1.28	0.0012	-1.08	0.85	0.21
Nucleotide	Purine Metabolism, Adenine containing	N6-methyladenosine	37114	1869		HMDB04044	LC/MS Pos Early	2264	282.12	39.4925	1	.	.	.	.	.	.	.	.	.	.	.	.	.	.	.	.	.	.	.	.	.	.	.	.	.	.	.	.	.	.	.	.	.	.	.	.	.	.
Nucleotide	Purine Metabolism, Adenine containing	N6-succinyladenosine	48130	165243		HMDB00912	LC/MS Neg	940	382.1	19.1118	1	-0.03	0.02	0.11	-0.09	0.02	6.5e-05	-0.01	0.01	0.32	-0.04	0.01	0.00083	-0.03	0.01	6.4e-05	-0.01	0.01	0.18	-0.05	0.01	6.4e-06	-0.07	0.02	3.2e-05	-0.02	0.01	0.0035	0.18	5e-10	-0.94	0.76	0.22	-2.64	0.58	7.2e-06	-0.39	0.48	0.41
Nucleotide	Purine Metabolism, Guanine containing	7-methylguanine	35114	11361	C02242	HMDB00897	LC/MS Neg	1729.7	164.058	0	1	-0.04	0.06	0.53	-0.2	0.05	0.00016	-0.24	0.08	0.0035	-0.2	0.06	0.0017	-0.19	0.03	1.6e-09	-0.15	0.05	0.0013	-0.2	0.04	4.5e-07	-0.13	0.04	0.00078	-0.23	0.05	5.2e-06	5.1e-05	2e-08	-3.18	2.31	0.17	-2.42	1.45	0.096	-8.68	3.17	0.0069
Nucleotide	Purine Metabolism, Guanine containing	Guanine	32352	764	C00242	HMDB00132	LC/MS Pos Early	2032	152.057	29.3418	1	0.02	0.01	0.023	0.02	0.01	0.0095	0	0.02	0.99	-0.01	0.01	0.26	0.01	0.01	0.044	0.02	0.01	0.033	0.01	0.01	0.28	0.02	0.01	0.00071	-0.01	0.01	0.45	0.018	0.078	0.72	0.42	0.09	0.27	0.25	0.28	-0.22	0.7	0.75
Nucleotide	Purine Metabolism, Guanine containing	Guanosine	1573	6802	C00387	HMDB00133	LC/MS Neg	1662	282.084	0	1	0.01	0.02	0.76	0.04	0.02	0.02	-0.01	0.03	0.58	0	0.02	0.87	0.01	0.01	0.19	0	0.01	0.94	0.02	0.01	0.13	0.02	0.01	0.067	0	0.02	0.83	7.6e-07	1.4e-05	0.02	0.63	0.98	0.58	0.47	0.22	-0.22	1.07	0.84
Nucleotide	Purine Metabolism, Guanine containing	N2,N2-dimethylguanosine	35137	92919		HMDB04824	LC/MS Pos Early	2210	312.13	0	1	-0.12	0.05	0.011	-0.22	0.05	6e-06	-0.06	0.04	0.09	-0.09	0.03	0.00075	-0.09	0.02	1.2e-07	-0.06	0.03	0.013	-0.1	0.02	3.1e-06	-0.18	0.03	3.3e-07	-0.08	0.02	0.00011	0.0003	5.9e-11	-3.06	1.84	0.098	-1.66	1.34	0.22	-2.2	1.53	0.15
Nucleotide	Pyrimidine Metabolism, Cytidine containing	2'-O-methylcytidine	57554	150971			LC/MS Pos Early	2411	258.108	0	1	0.03	0.04	0.49	0.07	0.04	0.096	-0.03	0.06	0.58	0.03	0.05	0.55	0.02	0.02	0.3	0	0.03	0.88	0.05	0.03	0.16	0.05	0.03	0.065	0	0.04	0.98	1.9e-07	4.5e-07	-2.83	1.48	0.057	1.05	1.18	0.37	-2.31	2.37	0.33
Nucleotide	Pyrimidine Metabolism, Cytidine containing	3-methylcytidine	35132	159649			LC/MS Pos Early	2176	258.108	1.4274	1	0.02	0.04	0.56	0.01	0.03	0.76	0.01	0.06	0.85	0.02	0.03	0.53	0.01	0.02	0.46	0.01	0.03	0.83	0.02	0.02	0.49	0.02	0.02	0.53	0.02	0.03	0.55	6.2e-06	2.1e-07	1.67	1.56	0.29	0.75	0.85	0.38	-0.89	2.27	0.7
Nucleotide	Pyrimidine Metabolism, Cytidine containing	Cytidine	514	6175	C00475	HMDB00089	LC/MS Pos Early	2124	244.093	2.8549	1	-0.03	0.02	0.049	-0.04	0.01	0.0031	-0.01	0.02	0.77	-0.01	0.01	0.3	-0.02	0.01	0.00094	-0.02	0.01	0.087	-0.02	0.01	0.012	-0.04	0.01	0.00023	-0.01	0.01	0.17	3e-05	5.3e-08	-1.18	0.59	0.045	-0.33	0.34	0.33	-2.42	0.96	0.013
Nucleotide	Pyrimidine Metabolism, Cytidine containing	Cytosine	573	597	C00380	HMDB00630	LC/MS Pos Early	2060	112.051	76.2887	1	0.02	0.02	0.4	-0.03	0.02	0.034	-0.03	0.02	0.24	-0.03	0.02	0.17	-0.02	0.01	0.018	-0.01	0.01	0.39	-0.03	0.01	0.018	-0.01	0.01	0.21	-0.03	0.01	0.064	8e-05	7.7e-07	-0.53	0.72	0.46	0.36	0.42	0.39	-1.34	0.96	0.17
Nucleotide	Pyrimidine Metabolism, Cytidine containing	N4-acetylcytidine	35130	107461		HMDB05923	LC/MS Neg	2040	284.089	6.6614	1	-0.04	0.02	0.018	-0.09	0.01	1.6e-10	-0.04	0.03	0.18	-0.04	0.02	0.039	-0.06	0.01	6.4e-11	-0.04	0.02	0.0052	-0.06	0.01	3.4e-08	-0.07	0.01	1.4e-11	-0.04	0.01	0.003	9.2e-06	5e-09	-1.89	0.66	0.0047	-0.9	0.39	0.023	-3.75	1.16	0.0014
Nucleotide	Pyrimidine Metabolism, Orotate containing	Dihydroorotate	601	648	C00337	HMDB03349	LC/MS Polar	1910	157.025	0.0793	1	-0.03	0.03	0.28	0.01	0.02	0.79	-0.08	0.03	0.0066	-0.04	0.02	0.074	-0.03	0.01	0.0082	-0.06	0.02	0.0037	-0.02	0.01	0.25	-0.01	0.02	0.75	-0.05	0.02	0.0015	1.2e-07	1.1e-06	-1.41	1.18	0.23	-1.34	0.58	0.023	-2.16	1.22	0.078
Nucleotide	Pyrimidine Metabolism, Orotate containing	Orotate	1505	967	C00295	HMDB00226	LC/MS Polar	1638.1	155.01	0	1	0	0.04	0.96	0	0.02	0.75	-0.01	0.01	0.041	-0.01	0.01	0.32	-0.01	0	0.0017	-0.01	0	0.0054	-0.01	0.01	0.3	-0.01	0.01	0.67	-0.01	0.01	0.0062	0.00037	6.8e-06	0.85	1.33	0.52	-0.49	0.44	0.26	-0.42	0.24	0.081
Nucleotide	Pyrimidine Metabolism, Orotate containing	Orotidine	35172	92751		HMDB00788	LC/MS Polar	2250	287.052	0.2379	1	-0.14	0.04	0.00012	0	0	0.25	0	0	0.034	-0.01	0	0.095	0	0	0.00044	0	0	0.0051	0	0	0.07	-0.01	0	0.094	0	0	0.003	0.28	0.013	-3.95	1.34	0.0035	-0.2	0.1	0.042	-0.09	0.06	0.15
Nucleotide	Pyrimidine Metabolism, Thymine containing	3-aminoisobutyrate	1566	64956	C05145	HMDB03911	LC/MS Pos Early	2190	104.071	0.0793	1	-0.02	0.02	0.2	0.01	0.02	0.6	0	0.02	0.99	0.02	0.02	0.46	0	0.01	0.8	-0.01	0.01	0.38	0.01	0.01	0.33	0	0.01	0.8	0.01	0.01	0.64	1.7e-06	4e-07	-0.53	0.66	0.42	0.13	0.47	0.78	-0.14	0.68	0.84
Nucleotide	Pyrimidine Metabolism, Thymine containing	5,6-dihydrothymine	1418	93556	C00906	HMDB00079	LC/MS Neg	1637.8	127.051	0.1586	1	-0.05	0.04	0.23	0.02	0.03	0.58	-0.04	0.05	0.44	0.01	0.03	0.72	-0.01	0.02	0.51	-0.06	0.03	0.054	0.01	0.02	0.53	0	0.02	0.86	-0.01	0.03	0.7	1.8e-07	3.5e-08	-0.17	1.49	0.91	0.77	0.86	0.37	-3.5	1.73	0.045
Nucleotide	Pyrimidine Metabolism, Thymine containing	Thymine	604	1135	C00178	HMDB00262	LC/MS Neg	1654	125.036	98.8105	1	.	.	.	.	.	.	.	.	.	.	.	.	.	.	.	.	.	.	.	.	.	.	.	.	.	.	.	.	.	.	.	.	.	.	.	.	.	.
Nucleotide	Pyrimidine Metabolism, Uracil containing	2'-deoxyuridine	52602	13712	C00526	HMDB00012	LC/MS Neg	1586	227.067	0.0793	1	0.1	0.05	0.03	0.04	0.04	0.28	0.01	0.06	0.81	0.04	0.04	0.27	0.05	0.02	0.038	0.06	0.04	0.12	0.05	0.03	0.1	0.06	0.03	0.036	0.03	0.03	0.38	2.2e-06	2.8e-06	1.29	1.79	0.47	0.07	1.15	0.95	3.85	2.41	0.11
Nucleotide	Pyrimidine Metabolism, Uracil containing	2'-O-methyluridine	57655	102212			LC/MS Neg	1831	257.078	9.2784	1	0	0.01	0.76	0	0.01	0.78	0	0.02	0.92	-0.02	0.02	0.33	0	0.01	0.69	0	0.01	0.76	0	0.01	0.83	0	0.01	0.95	-0.01	0.01	0.31	0.00035	0.00068	-0.13	0.36	0.72	0.09	0.19	0.62	-1.71	0.7	0.015
Nucleotide	Pyrimidine Metabolism, Uracil containing	3-(3-amino-3-carboxypropyl)uridine*	52525				LC/MS Neg	1391	344.11	3.1721	2	-0.09	0.04	0.015	-0.13	0.04	0.001	-0.02	0.02	0.21	-0.07	0.02	0.00032	-0.04	0.01	8.1e-05	-0.02	0.01	0.12	-0.06	0.01	1.8e-05	-0.12	0.03	2.9e-05	-0.04	0.01	0.0015	0.026	6e-12	-4.23	1.44	0.0036	-2.26	1.01	0.025	-0.63	0.65	0.33
Nucleotide	Pyrimidine Metabolism, Uracil containing	3-ureidopropionate	3155	111	C02642	HMDB00026	LC/MS Pos Early	875	133.061	0	1	-0.01	0.02	0.68	-0.01	0.02	0.78	-0.02	0.02	0.17	-0.02	0.01	0.091	-0.02	0.01	0.0091	-0.02	0.01	0.094	-0.02	0.01	0.066	-0.01	0.01	0.59	-0.03	0.01	0.017	6.8e-05	1.7e-05	-1.24	0.63	0.048	-0.36	0.57	0.52	-1.31	0.55	0.019
Nucleotide	Pyrimidine Metabolism, Uracil containing	5,6-dihydrouridine	61833	94312			LC/MS Neg	1119	245.078	0	1	-0.14	0.05	0.0036	-0.27	0.04	1.1e-09	-0.09	0.05	0.067	-0.11	0.03	0.0017	-0.13	0.02	6.2e-11	-0.1	0.03	0.0015	-0.14	0.03	3.3e-08	-0.21	0.03	5.4e-11	-0.11	0.03	0.00015	1.2e-06	4.8e-10	-5.52	1.76	0.0019	-3.33	1.24	0.0075	-4.35	2.08	0.038
Nucleotide	Pyrimidine Metabolism, Uracil containing	5-methyluridine (ribothymidine)	35136	445408		HMDB00884	LC/MS Neg	1778.1	257.078	0	1	0.1	0.07	0.17	0.12	0.06	0.046	0.18	0.1	0.067	0.09	0.07	0.21	0.12	0.04	0.00059	0.16	0.06	0.0069	0.1	0.04	0.022	0.11	0.05	0.013	0.12	0.06	0.035	4.7e-06	2.4e-06	2.32	2.64	0.38	2.09	1.66	0.21	7.02	4.09	0.088
Nucleotide	Pyrimidine Metabolism, Uracil containing	Beta-alanine	55	239	C00099	HMDB00056	LC/MS Pos Early	1905	90.055	0	1	-0.01	0.03	0.71	-0.04	0.04	0.3	0.01	0.04	0.8	-0.02	0.04	0.59	-0.02	0.02	0.26	-0.01	0.02	0.78	-0.03	0.03	0.26	-0.03	0.02	0.25	-0.01	0.03	0.66	9.5e-06	1.1e-08	0.26	1.31	0.84	0.65	0.98	0.51	-0.61	1.5	0.69
Nucleotide	Pyrimidine Metabolism, Uracil containing	N-acetyl-beta-alanine	37432	76406	C01073		LC/MS Neg	773	130.051	0.7137	1	.	.	.	.	.	.	.	.	.	.	.	.	.	.	.	.	.	.	.	.	.	.	.	.	.	.	.	.	.	.	.	.	.	.	.	.	.	.
Nucleotide	Pyrimidine Metabolism, Uracil containing	Pseudouridine	33442	15047	C02067	HMDB00767	LC/MS Polar	1929.3	243.062	0	1	-0.22	0.05	4e-05	-0.2	0.05	8.4e-05	-0.06	0.03	0.014	-0.1	0.03	0.001	-0.09	0.02	8.5e-09	-0.07	0.02	0.00022	-0.11	0.02	1.4e-05	-0.21	0.04	1.3e-08	-0.08	0.02	3.1e-05	0.00011	1.9e-12	-5.54	2.04	0.0072	-3.92	1.39	0.0049	-2.12	1.07	0.049
Nucleotide	Pyrimidine Metabolism, Uracil containing	Uracil	605	1174	C00106	HMDB00300	LC/MS Polar	1089.7	111.02	39.1753	1	0.01	0.02	0.7	0	0	0.11	0.01	0.04	0.89	0.05	0.03	0.083	0	0	0.13	0.01	0.02	0.57	0	0	0.13	0	0	0.1	0.03	0.02	0.15	0.00044	1.1e-08	-0.12	0.93	0.9	0.01	0.02	0.51	3.19	1.58	0.046
Nucleotide	Pyrimidine Metabolism, Uracil containing	Uridine	606	6029	C00299	HMDB00296	LC/MS Neg	1457.6	243.062	0	1	0.03	0.06	0.59	0.23	0.05	2.3e-06	0.08	0.08	0.32	0.1	0.06	0.087	0.14	0.03	1.3e-06	0.08	0.05	0.082	0.16	0.04	1.2e-05	0.16	0.04	1.7e-05	0.12	0.05	0.015	2.8e-06	5.4e-07	-1.12	2.22	0.61	1.16	1.35	0.39	5.29	3.4	0.12
Partially Characterized Molecules	Partially Characterized Molecules	Glucuronide of C10H14O2 (1)*	48032				LC/MS Neg	3212	341.125	93.18	2	.	.	.	.	.	.	.	.	.	.	.	.	.	.	.	.	.	.	.	.	.	.	.	.	.	.	.	.	.	.	.	.	.	.	.	.	.	.
Partially Characterized Molecules	Partially Characterized Molecules	Glucuronide of C10H18O2 (1)*	48000				LC/MS Neg	2721	345.156	68.517	2	0.01	0.01	0.52	-0.03	0.01	0.045	0.02	0.02	0.37	-0.02	0.02	0.32	-0.01	0.01	0.29	0.01	0.01	0.34	-0.02	0.01	0.045	-0.01	0.01	0.25	0	0.01	0.79	0.0017	4.4e-08	-1	0.55	0.07	-0.18	0.42	0.67	1.25	0.84	0.14
Partially Characterized Molecules	Partially Characterized Molecules	Glucuronide of C10H18O2 (5)*	47951				LC/MS Neg	3590	345.156	92.7835	2	.	.	.	.	.	.	.	.	.	.	.	.	.	.	.	.	.	.	.	.	.	.	.	.	.	.	.	.	.	.	.	.	.	.	.	.	.	.
Partially Characterized Molecules	Partially Characterized Molecules	Glucuronide of C10H18O2 (7)*	46480				LC/MS Neg	3802	345.156	32.4346	2	0	0	0.68	0	0	0.53	0	0	0.97	0	0	0.045	0	0	0.71	0	0	0.75	0	0	0.15	0	0	0.66	0	0	0.49	0.3	0.64	-0.15	0.09	0.1	0.01	0.03	0.61	0	0.01	0.94
Partially Characterized Molecules	Partially Characterized Molecules	Glucuronide of C12H22O4 (1)*	46991				LC/MS Neg	2610	405.178	78.9849	2	0	0.02	0.91	-0.03	0.02	0.092	-0.04	0.03	0.12	-0.02	0.02	0.22	-0.02	0.01	0.014	-0.02	0.02	0.19	-0.03	0.01	0.036	-0.02	0.01	0.17	-0.03	0.02	0.036	2.2e-05	2.4e-07	0.01	0.8	0.99	-0.27	0.46	0.55	0.21	1.13	0.85
Partially Characterized Molecules	Partially Characterized Molecules	Glucuronide of C12H22O4 (1)*	47779				LC/MS Neg	3869	345.156	78.747	2	0	0.02	0.83	-0.04	0.02	0.028	-0.01	0.02	0.52	-0.03	0.02	0.089	-0.02	0.01	0.0098	-0.01	0.01	0.41	-0.04	0.01	0.008	-0.02	0.01	0.082	-0.03	0.01	0.066	0.0009	7.3e-08	-1.47	0.67	0.029	-0.26	0.5	0.6	0.79	0.88	0.37
Partially Characterized Molecules	Partially Characterized Molecules	Glucuronide of C14H22O4 (2)*	48044				LC/MS Neg	3934	429.178	44.1713	2	-0.01	0.02	0.51	-0.02	0.01	0.12	-0.01	0.01	0.18	-0.02	0.01	0.07	-0.01	0	0.053	-0.01	0.01	0.26	-0.02	0.01	0.04	-0.02	0.01	0.11	-0.01	0.01	0.067	0.2	1.5e-05	-0.43	0.57	0.46	-0.24	0.33	0.47	-0.02	0.28	0.95
Partially Characterized Molecules	Partially Characterized Molecules	Glucuronide of C14H26O4 (1)*	47948				LC/MS Neg	3209	433.209	82.4742	2	.	.	.	.	.	.	.	.	.	.	.	.	.	.	.	.	.	.	.	.	.	.	.	.	.	.	.	.	.	.	.	.	.	.	.	.	.	.
Partially Characterized Molecules	Partially Characterized Molecules	Glucuronide of C19H28O4 (1)*	48002				LC/MS Neg	3398	495.224	91.6733	2	.	.	.	.	.	.	.	.	.	.	.	.	.	.	.	.	.	.	.	.	.	.	.	.	.	.	.	.	.	.	.	.	.	.	.	.	.	.
Partially Characterized Molecules	Partially Characterized Molecules	Glucuronide of C8H16O2 (2)*	47027				LC/MS Neg	4375	319.141	99.4449	2	.	.	.	.	.	.	.	.	.	.	.	.	.	.	.	.	.	.	.	.	.	.	.	.	.	.	.	.	.	.	.	.	.	.	.	.	.	.
Partially Characterized Molecules	Partially Characterized Molecules	Glucuronide of piperine metabolite C17H21NO3 (3)*	46728				LC/MS Neg	3975	462.177	5.0753	2	0.01	0.01	0.48	0.01	0.01	0.43	0	0.01	0.7	-0.01	0.01	0.31	0	0.01	0.91	0.01	0.01	0.36	0	0.01	0.69	0.01	0.01	0.3	-0.01	0.01	0.48	0.0029	0.0013	-0.32	0.43	0.45	0.02	0.26	0.95	0.23	0.5	0.64
Partially Characterized Molecules	Partially Characterized Molecules	Glucuronide of piperine metabolite C17H21NO3 (5)*	46726				LC/MS Pos Early	3316	464.192	41.0785	2	0.01	0.01	0.47	0.01	0.01	0.3	0.01	0.01	0.7	-0.01	0.01	0.16	0	0.01	0.9	0.01	0.01	0.37	0	0.01	0.5	0.01	0.01	0.22	-0.01	0.01	0.29	0.024	0.027	-0.34	0.47	0.46	0.05	0.3	0.86	0.41	0.58	0.48
Partially Characterized Molecules	Partially Characterized Molecules	Glutamine conjugate of C8H12O2 (1)*	48029				LC/MS Neg	3091	267.135	96.3521	2	.	.	.	.	.	.	.	.	.	.	.	.	.	.	.	.	.	.	.	.	.	.	.	.	.	.	.	.	.	.	.	.	.	.	.	.	.	.
Partially Characterized Molecules	Partially Characterized Molecules	Glutamine conjugate of C8H12O2 (2)*	47003				LC/MS Neg	3240	267.136	79.8573	2	-0.01	0.02	0.47	-0.02	0.02	0.27	0.02	0.03	0.55	-0.03	0.02	0.11	-0.02	0.01	0.096	0	0.02	0.97	-0.02	0.01	0.064	-0.02	0.01	0.19	-0.02	0.02	0.24	0.00012	5.5e-08	-0.36	0.73	0.62	-0.21	0.45	0.64	-2.15	1.12	0.057
Partially Characterized Molecules	Partially Characterized Molecules	Glutamine conjugate of C8H12O4 (1)*	47973				LC/MS Neg	951	299.125	53.7669	2	-0.01	0.02	0.7	0.02	0.01	0.069	0.03	0.03	0.25	0	0.02	0.96	0.01	0.01	0.31	0	0.02	0.8	0.01	0.01	0.18	0.01	0.01	0.2	0	0.01	1	8.4e-06	1.2e-06	-0.43	0.68	0.53	0.73	0.32	0.023	-0.82	1.18	0.49
Partially Characterized Molecules	Partially Characterized Molecules	Glycine conjugate of C10H12O2*	47021				LC/MS Neg	4010	220.099	10.8644	2	-0.04	0.02	0.057	0	0.02	0.78	0.01	0.02	0.59	-0.02	0.02	0.18	-0.01	0.01	0.39	0	0.01	0.86	-0.01	0.01	0.34	-0.02	0.01	0.22	-0.01	0.01	0.62	0.0008	1.9e-07	0.58	0.73	0.43	0.68	0.43	0.12	0.09	0.72	0.9
Partially Characterized Molecules	Partially Characterized Molecules	Glycine conjugate of C10H14O2 (1)*	47026				LC/MS Neg	4340	222.114	3.2514	2	-0.04	0.02	0.022	0	0.01	0.83	0.01	0.02	0.58	-0.01	0.02	0.54	-0.01	0.01	0.42	-0.01	0.01	0.31	0	0.01	0.89	-0.01	0.01	0.26	0	0.01	0.79	9.4e-06	1.7e-07	0.23	0.62	0.71	0.63	0.36	0.081	0.16	1.02	0.88
Partially Characterized Molecules	Partially Characterized Molecules	N-acetylglucosamine conjugate of C24H40O4 bile acid**	48036				LC/MS Neg	4648	594.366	61.5385	3	-0.03	0.01	0.042	-0.03	0.01	0.012	-0.02	0.03	0.39	-0.03	0.02	0.074	-0.03	0.01	9.2e-05	-0.03	0.01	0.022	-0.03	0.01	0.0032	-0.03	0.01	0.0011	-0.03	0.01	0.022	4.1e-06	6.2e-07	-1.1	0.54	0.041	-0.21	0.32	0.51	-1.04	1.05	0.32
Peptide	Acetylated Peptides	4-hydroxyphenylacetylglutamine	55017				LC/MS Neg	1650	279.099	17.05	1	-0.01	0.01	0.18	-0.02	0.01	0.0091	0	0	0.48	-0.01	0	0.016	0	0	0.02	0	0	0.57	-0.01	0	0.0093	-0.02	0.01	0.0023	0	0	0.034	0.93	1e-06	-0.07	0.28	0.8	-0.43	0.2	0.033	-0.05	0.1	0.63
Peptide	Acetylated Peptides	Phenylacetylcarnitine	48425	101724840			LC/MS Pos Early	3092	280.154	29.2625	1	0	0.01	0.72	-0.01	0	0.052	-0.02	0.01	0.13	0	0.01	0.75	-0.01	0	0.013	-0.01	0.01	0.35	-0.01	0	0.054	-0.01	0	0.049	-0.01	0.01	0.1	0.0058	0.0072	-0.48	0.32	0.13	-0.05	0.12	0.7	-0.4	0.42	0.34
Peptide	Acetylated Peptides	Phenylacetylglutamate	52925	11579826		HMDB59772	LC/MS Neg	1630	264.088	35.5274	1	-0.02	0.02	0.35	-0.04	0.01	0.0001	0	0	0.6	-0.02	0.01	0.0096	0	0	0.2	0	0	0.85	-0.02	0.01	8.5e-05	-0.04	0.01	3e-05	0	0	0.34	0.069	7.7e-10	-1.31	0.61	0.032	-0.5	0.29	0.087	-0.01	0.1	0.95
Peptide	Acetylated Peptides	Phenylacetylglutamine	35126	92258	C04148	HMDB06344	LC/MS Neg	2330	263.104	0	1	-0.03	0.02	0.17	-0.06	0.02	9.6e-05	-0.01	0.01	0.42	-0.06	0.02	0.002	-0.02	0.01	0.0005	-0.01	0.01	0.46	-0.06	0.01	2.3e-06	-0.05	0.01	1.9e-05	-0.02	0.01	0.034	0.23	2.3e-09	-1.71	0.75	0.023	-0.89	0.45	0.045	-0.08	0.46	0.87
Peptide	Acetylated Peptides	Phenylacetylmethionine	54736				LC/MS Neg	3620	266.086	78.0333	1	-0.01	0.02	0.6	-0.03	0.02	0.11	-0.02	0.02	0.42	-0.04	0.02	0.059	-0.03	0.01	0.0065	-0.01	0.01	0.34	-0.03	0.01	0.015	-0.02	0.01	0.065	-0.03	0.02	0.031	8.4e-05	5.4e-07	-1.47	0.71	0.038	-0.27	0.43	0.52	-0.22	1.04	0.83
Peptide	Dipeptide	Cyclo(pro-arg)*	47435				LC/MS Pos Early	2514	254.161	66.5345	2	0	0.02	0.94	-0.01	0.01	0.59	-0.01	0.02	0.73	-0.02	0.02	0.15	-0.01	0.01	0.11	0	0.01	0.77	-0.02	0.01	0.12	-0.01	0.01	0.53	-0.02	0.01	0.11	4.6e-05	1.7e-06	0.27	0.61	0.66	0.03	0.36	0.93	0.06	0.96	0.95
Peptide	Dipeptide	Glycylvaline	18357	97417		HMDB28854	LC/MS Pos Early	2734	175.108	20.3013	1	0	0.01	0.92	-0.02	0.01	0.029	0	0.01	0.59	-0.01	0.01	0.4	-0.01	0	0.025	-0.01	0	0.29	-0.01	0.01	0.035	-0.01	0.01	0.055	-0.01	0	0.23	0.058	1.5e-05	0.14	0.51	0.78	-0.17	0.27	0.52	0.22	0.25	0.38
Peptide	Dipeptide	Histidylalanine	42027	351667		HMDB28878	LC/MS Neg	970	225.099	86.1221	1	.	.	.	.	.	.	.	.	.	.	.	.	.	.	.	.	.	.	.	.	.	.	.	.	.	.	.	.	.	.	.	.	.	.	.	.	.	.
Peptide	Dipeptide	Isoleucylglycine	40008	342532		HMDB28907	LC/MS Neg	1992	187.109	12.9262	1	-0.02	0.02	0.45	0.03	0.02	0.19	0.03	0.04	0.51	0.01	0.03	0.61	0.01	0.01	0.36	0	0.02	0.94	0.02	0.02	0.24	0.01	0.02	0.58	0.01	0.02	0.52	1e-06	4e-07	-0.79	0.91	0.39	0.94	0.56	0.094	-2.13	1.75	0.23
Peptide	Dipeptide	Leucylglutamine*	48189	4305457		HMDB28927	LC/MS Pos Early	2620	260.161	92.4663	2	.	.	.	.	.	.	.	.	.	.	.	.	.	.	.	.	.	.	.	.	.	.	.	.	.	.	.	.	.	.	.	.	.	.	.	.	.	.
Peptide	Dipeptide	Leucylglycine	40045	79070		HMDB28929	LC/MS Neg	2050	187.109	47.1848	1	0.02	0.02	0.34	0.01	0.01	0.38	0.01	0.04	0.7	-0.02	0.03	0.39	0.01	0.01	0.47	0.02	0.02	0.29	0	0.01	0.81	0.01	0.01	0.23	-0.01	0.02	0.7	0.0004	0.00013	-0.86	0.81	0.29	-0.17	0.32	0.59	-0.7	1.48	0.64
Peptide	Dipeptide	Phenylalanylglycine	41370	98207		HMDB28995	LC/MS Pos Early	2898	223.108	35.4481	1	.	.	.	.	.	.	.	.	.	.	.	.	.	.	.	.	.	.	.	.	.	.	.	.	.	.	.	.	.	.	.	.	.	.	.	.	.	.
Peptide	Dipeptide	Prolylglycine	40703	6426709		HMDB11178	LC/MS Pos Early	2136	173.092	13.1642	1	-0.01	0.01	0.37	-0.01	0.01	0.35	-0.01	0.01	0.38	-0.01	0.01	0.3	-0.01	0.01	0.042	-0.01	0.01	0.16	-0.01	0.01	0.15	-0.01	0.01	0.21	-0.01	0.01	0.15	0.00054	3.5e-05	-0.3	0.45	0.5	0.27	0.26	0.31	-0.55	0.55	0.32
Peptide	Dipeptide	Threonylphenylalanine	31530	4099799		HMDB29068	LC/MS Neg	2322	265.119	3.2514	1	0.04	0.02	0.045	0.01	0.02	0.43	0.01	0.03	0.82	0	0.02	0.89	0.01	0.01	0.18	0.03	0.02	0.1	0.01	0.01	0.68	0.02	0.01	0.073	0	0.02	0.9	0.00013	4.9e-06	0.5	0.8	0.53	0.23	0.52	0.66	2.24	1.12	0.047
Peptide	Dipeptide	Valylglycine	40475	136487		HMDB29127	LC/MS Neg	1506	173.093	47.1848	1	0	0.02	0.94	0.02	0.02	0.13	0.01	0.03	0.74	-0.02	0.02	0.49	0.01	0.01	0.6	0.01	0.02	0.69	0.01	0.01	0.58	0.01	0.01	0.27	-0.01	0.02	0.67	4.1e-05	0.00032	-0.48	0.71	0.5	0.37	0.43	0.39	-0.74	1.4	0.6
Peptide	Fibrinogen Cleavage Peptide	Fibrinopeptide A (2-15)**	46692				LC/MS Neg	2187	653.268	0	3	0.02	0.03	0.37	0	0.02	1	-0.02	0.04	0.59	-0.04	0.03	0.2	-0.01	0.02	0.58	0.01	0.02	0.68	-0.02	0.02	0.42	0.01	0.02	0.58	-0.04	0.03	0.13	5.2e-05	7.5e-07	-1.07	0.98	0.28	0.56	0.71	0.43	0.8	1.79	0.65
Peptide	Fibrinogen Cleavage Peptide	Fibrinopeptide A (3-15)**	46698				LC/MS Neg	2480	595.753	0	3	0.02	0.02	0.37	0.02	0.02	0.13	0	0.04	0.94	-0.02	0.03	0.54	0.01	0.01	0.41	0.01	0.02	0.53	0.01	0.01	0.42	0.02	0.01	0.091	-0.02	0.02	0.43	1.4e-05	3.1e-06	-0.65	0.86	0.45	0.28	0.47	0.56	0.47	1.56	0.76
Peptide	Fibrinogen Cleavage Peptide	Fibrinopeptide A (3-16)**	46693				LC/MS Neg	2842	673.808	0	3	0.03	0.03	0.3	0.06	0.03	0.053	0	0.07	0.97	-0.05	0.04	0.26	0.02	0.02	0.3	0.03	0.03	0.38	0.02	0.03	0.45	0.05	0.02	0.031	-0.05	0.04	0.21	5.3e-06	3.9e-07	-1.16	1.29	0.37	0.92	0.86	0.28	0.4	2.77	0.89
Peptide	Fibrinogen Cleavage Peptide	Fibrinopeptide A (4-15)**	46668				LC/MS Neg	2624	552.236	0.3172	3	0.03	0.02	0.13	0	0.02	0.85	0	0.04	0.95	0	0.02	0.91	0	0.01	0.68	0.02	0.02	0.23	0	0.01	0.94	0.01	0.01	0.5	-0.01	0.02	0.75	0.00012	7.6e-07	-0.66	0.66	0.32	-0.3	0.48	0.53	-0.61	1.34	0.65
Peptide	Fibrinogen Cleavage Peptide	Fibrinopeptide A (5-16)*	46697				LC/MS Neg	2892	601.777	0	2	0.01	0.05	0.85	-0.03	0.04	0.55	-0.18	0.07	0.0081	-0.05	0.06	0.38	-0.05	0.03	0.076	-0.06	0.04	0.087	-0.03	0.03	0.34	-0.01	0.03	0.87	-0.11	0.04	0.014	4.3e-06	4.2e-07	-3.88	1.65	0.019	0.99	1.2	0.41	-4.17	2.84	0.14
Peptide	Fibrinogen Cleavage Peptide	Fibrinopeptide A (7-16)*	46699				LC/MS Neg	3308	508.744	0	2	-0.03	0.03	0.42	-0.06	0.03	0.013	-0.13	0.04	0.0016	-0.02	0.04	0.57	-0.06	0.02	0.00053	-0.07	0.02	0.0023	-0.05	0.02	0.031	-0.05	0.02	0.021	-0.07	0.03	0.011	3.7e-06	2.4e-07	-2.42	1.15	0.036	-0.5	0.74	0.5	-3.06	1.73	0.08
Peptide	Fibrinogen Cleavage Peptide	Fibrinopeptide A*	33084	16133137			LC/MS Pos Early	3350	768.85	14.7502	2	0	0.02	0.93	0	0.01	0.87	0	0.03	0.97	-0.05	0.02	0.027	-0.01	0.01	0.14	0	0.01	0.86	-0.01	0.01	0.2	0	0.01	0.73	-0.04	0.02	0.037	0.0005	0.00019	-0.71	0.57	0.21	-0.26	0.27	0.34	-0.44	1.16	0.7
Peptide	Fibrinogen Cleavage Peptide	Fibrinopeptide A, des-ala(1)*	31548				LC/MS Neg	2535	731.317	0	2	-0.02	0.04	0.59	0.03	0.04	0.35	-0.05	0.07	0.45	-0.08	0.05	0.1	-0.02	0.02	0.39	-0.03	0.04	0.43	-0.01	0.03	0.7	0.01	0.03	0.61	-0.08	0.04	0.048	5.9e-06	2.7e-07	-3.08	1.58	0.053	2.44	1.04	0.02	-1.31	2.65	0.62
Peptide	Fibrinogen Cleavage Peptide	Fibrinopeptide A, phosphono-ser(3)*	57712				LC/MS Neg	2016	806.818	0.0793	2	-0.03	0.02	0.23	0.02	0.02	0.38	-0.02	0.04	0.57	-0.07	0.02	0.0058	-0.02	0.01	0.12	-0.02	0.02	0.3	-0.02	0.01	0.24	0	0.01	0.85	-0.05	0.02	0.006	1.1e-05	4.4e-05	-0.5	0.75	0.5	0.29	0.52	0.58	-0.75	1.47	0.61
Peptide	Fibrinogen Cleavage Peptide	Fibrinopeptide B (1-11)**	46412				LC/MS Neg	2399	411.49	0	3	0.01	0.02	0.51	0.04	0.02	0.11	0.01	0.04	0.82	0.03	0.03	0.31	0.02	0.01	0.081	0.01	0.02	0.66	0.03	0.02	0.079	0.03	0.02	0.083	0.02	0.02	0.35	1.8e-06	9e-08	-0.89	0.78	0.26	1.19	0.63	0.059	-3.35	1.58	0.035
Peptide	Fibrinogen Cleavage Peptide	Fibrinopeptide B (1-12)**	46406				LC/MS Neg	2380.2	661.255	0.0793	3	-0.01	0.02	0.6	0.03	0.02	0.17	0.01	0.03	0.71	0.02	0.03	0.56	0.01	0.01	0.36	-0.01	0.02	0.77	0.02	0.02	0.22	0.01	0.02	0.41	0.01	0.02	0.52	2.4e-06	1.9e-07	-0.7	0.87	0.42	0.86	0.59	0.14	-3.46	1.41	0.016
Peptide	Fibrinogen Cleavage Peptide	Fibrinopeptide B (1-13)**	46694				LC/MS Neg	2533	696.777	0	3	-0.01	0.04	0.79	-0.02	0.03	0.59	-0.1	0.06	0.093	-0.12	0.05	0.012	-0.05	0.02	0.013	-0.04	0.03	0.23	-0.05	0.03	0.055	-0.02	0.03	0.51	-0.12	0.04	0.0011	2e-05	2.3e-06	-3.13	1.44	0.031	-0.27	0.96	0.78	0.27	2.32	0.91
Peptide	Fibrinogen Cleavage Peptide	Fibrinopeptide B (1-9)**	46644				LC/MS Pos Early	1639	472.684	5.8684	3	-0.02	0.02	0.2	-0.01	0.01	0.49	-0.01	0.02	0.39	-0.02	0.01	0.12	-0.01	0.01	0.025	-0.02	0.01	0.16	-0.01	0.01	0.096	-0.01	0.01	0.25	-0.02	0.01	0.058	6.8e-05	4.7e-05	-0.1	0.65	0.88	0.25	0.28	0.37	1.02	0.89	0.25
Peptide	Gamma-glutamyl Amino Acid	Gamma-glutamyl-2-aminobutyrate	37092				LC/MS Pos Early	2380	233.113	1.8239	1	0.04	0.02	0.098	0.06	0.02	0.00043	0.03	0.03	0.37	0.06	0.02	0.0094	0.05	0.01	3.7e-06	0.03	0.02	0.093	0.06	0.01	2.9e-05	0.05	0.01	0.00011	0.05	0.02	0.0049	9.8e-06	3.7e-05	0.69	0.95	0.47	1.46	0.5	0.0039	0.4	1.44	0.78
Peptide	Gamma-glutamyl Amino Acid	Gamma-glutamylalanine	37063	440103		HMDB29142	LC/MS Pos Early	1986	219.098	0.2379	1	0.03	0.03	0.34	-0.06	0.02	0.0022	0.07	0.05	0.13	-0.03	0.03	0.3	-0.03	0.01	0.028	0.03	0.03	0.2	-0.05	0.02	0.0022	-0.04	0.02	0.018	-0.01	0.03	0.82	0.00012	5.1e-09	1.93	1.21	0.11	0.24	0.58	0.68	1.15	1.97	0.56
Peptide	Gamma-glutamyl Amino Acid	Gamma-glutamyl-alpha-lysine	55015	65254			LC/MS Pos Early	2784	276.155	0	1	-0.02	0.05	0.7	-0.05	0.04	0.26	0.05	0.08	0.56	-0.04	0.06	0.54	-0.02	0.03	0.39	0.01	0.04	0.78	-0.05	0.04	0.2	-0.04	0.03	0.26	0	0.05	0.96	5.3e-06	5e-09	2.37	1.82	0.19	3.74	1.24	0.0028	-2.74	3.38	0.42
Peptide	Gamma-glutamyl Amino Acid	Gamma-glutamylcitrulline*	52766				LC/MS Pos Early	1678	305.145	0.1586	2	0	0.04	0.98	0.03	0.03	0.24	0.03	0.03	0.46	-0.02	0.04	0.62	0.01	0.02	0.63	0.02	0.03	0.5	0.01	0.02	0.78	0.02	0.02	0.37	0	0.03	0.85	4.3e-06	8.8e-07	-0.53	1.48	0.72	0.36	0.77	0.64	-1.23	1.44	0.39
Peptide	Gamma-glutamyl Amino Acid	Gamma-glutamyl-epsilon-lysine	33934	7015685		HMDB03869	LC/MS Pos Early	2717	276.155	0.0793	1	-0.03	0.04	0.52	-0.06	0.03	0.022	-0.01	0.05	0.85	-0.02	0.03	0.54	-0.03	0.02	0.067	-0.01	0.03	0.68	-0.04	0.02	0.047	-0.05	0.02	0.02	-0.01	0.03	0.73	2.4e-06	2.3e-09	1.81	1.61	0.26	0.47	0.8	0.56	0.06	2.35	0.98
Peptide	Gamma-glutamyl Amino Acid	Gamma-glutamylglutamate	36738	92865	C05282	HMDB11737	LC/MS Pos Early	1775	277.103	6.027	1	0	0.02	0.88	-0.03	0.02	0.15	-0.02	0.03	0.61	-0.02	0.02	0.4	-0.01	0.01	0.24	0.01	0.02	0.77	-0.02	0.01	0.13	-0.02	0.01	0.18	-0.01	0.02	0.44	0.00043	6.2e-08	-0.69	0.93	0.45	-0.55	0.53	0.3	-0.9	1.36	0.51
Peptide	Gamma-glutamyl Amino Acid	Gamma-glutamylglutamine	2730	150914	C05283	HMDB11738	LC/MS Pos Early	1430	276.119	0	1	0.06	0.06	0.35	-0.02	0.05	0.66	0.06	0.08	0.41	0.01	0.06	0.85	0.01	0.03	0.66	0.06	0.05	0.23	-0.02	0.04	0.67	0.01	0.04	0.84	0.04	0.05	0.35	8.9e-06	3.3e-08	3.5	2.27	0.12	1.93	1.28	0.13	0.18	3.16	0.95
Peptide	Gamma-glutamyl Amino Acid	Gamma-glutamylglycine	33949	165527		HMDB11667	LC/MS Pos Early	1535	205.082	0	1	-0.03	0.03	0.27	-0.02	0.02	0.36	-0.06	0.05	0.22	-0.07	0.05	0.12	-0.03	0.02	0.03	-0.05	0.03	0.064	-0.03	0.02	0.12	-0.02	0.02	0.22	-0.07	0.03	0.061	1e-06	2.2e-05	-0.36	1.1	0.74	-0.34	0.57	0.55	-2.67	2.15	0.22
Peptide	Gamma-glutamyl Amino Acid	Gamma-glutamylhistidine	18245	7017195			LC/MS Pos Early	2740	285.119	0	1	0.04	0.06	0.55	-0.12	0.05	0.0097	0.04	0.09	0.67	-0.04	0.04	0.34	-0.04	0.03	0.096	0.04	0.05	0.43	-0.07	0.03	0.02	-0.07	0.04	0.048	-0.02	0.04	0.69	4.2e-06	2.7e-09	4.24	2.14	0.049	1.57	1.31	0.23	-1.95	3.64	0.59
Peptide	Gamma-glutamyl Amino Acid	Gamma-glutamylisoleucine*	34456	14253342		HMDB11170	LC/MS Pos Early	2940	261.144	0	2	-0.06	0.04	0.099	-0.09	0.03	0.0024	-0.02	0.04	0.66	-0.07	0.03	0.029	-0.07	0.02	0.00013	-0.03	0.03	0.23	-0.08	0.02	0.00033	-0.08	0.02	0.00029	-0.06	0.03	0.038	3e-05	1.8e-11	-2.31	1.32	0.083	-1.28	0.82	0.12	-0.34	1.85	0.85
Peptide	Gamma-glutamyl Amino Acid	Gamma-glutamylleucine	18369	151023		HMDB11171	LC/MS Pos Early	2991	261.144	0	1	-0.01	0.05	0.86	-0.07	0.04	0.079	0.03	0.06	0.58	0	0.04	0.95	-0.02	0.02	0.4	0.02	0.04	0.58	-0.04	0.03	0.22	-0.05	0.03	0.088	0.01	0.03	0.73	1.1e-05	5.8e-09	-1.16	1.69	0.49	1.64	1.12	0.14	1	2.47	0.69
Peptide	Gamma-glutamyl Amino Acid	Gamma-glutamylmethionine	44872	7009567		HMDB29155	LC/MS Pos Early	2640	279.101	0	1	0.01	0.04	0.75	-0.05	0.04	0.2	-0.02	0.04	0.54	-0.06	0.04	0.098	-0.04	0.02	0.029	-0.01	0.03	0.62	-0.06	0.03	0.021	-0.02	0.03	0.42	-0.05	0.03	0.095	2.2e-05	2.7e-08	0.5	1.38	0.72	2.74	0.96	0.0044	-2.27	1.36	0.098
Peptide	Gamma-glutamyl Amino Acid	Gamma-glutamylphenylalanine	33422	111299		HMDB00594	LC/MS Neg	1825	293.114	0	1	-0.1	0.05	0.075	-0.16	0.05	0.00074	-0.11	0.06	0.068	-0.11	0.04	0.013	-0.12	0.02	5.5e-07	-0.09	0.04	0.014	-0.13	0.03	3e-05	-0.14	0.03	0.00011	-0.11	0.03	0.0014	2.2e-07	2.3e-12	-0.69	1.93	0.72	1.23	1.24	0.32	-4.79	2.42	0.049
Peptide	Gamma-glutamyl Amino Acid	Gamma-glutamylthreonine	33364	76078708		HMDB29159	LC/MS Pos Early	1750	249.108	0	1	0.01	0.03	0.85	-0.05	0.03	0.057	0.02	0.06	0.69	-0.08	0.04	0.048	-0.04	0.02	0.015	0.01	0.03	0.86	-0.06	0.02	0.0045	-0.03	0.02	0.12	-0.05	0.03	0.11	4.4e-05	1.3e-07	1.51	1.3	0.25	1.85	0.74	0.013	-2.74	2.36	0.25
Peptide	Gamma-glutamyl Amino Acid	Gamma-glutamyltryptophan	33947	3989307		HMDB29160	LC/MS Neg	1960	332.125	4.0444	1	0.04	0.03	0.26	0	0.03	0.88	-0.08	0.05	0.084	0	0.03	0.98	0	0.02	0.79	0	0.03	0.93	0	0.02	0.97	0.01	0.02	0.56	-0.02	0.03	0.47	3.6e-06	2.9e-07	-0.23	1.21	0.85	2.3	0.74	0.002	-2.69	1.83	0.14
Peptide	Gamma-glutamyl Amino Acid	Gamma-glutamyltyrosine	2734	94340		HMDB11741	LC/MS Neg	1240	309.109	0	1	-0.01	0.04	0.8	-0.06	0.03	0.083	-0.07	0.05	0.17	-0.09	0.03	0.013	-0.06	0.02	0.0007	-0.04	0.03	0.27	-0.08	0.02	0.0013	-0.04	0.03	0.1	-0.08	0.03	0.0057	4.7e-06	5.9e-09	0.34	1.54	0.83	1.85	0.89	0.037	-2.19	2.09	0.3
Peptide	Gamma-glutamyl Amino Acid	Gamma-glutamylvaline	43829	7015683		HMDB11172	LC/MS Pos Early	2700	247.129	0	1	-0.08	0.05	0.098	-0.09	0.03	0.0064	0.02	0.06	0.66	-0.05	0.04	0.26	-0.06	0.02	0.0068	-0.02	0.03	0.66	-0.07	0.03	0.006	-0.09	0.03	0.00088	-0.02	0.03	0.56	1.7e-05	4.4e-11	-3.42	1.69	0.045	-0.55	0.92	0.55	-0.52	2.52	0.84
Peptide	Modified Peptides	Pyroglutamylisoleucine*	47226				LC/MS Neg	2211	241.12	89.9286	2	.	.	.	.	.	.	.	.	.	.	.	.	.	.	.	.	.	.	.	.	.	.	.	.	.	.	.	.	.	.	.	.	.	.	.	.	.	.
Peptide	Modified Peptides	Pyroglutamylleucine*	47225				LC/MS Neg	2273	241.12	4.203	2	-0.01	0.03	0.69	-0.06	0.03	0.023	-0.03	0.03	0.33	-0.1	0.03	0.00055	-0.05	0.01	0.00014	-0.02	0.02	0.31	-0.08	0.02	3.5e-05	-0.04	0.02	0.041	-0.07	0.02	0.00091	0.00086	1.9e-07	-1.02	1.18	0.39	0.48	0.78	0.54	-0.77	1.23	0.53
Peptide	Modified Peptides	Pyroglutamylphenylalanine	46463				LC/MS Neg	2590	275.104	16.4948	1	0.03	0.02	0.14	-0.03	0.02	0.14	-0.01	0.03	0.67	-0.03	0.03	0.19	-0.02	0.01	0.15	0.01	0.02	0.56	-0.03	0.01	0.042	-0.01	0.01	0.63	-0.03	0.02	0.16	0.0014	4.2e-06	-0.66	0.8	0.41	0.69	0.5	0.17	-0.77	1.39	0.58
Peptide	Modified Peptides	Pyroglutamylthreonine*	47212				LC/MS Neg	1021	229.083	3.9651	2	0.01	0.03	0.73	0	0.02	0.99	-0.03	0.04	0.41	-0.03	0.03	0.33	-0.01	0.01	0.43	0	0.02	0.85	-0.01	0.02	0.5	0	0.01	0.93	-0.03	0.02	0.19	3.2e-05	1.4e-06	-0.11	0.96	0.91	0.58	0.53	0.27	0.82	1.64	0.62
Peptide	Polypeptide	Bradykinin, des-arg(9)	34420	105044	C00306	HMDB04246	LC/MS Neg	4250	902.453	51.7843	1	0.03	0.01	0.023	0.01	0.01	0.22	0.02	0.02	0.49	-0.02	0.02	0.14	0.01	0.01	0.31	0.03	0.01	0.021	0	0.01	0.95	0.02	0.01	0.029	-0.01	0.01	0.31	0.00071	1.3e-05	-0.26	0.55	0.64	0.21	0.32	0.5	-0.1	0.93	0.92
Peptide	Polypeptide	Glu-gly-asn-val**	46509				LC/MS Pos Early	2655	418.193	2.9342	3	-0.01	0.02	0.74	-0.02	0.01	0.082	0	0.01	0.56	-0.02	0.01	0.18	-0.01	0	0.022	-0.01	0.01	0.27	-0.02	0.01	0.021	-0.01	0.01	0.097	-0.01	0.01	0.17	0.026	2.6e-06	-0.12	0.56	0.83	-0.26	0.32	0.42	0.25	0.27	0.35
Peptide	Polypeptide	HWESASXX*	57711				LC/MS Neg	3722	940.453	3.2514	2	0.01	0.01	0.7	0.01	0.01	0.66	0.01	0.02	0.77	0	0.01	0.87	0	0.01	0.65	0	0.01	0.82	0	0.01	0.78	0.01	0.01	0.5	0	0.01	0.8	0.00023	0.00012	-1.14	0.48	0.018	-0.04	0.28	0.88	-0.55	0.76	0.47
Xenobiotic	Benzoate Metabolism	2,6-dihydroxybenzoic acid	46355				LC/MS Neg	2580.5	153.02	0	1	0.02	0.01	0.13	-0.01	0.01	0.11	-0.01	0.02	0.5	0.01	0.01	0.57	0	0.01	0.68	0	0.01	0.74	0	0.01	0.47	-0.01	0.01	0.45	0	0.01	0.79	0.00043	3.3e-06	-0.7	0.51	0.17	-0.08	0.23	0.73	0.5	0.75	0.51
Xenobiotic	Benzoate Metabolism	3-hydroxyhippurate sulfate	52332				LC/MS Neg	1142	274.002	60.111	1	0.01	0.02	0.53	0	0.01	0.74	0.02	0.02	0.5	-0.03	0.02	0.044	0	0.01	0.54	0.02	0.01	0.18	-0.01	0.01	0.14	0	0.01	0.98	-0.02	0.01	0.24	0.00041	2e-06	0.4	0.64	0.53	-0.23	0.32	0.47	0.88	1	0.38
Xenobiotic	Chemical	PEG-glucuronide, fragment 03*	46315				LC/MS Neg	1484	309.119	83.9017	2	.	.	.	.	.	.	.	.	.	.	.	.	.	.	.	.	.	.	.	.	.	.	.	.	.	.	.	.	.	.	.	.	.	.	.	.	.	.
Xenobiotic	Chemical	PEG-glycoside, fragment 03*	52880				LC/MS Neg	2084	295.14	77.3196	2	-0.01	0.02	0.8	-0.01	0.01	0.62	0.04	0.03	0.21	0.03	0.02	0.15	0.01	0.01	0.43	0.01	0.02	0.47	0	0.01	0.66	-0.01	0.01	0.57	0.03	0.02	0.049	2.5e-05	6.7e-10	-0.07	0.71	0.93	-0.31	0.35	0.38	-0.28	1.33	0.83
Xenobiotic	Chemical	PEG-glycoside, fragment 05*	52873				LC/MS Neg	2531	383.193	40.9199	2	0	0	0.62	0	0	0.32	0	0	0.91	0	0	0.45	0	0	0.58	0	0	0.52	0	0	0.6	0	0	0.64	0	0	0.53	0.85	0.12	0	0.01	0.79	-0.01	0.01	0.24	0	0.01	0.87
Xenobiotic	Chemical	PEG-glycoside, fragment 07*	52871				LC/MS Neg	2870	471.245	57.6527	2	-0.01	0.02	0.65	0	0.01	0.9	0.02	0.02	0.36	0.02	0.02	0.28	0.01	0.01	0.33	0	0.01	0.77	0.01	0.01	0.36	0	0.01	0.89	0.02	0.01	0.16	9.9e-06	4.4e-09	0.1	0.59	0.87	0	0.31	0.99	0.78	1.04	0.45
Xenobiotic	Chemical	PEG-glycoside, fragment 09*	47836				LC/MS Pos Early	2638	578.338	91.594	2	.	.	.	.	.	.	.	.	.	.	.	.	.	.	.	.	.	.	.	.	.	.	.	.	.	.	.	.	.	.	.	.	.	.	.	.	.	.
Xenobiotic	Drug – Analgesics, Anaesthetics	3-(methylthio)acetaminophen sulfate*	46982				LC/MS Neg	2285	276.002	74.8612	2	0	0.02	0.99	-0.01	0.01	0.32	-0.01	0.03	0.75	-0.02	0.02	0.27	-0.01	0.01	0.13	-0.01	0.02	0.49	-0.01	0.01	0.17	-0.01	0.01	0.39	-0.02	0.02	0.31	2.5e-05	2.1e-06	0.49	0.65	0.45	-0.11	0.36	0.75	0.01	1.34	0.99
Xenobiotic	Food Component/Plant	(2,4 or 2,5)-dimethylphenol sulfate	48989				LC/MS Neg	3478	201.023	5.1546	1	0	0.01	0.87	-0.02	0	0.00023	0.01	0	0.19	0	0	0.4	0	0	0.096	0	0	0.28	-0.01	0	0.0045	-0.01	0	0.0036	0	0	0.86	0.58	3.5e-06	0.04	0.15	0.77	-0.09	0.12	0.48	0.12	0.2	0.54
Xenobiotic	Food Component/Plant	Dihydrocaffeate sulfate (2)	47393				LC/MS Neg	971	261.008	68.1205	1	0.03	0.02	0.13	-0.03	0.01	0.024	-0.01	0.02	0.62	-0.04	0.02	0.02	-0.02	0.01	0.011	0.01	0.01	0.68	-0.03	0.01	0.0014	-0.01	0.01	0.29	-0.03	0.01	0.022	0.0014	7.9e-07	0.38	0.62	0.54	-0.27	0.36	0.45	-0.05	1	0.96
Xenobiotic	Food Component/Plant	Glucuronide of piperine metabolite C17H21NO3 (4)*	46459				LC/MS Neg	3991	462.177	1.0309	2	0.01	0.01	0.44	0.01	0.01	0.14	0	0.01	0.71	-0.01	0.01	0.16	0	0.01	0.89	0.01	0.01	0.37	0	0.01	0.71	0.01	0.01	0.1	-0.01	0.01	0.34	0.0016	0.0028	-0.27	0.44	0.54	0.14	0.27	0.62	0.35	0.49	0.47
Xenobiotic	Food Component/Plant	Resveratrol disulfate (1)*	61736				LC/MS Neg	2471.1	386.985	98.5726	2	.	.	.	.	.	.	.	.	.	.	.	.	.	.	.	.	.	.	.	.	.	.	.	.	.	.	.	.	.	.	.	.	.	.	.	.	.	.
Xenobiotic	Food Component/Plant	Resveratrol disulfate (2)*	61735				LC/MS Neg	2775.5	386.985	99.1277	2	.	.	.	.	.	.	.	.	.	.	.	.	.	.	.	.	.	.	.	.	.	.	.	.	.	.	.	.	.	.	.	.	.	.	.	.	.	.
Xenobiotic	Food Component/Plant	Resveratrol sulfate (1)*	61734				LC/MS Neg	3192.3	307.028	98.5726	2	.	.	.	.	.	.	.	.	.	.	.	.	.	.	.	.	.	.	.	.	.	.	.	.	.	.	.	.	.	.	.	.	.	.	.	.	.	.
Xenobiotic	Food Component/Plant	Resveratrol sulfate (2)*	61733				LC/MS Neg	3608.2	307.03	97.7795	2	.	.	.	.	.	.	.	.	.	.	.	.	.	.	.	.	.	.	.	.	.	.	.	.	.	.	.	.	.	.	.	.	.	.	.	.	.	.
Xenobiotic	Food Component/Plant	Sulfate of piperine metabolite C16H19NO3 (2)*	46600				LC/MS Neg	4134	352.085	2.5377	2	0.02	0.01	0.12	0.02	0.01	0.1	0.01	0.01	0.39	-0.01	0.01	0.25	0.01	0.01	0.35	0.01	0.01	0.11	0	0.01	0.95	0.02	0.01	0.029	0	0.01	0.83	0.0029	0.0049	0.13	0.53	0.8	0.09	0.34	0.79	0.61	0.42	0.15
Xenobiotic	Food Component/Plant	Sulfate of piperine metabolite C16H19NO3 (3)*	47656				LC/MS Neg	4203	352.087	3.4893	2	0.03	0.01	0.07	0.02	0.01	0.12	0.01	0.01	0.42	-0.01	0.01	0.28	0.01	0.01	0.33	0.01	0.01	0.12	0	0.01	0.99	0.02	0.01	0.024	0	0.01	0.88	0.0035	0.0086	0.14	0.53	0.79	0.09	0.33	0.79	0.54	0.36	0.14
Xenobiotic	Food Component/Plant	Sulfate of piperine metabolite C18H21NO3 (1)*	47901				LC/MS Neg	4485	378.103	14.5123	2	0.04	0.01	0.0018	0.02	0.01	0.062	0	0.01	0.97	0.01	0.01	0.62	0.01	0.01	0.034	0.01	0.01	0.092	0.01	0.01	0.16	0.03	0.01	0.001	0	0.01	0.7	0.00049	0.048	0.06	0.48	0.9	0.45	0.32	0.16	0.59	0.52	0.26
Xenobiotics	Bacterial/Fungal	1H-indole-7-acetic acid	57783				LC/MS Polar	922	174.056	46.0745	1	-0.05	0.02	0.0069	0.01	0.01	0.38	0.01	0.03	0.79	-0.01	0.02	0.75	0	0.01	0.69	-0.02	0.01	0.2	0	0.01	0.8	-0.01	0.01	0.33	0	0.02	0.82	4.5e-05	1.5e-05	-0.66	0.64	0.3	-0.03	0.42	0.94	0.19	1.12	0.87
Xenobiotics	Bacterial/Fungal	N-methylpipecolate	47101	11286529			LC/MS Pos Early	1932	144.102	5.2339	1	-0.02	0.02	0.18	-0.01	0.01	0.46	-0.02	0.01	0.074	-0.01	0.01	0.11	-0.01	0	0.021	-0.02	0.01	0.011	-0.01	0	0.18	-0.01	0.01	0.27	-0.01	0.01	0.02	2.7e-05	0.00025	-0.49	0.65	0.45	-0.19	0.19	0.32	-0.87	0.42	0.04
Xenobiotics	Bacterial/Fungal	Tartronate (hydroxymalonate)	20693	45	C02287	HMDB35227	LC/MS Neg	610	118.999	0.3965	1	0.06	0.02	0.016	0.09	0.02	2.4e-08	0	0.04	0.95	0.06	0.02	0.014	0.07	0.01	5.5e-10	0.04	0.02	0.077	0.08	0.01	1.1e-08	0.08	0.01	4.2e-10	0.05	0.02	0.02	1e-08	4.4e-07	-0.23	0.93	0.8	0.66	0.49	0.18	-1.56	1.7	0.36
Xenobiotics	Benzoate Metabolism	2-ethylphenylsulfate	36847				LC/MS Neg	3416	201.023	58.4457	1	-0.02	0.02	0.3	-0.06	0.02	0.00042	-0.01	0.03	0.56	-0.05	0.02	0.027	-0.04	0.01	2.6e-05	-0.02	0.02	0.18	-0.05	0.01	4.2e-05	-0.04	0.01	0.00043	-0.04	0.02	0.027	0.00029	3.2e-08	-1.23	0.76	0.11	0.1	0.45	0.82	0.06	1.05	0.95
Xenobiotics	Benzoate Metabolism	2-hydroxyhippurate (salicylurate)	18281	10253	C07588	HMDB00840	LC/MS Neg	2184	194.046	9.3577	1	0	0	0.54	0	0	0.0004	0	0	0.19	0	0	0.74	0	0	0.0048	0	0	0.18	0	0	0.0082	0	0	0.003	0	0	0.34	0.87	0.08	0	0	0.36	-0.01	0	0.12	0	0.01	0.88
Xenobiotics	Benzoate Metabolism	3-(2-hydroxyphenyl)propionate	35634	873	C01198	HMDB33752	LC/MS Neg	2530	165.056	5.7891	1	0.06	0.03	0.064	0.03	0.03	0.34	0.08	0.04	0.074	0.02	0.03	0.5	0.03	0.02	0.027	0.07	0.03	0.013	0.02	0.02	0.21	0.04	0.02	0.069	0.03	0.02	0.2	8.3e-05	2.9e-06	-1.05	1.29	0.42	-0.45	0.77	0.56	4.15	1.8	0.023
Xenobiotics	Benzoate Metabolism	3-(3-hydroxyphenyl)propionate	35635	91	C11457	HMDB00375	LC/MS Neg	1980	165.056	18.2395	1	0.01	0.01	0.3	0	0	0.36	0.01	0.01	0.36	-0.01	0.01	0.24	0	0	0.64	0.01	0.01	0.22	0	0	0.94	0	0	0.21	0	0	0.65	0.12	0.031	-0.14	0.53	0.8	0.03	0.12	0.8	0.3	0.3	0.32
Xenobiotics	Benzoate Metabolism	3-(3-hydroxyphenyl)propionate sulfate	45415	187488			LC/MS Neg	1294	245.013	55.115	1	-0.01	0.02	0.72	0.01	0.01	0.28	0.03	0.02	0.21	-0.02	0.02	0.29	0	0.01	0.69	0.01	0.01	0.39	0	0.01	1	0.01	0.01	0.5	0	0.01	0.83	2.9e-05	1.3e-06	-0.5	0.6	0.41	-0.07	0.32	0.84	0.29	0.97	0.77
Xenobiotics	Benzoate Metabolism	3-(4-hydroxyphenyl)propionate	39587	10394	C01744	HMDB02199	LC/MS Neg	1670	165.056	71.5305	1	0.01	0.02	0.63	0.01	0.01	0.3	0	0.02	0.99	0.01	0.02	0.43	0.01	0.01	0.15	0.01	0.01	0.66	0.01	0.01	0.16	0.01	0.01	0.26	0.01	0.01	0.49	1.3e-05	2.2e-07	0.27	0.7	0.7	-0.41	0.35	0.25	-0.8	1.01	0.43
Xenobiotics	Benzoate Metabolism	3-ethylphenylsulfate	36848		C14386		LC/MS Neg	3530	201.023	81.9984	1	.	.	.	.	.	.	.	.	.	.	.	.	.	.	.	.	.	.	.	.	.	.	.	.	.	.	.	.	.	.	.	.	.	.	.	.	.	.
Xenobiotics	Benzoate Metabolism	3-hydroxyhippurate	39600	450268		HMDB06116	LC/MS Neg	1687	194.046	2.2998	1	0	0.01	0.75	0	0	0.8	0	0	0.36	-0.01	0	0.15	0	0	0.91	0.01	0	0.17	0	0	0.49	0	0	0.7	0	0	0.69	0.39	0.0052	-0.26	0.45	0.57	0	0.09	0.98	0.15	0.19	0.42
Xenobiotics	Benzoate Metabolism	3-methoxycatechol sulfate (1)	48763				LC/MS Neg	2163	218.997	7.613	1	0	0	0.26	0	0	0.67	0	0	0.6	0.01	0	0.042	0	0	0.41	0	0	0.71	0	0	0.24	0	0	0.34	0.01	0	0.044	0.0022	9.4e-07	-0.12	0.13	0.34	-0.04	0.06	0.49	0.09	0.2	0.64
Xenobiotics	Benzoate Metabolism	3-methyl catechol sulfate (1)	46165				LC/MS Neg	2790	203.002	4.0444	1	0	0.01	0.96	-0.01	0	0.031	0	0.01	0.83	-0.01	0	0.19	0	0	0.043	0	0	0.84	-0.01	0	0.02	-0.01	0	0.041	0	0	0.37	0.075	6.9e-05	-0.03	0.13	0.82	0.01	0.12	0.92	0.06	0.26	0.82
Xenobiotics	Benzoate Metabolism	3-methyl catechol sulfate (2)	46164				LC/MS Neg	2860	203.002	73.9889	1	-0.01	0.02	0.72	-0.04	0.02	0.0097	0.03	0.02	0.19	-0.02	0.02	0.43	-0.01	0.01	0.16	0.02	0.02	0.32	-0.03	0.01	0.024	-0.03	0.01	0.014	0	0.02	0.8	0.00055	4.3e-09	0.28	0.94	0.77	0.15	0.47	0.74	0.54	1.04	0.6
Xenobiotics	Benzoate Metabolism	3-phenylpropionate (hydrocinnamate)	15749	107	C05629	HMDB00764	LC/MS Neg	2860	149.061	3.0135	1	0.01	0.01	0.18	0.01	0.01	0.012	0.01	0.02	0.48	0	0.01	0.96	0.01	0	0.023	0.01	0.01	0.091	0.01	0	0.11	0.01	0	0.0033	0	0.01	0.66	0.0023	0.033	0.03	0.38	0.93	0.1	0.15	0.5	0.31	0.63	0.63
Xenobiotics	Benzoate Metabolism	4-ethylphenylsulfate	36099		C13637		LC/MS Neg	3580	201.023	0.2379	1	0	0.01	0.62	0	0	0.097	0.01	0	0.097	0	0	0.51	0	0	0.029	0	0	0.18	0	0	0.11	0	0	0.1	0	0	0.12	0.15	0.0032	-0.15	0.24	0.54	0.02	0.04	0.67	0.05	0.13	0.71
Xenobiotics	Benzoate Metabolism	4-hydroxybenzoate	21133	135	C00156	HMDB00500	LC/MS Neg	820	137.024	90.9596	1	.	.	.	.	.	.	.	.	.	.	.	.	.	.	.	.	.	.	.	.	.	.	.	.	.	.	.	.	.	.	.	.	.	.	.	.	.	.
Xenobiotics	Benzoate Metabolism	4-hydroxyhippurate	35527	151012		HMDB13678	LC/MS Neg	1475	194.046	2.4584	1	0	0.01	0.57	0	0.01	0.79	0	0	0.72	-0.01	0.01	0.02	0	0	0.83	0	0	0.3	-0.01	0	0.11	0	0	0.72	0	0	0.39	0.66	0.0043	0.36	0.3	0.23	-0.14	0.17	0.42	0.04	0.16	0.78
Xenobiotics	Benzoate Metabolism	4-methylcatechol sulfate	46146				LC/MS Neg	2665	203.002	0	1	-0.02	0.01	0.28	-0.01	0.01	0.17	0	0.02	0.85	-0.01	0.01	0.27	-0.01	0.01	0.13	-0.01	0.01	0.53	-0.01	0.01	0.13	-0.01	0.01	0.078	-0.01	0.01	0.39	0.0007	4.8e-06	-1.23	0.55	0.027	-0.05	0.23	0.82	0.95	0.64	0.14
Xenobiotics	Benzoate Metabolism	4-vinylphenol sulfate	36098	6426766	C05627	HMDB04072	LC/MS Neg	3320	199.007	0.1586	1	0	0.01	0.71	0	0	0.5	0	0.01	0.56	0	0.01	0.93	0	0	0.33	0	0.01	0.41	0	0	0.59	0	0	0.47	0	0	0.6	0.016	0.00063	0.03	0.26	0.92	-0.06	0.14	0.69	0.03	0.36	0.94
Xenobiotics	Benzoate Metabolism	Benzoate	15778	243	C00180	HMDB01870	LC/MS Neg	1750	121.029	0	1	0.02	0.04	0.56	0.02	0.03	0.47	-0.04	0.06	0.52	0.08	0.05	0.13	0.03	0.02	0.14	0.01	0.03	0.78	0.04	0.03	0.1	0.02	0.02	0.37	0.03	0.04	0.38	5.2e-07	1.2e-08	2.25	1.37	0.1	1.09	0.88	0.22	-0.32	2.37	0.89
Xenobiotics	Benzoate Metabolism	Catechol sulfate	35320	3083879		HMDB59724	LC/MS Neg	1906	188.986	0	1	0.02	0.01	0.14	0.01	0.01	0.13	0	0.01	0.89	-0.01	0.01	0.13	0	0	0.6	0.01	0.01	0.48	0	0.01	0.99	0.01	0.01	0.026	-0.01	0.01	0.2	0.0051	0.023	-0.14	0.43	0.74	0.14	0.23	0.55	-0.27	0.43	0.54
Xenobiotics	Benzoate Metabolism	Hippurate	15753	464	C01586	HMDB00714	LC/MS Neg	2106.9	178.051	0	1	0	0.01	0.78	0.01	0.01	0.32	0	0.01	0.77	-0.01	0.01	0.33	0	0	0.76	0	0	0.86	0	0.01	0.9	0	0	0.35	0	0.01	0.52	0.0048	0.0091	-0.14	0.23	0.55	0.09	0.18	0.63	0.21	0.29	0.47
Xenobiotics	Benzoate Metabolism	Methyl-4-hydroxybenzoate sulfate	48429				LC/MS Neg	2873	230.997	6.1063	1	0	0	0.22	0	0	0.74	0	0	0.063	0	0	0.67	0	0	0.47	0	0	0.022	0	0	0.81	0	0	0.86	0	0	0.096	0.75	0.00071	0.04	0.04	0.35	0	0.02	0.82	0.14	0.09	0.12
Xenobiotics	Benzoate Metabolism	O-cresol sulfate	36845	11615528			LC/MS Neg	2796	187.007	1.9033	1	0	0.01	0.82	-0.02	0.01	0.00015	0	0	0.46	-0.01	0.01	0.23	-0.01	0	0.03	0	0	0.74	-0.01	0	0.00082	-0.01	0	0.0025	0	0	0.79	0.68	4.5e-06	0.05	0.17	0.76	-0.22	0.15	0.13	-0.01	0.19	0.97
Xenobiotics	Benzoate Metabolism	O-methylcatechol sulfate	46111	22473		HMDB60013	LC/MS Neg	2344	203.002	0.1586	1	0	0.01	0.71	-0.01	0.01	0.33	0	0	0.32	-0.01	0.01	0.0059	-0.01	0	0.025	0	0	0.49	-0.01	0	0.0083	0	0.01	0.58	-0.01	0	0.012	0.37	0.0011	-0.21	0.37	0.58	-0.13	0.21	0.53	-0.22	0.19	0.23
Xenobiotics	Benzoate Metabolism	P-cresol sulfate	36103	4615423		HMDB11635	LC/MS Neg	2890	187.007	0	1	-0.03	0.02	0.12	-0.03	0.01	0.049	-0.03	0.02	0.067	-0.06	0.02	0.0068	-0.03	0.01	0.00019	-0.03	0.01	0.039	-0.04	0.01	0.0012	-0.03	0.01	0.0093	-0.04	0.01	0.0027	0.00015	4e-05	-1.42	0.8	0.079	-0.36	0.41	0.38	0.28	0.81	0.73
Xenobiotics	Benzoate Metabolism	Propyl 4-hydroxybenzoate sulfate	48460				LC/MS Neg	3971	259.028	47.4227	1	0	0	0.56	0	0	0.71	0	0	0.24	0.01	0.01	0.083	0	0	0.1	0	0	0.13	0	0	0.54	0	0	0.78	0	0	0.073	0.19	0.0071	0.06	0.06	0.37	-0.07	0.07	0.35	0.07	0.07	0.35
Xenobiotics	Chemical	1,2,3-benzenetriol sulfate (1)	48761				LC/MS Neg	1453	204.981	83.3466	1	.	.	.	.	.	.	.	.	.	.	.	.	.	.	.	.	.	.	.	.	.	.	.	.	.	.	.	.	.	.	.	.	.	.	.	.	.	.
Xenobiotics	Chemical	1,2,3-benzenetriol sulfate (2)	48762				LC/MS Neg	1709	204.981	21.4116	1	0	0	0.22	0	0	0.59	0	0	0.73	0	0	0.022	0	0	0.15	0	0	0.52	0	0	0.039	0	0	0.87	0	0	0.028	0.0019	4.8e-05	-0.05	0.07	0.47	-0.02	0.04	0.65	0.05	0.13	0.72
Xenobiotics	Chemical	2,2'-Methylenebis(6-tert-butyl-p-cresol)	48570				LC/MS Neg	6070	339.233	0.2379	1	.	.	.	.	.	.	.	.	.	.	.	.	.	.	.	.	.	.	.	.	.	.	.	.	.	.	.	.	.	.	.	.	.	.	.	.	.	.
Xenobiotics	Chemical	2-aminophenol sulfate	43266	181670		HMDB61116	LC/MS Neg	1677	188.002	1.1102	1	0	0	0.12	-0.01	0	0.026	0	0.01	0.45	0	0	0.85	0	0	0.31	0	0	0.44	0	0	0.11	0	0	0.39	0	0	0.55	0.25	0.0031	-0.23	0.12	0.055	-0.02	0.08	0.82	0.08	0.25	0.74
Xenobiotics	Chemical	2-methoxyresorcinol sulfate	48445				LC/MS Neg	1863	218.997	61.6971	1	-0.02	0.02	0.22	0	0.01	0.99	0.01	0.03	0.82	0	0.02	0.81	0	0.01	0.54	-0.01	0.01	0.44	0	0.01	0.85	0	0.01	0.62	0	0.01	0.74	4.6e-06	2.2e-07	-1.1	0.7	0.12	-0.24	0.32	0.46	-1.04	1.1	0.35
Xenobiotics	Chemical	2-naphthol sulfate	54873				LC/MS Neg	3672	223.007	4.5202	1	0.02	0.01	0.019	-0.01	0.01	0.085	0.01	0.01	0.077	0	0.01	0.66	0.01	0	0.11	0.01	0	0.0046	-0.01	0.01	0.37	0	0.01	0.85	0.01	0.01	0.079	0.17	6.3e-05	0.24	0.29	0.41	0.22	0.2	0.27	0.09	0.23	0.68
Xenobiotics	Chemical	3-acetylphenol sulfate	48693				LC/MS Neg	2477	215.002	59.7938	1	0.01	0.02	0.74	-0.02	0.01	0.068	0.02	0.02	0.51	-0.01	0.02	0.73	-0.01	0.01	0.43	0.01	0.02	0.37	-0.02	0.01	0.15	-0.02	0.01	0.17	0	0.01	0.83	0.0002	3.8e-08	0.56	0.79	0.48	0.24	0.38	0.52	0.29	1	0.77
Xenobiotics	Chemical	3-hydroxypyridine sulfate	48448				LC/MS Neg	1595.5	173.987	3.8858	1	0	0	0.68	0	0	0.021	0	0	0.48	0	0	0.25	0	0	0.088	0	0	0.48	0	0	0.026	0	0	0.036	0	0	0.5	0.94	0.0023	0.12	0.15	0.42	0.01	0.04	0.89	0.01	0.09	0.92
Xenobiotics	Chemical	4-acetamidobenzoate	57585	19266	D03836		LC/MS Neg	1403	178.051	90.0872	1	.	.	.	.	.	.	.	.	.	.	.	.	.	.	.	.	.	.	.	.	.	.	.	.	.	.	.	.	.	.	.	.	.	.	.	.	.	.
Xenobiotics	Chemical	4-hydroxychlorothalonil	48441	34217			LC/MS Neg	4427	244.908	0.1586	1	0.04	0.02	0.088	0.07	0.02	0.0001	0.08	0.04	0.057	0.05	0.02	0.03	0.06	0.01	3.2e-07	0.05	0.02	0.022	0.06	0.01	2.9e-05	0.06	0.01	1e-05	0.06	0.02	0.0042	0.00066	1.4e-07	1.03	0.86	0.23	1.08	0.49	0.026	0.63	1.7	0.71
Xenobiotics	Chemical	6-hydroxyindole sulfate	48698				LC/MS Neg	2498	212.002	0.3965	1	-0.02	0.02	0.23	-0.03	0.01	0.059	0	0.01	0.87	-0.02	0.02	0.14	-0.01	0.01	0.14	0	0.01	0.95	-0.02	0.01	0.027	-0.03	0.01	0.013	-0.01	0.01	0.46	0.013	3e-08	-1.25	0.78	0.11	0.1	0.41	0.81	0.25	0.47	0.6
Xenobiotics	Chemical	Dexpanthenol	38314	4678	D03726	HMDB04231	LC/MS Pos Early	1740	206.139	99.9207	1	.	.	.	.	.	.	.	.	.	.	.	.	.	.	.	.	.	.	.	.	.	.	.	.	.	.	.	.	.	.	.	.	.	.	.	.	.	.
Xenobiotics	Chemical	Dimethyl sulfone	43424	6213	C11142	HMDB04983	LC/MS Pos Early	832	95.0161	6.7407	1	0	0	0.63	0	0	0.29	0	0.01	0.9	0	0	0.94	0	0	0.33	0	0	0.78	0	0	0.34	0	0	0.24	0	0	0.76	0.074	0.1	0.03	0.06	0.66	0.03	0.03	0.36	-0.35	0.53	0.51
Xenobiotics	Chemical	Ectoine	35651	126041	C06231		LC/MS Pos Early	1980	143.082	3.9651	1	0.01	0.01	0.23	0.01	0.01	0.032	0	0.01	0.83	0.01	0.01	0.33	0.01	0	0.03	0	0.01	0.68	0.01	0	0.03	0.01	0.01	0.011	0	0.01	0.46	0.00014	0.0085	0.45	0.39	0.25	0.22	0.17	0.2	-0.09	0.42	0.84
Xenobiotics	Chemical	Ethyl glucuronide	39603	152226		HMDB10325	LC/MS Neg	793	221.067	70.1824	1	0.02	0.02	0.37	0.01	0.01	0.63	0	0.02	0.92	-0.01	0.02	0.42	0	0.01	0.81	0	0.01	0.98	0	0.01	0.74	0.01	0.01	0.36	-0.01	0.01	0.32	4.9e-06	1.7e-05	-0.95	0.67	0.15	0.14	0.41	0.73	-0.09	0.92	0.92
Xenobiotics	Chemical	Lanthionine	42002	98504			LC/MS Pos Early	1730	209.059	42.3473	1	.	.	.	.	.	.	.	.	.	.	.	.	.	.	.	.	.	.	.	.	.	.	.	.	.	.	.	.	.	.	.	.	.	.	.	.	.	.
Xenobiotics	Chemical	Methylnaphthyl sulfate (1)*	47676				LC/MS Neg	4142	237.023	71.2133	2	0.01	0.02	0.5	-0.03	0.02	0.096	0.01	0.02	0.8	0.02	0.02	0.49	0	0.01	0.95	0.01	0.01	0.62	-0.01	0.02	0.61	-0.01	0.01	0.46	0.01	0.02	0.47	0.00012	7.9e-08	-0.17	0.7	0.81	-0.13	0.58	0.83	1.29	0.96	0.18
Xenobiotics	Chemical	Methylnaphthyl sulfate (2)*	46362				LC/MS Neg	4186.6	237.023	55.5115	2	0.02	0.02	0.41	-0.05	0.02	0.011	0	0.03	0.95	-0.02	0.02	0.35	-0.02	0.01	0.065	0.01	0.02	0.66	-0.03	0.01	0.016	-0.02	0.01	0.12	-0.02	0.02	0.39	0.00059	1.5e-07	-0.42	0.73	0.56	-0.03	0.49	0.95	1.13	1.15	0.33
Xenobiotics	Chemical	O-sulfo-L-tyrosine	45413	514186			LC/MS Neg	990	260.023	0	1	-0.12	0.04	0.0057	0.02	0.04	0.66	-0.06	0.03	0.053	-0.07	0.03	0.036	-0.04	0.02	0.0079	-0.06	0.02	0.0091	-0.03	0.02	0.18	-0.04	0.03	0.17	-0.06	0.02	0.0079	1.8e-06	1.8e-08	-3.22	1.64	0.05	-0.9	1.12	0.43	-1.34	1.24	0.28
Xenobiotics	Chemical	PEG-glucuronide, fragment 04*	52872				LC/MS Neg	1695	353.146	79.3021	2	-0.01	0.02	0.74	-0.01	0.01	0.6	0.01	0.04	0.7	-0.01	0.02	0.57	-0.01	0.01	0.5	0	0.02	0.9	-0.01	0.01	0.45	-0.01	0.01	0.54	-0.01	0.02	0.68	1e-05	3.9e-07	-0.21	0.8	0.79	-0.04	0.36	0.92	-0.78	1.55	0.61
Xenobiotics	Chemical	PEG-glucuronide, fragment 07*	52875				LC/MS Neg	2301	485.225	93.3386	2	.	.	.	.	.	.	.	.	.	.	.	.	.	.	.	.	.	.	.	.	.	.	.	.	.	.	.	.	.	.	.	.	.	.	.	.	.	.
Xenobiotics	Chemical	PEG-glycoside, fragment 06*	52879				LC/MS Neg	2713	427.219	42.5852	2	0	0	0.68	0	0	0.47	0	0	0.91	0	0	0.47	0	0	0.51	0	0	0.54	0	0	0.72	0	0	0.76	0	0	0.56	0.98	0.18	0	0.01	0.79	-0.01	0.01	0.2	0	0.01	0.86
Xenobiotics	Chemical	PEG-glycoside, fragment 08*	52881				LC/MS Neg	3012	515.271	76.5266	2	-0.02	0.02	0.42	0.01	0.01	0.58	0.01	0.03	0.68	0.03	0.02	0.21	0.01	0.01	0.29	0	0.02	0.82	0.01	0.01	0.23	0	0.01	0.87	0.02	0.02	0.18	1.8e-06	8.1e-09	0.88	0.72	0.22	0.06	0.35	0.87	1.12	1.29	0.39
Xenobiotics	Chemical	PEG-glycoside,glucuronide, fragment 05*	52874				LC/MS Neg	2191	603.251	95.3212	2	.	.	.	.	.	.	.	.	.	.	.	.	.	.	.	.	.	.	.	.	.	.	.	.	.	.	.	.	.	.	.	.	.	.	.	.	.	.
Xenobiotics	Chemical	PEG-glycoside,glucuronide, fragment 06*	52878				LC/MS Neg	2111	441.198	87.6289	2	.	.	.	.	.	.	.	.	.	.	.	.	.	.	.	.	.	.	.	.	.	.	.	.	.	.	.	.	.	.	.	.	.	.	.	.	.	.
Xenobiotics	Chemical	Perfluorooctanesulfonic acid (PFOS)	57564	74483	C18142	HMDB59586	LC/MS Polar	662	498.93	0.0793	1	0.01	0.02	0.44	0.04	0.01	0.0012	0.03	0.02	0.12	0.02	0.01	0.014	0.03	0.01	2.9e-06	0.03	0.01	0.044	0.03	0.01	8.6e-05	0.04	0.01	0.00045	0.03	0.01	0.0025	0.00013	0.0022	0.24	0.74	0.74	0.3	0.34	0.39	-0.01	0.79	0.98
Xenobiotics	Chemical	Perfluorooctanoate (PFOA)*	46593				LC/MS Neg	5136	412.965	3.9651	2	0	0.02	0.83	0.01	0.01	0.51	0.06	0.03	0.036	0.05	0.02	0.0073	0.02	0.01	0.0056	0.02	0.02	0.18	0.02	0.01	0.023	0.01	0.01	0.43	0.05	0.01	0.0011	0.00015	3.1e-08	-0.42	0.66	0.52	-0.08	0.33	0.81	0.09	1.24	0.94
Xenobiotics	Chemical	Succinimide	41888	11439	C07273		LC/MS Polar	2155	116.035	31.0864	1	-0.01	0.03	0.82	-0.01	0.02	0.76	0	0.05	0.99	0	0.03	0.88	-0.01	0.01	0.54	-0.01	0.03	0.84	-0.01	0.02	0.67	-0.01	0.02	0.64	-0.01	0.03	0.81	8.1e-06	4e-07	1.28	1.19	0.28	0.12	0.57	0.83	0.65	1.8	0.72
Xenobiotics	Chemical	Sulfate*	46960	1118	C00059	HMDB01448	LC/MS Neg	616	96.9601	0	2	-0.15	0.08	0.047	0.01	0.07	0.93	-0.15	0.09	0.12	-0.18	0.08	0.036	-0.1	0.04	0.014	-0.12	0.06	0.036	-0.08	0.05	0.15	-0.06	0.05	0.23	-0.16	0.06	0.01	4.9e-07	4.1e-08	-4.08	2.95	0.17	1.46	1.96	0.46	-3.34	3.96	0.4
Xenobiotics	Chemical	Thioproline	53231	93176			LC/MS Pos Early	1250	134.027	0	1	-0.02	0.04	0.58	0.03	0.04	0.43	0.13	0.06	0.045	0.09	0.04	0.024	0.06	0.02	0.0047	0.05	0.04	0.16	0.07	0.03	0.015	0.01	0.03	0.73	0.1	0.03	0.0026	3e-05	8.6e-09	0.03	1.7	0.98	-0.65	1.02	0.52	3.96	2.68	0.14
Xenobiotics	Drug	1-hydroxy-2-naphthalenecarboxylate	38140	6844	C03203		LC/MS Neg	3930	187.04	92.9421	1	.	.	.	.	.	.	.	.	.	.	.	.	.	.	.	.	.	.	.	.	.	.	.	.	.	.	.	.	.	.	.	.	.	.	.	.	.	.
Xenobiotics	Drug	2-acetamidophenol sulfate	48580	181671			LC/MS Neg	2251	230.013	74.4647	1	0.05	0.02	0.012	0	0.01	0.88	-0.01	0.02	0.58	0.01	0.02	0.71	0.01	0.01	0.49	0.02	0.01	0.25	0	0.01	0.88	0.01	0.01	0.25	0	0.01	0.93	4.5e-05	4.9e-06	-0.69	0.72	0.34	-0.24	0.39	0.54	0.04	0.99	0.97
Xenobiotics	Drug	2-hydroxyacetaminophen sulfate*	33173	86290013			LC/MS Neg	1674	246.008	75.337	2	-0.01	0.02	0.51	-0.02	0.01	0.18	-0.05	0.03	0.095	-0.02	0.02	0.26	-0.02	0.01	0.027	-0.03	0.02	0.067	-0.02	0.01	0.1	-0.01	0.01	0.14	-0.03	0.02	0.1	3.4e-06	3.6e-06	0.35	0.66	0.6	-0.4	0.35	0.26	0.03	1.29	0.98
Xenobiotics	Drug	2-hydroxycarbamazepine	57789	129274	C16601	HMDB60651	LC/MS Neg	4056	251.083	99.6828	1	.	.	.	.	.	.	.	.	.	.	.	.	.	.	.	.	.	.	.	.	.	.	.	.	.	.	.	.	.	.	.	.	.	.	.	.	.	.
Xenobiotics	Drug	2-hydroxyibuprofen	43330	10443535		HMDB60920	LC/MS Neg	3462	221.118	89.6114	1	.	.	.	.	.	.	.	.	.	.	.	.	.	.	.	.	.	.	.	.	.	.	.	.	.	.	.	.	.	.	.	.	.	.	.	.	.	.
Xenobiotics	Drug	2-methoxyacetaminophen glucuronide*	33161	14367271			LC/MS Neg	1633	356.099	81.7605	2	.	.	.	.	.	.	.	.	.	.	.	.	.	.	.	.	.	.	.	.	.	.	.	.	.	.	.	.	.	.	.	.	.	.	.	.	.	.
Xenobiotics	Drug	2-methoxyacetaminophen sulfate*	47031	86290014			LC/MS Neg	1949	260.023	83.7431	2	.	.	.	.	.	.	.	.	.	.	.	.	.	.	.	.	.	.	.	.	.	.	.	.	.	.	.	.	.	.	.	.	.	.	.	.	.	.
Xenobiotics	Drug	2-propyl-2-pentenoate (2-ene-valproate)	57778	6437068	C16653	HMDB13902	LC/MS Neg	3874	141.092	99.4449	1	.	.	.	.	.	.	.	.	.	.	.	.	.	.	.	.	.	.	.	.	.	.	.	.	.	.	.	.	.	.	.	.	.	.	.	.	.	.
Xenobiotics	Drug	3-(cystein-S-yl)acetaminophen*	34365	5233914			LC/MS Pos Early	2420	271.075	87.0738	2	.	.	.	.	.	.	.	.	.	.	.	.	.	.	.	.	.	.	.	.	.	.	.	.	.	.	.	.	.	.	.	.	.	.	.	.	.	.
Xenobiotics	Drug	3-(N-acetyl-L-cystein-S-yl) acetaminophen	45721	83967			LC/MS Neg	2094	311.071	82.3949	1	.	.	.	.	.	.	.	.	.	.	.	.	.	.	.	.	.	.	.	.	.	.	.	.	.	.	.	.	.	.	.	.	.	.	.	.	.	.
Xenobiotics	Drug	3-hydroxycarbamazepine	57788	135290	C16602	HMDB60653	LC/MS Neg	4280	251.083	99.7621	1	.	.	.	.	.	.	.	.	.	.	.	.	.	.	.	.	.	.	.	.	.	.	.	.	.	.	.	.	.	.	.	.	.	.	.	.	.	.
Xenobiotics	Drug	3-hydroxyvalproate	57781	134459	C16651	HMDB13899	LC/MS Neg	2912	159.103	99.4449	1	.	.	.	.	.	.	.	.	.	.	.	.	.	.	.	.	.	.	.	.	.	.	.	.	.	.	.	.	.	.	.	.	.	.	.	.	.	.
Xenobiotics	Drug	4-acetamidophenol	12032	1983	C06804	HMDB01859	LC/MS Neg	2173.7	150.056	79.778	1	-0.01	0.02	0.58	-0.02	0.01	0.16	-0.02	0.03	0.57	-0.01	0.02	0.53	-0.02	0.01	0.085	-0.02	0.02	0.22	-0.02	0.01	0.15	-0.02	0.01	0.14	-0.01	0.02	0.46	8.8e-06	6.2e-07	0.5	0.68	0.47	-0.47	0.37	0.2	0.76	1.42	0.59
Xenobiotics	Drug	4-acetamidophenylglucuronide	15736	83944		HMDB10316	LC/MS Neg	1400	326.088	74.3061	1	-0.01	0.02	0.47	-0.02	0.01	0.11	-0.03	0.03	0.25	-0.03	0.02	0.13	-0.02	0.01	0.0098	-0.02	0.02	0.12	-0.02	0.01	0.033	-0.02	0.01	0.073	-0.03	0.02	0.077	8.8e-06	3.1e-06	-0.06	0.65	0.93	-0.4	0.34	0.25	0.48	1.22	0.69
Xenobiotics	Drug	4-acetaminophen sulfate	37475	83939	C06804	HMDB59911	LC/MS Neg	1792	230.013	66.2966	1	-0.01	0.02	0.64	-0.02	0.01	0.15	-0.06	0.03	0.036	-0.02	0.02	0.25	-0.02	0.01	0.016	-0.03	0.01	0.052	-0.02	0.01	0.084	-0.01	0.01	0.13	-0.03	0.01	0.054	2.8e-06	6.4e-06	0.05	0.61	0.93	-0.24	0.33	0.47	-0.03	1.16	0.98
Xenobiotics	Drug	4-acetylphenol sulfate	44620	4684006			LC/MS Neg	2375	215.002	62.1729	1	0.01	0.02	0.49	0	0.01	0.74	0.02	0.02	0.33	0.01	0.02	0.52	0.01	0.01	0.29	0.02	0.01	0.17	0	0.01	0.82	0	0.01	0.88	0.01	0.01	0.29	9.8e-05	1.2e-07	0.11	0.66	0.87	0.02	0.36	0.95	0.27	0.92	0.77
Xenobiotics	Drug	4-aminophenol sulfate (2)	54809				LC/MS Neg	1168	188.002	95.4798	1	.	.	.	.	.	.	.	.	.	.	.	.	.	.	.	.	.	.	.	.	.	.	.	.	.	.	.	.	.	.	.	.	.	.	.	.	.	.
Xenobiotics	Drug	4-hydroxycoumarin	37445	54682930	C20414		LC/MS Neg	2470	161.024	62.0936	1	0.03	0.02	0.071	0.02	0.01	0.13	0	0.02	0.88	0.02	0.02	0.25	0.02	0.01	0.019	0.02	0.01	0.19	0.02	0.01	0.059	0.02	0.01	0.024	0.01	0.01	0.27	2.3e-05	1.9e-06	0.22	0.62	0.73	0.16	0.34	0.64	-0.05	1	0.96
Xenobiotics	Drug	Allopurinol	43534	2094			LC/MS Neg	1530	135.031	99.4449	1	.	.	.	.	.	.	.	.	.	.	.	.	.	.	.	.	.	.	.	.	.	.	.	.	.	.	.	.	.	.	.	.	.	.	.	.	.	.
Xenobiotics	Drug	Amoxicillin	52948	2171	C06827	HMDB15193	LC/MS Neg	2365	364.097	99.6035	1	.	.	.	.	.	.	.	.	.	.	.	.	.	.	.	.	.	.	.	.	.	.	.	.	.	.	.	.	.	.	.	.	.	.	.	.	.	.
Xenobiotics	Drug	Aripiprazole	52960	60795	D01164,C12564	HMDB05042	LC/MS Pos Late	1000	448.155	98.8898	1	.	.	.	.	.	.	.	.	.	.	.	.	.	.	.	.	.	.	.	.	.	.	.	.	.	.	.	.	.	.	.	.	.	.	.	.	.	.
Xenobiotics	Drug	Atenolol	38658	2249	D00235	HMDB01924	LC/MS Pos Early	2668	267.17	97.5416	1	.	.	.	.	.	.	.	.	.	.	.	.	.	.	.	.	.	.	.	.	.	.	.	.	.	.	.	.	.	.	.	.	.	.	.	.	.	.
Xenobiotics	Drug	Benzoylecgonine	39678	442997	C10847	HMDB41836	LC/MS Pos Early	3061	290.139	95.3212	1	.	.	.	.	.	.	.	.	.	.	.	.	.	.	.	.	.	.	.	.	.	.	.	.	.	.	.	.	.	.	.	.	.	.	.	.	.	.
Xenobiotics	Drug	Carbamazepine	37033	2554	D00252	HMDB14704	LC/MS Pos Late	880	237.102	99.6828	1	.	.	.	.	.	.	.	.	.	.	.	.	.	.	.	.	.	.	.	.	.	.	.	.	.	.	.	.	.	.	.	.	.	.	.	.	.	.
Xenobiotics	Drug	Carbamazepine 10,11-epoxide*	37020	2555	C07496	HMDB60658	LC/MS Pos Early	3020	253.097	99.6828	2	.	.	.	.	.	.	.	.	.	.	.	.	.	.	.	.	.	.	.	.	.	.	.	.	.	.	.	.	.	.	.	.	.	.	.	.	.	.
Xenobiotics	Drug	Carbamazepine glucuronide*	37056				LC/MS Neg	3884	411.12	99.6828	2	.	.	.	.	.	.	.	.	.	.	.	.	.	.	.	.	.	.	.	.	.	.	.	.	.	.	.	.	.	.	.	.	.	.	.	.	.	.
Xenobiotics	Drug	Carboxyibuprofen	43333	10444113		HMDB60564	LC/MS Neg	1920	235.098	85.1705	1	.	.	.	.	.	.	.	.	.	.	.	.	.	.	.	.	.	.	.	.	.	.	.	.	.	.	.	.	.	.	.	.	.	.	.	.	.	.
Xenobiotics	Drug	Celecoxib	38599	2662	C07589	HMDB05014	LC/MS Neg	5283	380.069	99.5242	1	.	.	.	.	.	.	.	.	.	.	.	.	.	.	.	.	.	.	.	.	.	.	.	.	.	.	.	.	.	.	.	.	.	.	.	.	.	.
Xenobiotics	Drug	Cetirizine	54745	2678	C07778	HMDB05032	LC/MS Pos Late	1052	389.163	91.1975	1	.	.	.	.	.	.	.	.	.	.	.	.	.	.	.	.	.	.	.	.	.	.	.	.	.	.	.	.	.	.	.	.	.	.	.	.	.	.
Xenobiotics	Drug	Chlorthalidone	54784	2732	D00272		LC/MS Neg	3600	337.006	99.8414	1	.	.	.	.	.	.	.	.	.	.	.	.	.	.	.	.	.	.	.	.	.	.	.	.	.	.	.	.	.	.	.	.	.	.	.	.	.	.
Xenobiotics	Drug	Cimetidine	42592				LC/MS Pos Early	2715	253.123	99.8414	1	.	.	.	.	.	.	.	.	.	.	.	.	.	.	.	.	.	.	.	.	.	.	.	.	.	.	.	.	.	.	.	.	.	.	.	.	.	.
Xenobiotics	Drug	Ciprofloxacin	57614	4011971;2764	C05349		LC/MS Neg	2724	392.126	99.6828	1	.	.	.	.	.	.	.	.	.	.	.	.	.	.	.	.	.	.	.	.	.	.	.	.	.	.	.	.	.	.	.	.	.	.	.	.	.	.
Xenobiotics	Drug	Delta 9-trans-tetrahydrocannabinol (THC)	57832	16078	D00306,C06972	HMDB14613	LC/MS Neg	6044	313.217	94.6075	1	.	.	.	.	.	.	.	.	.	.	.	.	.	.	.	.	.	.	.	.	.	.	.	.	.	.	.	.	.	.	.	.	.	.	.	.	.	.
Xenobiotics	Drug	Desmethylnaproxen	46331	13393711		HMDB13989	LC/MS Neg	3045	215.071	91.7526	1	.	.	.	.	.	.	.	.	.	.	.	.	.	.	.	.	.	.	.	.	.	.	.	.	.	.	.	.	.	.	.	.	.	.	.	.	.	.
Xenobiotics	Drug	Desmethylnaproxen sulfate	46106	184679			LC/MS Neg	2250	295.028	83.7431	1	.	.	.	.	.	.	.	.	.	.	.	.	.	.	.	.	.	.	.	.	.	.	.	.	.	.	.	.	.	.	.	.	.	.	.	.	.	.
Xenobiotics	Drug	Dexlansoprazole	57668	9578005	D08903		LC/MS Neg	4874	368.069	99.2863	1	.	.	.	.	.	.	.	.	.	.	.	.	.	.	.	.	.	.	.	.	.	.	.	.	.	.	.	.	.	.	.	.	.	.	.	.	.	.
Xenobiotics	Drug	Dextromethorphan	38301	5362449	C06947	HMDB01920	LC/MS Pos Late	904	272.201	97.5416	1	.	.	.	.	.	.	.	.	.	.	.	.	.	.	.	.	.	.	.	.	.	.	.	.	.	.	.	.	.	.	.	.	.	.	.	.	.	.
Xenobiotics	Drug	Diltiazem	42981	39186	C06958	HMDB14487	LC/MS Pos Late	888	415.169	99.4449	1	.	.	.	.	.	.	.	.	.	.	.	.	.	.	.	.	.	.	.	.	.	.	.	.	.	.	.	.	.	.	.	.	.	.	.	.	.	.
Xenobiotics	Drug	Diphenhydramine	38669	3100	C06960	HMDB01927	LC/MS Pos Late	911	256.17	88.5805	1	.	.	.	.	.	.	.	.	.	.	.	.	.	.	.	.	.	.	.	.	.	.	.	.	.	.	.	.	.	.	.	.	.	.	.	.	.	.
Xenobiotics	Drug	Enalapril	52949	3222			LC/MS Pos Late	900	377.207	99.3656	1	.	.	.	.	.	.	.	.	.	.	.	.	.	.	.	.	.	.	.	.	.	.	.	.	.	.	.	.	.	.	.	.	.	.	.	.	.	.
Xenobiotics	Drug	Escitalopram	40459	146570	D07913	HMDB05028	LC/MS Pos Late	908	325.171	95.004	1	.	.	.	.	.	.	.	.	.	.	.	.	.	.	.	.	.	.	.	.	.	.	.	.	.	.	.	.	.	.	.	.	.	.	.	.	.	.
Xenobiotics	Drug	Famotidine	42613	5702160	D00318	HMDB01919	LC/MS Neg	2620	336.038	98.9691	1	.	.	.	.	.	.	.	.	.	.	.	.	.	.	.	.	.	.	.	.	.	.	.	.	.	.	.	.	.	.	.	.	.	.	.	.	.	.
Xenobiotics	Drug	Fexofenadine	42021	3348	C06999	HMDB05030	LC/MS Pos Late	944	502.295	98.9691	1	.	.	.	.	.	.	.	.	.	.	.	.	.	.	.	.	.	.	.	.	.	.	.	.	.	.	.	.	.	.	.	.	.	.	.	.	.	.
Xenobiotics	Drug	Fluconazole	57707	3365	D00322	HMDB14342	LC/MS Neg	3564	305.097	98.9691	1	.	.	.	.	.	.	.	.	.	.	.	.	.	.	.	.	.	.	.	.	.	.	.	.	.	.	.	.	.	.	.	.	.	.	.	.	.	.
Xenobiotics	Drug	Fluoxetine	44619	3386	D00326		LC/MS Pos Late	1025	310.141	97.8588	1	.	.	.	.	.	.	.	.	.	.	.	.	.	.	.	.	.	.	.	.	.	.	.	.	.	.	.	.	.	.	.	.	.	.	.	.	.	.
Xenobiotics	Drug	Furosemide	43009	3440	D00331	HMDB01933	LC/MS Neg	3515	329	96.1935	1	.	.	.	.	.	.	.	.	.	.	.	.	.	.	.	.	.	.	.	.	.	.	.	.	.	.	.	.	.	.	.	.	.	.	.	.	.	.
Xenobiotics	Drug	Gabapentin	38686	3446	D00332	HMDB05015	LC/MS Pos Early	3123	172.133	92.8628	1	.	.	.	.	.	.	.	.	.	.	.	.	.	.	.	.	.	.	.	.	.	.	.	.	.	.	.	.	.	.	.	.	.	.	.	.	.	.
Xenobiotics	Drug	Guaifenesin	43390	3516	D00337	HMDB04998	LC/MS Neg	3580	123.045	99.1277	1	.	.	.	.	.	.	.	.	.	.	.	.	.	.	.	.	.	.	.	.	.	.	.	.	.	.	.	.	.	.	.	.	.	.	.	.	.	.
Xenobiotics	Drug	Hydrochlorothiazide	39625	3639	C07041	HMDB01928	LC/MS Neg	2046	295.957	86.0428	1	.	.	.	.	.	.	.	.	.	.	.	.	.	.	.	.	.	.	.	.	.	.	.	.	.	.	.	.	.	.	.	.	.	.	.	.	.	.
Xenobiotics	Drug	Hydroquinone sulfate	35322	161220	C00530	HMDB02434	LC/MS Neg	1395	188.986	8.6439	1	-0.01	0.01	0.45	0	0.01	0.68	0	0	0.57	0	0.01	0.64	0	0	0.62	0	0	0.68	0	0	0.72	0	0.01	0.42	0	0	0.57	0.033	0.00027	-0.59	0.44	0.18	0	0.15	0.98	0	0.19	0.98
Xenobiotics	Drug	Hydroxybupropion	32882	446		HMDB12235	LC/MS Pos Early	3479	256.11	93.973	1	.	.	.	.	.	.	.	.	.	.	.	.	.	.	.	.	.	.	.	.	.	.	.	.	.	.	.	.	.	.	.	.	.	.	.	.	.	.
Xenobiotics	Drug	Hydroxypioglitazone (M-IV)	43580				LC/MS Pos Early	3080	373.122	99.6828	1	.	.	.	.	.	.	.	.	.	.	.	.	.	.	.	.	.	.	.	.	.	.	.	.	.	.	.	.	.	.	.	.	.	.	.	.	.	.
Xenobiotics	Drug	Ibuprofen	17799	3672	D00126	HMDB01925	LC/MS Neg	4925	205.123	92.6249	1	.	.	.	.	.	.	.	.	.	.	.	.	.	.	.	.	.	.	.	.	.	.	.	.	.	.	.	.	.	.	.	.	.	.	.	.	.	.
Xenobiotics	Drug	Ibuprofen acyl glucuronide	38366	163959			LC/MS Neg	4976	381.155	88.5012	1	.	.	.	.	.	.	.	.	.	.	.	.	.	.	.	.	.	.	.	.	.	.	.	.	.	.	.	.	.	.	.	.	.	.	.	.	.	.
Xenobiotics	Drug	Ketopioglitazone	43579				LC/MS Pos Late	802	371.106	99.6828	1	.	.	.	.	.	.	.	.	.	.	.	.	.	.	.	.	.	.	.	.	.	.	.	.	.	.	.	.	.	.	.	.	.	.	.	.	.	.
Xenobiotics	Drug	Lamotrigine	54762	3878	D00354	HMDB14695,HMDB05043	LC/MS Pos Early	3379	256.015	99.5242	1	.	.	.	.	.	.	.	.	.	.	.	.	.	.	.	.	.	.	.	.	.	.	.	.	.	.	.	.	.	.	.	.	.	.	.	.	.	.
Xenobiotics	Drug	Levetiracetam	57641	5284583	D00709,C07841		LC/MS Pos Early	1925	171.113	99.3656	1	.	.	.	.	.	.	.	.	.	.	.	.	.	.	.	.	.	.	.	.	.	.	.	.	.	.	.	.	.	.	.	.	.	.	.	.	.	.
Xenobiotics	Drug	Lisinopril	54787	3937			LC/MS Neg	2617	404.219	91.8319	1	.	.	.	.	.	.	.	.	.	.	.	.	.	.	.	.	.	.	.	.	.	.	.	.	.	.	.	.	.	.	.	.	.	.	.	.	.	.
Xenobiotics	Drug	Meclizine	57807	4034	C07116,D08163	HMDB14875	LC/MS Pos Late	1183	391.194	99.9207	1	.	.	.	.	.	.	.	.	.	.	.	.	.	.	.	.	.	.	.	.	.	.	.	.	.	.	.	.	.	.	.	.	.	.	.	.	.	.
Xenobiotics	Drug	Meprobamate	21093	4064	D00376	HMDB14515	LC/MS Pos Early	2994	219.134	99.207	1	.	.	.	.	.	.	.	.	.	.	.	.	.	.	.	.	.	.	.	.	.	.	.	.	.	.	.	.	.	.	.	.	.	.	.	.	.	.
Xenobiotics	Drug	Metformin	38306	4091	C07151	HMDB01921	LC/MS Pos Early	2817	130.109	91.8319	1	.	.	.	.	.	.	.	.	.	.	.	.	.	.	.	.	.	.	.	.	.	.	.	.	.	.	.	.	.	.	.	.	.	.	.	.	.	.
Xenobiotics	Drug	Metoclopramide	57666	4168	C07868,D00726	HMDB15363	LC/MS Pos Early	3091	300.147	99.9207	1	.	.	.	.	.	.	.	.	.	.	.	.	.	.	.	.	.	.	.	.	.	.	.	.	.	.	.	.	.	.	.	.	.	.	.	.	.	.
Xenobiotics	Drug	Metoprolol	18037	4171	D02358	HMDB01932	LC/MS Pos Early	3312	268.191	91.9905	1	.	.	.	.	.	.	.	.	.	.	.	.	.	.	.	.	.	.	.	.	.	.	.	.	.	.	.	.	.	.	.	.	.	.	.	.	.	.
Xenobiotics	Drug	Metoprolol acid metabolite*	34109	62936			LC/MS Pos Early	2950	268.154	89.2149	2	.	.	.	.	.	.	.	.	.	.	.	.	.	.	.	.	.	.	.	.	.	.	.	.	.	.	.	.	.	.	.	.	.	.	.	.	.	.
Xenobiotics	Drug	Metronidazole	57642	4173	D00409	HMDB15052	LC/MS Neg	2339	170.057	99.8414	1	.	.	.	.	.	.	.	.	.	.	.	.	.	.	.	.	.	.	.	.	.	.	.	.	.	.	.	.	.	.	.	.	.	.	.	.	.	.
Xenobiotics	Drug	Morphine	21174	5288826	C01516	HMDB14440	LC/MS Pos Early	2591	286.144	99.5242	1	.	.	.	.	.	.	.	.	.	.	.	.	.	.	.	.	.	.	.	.	.	.	.	.	.	.	.	.	.	.	.	.	.	.	.	.	.	.
Xenobiotics	Drug	Morphine-3-glucuronide	61844	5484731	C16643	HMDB41936	LC/MS Neg	2495	460.161	99.5242	1	.	.	.	.	.	.	.	.	.	.	.	.	.	.	.	.	.	.	.	.	.	.	.	.	.	.	.	.	.	.	.	.	.	.	.	.	.	.
Xenobiotics	Drug	Morphine-6-glucuronide	61845	5360621	C16578	HMDB41937	LC/MS Neg	3077	460.161	99.5242	1	.	.	.	.	.	.	.	.	.	.	.	.	.	.	.	.	.	.	.	.	.	.	.	.	.	.	.	.	.	.	.	.	.	.	.	.	.	.
Xenobiotics	Drug	Mycophenolic acid	54800	446541	C20380,D05096	HMDB15159	LC/MS Neg	4185	319.119	99.8414	1	.	.	.	.	.	.	.	.	.	.	.	.	.	.	.	.	.	.	.	.	.	.	.	.	.	.	.	.	.	.	.	.	.	.	.	.	.	.
Xenobiotics	Drug	Mycophenolic acid glucuronide	54792	6442661			LC/MS Neg	2627	495.151	99.8414	1	.	.	.	.	.	.	.	.	.	.	.	.	.	.	.	.	.	.	.	.	.	.	.	.	.	.	.	.	.	.	.	.	.	.	.	.	.	.
Xenobiotics	Drug	N,O-didesmethylvenlafaxine glucuronide	52358			HMDB61167	LC/MS Pos Early	2902	426.212	98.414	1	.	.	.	.	.	.	.	.	.	.	.	.	.	.	.	.	.	.	.	.	.	.	.	.	.	.	.	.	.	.	.	.	.	.	.	.	.	.
Xenobiotics	Drug	Naproxen	12122	156391	C01517	HMDB01923	LC/MS Neg	4155	229.087	82.2363	1	.	.	.	.	.	.	.	.	.	.	.	.	.	.	.	.	.	.	.	.	.	.	.	.	.	.	.	.	.	.	.	.	.	.	.	.	.	.
Xenobiotics	Drug	Norbenzoylecgonine*	43781	74765378			LC/MS Pos Early	3176	276.123	98.7312	2	.	.	.	.	.	.	.	.	.	.	.	.	.	.	.	.	.	.	.	.	.	.	.	.	.	.	.	.	.	.	.	.	.	.	.	.	.	.
Xenobiotics	Drug	Norfluoxetine	37252	4541		HMDB60551	LC/MS Pos Late	1008	296.126	97.7002	1	.	.	.	.	.	.	.	.	.	.	.	.	.	.	.	.	.	.	.	.	.	.	.	.	.	.	.	.	.	.	.	.	.	.	.	.	.	.
Xenobiotics	Drug	Noroxycodone	52363	5489120		HMDB41960	LC/MS Pos Early	2930	302.139	97.5416	1	.	.	.	.	.	.	.	.	.	.	.	.	.	.	.	.	.	.	.	.	.	.	.	.	.	.	.	.	.	.	.	.	.	.	.	.	.	.
Xenobiotics	Drug	O-desmethyltramadol	53239	130829		HMDB60997	LC/MS Pos Early	3045	250.18	96.9865	1	.	.	.	.	.	.	.	.	.	.	.	.	.	.	.	.	.	.	.	.	.	.	.	.	.	.	.	.	.	.	.	.	.	.	.	.	.	.
Xenobiotics	Drug	O-desmethyltramadol glucuronide	52357				LC/MS Pos Early	2741	426.212	96.7486	1	.	.	.	.	.	.	.	.	.	.	.	.	.	.	.	.	.	.	.	.	.	.	.	.	.	.	.	.	.	.	.	.	.	.	.	.	.	.
Xenobiotics	Drug	O-desmethylvenlafaxine	43334	125017	D07793	HMDB60532	LC/MS Pos Early	3253	264.196	98.2554	1	.	.	.	.	.	.	.	.	.	.	.	.	.	.	.	.	.	.	.	.	.	.	.	.	.	.	.	.	.	.	.	.	.	.	.	.	.	.
Xenobiotics	Drug	Ofloxacin	21320	4583	C07321	HMDB01929	LC/MS Neg	3600	360.137	99.9207	1	.	.	.	.	.	.	.	.	.	.	.	.	.	.	.	.	.	.	.	.	.	.	.	.	.	.	.	.	.	.	.	.	.	.	.	.	.	.
Xenobiotics	Drug	Olmesartan	53256	158781	D05246	HMDB14420	LC/MS Neg	3747	445.199	98.8898	1	.	.	.	.	.	.	.	.	.	.	.	.	.	.	.	.	.	.	.	.	.	.	.	.	.	.	.	.	.	.	.	.	.	.	.	.	.	.
Xenobiotics	Drug	Omeprazole	38600	4594	C07324	HMDB01913	LC/MS Neg	4673	344.107	92.9421	1	.	.	.	.	.	.	.	.	.	.	.	.	.	.	.	.	.	.	.	.	.	.	.	.	.	.	.	.	.	.	.	.	.	.	.	.	.	.
Xenobiotics	Drug	Oxycodone	52365	5284603	C08018	HMDB05024	LC/MS Pos Early	2863	316.154	96.9072	1	.	.	.	.	.	.	.	.	.	.	.	.	.	.	.	.	.	.	.	.	.	.	.	.	.	.	.	.	.	.	.	.	.	.	.	.	.	.
Xenobiotics	Drug	Oxypurinol	41726	4644	D02365	HMDB00786	LC/MS Polar	1656	151.026	98.0174	1	.	.	.	.	.	.	.	.	.	.	.	.	.	.	.	.	.	.	.	.	.	.	.	.	.	.	.	.	.	.	.	.	.	.	.	.	.	.
Xenobiotics	Drug	Pantoprazole	38609	4679	C11806	HMDB05017	LC/MS Neg	4398	382.068	96.1142	1	.	.	.	.	.	.	.	.	.	.	.	.	.	.	.	.	.	.	.	.	.	.	.	.	.	.	.	.	.	.	.	.	.	.	.	.	.	.
Xenobiotics	Drug	Paroxetine	40461	43815	D02362,C07415		LC/MS Pos Late	963	330.15	98.4933	1	.	.	.	.	.	.	.	.	.	.	.	.	.	.	.	.	.	.	.	.	.	.	.	.	.	.	.	.	.	.	.	.	.	.	.	.	.	.
Xenobiotics	Drug	Pioglitazone	33139	4829	C07675	HMDB15264	LC/MS Pos Early	3240	357.127	99.7621	1	.	.	.	.	.	.	.	.	.	.	.	.	.	.	.	.	.	.	.	.	.	.	.	.	.	.	.	.	.	.	.	.	.	.	.	.	.	.
Xenobiotics	Drug	Pregabalin	52913	4715169			LC/MS Pos Early	3123	160.133	99.6035	1	.	.	.	.	.	.	.	.	.	.	.	.	.	.	.	.	.	.	.	.	.	.	.	.	.	.	.	.	.	.	.	.	.	.	.	.	.	.
Xenobiotics	Drug	Promethazine	57695	4927	C07404,D00494,D01242	HMDB15202	LC/MS Pos Late	994	285.142	99.0484	1	.	.	.	.	.	.	.	.	.	.	.	.	.	.	.	.	.	.	.	.	.	.	.	.	.	.	.	.	.	.	.	.	.	.	.	.	.	.
Xenobiotics	Drug	Pseudoephedrine	39586	7028	C02765	HMDB01943	LC/MS Pos Early	3041	166.123	97.5416	1	.	.	.	.	.	.	.	.	.	.	.	.	.	.	.	.	.	.	.	.	.	.	.	.	.	.	.	.	.	.	.	.	.	.	.	.	.	.
Xenobiotics	Drug	Quetiapine	39787	5002	C07397	HMDB05021	LC/MS Pos Late	874	384.174	96.5107	1	.	.	.	.	.	.	.	.	.	.	.	.	.	.	.	.	.	.	.	.	.	.	.	.	.	.	.	.	.	.	.	.	.	.	.	.	.	.
Xenobiotics	Drug	Quinine	39767	2728270			LC/MS Pos Early	3378	325.191	99.2863	1	.	.	.	.	.	.	.	.	.	.	.	.	.	.	.	.	.	.	.	.	.	.	.	.	.	.	.	.	.	.	.	.	.	.	.	.	.	.
Xenobiotics	Drug	Ranitidine	38595	3001055	D00422	HMDB01930	LC/MS Pos Early	2910	315.149	95.797	1	.	.	.	.	.	.	.	.	.	.	.	.	.	.	.	.	.	.	.	.	.	.	.	.	.	.	.	.	.	.	.	.	.	.	.	.	.	.
Xenobiotics	Drug	Salicylate	1515	338	C00805	HMDB01895	LC/MS Polar	802	137.024	0.1586	1	0	0	0.5	0	0	0.0045	0	0	0.26	0	0	0.58	0	0	0.097	0	0	0.28	0	0	0.15	0	0	0.054	0	0	0.84	0.9	0.19	0	0	0.41	-0.01	0	0.029	0	0.01	0.84
Xenobiotics	Drug	Salicyluric glucuronide*	33384				LC/MS Neg	1463	370.078	59.0801	2	0	0.02	0.75	-0.04	0.01	0.00052	-0.03	0.02	0.24	0	0.01	0.78	-0.02	0.01	0.028	-0.01	0.01	0.39	-0.02	0.01	0.037	-0.03	0.01	0.0024	0	0.01	0.81	1.9e-05	2.9e-09	0.18	0.57	0.75	-0.82	0.34	0.018	-0.93	1.03	0.37
Xenobiotics	Drug	S-carboxymethyl-L-cysteine	47897	1080	C03727	HMDB29415	LC/MS Pos Early	1490	180.033	18.2395	1	0.02	0.02	0.41	0.02	0.02	0.32	0.02	0.03	0.45	-0.02	0.02	0.3	0.01	0.01	0.4	0.03	0.02	0.14	0	0.01	0.93	0.02	0.01	0.2	-0.01	0.02	0.78	0.00054	1.8e-05	1.56	0.86	0.07	0.11	0.52	0.83	0.56	1.37	0.68
Xenobiotics	Drug	Sertraline	39757	68617	C07246	HMDB05010	LC/MS Pos Late	1070	306.081	96.9865	1	.	.	.	.	.	.	.	.	.	.	.	.	.	.	.	.	.	.	.	.	.	.	.	.	.	.	.	.	.	.	.	.	.	.	.	.	.	.
Xenobiotics	Drug	Sitagliptin	52954	11306691			LC/MS Neg	4485	468.111	99.6035	1	.	.	.	.	.	.	.	.	.	.	.	.	.	.	.	.	.	.	.	.	.	.	.	.	.	.	.	.	.	.	.	.	.	.	.	.	.	.
Xenobiotics	Drug	Sulfamethoxazole	53240	5329	D00285,C07315,D00447	HMDB15150	LC/MS Neg	1941	252.045	98.4933	1	.	.	.	.	.	.	.	.	.	.	.	.	.	.	.	.	.	.	.	.	.	.	.	.	.	.	.	.	.	.	.	.	.	.	.	.	.	.
Xenobiotics	Drug	Tadalafil	52950	4687521			LC/MS Neg	4898	388.13	99.1277	1	.	.	.	.	.	.	.	.	.	.	.	.	.	.	.	.	.	.	.	.	.	.	.	.	.	.	.	.	.	.	.	.	.	.	.	.	.	.
Xenobiotics	Drug	THC carboxylic acid	61836	107885			LC/MS Neg	5263	343.191	87.391	1	.	.	.	.	.	.	.	.	.	.	.	.	.	.	.	.	.	.	.	.	.	.	.	.	.	.	.	.	.	.	.	.	.	.	.	.	.	.
Xenobiotics	Drug	THC carboxylic acid glucuronide	61848				LC/MS Neg	5224	519.224	87.3117	1	.	.	.	.	.	.	.	.	.	.	.	.	.	.	.	.	.	.	.	.	.	.	.	.	.	.	.	.	.	.	.	.	.	.	.	.	.	.
Xenobiotics	Drug	Topiramate	2772	5284627	C07502	HMDB05034	LC/MS Pos Early	3004	357.133	98.7312	1	.	.	.	.	.	.	.	.	.	.	.	.	.	.	.	.	.	.	.	.	.	.	.	.	.	.	.	.	.	.	.	.	.	.	.	.	.	.
Xenobiotics	Drug	Tramadol	53241	33741	C07153	HMDB14339	LC/MS Pos Early	3288	264.196	96.5107	1	.	.	.	.	.	.	.	.	.	.	.	.	.	.	.	.	.	.	.	.	.	.	.	.	.	.	.	.	.	.	.	.	.	.	.	.	.	.
Xenobiotics	Drug	Trazadone	57691	5533	C07156,D08626	HMDB14794	LC/MS Pos Early	3498	372.159	97.8588	1	.	.	.	.	.	.	.	.	.	.	.	.	.	.	.	.	.	.	.	.	.	.	.	.	.	.	.	.	.	.	.	.	.	.	.	.	.	.
Xenobiotics	Drug	Triamterene	42593	5546	D00386	HMDB01940	LC/MS Pos Early	3164	254.115	99.4449	1	.	.	.	.	.	.	.	.	.	.	.	.	.	.	.	.	.	.	.	.	.	.	.	.	.	.	.	.	.	.	.	.	.	.	.	.	.	.
Xenobiotics	Drug	Valproate	22290	3121	C07185	HMDB01877	LC/MS Neg	3885.6	143.108	99.4449	1	.	.	.	.	.	.	.	.	.	.	.	.	.	.	.	.	.	.	.	.	.	.	.	.	.	.	.	.	.	.	.	.	.	.	.	.	.	.
Xenobiotics	Drug	Valsartan	48566	5650			LC/MS Neg	4228	434.22	99.207	1	.	.	.	.	.	.	.	.	.	.	.	.	.	.	.	.	.	.	.	.	.	.	.	.	.	.	.	.	.	.	.	.	.	.	.	.	.	.
Xenobiotics	Drug	Venlafaxine	38623	5656	C07187	HMDB05016	LC/MS Pos Late	848	278.211	98.2554	1	.	.	.	.	.	.	.	.	.	.	.	.	.	.	.	.	.	.	.	.	.	.	.	.	.	.	.	.	.	.	.	.	.	.	.	.	.	.
Xenobiotics	Drug	Verapamil	42990	2520	D02356	HMDB01850	LC/MS Pos Late	945	455.29	99.4449	1	.	.	.	.	.	.	.	.	.	.	.	.	.	.	.	.	.	.	.	.	.	.	.	.	.	.	.	.	.	.	.	.	.	.	.	.	.	.
Xenobiotics	Drug	Warfarin	43335		C01541	HMDB01935	LC/MS Neg	3790	307.098	99.0484	1	.	.	.	.	.	.	.	.	.	.	.	.	.	.	.	.	.	.	.	.	.	.	.	.	.	.	.	.	.	.	.	.	.	.	.	.	.	.
Xenobiotics	Food Component/Plant	1,6-anhydroglucose	21049	2724705		HMDB00640	LC/MS Neg	919.7	161.046	71.6098	1	-0.01	0.02	0.41	-0.03	0.01	0.044	-0.03	0.02	0.14	-0.01	0.02	0.75	-0.02	0.01	0.023	-0.02	0.01	0.16	-0.02	0.01	0.1	-0.02	0.01	0.028	-0.02	0.01	0.28	3e-05	1.4e-07	0.1	0.58	0.86	-0.59	0.37	0.11	-1.39	0.96	0.15
Xenobiotics	Food Component/Plant	2,3-dihydroxyisovalerate	38276	677	C04039	HMDB12141	LC/MS Polar	1050	133.051	11.1816	1	0	0	0.92	0	0	0.98	0	0	0.61	0	0	0.47	0	0	0.6	0	0	0.62	0	0	0.58	0	0	0.91	0	0	0.38	0.014	0.18	-0.12	0.08	0.13	0.02	0.03	0.58	-0.02	0.12	0.84
Xenobiotics	Food Component/Plant	2-keto-3-deoxy-gluconate	48141	161227	C00204	HMDB01353	LC/MS Polar	1900	177.04	4.0444	1	-0.05	0.02	0.012	-0.01	0.02	0.64	-0.01	0.01	0.36	-0.04	0.01	0.0025	-0.02	0.01	0.00082	-0.02	0.01	0.041	-0.03	0.01	0.008	-0.02	0.01	0.064	-0.03	0.01	0.0041	0.0017	5.4e-07	-0.64	0.64	0.32	-0.19	0.44	0.66	-0.61	0.61	0.32
Xenobiotics	Food Component/Plant	2-oxindole-3-acetate	40479	3080590		HMDB35514	LC/MS Neg	2076	190.051	66.3759	1	-0.01	0.02	0.4	0	0.01	0.86	0	0.03	0.9	-0.02	0.02	0.35	-0.01	0.01	0.43	-0.01	0.01	0.58	-0.01	0.01	0.45	0	0.01	0.67	-0.01	0.01	0.42	8e-06	1.6e-06	-0.37	0.61	0.54	0.27	0.34	0.43	-0.47	1.09	0.67
Xenobiotics	Food Component/Plant	2-piperidinone	43400	12665		HMDB11749	LC/MS Pos Early	1675	100.076	0.6344	1	0	0	0.15	0	0	0.39	0	0	0.27	0	0.01	0.94	0	0	0.14	0	0	0.045	0	0	0.47	0	0	0.53	0	0	0.21	0.0003	0.024	-0.15	0.11	0.18	0.1	0.11	0.39	-0.13	0.11	0.27
Xenobiotics	Food Component/Plant	3-formylindole	46738				LC/MS Neg	3692	144.046	0	1	-0.01	0.03	0.67	0	0.03	0.9	-0.03	0.04	0.52	-0.01	0.03	0.66	-0.01	0.02	0.59	-0.01	0.03	0.66	0	0.02	0.82	-0.01	0.02	0.78	-0.02	0.03	0.46	1.5e-06	2.8e-07	0.91	1.23	0.46	0.82	0.73	0.26	0.44	1.78	0.81
Xenobiotics	Food Component/Plant	4-allylphenol sulfate	37181				LC/MS Neg	3805	213.023	2.2998	1	0	0.01	0.8	0.01	0.01	0.023	0	0.01	0.67	0.01	0.01	0.36	0.01	0	0.083	0	0	0.87	0.01	0	0.023	0.01	0	0.066	0	0	0.54	7.4e-06	0.0022	0.23	0.23	0.31	0.06	0.16	0.69	0.14	0.33	0.67
Xenobiotics	Food Component/Plant	4-ethylphenol glucuronide	52937				LC/MS Neg	3167	297.098	94.8454	1	.	.	.	.	.	.	.	.	.	.	.	.	.	.	.	.	.	.	.	.	.	.	.	.	.	.	.	.	.	.	.	.	.	.	.	.	.	.
Xenobiotics	Food Component/Plant	4-vinylguaiacol sulfate	48442				LC/MS Neg	3354	229.018	52.8945	1	0.01	0.02	0.73	-0.05	0.01	0.00099	0.01	0.02	0.62	-0.04	0.02	0.034	-0.03	0.01	0.0021	0	0.01	0.81	-0.04	0.01	0.00018	-0.03	0.01	0.0091	-0.02	0.01	0.1	0.00037	7.2e-08	0.7	0.71	0.32	-0.34	0.4	0.4	0.32	1.02	0.76
Xenobiotics	Food Component/Plant	Acesulfame	48569	36573		HMDB33585	LC/MS Neg	1581	161.987	58.9215	1	0.01	0.01	0.69	0.01	0.01	0.31	0.03	0.02	0.14	0.02	0.02	0.23	0.02	0.01	0.015	0.02	0.01	0.091	0.02	0.01	0.081	0.01	0.01	0.22	0.02	0.01	0.069	3.2e-05	1.9e-08	-0.45	0.57	0.43	0.25	0.33	0.46	0.28	0.98	0.78
Xenobiotics	Food Component/Plant	Alliin	41494	87310	C08265	HMDB33592	LC/MS Pos Early	1470	178.053	33.1483	1	0.01	0.01	0.52	0	0.01	0.34	0.02	0.01	0.19	-0.01	0.01	0.13	0	0	0.69	0.01	0.01	0.081	0	0	0.57	0.01	0	0.2	0	0.01	0.43	0.4	0.063	-0.23	0.3	0.44	-0.07	0.08	0.39	0.62	0.47	0.19
Xenobiotics	Food Component/Plant	Betonicine	38100	164642	C08269	HMDB29412	LC/MS Pos Early	1012	160.097	48.7708	1	0	0	0.89	0	0	0.36	0	0	0.61	0	0	0.39	0	0	0.81	0	0	0.78	0	0	0.66	0	0	0.4	0	0	0.31	0.66	0.013	-0.01	0.08	0.94	-0.01	0.01	0.35	0.01	0.08	0.9
Xenobiotics	Food Component/Plant	Cinnamoylglycine	38637	709625		HMDB11621	LC/MS Neg	3127	204.067	15.3053	1	0	0.01	0.9	0.01	0	0.13	-0.01	0.01	0.53	0.02	0.01	0.076	0.01	0	0.066	0	0.01	0.75	0.01	0	0.03	0.01	0	0.17	0.01	0.01	0.32	3e-05	0.00082	-0.27	0.3	0.37	0.01	0.12	0.91	-0.15	0.39	0.71
Xenobiotics	Food Component/Plant	Daidzein 7-O-glucuronide	53134				LC/MS Neg	2587	429.082	97.2244	1	.	.	.	.	.	.	.	.	.	.	.	.	.	.	.	.	.	.	.	.	.	.	.	.	.	.	.	.	.	.	.	.	.	.	.	.	.	.
Xenobiotics	Food Component/Plant	Daidzein sulfate (2)	48728				LC/MS Neg	3330	333.008	92.387	1	.	.	.	.	.	.	.	.	.	.	.	.	.	.	.	.	.	.	.	.	.	.	.	.	.	.	.	.	.	.	.	.	.	.	.	.	.	.
Xenobiotics	Food Component/Plant	Dihydroferulic acid	40481	14340			LC/MS Neg	1928	195.066	54.7185	1	0.01	0.01	0.31	-0.03	0.01	0.021	0	0.02	0.98	-0.02	0.02	0.25	-0.01	0.01	0.063	0.01	0.01	0.68	-0.02	0.01	0.021	-0.01	0.01	0.15	-0.01	0.01	0.23	0.00027	1.5e-07	-0.46	0.56	0.4	-0.24	0.33	0.45	0.05	0.92	0.96
Xenobiotics	Food Component/Plant	Dihydroferulic acid sulfate	47915				LC/MS Neg	1372	275.023	77.7161	1	0.02	0.02	0.17	-0.04	0.02	0.01	0	0.02	0.95	-0.06	0.02	0.00066	-0.03	0.01	0.0016	0.01	0.01	0.56	-0.05	0.01	2.5e-05	-0.02	0.01	0.2	-0.04	0.01	0.005	0.011	1.2e-06	0.14	0.67	0.84	-0.61	0.47	0.19	-0.73	0.92	0.43
Xenobiotics	Food Component/Plant	Ergothioneine	37459	3032311	C05570	HMDB03045	LC/MS Pos Early	850	230.096	0	1	0.06	0.03	0.025	0.05	0.01	0.0008	0.08	0.04	0.031	0.05	0.02	0.021	0.06	0.01	9.4e-08	0.07	0.02	0.00054	0.05	0.01	6.1e-05	0.05	0.01	4.2e-05	0.06	0.02	0.0015	0.0015	6.4e-06	2.16	1.08	0.047	0.82	0.42	0.051	2.16	1.43	0.13
Xenobiotics	Food Component/Plant	Erythritol	20699	222285	C00503	HMDB02994	LC/MS Polar	1491	167.056	0.0793	1	0	0.01	0.88	0	0	0.79	0	0	0.55	0	0	0.81	0	0	0.59	0	0	0.41	0	0	0.91	0	0	0.66	0	0	0.89	0.33	0.07	0.18	0.21	0.4	-0.02	0.03	0.53	0	0.14	0.99
Xenobiotics	Food Component/Plant	Eugenol sulfate	48715	180632			LC/MS Neg	3782	243.033	13.5607	1	0	0	0.41	0	0	0.86	0.01	0.01	0.33	0	0	0.092	0	0	0.45	0	0	0.27	0	0	0.13	0	0	0.65	0	0	0.19	0.29	0.096	0.07	0.14	0.58	0	0.12	0.99	-0.18	0.38	0.64
Xenobiotics	Food Component/Plant	Ferulic acid 4-sulfate	47114	6305574		HMDB29200	LC/MS Neg	1200	273.007	73.5131	1	0.02	0.02	0.38	-0.05	0.01	0.0008	0.04	0.02	0.12	-0.05	0.02	0.0034	-0.03	0.01	0.0025	0.02	0.01	0.16	-0.05	0.01	9.8e-06	-0.03	0.01	0.019	-0.03	0.01	0.076	0.01	1.1e-07	-0.15	0.67	0.82	-0.44	0.4	0.27	-0.57	0.98	0.56
Xenobiotics	Food Component/Plant	Ferulylglycine (1)	54936				LC/MS Neg	2239	250.072	95.4005	1	.	.	.	.	.	.	.	.	.	.	.	.	.	.	.	.	.	.	.	.	.	.	.	.	.	.	.	.	.	.	.	.	.	.	.	.	.	.
Xenobiotics	Food Component/Plant	Ferulylglycine (2)	54937				LC/MS Neg	2172	250.072	97.2244	1	.	.	.	.	.	.	.	.	.	.	.	.	.	.	.	.	.	.	.	.	.	.	.	.	.	.	.	.	.	.	.	.	.	.	.	.	.	.
Xenobiotics	Food Component/Plant	Genistein sulfate*	53083				LC/MS Neg	3598.9	349.002	90.0872	2	.	.	.	.	.	.	.	.	.	.	.	.	.	.	.	.	.	.	.	.	.	.	.	.	.	.	.	.	.	.	.	.	.	.	.	.	.	.
Xenobiotics	Food Component/Plant	Gluconate	587	10690	C00257	HMDB00625	LC/MS Polar	2922	195.051	0.3172	1	-0.02	0.02	0.49	-0.01	0.02	0.43	0	0.01	0.99	-0.03	0.01	0.011	-0.01	0	0.17	0	0.01	0.85	-0.02	0.01	0.013	-0.02	0.01	0.23	-0.01	0.01	0.19	0.19	1.6e-07	-0.36	0.77	0.64	-0.9	0.5	0.074	-0.05	0.31	0.87
Xenobiotics	Food Component/Plant	Glucuronide of piperine metabolite C17H21NO3 (5)*	46519				LC/MS Neg	4039	462.178	6.1063	2	0.01	0.01	0.44	0.01	0.01	0.37	0	0.01	0.74	-0.01	0.01	0.17	0	0.01	0.93	0.01	0.01	0.35	0	0.01	0.5	0.01	0.01	0.25	-0.01	0.01	0.3	0.0045	0.0027	-0.22	0.42	0.6	-0.01	0.26	0.96	0.32	0.52	0.54
Xenobiotics	Food Component/Plant	Homostachydrine*	33009	441447	C08283	HMDB33433	LC/MS Pos Early	1750	158.118	0	2	0	0.02	0.99	0.01	0.01	0.39	-0.04	0.02	0.01	0.02	0.02	0.12	0	0.01	0.8	-0.03	0.01	0.011	0.02	0.01	0.086	0	0.01	0.59	-0.01	0.01	0.52	6.9e-09	5.6e-05	-0.92	0.61	0.13	0.32	0.33	0.33	-0.99	0.66	0.14
Xenobiotics	Food Component/Plant	Indolin-2-one	43374	321710	C12312		LC/MS Pos Early	2575	134.06	37.6685	1	-0.03	0.02	0.15	-0.02	0.02	0.25	0	0.02	0.87	-0.01	0.01	0.34	-0.01	0.01	0.18	0	0.01	0.7	-0.01	0.01	0.16	-0.02	0.01	0.056	-0.01	0.01	0.51	0.0085	3.7e-06	-1.01	0.77	0.19	-0.36	0.42	0.4	0.15	0.67	0.83
Xenobiotics	Food Component/Plant	Isoeugenol sulfate	48997				LC/MS Neg	3893	243.033	48.4536	1	0.01	0.01	0.57	-0.01	0.01	0.21	0.01	0.01	0.16	-0.01	0.01	0.42	0	0	0.86	0.01	0.01	0.14	-0.01	0.01	0.18	0	0.01	0.42	0	0.01	0.65	0.62	0.00077	0.07	0.25	0.79	-0.04	0.19	0.83	0.65	0.38	0.092
Xenobiotics	Food Component/Plant	Methyl glucopyranoside (alpha + beta)	46144				LC/MS Neg	1070	193.072	32.4346	1	0	0.01	0.62	0.01	0.01	0.1	-0.02	0.02	0.29	0.01	0	0.011	0.01	0	0.0075	-0.01	0.01	0.18	0.01	0	0.0012	0.01	0	0.18	0.01	0	0.037	5.3e-07	0.0014	-0.77	0.34	0.024	0.17	0.17	0.32	-0.56	0.76	0.46
Xenobiotics	Food Component/Plant	Methyl indole-3-acetate	1584	74706		HMDB29738	LC/MS Neg	4548	188.072	21.8874	1	-0.01	0.01	0.28	-0.02	0.01	0.0041	-0.02	0.01	0.1	-0.01	0	0.056	-0.01	0	0.001	-0.01	0.01	0.096	-0.01	0	0.0051	-0.01	0.01	0.0049	-0.01	0	0.014	0.027	7.3e-05	-0.35	0.24	0.16	-0.39	0.23	0.083	-0.33	0.4	0.42
Xenobiotics	Food Component/Plant	N-(2-furoyl)glycine	31536	21863		HMDB00439	LC/MS Neg	1525	168.03	22.9976	1	0	0.01	0.37	0	0	0.051	0	0	0.52	0	0	0.08	0	0	0.028	0	0	0.42	0	0	0.011	0	0	0.049	0	0	0.16	0.53	0.079	0.15	0.2	0.46	0	0.02	0.98	-0.01	0.06	0.84
Xenobiotics	Food Component/Plant	N-acetylalliin	45404				LC/MS Pos Early	1348	220.064	19.5083	1	0	0	0.38	0.01	0.01	0.017	-0.01	0.01	0.3	-0.01	0.01	0.058	0	0	0.55	0	0	0.27	0	0	0.9	0	0	0.3	-0.01	0	0.079	0.0047	0.16	-0.1	0.12	0.44	-0.03	0.1	0.77	0.14	0.21	0.52
Xenobiotics	Food Component/Plant	N-acetyl-S-allyl-L-cysteine	47136	152467			LC/MS Neg	2237	202.054	76.1301	1	-0.01	0.01	0.46	0.04	0.02	0.039	0	0.02	0.82	0	0.02	0.9	0.01	0.01	0.54	-0.01	0.01	0.64	0.01	0.01	0.27	0.01	0.01	0.3	0	0.01	0.96	7.2e-07	3e-06	-0.3	0.57	0.6	0.68	0.54	0.21	0.9	0.86	0.29
Xenobiotics	Food Component/Plant	Naringenin 7-glucuronide	54924				LC/MS Neg	3144	447.093	93.7351	1	.	.	.	.	.	.	.	.	.	.	.	.	.	.	.	.	.	.	.	.	.	.	.	.	.	.	.	.	.	.	.	.	.	.	.	.	.	.
Xenobiotics	Food Component/Plant	PEG-glycoside, fragment 04*	52876				LC/MS Neg	2306	339.166	62.8073	2	-0.02	0.02	0.36	0	0.01	0.72	0.03	0.03	0.33	0.02	0.02	0.24	0.01	0.01	0.35	0	0.01	0.84	0.01	0.01	0.34	0	0.01	0.89	0.02	0.01	0.11	7.7e-06	2.9e-09	-0.34	0.61	0.57	0.06	0.31	0.86	0.29	1.05	0.78
Xenobiotics	Food Component/Plant	Phytanate	598	26840	C01607	HMDB00801	LC/MS Neg	5908	311.296	0	1	0	0.02	0.91	0.06	0.01	2.6e-07	0.02	0.02	0.37	0.04	0.01	0.015	0.04	0.01	7.7e-08	0.01	0.02	0.39	0.05	0.01	1.7e-07	0.05	0.01	1.2e-06	0.04	0.01	0.0036	0.00011	0.00015	0.8	0.91	0.38	0.92	0.34	0.0076	0.58	1.03	0.58
Xenobiotics	Food Component/Plant	Piperine	33935	638024	C03882	HMDB29377	LC/MS Pos Late	1168	286.144	0.793	1	0	0.01	0.78	0.02	0.01	0.014	0.01	0.01	0.4	-0.01	0.01	0.23	0	0	0.5	0	0.01	0.41	0	0.01	0.77	0.01	0.01	0.046	0	0.01	0.55	0.00085	0.016	-0.48	0.3	0.11	0.21	0.24	0.38	0.22	0.39	0.57
Xenobiotics	Food Component/Plant	Pyrraline	48428	122228		HMDB33143	LC/MS Neg	2304	253.119	9.199	1	0.01	0.01	0.38	0.01	0.01	0.31	0	0.01	0.9	0	0.01	0.63	0	0	0.48	0.01	0.01	0.52	0	0.01	0.69	0.01	0.01	0.15	0	0.01	0.67	0.0032	0.003	0.39	0.44	0.37	-0.08	0.19	0.68	0.13	0.56	0.81
Xenobiotics	Food Component/Plant	Quinate	18335	6508	C00296	HMDB03072	LC/MS Polar	2432.9	191.056	12.3711	1	0.01	0.01	0.35	0	0	0.92	0	0	0.78	0	0	0.82	0	0	0.5	0	0	0.44	0	0	0.74	0	0	0.69	0	0	0.74	0.14	0.0058	0.28	0.23	0.22	0.08	0.05	0.13	-0.27	0.18	0.14
Xenobiotics	Food Component/Plant	Saccharin	21151	5143	D01085	HMDB29723	LC/MS Neg	2000	181.992	40.8406	1	0	0	0.87	0	0	0.81	0	0	0.74	0	0	0.014	0	0	0.073	0	0	0.54	0	0	0.059	0	0	0.84	0	0	0.022	0.92	0.95	-0.02	0.12	0.84	0.05	0.03	0.037	0.16	0.12	0.18
Xenobiotics	Food Component/Plant	S-allylcysteine	43239	98280		HMDB34323	LC/MS Pos Early	2690	162.058	10.5472	1	0	0	0.79	0	0	0.37	0.01	0.01	0.27	-0.01	0	0.24	0	0	0.76	0	0	0.41	0	0	0.65	0	0	0.46	0	0	0.85	0.044	0.0092	-0.1	0.17	0.55	0.05	0.12	0.7	0.27	0.23	0.23
Xenobiotics	Food Component/Plant	Solanidine	39788	65727	C06543	HMDB03236	LC/MS Pos Late	1010	398.342	75.7335	1	0.02	0.02	0.38	0	0.01	0.98	-0.06	0.04	0.09	0	0.02	0.89	0	0.01	0.83	-0.01	0.02	0.59	0	0.01	0.93	0	0.01	0.77	-0.01	0.02	0.54	2.8e-06	1.5e-06	-0.44	0.85	0.6	0.62	0.34	0.073	0.86	1.47	0.56
Xenobiotics	Food Component/Plant	Stachydrine	34384	115244	C10172	HMDB04827	LC/MS Pos Early	1440	144.102	0	1	0	0	0.5	0	0	0.38	0	0	0.29	0	0	0.48	0	0	0.5	0	0	0.12	0	0	0.93	0	0	0.74	0	0	0.25	0.00034	0.052	-0.23	0.09	0.0079	-0.01	0.06	0.85	-0.03	0.19	0.88
Xenobiotics	Food Component/Plant	Sucralose	36649	71485	C12285	HMDB31554	LC/MS Neg	3140	395.007	77.0817	1	0	0.02	0.93	0.02	0.01	0.085	-0.02	0.03	0.52	-0.02	0.02	0.34	0	0.01	0.87	-0.01	0.02	0.7	0.01	0.01	0.6	0.02	0.01	0.13	-0.02	0.02	0.19	4.5e-06	1.5e-05	-0.72	0.81	0.37	0.26	0.36	0.47	-0.67	1.08	0.54
Xenobiotics	Food Component/Plant	Tartarate	15336	444305	C00898	HMDB00956	LC/MS Neg	615.3	149.009	39.0167	1	0	0	0.72	0	0	0.023	0	0	0.89	0	0	0.47	0	0	0.9	0	0	0.72	0	0	0.027	0	0	0.096	0	0	0.89	0.16	0.012	0.02	0.06	0.8	0.02	0.04	0.65	0	0.01	0.86
Xenobiotics	Food Component/Plant	Theanine	22206	439378	C01047	HMDB34365	LC/MS Pos Early	2180	175.108	56.3838	1	-0.01	0.02	0.41	-0.01	0.01	0.33	-0.02	0.03	0.59	0.02	0.02	0.13	0	0.01	0.85	-0.01	0.02	0.44	0	0.01	0.73	-0.01	0.01	0.17	0.01	0.01	0.29	2.8e-06	4.3e-09	-0.28	0.68	0.68	-0.26	0.32	0.41	-0.75	1.25	0.55
Xenobiotics	Food Component/Plant	Thymol sulfate	36095		C09908	HMDB01878	LC/MS Neg	4410	229.054	1.1895	1	0	0	0.56	0	0	0.19	0	0	0.064	0	0	0.27	0	0	0.17	0	0	0.034	0	0	0.8	0	0	0.21	0	0	0.38	0.42	0.023	-0.02	0.06	0.75	0.09	0.04	0.037	0.03	0.05	0.55
Xenobiotics	Food Component/Plant	Umbelliferone sulfate	48674	129659			LC/MS Neg	2440	240.981	42.268	1	0	0	0.15	0	0	0.47	0.01	0	0.25	0	0.01	0.59	0	0	0.38	0	0	0.074	0	0	0.37	0	0	0.55	0	0	0.6	0.75	0.012	-0.01	0.1	0.89	0.11	0.11	0.34	-0.13	0.17	0.45
Xenobiotics	Tobacco Metabolite	2-hydroxyfluorene sulfate	47674				LC/MS Neg	4397	261.023	54.8771	1	0.01	0.02	0.66	-0.04	0.02	0.011	0.03	0.02	0.27	0.01	0.02	0.72	-0.01	0.01	0.48	0.01	0.01	0.34	-0.02	0.01	0.14	-0.02	0.01	0.09	0.01	0.02	0.4	0.00045	2e-08	-0.48	0.6	0.42	0.13	0.45	0.77	1.6	1.01	0.12
Xenobiotics	Tobacco Metabolite	3-hydroxycotinine glucuronide	43470	183115		HMDB01204	LC/MS Neg	1745	367.115	66.2173	1	-0.04	0.02	0.057	-0.05	0.02	0.0076	0.02	0.03	0.58	-0.03	0.02	0.1	-0.04	0.01	0.00068	-0.02	0.02	0.23	-0.04	0.01	0.0018	-0.05	0.02	0.00091	-0.02	0.02	0.22	2.6e-05	1.1e-08	-0.91	0.9	0.31	-0.2	0.57	0.72	1.7	1.14	0.14
Xenobiotics	Tobacco Metabolite	Cotinine	553	854019		HMDB01046	LC/MS Pos Early	2213	177.102	47.1848	1	0	0	0.69	-0.02	0.01	0.045	0	0	0.94	0	0	0.43	0	0	0.75	0	0	0.65	0	0	0.5	0	0	0.74	0	0	0.39	0.2	0.17	-0.04	0.04	0.31	-0.08	0.35	0.82	0.05	0.06	0.37
Xenobiotics	Tobacco Metabolite	Cotinine N-oxide	38662	9815514		HMDB01411	LC/MS Pos Early	1377	193.097	66.0587	1	-0.02	0.03	0.38	-0.03	0.02	0.14	-0.01	0.03	0.79	-0.04	0.02	0.047	-0.03	0.01	0.0042	-0.02	0.02	0.34	-0.04	0.01	0.0052	-0.03	0.02	0.094	-0.03	0.02	0.069	2.8e-05	2e-07	-1.11	1.01	0.27	-0.01	0.57	0.99	0.44	1.22	0.72
Xenobiotics	Tobacco Metabolite	Hydroxycotinine	38661	10219774		HMDB01390	LC/MS Pos Early	2030	193.097	63.4417	1	-0.02	0.02	0.32	-0.03	0.02	0.096	0.03	0.03	0.32	-0.03	0.02	0.083	-0.03	0.01	0.011	-0.01	0.02	0.72	-0.03	0.01	0.0087	-0.03	0.01	0.05	-0.02	0.02	0.25	4.5e-05	1.5e-07	-0.95	0.91	0.29	-0.31	0.52	0.56	0.68	1.29	0.6
Xenobiotics	Xanthine Metabolism	1,3,7-trimethylurate	34404	79437	C16361	HMDB02123	LC/MS Neg	1985	209.068	22.046	1	0	0.01	0.94	-0.01	0.01	0.039	0.01	0.01	0.63	-0.02	0.01	0.013	-0.01	0	0.0082	0	0.01	0.56	-0.02	0	0.0012	-0.01	0.01	0.04	-0.01	0.01	0.066	0.31	0.00033	0.33	0.45	0.47	-0.06	0.14	0.7	-0.08	0.46	0.87
Xenobiotics	Xanthine Metabolism	1,3-dimethylurate	32391	70346		HMDB01857	LC/MS Neg	1671.4	195.052	10.3886	1	0	0	0.82	-0.01	0.01	0.48	0.02	0.02	0.44	0	0.01	0.93	0	0	0.93	0	0	0.86	0	0.01	0.59	0	0	0.66	0	0.01	0.83	0.014	2.4e-05	-0.02	0.15	0.88	-0.15	0.26	0.55	-0.7	0.98	0.47
Xenobiotics	Xanthine Metabolism	1,7-dimethylurate	34400	91611	C16356	HMDB11103	LC/MS Neg	1578.6	195.052	5.7098	1	-0.01	0.02	0.56	-0.02	0.01	0.077	0.02	0.02	0.31	-0.02	0.01	0.12	-0.01	0.01	0.096	0.01	0.01	0.5	-0.02	0.01	0.02	-0.02	0.01	0.059	-0.01	0.01	0.47	0.036	1.4e-06	0.3	0.57	0.59	-0.37	0.26	0.16	0.01	0.73	0.99
Xenobiotics	Xanthine Metabolism	1-methylurate	34395	69726	C16359	HMDB03099	LC/MS Polar	1900	181.037	1.5067	1	0	0.01	0.75	-0.01	0.01	0.091	0	0.01	0.8	-0.01	0.01	0.48	0	0	0.55	0.01	0.01	0.39	-0.01	0.01	0.15	-0.01	0.01	0.18	0	0.01	0.9	0.14	5.6e-06	0.28	0.44	0.52	-0.18	0.21	0.38	-0.09	0.4	0.83
Xenobiotics	Xanthine Metabolism	1-methylxanthine	34389	80220	C16358	HMDB10738	LC/MS Neg	1568.8	165.042	9.8335	1	0	0.01	0.96	-0.01	0.01	0.37	0.04	0.02	0.056	0.01	0.01	0.44	0	0.01	0.58	0.01	0.01	0.23	0	0.01	0.96	0	0.01	0.46	0.01	0.01	0.2	0.023	4.6e-07	0.17	0.43	0.7	-0.34	0.23	0.13	-0.48	0.8	0.55
Xenobiotics	Xanthine Metabolism	3,7-dimethylurate	34399	83126	C16360	HMDB01982	LC/MS Neg	1418.2	195.052	27.5971	1	0.03	0.01	0.023	0	0.01	0.66	0.02	0.01	0.15	0.01	0.01	0.19	0.01	0	0.062	0.03	0.01	0.002	0	0.01	0.62	0	0.01	0.7	0.02	0.01	0.034	0.76	3.5e-07	0.54	0.51	0.29	0	0.16	0.99	0.18	0.55	0.74
Xenobiotics	Xanthine Metabolism	3-methylxanthine	32445	70639	C16357	HMDB01886	LC/MS Neg	1700	165.042	4.2823	1	0	0.01	0.76	0	0.01	0.4	0.02	0.02	0.25	0.01	0.01	0.27	0	0	0.8	0.01	0.01	0.48	0	0	0.99	0	0	0.36	0.01	0.01	0.11	0.019	1.1e-07	0.02	0.43	0.96	-0.17	0.15	0.24	-0.08	0.8	0.92
Xenobiotics	Xanthine Metabolism	5-acetylamino-6-amino-3-methyluracil	34424	88299	C16366	HMDB04400	LC/MS Polar	1710	197.068	6.5821	1	-0.03	0.01	0.052	-0.01	0.01	0.38	0.01	0.01	0.32	0	0.01	0.92	0	0.01	0.77	0	0.01	0.72	0	0.01	0.57	-0.01	0.01	0.1	0	0.01	0.53	0.021	3.7e-07	0.28	0.55	0.61	0.04	0.21	0.84	-0.03	0.54	0.96
Xenobiotics	Xanthine Metabolism	5-acetylamino-6-formylamino-3-methyluracil	34401	108214	C16365	HMDB11105	LC/MS Polar	1424	225.063	25.3767	1	-0.02	0.01	0.11	-0.01	0.01	0.049	0.01	0.01	0.35	0	0.01	0.79	-0.01	0	0.27	0	0.01	0.84	-0.01	0.01	0.14	-0.02	0.01	0.018	0	0.01	0.72	0.04	5e-07	0.26	0.52	0.62	-0.02	0.2	0.94	-0.04	0.57	0.94
Xenobiotics	Xanthine Metabolism	7-methylurate	39598	69160	C16355	HMDB11107	LC/MS Neg	1138	181.037	3.6479	1	0	0.01	0.92	-0.01	0.01	0.15	0	0	0.52	-0.01	0.01	0.5	0	0	0.88	0	0	0.24	-0.01	0	0.17	-0.01	0.01	0.19	0	0	0.55	0.48	4.3e-06	0.02	0.41	0.97	-0.27	0.17	0.11	0.09	0.19	0.65
Xenobiotics	Xanthine Metabolism	7-methylxanthine	34390	68374	C16353	HMDB01991	LC/MS Pos Early	1350	167.056	6.3442	1	0.01	0.01	0.63	0	0.01	0.93	0.02	0.01	0.067	0.01	0.01	0.12	0.01	0	0.053	0.02	0.01	0.038	0.01	0	0.24	0	0	0.81	0.02	0.01	0.018	0.13	2e-07	0.28	0.46	0.54	-0.03	0.15	0.85	0.09	0.5	0.85
Xenobiotics	Xanthine Metabolism	Caffeic acid sulfate	53254			HMDB41708	LC/MS Polar	1307	258.992	55.3529	1	0	0.02	0.8	0	0.01	0.97	0	0.02	0.98	-0.01	0.02	0.33	0	0.01	0.51	0	0.01	0.89	-0.01	0.01	0.5	0	0.01	0.87	-0.01	0.01	0.28	2.1e-05	1.5e-06	-0.69	0.59	0.25	-0.17	0.33	0.61	-0.63	0.96	0.51
Xenobiotics	Xanthine Metabolism	Caffeine	569	2519	C07481	HMDB01847	LC/MS Pos Early	2106	195.088	7.4544	1	0	0.01	0.99	-0.01	0	0.066	-0.01	0.01	0.25	-0.01	0.01	0.026	-0.01	0	0.00082	-0.01	0	0.19	-0.01	0	0.0029	-0.01	0	0.074	-0.01	0	0.0081	0.017	0.011	0.17	0.29	0.57	-0.01	0.1	0.95	-0.23	0.28	0.41
Xenobiotics	Xanthine Metabolism	Paraxanthine	18254	4687	C13747	HMDB01860	LC/MS Neg	2279	179.057	5.9477	1	0.01	0.01	0.57	0	0.01	0.72	0.02	0.02	0.19	-0.01	0.01	0.46	0	0.01	0.87	0.01	0.01	0.2	-0.01	0.01	0.38	0	0.01	1	0	0.01	0.87	0.02	2.4e-05	0.48	0.54	0.37	0.04	0.26	0.87	-0.56	0.8	0.49
Xenobiotics	Xanthine Metabolism	Theobromine	18392	5429	C07480	HMDB02825	LC/MS Pos Early	1600	181.072	2.2205	1	0.02	0.01	0.059	0	0.01	0.68	0.02	0.01	0.21	0.01	0.01	0.24	0.01	0	0.064	0.02	0.01	0.021	0	0	0.32	0.01	0	0.25	0.01	0.01	0.11	0.12	2e-06	0.74	0.4	0.062	-0.03	0.14	0.85	0.34	0.63	0.59
Xenobiotics	Xanthine Metabolism	Theophylline	18394	2153	C07130	HMDB01889	LC/MS Neg	2356.9	179.057	5.1546	1	0	0	0.96	-0.01	0.01	0.47	0.02	0.02	0.31	-0.01	0.01	0.33	0	0	0.84	0	0	0.83	-0.01	0.01	0.23	0	0	0.85	-0.01	0.01	0.57	0.047	0.00058	-0.01	0.08	0.89	-0.16	0.24	0.49	-0.25	0.98	0.8
		X - 07765	46590				LC/MS Neg	3698	245.048	0.1586	4	0	0.01	0.64	0.01	0.01	0.14	0	0.01	0.6	0	0.01	0.63	0.01	0	0.2	0	0.01	0.68	0.01	0.01	0.16	0	0.01	0.42	0.01	0.01	0.37	0.00019	1.8e-05	-0.12	0.34	0.73	0.39	0.2	0.052	-0.22	0.38	0.56
		X - 11261	32578				LC/MS Pos Late	870	286.201	0	4	-0.01	0.02	0.65	0.02	0.02	0.38	-0.03	0.03	0.39	-0.01	0.02	0.68	0	0.01	0.76	-0.01	0.02	0.36	0.01	0.01	0.64	0	0.01	0.74	-0.02	0.02	0.31	4.9e-06	1e-06	0.06	0.69	0.93	1.14	0.45	0.012	-1.34	1.27	0.29
		X - 11299	46592				LC/MS Neg	4886	507.222	0.2379	4	0.01	0.01	0.1	0	0.01	0.91	0	0.01	0.71	0	0.01	0.9	0	0	0.56	0.01	0.01	0.24	0	0	0.96	0	0	0.39	0	0.01	0.97	0.0035	0.00046	0.03	0.31	0.93	-0.02	0.17	0.93	0.32	0.42	0.45
		X - 11308	46390				LC/MS Neg	5163	365.27	0	4	0.04	0.02	0.041	0.02	0.02	0.31	0.05	0.03	0.11	0	0.03	0.94	0.02	0.01	0.036	0.05	0.02	0.0073	0.01	0.02	0.45	0.03	0.01	0.042	0.02	0.02	0.46	9.6e-05	3.1e-06	-0.52	0.83	0.53	-0.39	0.53	0.47	0.09	1.41	0.95
		X - 11315	49592				LC/MS Neg	1157	128.072	2.8549	4	0.03	0.03	0.23	0.09	0.02	1.7e-05	0.11	0.04	0.0084	0.1	0.03	0.00039	0.09	0.01	2.1e-10	0.06	0.02	0.021	0.09	0.02	2.1e-08	0.08	0.02	5.6e-06	0.1	0.02	1.1e-05	7.1e-08	4.7e-07	-1.59	1.1	0.15	0.11	0.6	0.85	-0.07	1.81	0.97
		X - 11372	46594				LC/MS Neg	5319	467.373	0.5551	4	0.05	0.04	0.18	0.06	0.03	0.025	0.09	0.04	0.02	0.05	0.03	0.046	0.06	0.01	2.5e-05	0.07	0.03	0.0033	0.05	0.02	0.0027	0.06	0.02	0.0056	0.06	0.02	0.0032	1.5e-05	2e-05	0.68	1.36	0.62	0.34	0.72	0.64	2.01	1.53	0.19
		X - 11378	46595				LC/MS Neg	5343	445.331	7.9302	4	0.01	0.02	0.58	0	0.02	0.9	0.04	0.02	0.14	-0.01	0.02	0.5	0	0.01	0.72	0.02	0.01	0.13	-0.01	0.01	0.52	0	0.01	0.84	0	0.02	0.82	0.0008	2.5e-06	-0.24	0.73	0.74	-0.58	0.48	0.22	-0.45	1.05	0.67
		X - 11381	46347				LC/MS Neg	1118	184.098	0	4	0.02	0.05	0.66	0.11	0.03	0.00016	0.03	0.06	0.63	0.08	0.04	0.042	0.07	0.02	0.00011	0.02	0.04	0.67	0.09	0.02	5.9e-05	0.08	0.02	0.00042	0.07	0.03	0.036	0.00011	6.7e-06	-0.01	1.73	1	2.14	0.8	0.0082	-2.2	2.52	0.38
		X - 11441	46360				LC/MS Neg	3755.8	331.131	1.3481	4	0	0.01	0.94	0	0.01	0.57	0.01	0.01	0.43	-0.01	0.01	0.22	0	0	0.34	0	0.01	0.45	-0.01	0	0.14	0	0.01	0.59	0	0.01	0.52	0.028	0.00022	0.83	0.31	0.0074	-0.04	0.2	0.85	-0.08	0.39	0.84
		X - 11442	46443				LC/MS Neg	3890	331.13	0.5551	4	0	0.01	0.96	0	0.01	0.6	0.01	0.01	0.49	-0.01	0.01	0.24	0	0	0.34	0	0.01	0.48	-0.01	0	0.15	0	0.01	0.62	0	0.01	0.5	0.02	0.0002	0.85	0.31	0.0072	-0.02	0.21	0.94	-0.08	0.4	0.85
		X - 11444	46460				LC/MS Neg	3972	541.265	0.1586	4	-0.05	0.02	0.027	0.02	0.02	0.44	0.01	0.02	0.7	-0.01	0.02	0.69	0	0.01	0.95	0	0.01	0.82	0	0.01	0.82	-0.01	0.01	0.42	0	0.01	0.86	8.9e-05	1.4e-07	-0.39	0.9	0.67	0.57	0.56	0.31	0.38	0.88	0.66
		X - 11470	46601				LC/MS Neg	4151	525.271	1.1895	4	-0.04	0.02	0.11	0.02	0.01	0.28	0.04	0.04	0.22	0.01	0.02	0.72	0.01	0.01	0.35	0	0.02	1	0.01	0.01	0.29	0	0.01	0.82	0.01	0.02	0.35	2.7e-05	7e-07	-0.67	0.95	0.48	0.38	0.42	0.37	0.82	1.48	0.58
		X - 11478	46602				LC/MS Neg	4285	165.092	0	4	0.01	0.02	0.47	0.03	0.01	0.046	0	0.03	0.86	-0.02	0.02	0.31	0.01	0.01	0.39	0.01	0.02	0.64	0.01	0.01	0.45	0.02	0.01	0.03	-0.02	0.02	0.27	4.8e-05	8.7e-05	-0.56	0.71	0.43	1.24	0.37	0.00079	-1.15	1.17	0.33
		X - 11483	47650				LC/MS Neg	4449	505.208	1.7446	4	0.02	0.01	0.096	0	0.01	0.91	0	0.01	0.79	-0.01	0.01	0.55	0	0	0.87	0.01	0.01	0.23	0	0.01	0.59	0	0.01	0.41	0	0.01	0.57	0.0057	0.00092	0.11	0.37	0.76	0.1	0.18	0.57	0.49	0.5	0.33
		X - 11491	47651				LC/MS Neg	4819	567.319	2.617	4	-0.01	0.01	0.16	-0.01	0.01	0.41	-0.02	0.01	0.14	0	0.01	0.59	-0.01	0	0.02	-0.02	0.01	0.017	-0.01	0.01	0.31	-0.01	0.01	0.12	-0.01	0.01	0.14	3.6e-05	5.4e-05	-0.14	0.31	0.65	0.09	0.21	0.68	-0.9	0.43	0.038
		X - 11522	46914				LC/MS Neg	4760	313.12	0	4	0	0.02	0.83	0	0.02	0.9	0.03	0.02	0.2	-0.01	0.01	0.4	0	0.01	0.68	0.01	0.01	0.31	-0.01	0.01	0.38	0	0.01	0.79	0	0.01	0.83	0.0005	2.6e-06	1.82	0.7	0.01	0.04	0.45	0.92	0.23	0.85	0.79
		X - 11530	46603				LC/MS Neg	4892	313.12	0	4	0	0.02	0.85	0	0.02	0.95	0.02	0.02	0.24	-0.01	0.01	0.29	0	0.01	0.72	0.02	0.01	0.23	-0.01	0.01	0.32	0	0.01	0.92	0	0.01	0.73	0.00095	8e-06	1.82	0.7	0.0099	0.07	0.45	0.87	0.13	0.81	0.88
		X - 11578	49690				LC/MS Neg	4982	459.259	5.7098	4	.	.	.	.	.	.	.	.	.	.	.	.	.	.	.	.	.	.	.	.	.	.	.	.	.	.	.	.	.	.	.	.	.	.	.	.	.	.
		X - 11593	47653				LC/MS Neg	764	189.041	0	4	0	0.03	0.94	0.05	0.02	0.025	-0.05	0.02	0.037	-0.03	0.02	0.1	-0.01	0.01	0.36	-0.03	0.02	0.074	0	0.01	0.92	0.03	0.02	0.044	-0.04	0.01	0.0085	2.1e-06	0.00013	-1.66	0.94	0.081	-0.01	0.57	0.99	-1.8	0.98	0.068
		X - 11612	47431				LC/MS Neg	1633	283.068	93.973	4	.	.	.	.	.	.	.	.	.	.	.	.	.	.	.	.	.	.	.	.	.	.	.	.	.	.	.	.	.	.	.	.	.	.	.	.	.	.
		X - 11787	33132				LC/MS Pos Early	2319	148.097	0	4	-0.06	0.06	0.35	-0.06	0.04	0.18	0.05	0.07	0.52	0.07	0.06	0.2	0	0.03	0.96	0.01	0.05	0.86	0	0.03	0.98	-0.06	0.04	0.074	0.06	0.05	0.15	5.1e-06	4e-09	-6.61	2.34	0.005	-2.86	1.21	0.018	4.23	3.06	0.17
		X - 11795	33140				LC/MS Pos Early	2590	148.097	0.0793	4	-0.02	0.02	0.36	-0.01	0.01	0.58	-0.03	0.01	0.0089	-0.03	0.01	0.016	-0.03	0.01	1.5e-05	-0.03	0.01	0.00046	-0.02	0.01	0.01	-0.01	0.01	0.32	-0.03	0.01	9.6e-05	2.9e-06	0.00054	-0.3	0.61	0.63	0.55	0.32	0.089	-0.96	0.53	0.075
		X - 11843	46466				LC/MS Neg	2674.6	230.013	29.9762	4	0	0	0.17	0	0	0.59	0	0	0.14	0	0	0.82	0	0	0.13	0	0	0.076	0	0	0.53	0	0	0.25	0	0	0.29	0.047	0.03	-0.01	0.06	0.88	-0.1	0.08	0.22	0	0.09	0.98
		X - 11847	46488				LC/MS Neg	3087	259.01	45.7573	4	0	0.01	0.91	0	0	0.063	0	0	0.49	0	0	0.53	0	0	0.066	0	0	0.35	0	0	0.17	0	0	0.033	0	0	0.86	0.44	0.31	-0.04	0.2	0.84	0	0.02	0.86	-0.13	0.16	0.39
		X - 11849	46607				LC/MS Neg	3215	266.018	41.2371	4	-0.01	0.01	0.39	0	0	0.19	0.01	0.01	0.54	0	0	0.93	0	0	0.19	0	0.01	0.99	0	0	0.32	0	0	0.13	0	0	0.94	0.11	0.17	0.53	0.39	0.17	0.01	0.03	0.69	-1.1	0.59	0.063
		X - 11850	46507				LC/MS Neg	3176	226.018	13.1642	4	0	0	0.071	0	0	0.33	0	0	0.18	0	0	0.71	0	0	0.042	0	0	0.035	0	0	0.3	0	0	0.085	0	0	0.24	0.073	0.024	0.02	0.03	0.57	-0.06	0.04	0.14	0	0.04	0.93
		X - 11852	46521				LC/MS Neg	3277.6	232.995	14.3537	4	0	0	0.22	0	0	0.17	0	0	0.35	0	0	0.64	0	0	0.76	0	0	0.88	0	0	0.72	0	0	0.7	0	0	0.92	0.016	0.025	-0.06	0.1	0.53	0.07	0.06	0.29	0.03	0.1	0.79
		X - 11858	47654				LC/MS Neg	4414	437.055	81.364	4	.	.	.	.	.	.	.	.	.	.	.	.	.	.	.	.	.	.	.	.	.	.	.	.	.	.	.	.	.	.	.	.	.	.	.	.	.	.
		X - 11880	46608				LC/MS Neg	5341	537.416	0.1586	4	0.05	0.03	0.074	0.04	0.02	0.084	0.05	0.03	0.13	0.01	0.03	0.66	0.04	0.01	0.0079	0.06	0.02	0.013	0.03	0.02	0.12	0.04	0.02	0.013	0.03	0.02	0.23	1.7e-05	3.6e-06	1.91	1.17	0.1	0.53	0.63	0.4	1.11	1.39	0.43
		X - 12007	46610				LC/MS Neg	1357	222.992	11.5781	4	0	0.01	0.82	-0.01	0	0.045	0	0	0.8	-0.01	0	0.038	0	0	0.094	0	0	0.87	-0.01	0	0.0049	-0.01	0	0.13	0	0	0.19	0.72	0.0012	0.03	0.22	0.91	-0.04	0.13	0.75	-0.05	0.1	0.62
		X - 12013	46611				LC/MS Neg	2066	242.013	34.9722	4	0	0	0.018	-0.01	0	0.077	0	0	0.37	0	0	0.57	0	0	0.0092	0	0	0.016	0	0	0.08	0	0	0.012	0	0	0.28	0.52	0.024	-0.03	0.04	0.47	-0.15	0.08	0.068	0.01	0.08	0.89
		X - 12015	47390				LC/MS Neg	1296	216.088	34.8929	4	0.01	0.01	0.56	0.01	0.01	0.36	0	0.01	0.61	0	0.01	0.96	0	0	0.49	0	0	0.97	0	0.01	0.48	0.01	0.01	0.27	0	0	0.88	0.0072	0.025	-0.21	0.42	0.62	-0.45	0.25	0.075	-0.11	0.26	0.67
		X - 12026	47905				LC/MS Neg	1652	180.053	0.1586	4	-0.1	0.04	0.0082	-0.06	0.03	0.053	-0.06	0.03	0.04	-0.07	0.03	0.018	-0.07	0.01	1.1e-05	-0.06	0.02	0.0019	-0.06	0.02	0.0055	-0.08	0.02	0.0012	-0.07	0.02	0.0006	1e-05	9.7e-09	-1.52	1.31	0.25	-0.96	0.91	0.29	-2.4	1.15	0.038
		X - 12027	47510				LC/MS Neg	2706	242.013	83.5845	4	.	.	.	.	.	.	.	.	.	.	.	.	.	.	.	.	.	.	.	.	.	.	.	.	.	.	.	.	.	.	.	.	.	.	.	.	.	.
		X - 12063	46588				LC/MS Neg	4800	427.214	2.2998	4	0.01	0.01	0.33	0	0.01	0.68	-0.03	0.02	0.21	-0.03	0.01	0.025	-0.01	0.01	0.1	0	0.01	0.87	-0.01	0.01	0.08	0	0.01	1	-0.03	0.01	0.0088	0.0095	0.00064	0.54	0.48	0.26	-0.13	0.2	0.49	0.27	0.96	0.78
		X - 12096	47686				LC/MS Pos Early	2448	174.124	12.4504	4	-0.03	0.02	0.036	-0.04	0.01	0.00083	-0.01	0	0.1	-0.01	0	0.0026	-0.01	0	0.00058	0	0	0.081	-0.01	0	0.00034	-0.04	0.01	4.9e-05	-0.01	0	0.0026	0.65	4.3e-11	-1.35	0.59	0.024	-0.49	0.33	0.13	-0.13	0.13	0.34
		X - 12097	47685				LC/MS Pos Early	2424	174.124	77.0817	4	-0.04	0.02	0.086	-0.03	0.01	0.028	-0.05	0.03	0.12	-0.05	0.02	0.011	-0.04	0.01	2.7e-05	-0.04	0.02	0.014	-0.04	0.01	0.0011	-0.03	0.01	0.0049	-0.05	0.02	0.0019	1e-06	2.8e-07	-1.73	0.77	0.026	-0.35	0.41	0.4	0.26	1.33	0.85
		X - 12100	47687				LC/MS Pos Early	2650	221.092	0	4	-0.1	0.04	0.018	-0.09	0.04	0.017	-0.04	0.02	0.061	-0.08	0.04	0.031	-0.05	0.01	0.00031	-0.04	0.02	0.013	-0.07	0.02	0.0033	-0.09	0.03	0.001	-0.05	0.02	0.0081	0.00016	1.2e-09	-5.26	1.57	0.00094	-1.59	1.05	0.13	-1.61	0.94	0.089
		X - 12101	47642				LC/MS Pos Early	2700	164.074	2.617	4	0.01	0.01	0.49	0	0.01	0.44	-0.02	0.01	0.019	-0.03	0.01	0.0081	-0.01	0	0.0073	-0.01	0.01	0.068	-0.01	0.01	0.046	0	0.01	0.68	-0.03	0.01	0.00027	0.0013	0.028	-1.29	0.43	0.0032	-0.19	0.17	0.27	-0.05	0.41	0.89
		X - 12104	52597				LC/MS Neg	1763	269.077	0.1586	4	-0.06	0.04	0.11	-0.02	0.03	0.59	-0.04	0.03	0.13	-0.04	0.02	0.036	-0.03	0.01	0.014	-0.03	0.02	0.099	-0.03	0.01	0.076	-0.04	0.03	0.13	-0.04	0.01	0.012	4.8e-05	1.5e-08	-2.08	1.42	0.14	-1.17	0.93	0.21	-1.71	1.09	0.12
		X - 12111	52797				LC/MS Neg	877	142.051	84.0603	4	.	.	.	.	.	.	.	.	.	.	.	.	.	.	.	.	.	.	.	.	.	.	.	.	.	.	.	.	.	.	.	.	.	.	.	.	.	.
		X - 12112	47690				LC/MS Pos Early	950	142.086	2.3791	4	-0.01	0.02	0.4	0	0.01	0.53	0.01	0.02	0.57	0	0.01	0.7	0	0	0.47	0	0.01	0.81	0	0	0.53	0	0.01	0.39	0	0.01	0.76	0.0013	2.9e-05	-0.34	0.57	0.55	-0.13	0.15	0.4	-0.49	0.72	0.5
		X - 12117	47695				LC/MS Pos Early	2366	204.134	0.7137	4	-0.07	0.02	0.0016	-0.08	0.02	4e-07	-0.01	0	0.16	-0.01	0	0.0024	-0.01	0	0.00031	0	0	0.13	-0.01	0	0.00023	-0.08	0.01	8.6e-10	-0.01	0	0.0024	0.95	6.1e-16	-1.43	0.74	0.055	-0.9	0.41	0.027	-0.14	0.16	0.36
		X - 12126	46966				LC/MS Neg	1205	324.074	19.0325	4	-0.04	0.01	0.0021	-0.01	0.01	0.29	-0.01	0.01	0.58	-0.02	0.01	0.072	-0.01	0	0.035	-0.01	0.01	0.19	-0.01	0.01	0.081	-0.01	0.01	0.024	-0.01	0.01	0.22	0.006	0.0003	-1.69	0.5	0.00088	-0.16	0.18	0.35	0.16	0.38	0.68
		X - 12127	47702				LC/MS Pos Early	2160	226.082	7.2958	4	0	0.01	0.93	-0.01	0	0.022	-0.01	0.01	0.2	-0.01	0.01	0.24	-0.01	0	0.005	-0.01	0	0.089	-0.01	0	0.021	-0.01	0	0.054	-0.01	0	0.042	0.037	0.046	-0.36	0.2	0.065	-0.15	0.09	0.1	-0.67	0.23	0.0042
		X - 12170	47909				LC/MS Neg	1829	179.047	5.4718	4	0.01	0.02	0.61	0.04	0.02	0.011	0	0.01	0.85	-0.01	0.01	0.34	0.01	0.01	0.22	0	0.01	0.4	0.01	0.01	0.47	0.03	0.01	0.027	0	0.01	0.96	0.00081	0.0033	0.65	0.74	0.38	0.4	0.45	0.38	0.1	0.31	0.75
		X - 12193	46985				LC/MS Neg	2360	201.114	80.9675	4	.	.	.	.	.	.	.	.	.	.	.	.	.	.	.	.	.	.	.	.	.	.	.	.	.	.	.	.	.	.	.	.	.	.	.	.	.	.
		X - 12206	46612				LC/MS Neg	622	254.982	0	4	0.03	0.03	0.43	0.06	0.02	0.0076	-0.04	0.02	0.096	-0.02	0.02	0.27	0	0.01	0.92	-0.02	0.02	0.31	0.01	0.01	0.45	0.05	0.02	0.005	-0.03	0.02	0.059	1.6e-06	0.00012	-1.2	1.22	0.33	-0.15	0.65	0.82	-1.05	0.98	0.29
		X - 12212	46358				LC/MS Neg	3597.7	229.018	11.3402	4	0	0	0.73	0	0	0.47	0.01	0.01	0.4	0	0	0.86	0	0	0.73	0	0	0.41	0	0	0.45	0	0	0.62	0	0	0.84	0.49	0.0023	0.03	0.09	0.77	-0.01	0.03	0.86	-0.05	0.31	0.88
		X - 12216	46613				LC/MS Neg	1691	227.997	0.7137	4	-0.01	0.01	0.3	0.01	0.01	0.18	-0.01	0.01	0.42	-0.01	0.01	0.69	0	0	0.68	0	0.01	0.35	0	0.01	0.51	0	0.01	0.69	-0.01	0.01	0.37	6.4e-05	0.0022	-0.77	0.46	0.091	-0.14	0.25	0.58	0.02	0.27	0.96
		X - 12221	47911				LC/MS Neg	1467	203.998	76.0508	4	0.02	0.02	0.28	-0.03	0.02	0.077	-0.01	0.02	0.68	-0.03	0.02	0.12	-0.02	0.01	0.069	0	0.01	0.77	-0.03	0.01	0.017	-0.01	0.01	0.38	-0.02	0.01	0.13	0.00049	6.8e-07	0	0.77	1	0.5	0.47	0.28	-1.17	0.98	0.24
		X - 12230	46614				LC/MS Neg	3346	217.018	7.6923	4	0	0.01	0.68	0	0	0.29	0.01	0.01	0.14	0	0	0.97	0	0	0.93	0.01	0.01	0.13	0	0	0.72	0	0	0.36	0	0	0.86	0.44	0.0011	0.24	0.37	0.51	0.02	0.11	0.87	0.16	0.35	0.64
		X - 12261	47657				LC/MS Neg	1853	258.008	66.4552	4	-0.01	0.01	0.58	0	0.01	0.86	-0.04	0.02	0.024	0.01	0.02	0.49	0	0.01	0.57	-0.02	0.01	0.085	0.01	0.01	0.63	0	0.01	0.95	-0.01	0.01	0.46	1.6e-06	2.7e-06	-0.12	0.52	0.81	-0.37	0.41	0.37	-0.94	0.82	0.26
		X - 12262	47914				LC/MS Neg	2280	258.008	88.977	4	.	.	.	.	.	.	.	.	.	.	.	.	.	.	.	.	.	.	.	.	.	.	.	.	.	.	.	.	.	.	.	.	.	.	.	.	.	.
		X - 12283	47708				LC/MS Pos Early	2646	245.092	56.1459	4	0	0.01	0.82	0	0.01	0.94	-0.03	0.02	0.15	0	0.02	0.87	0	0.01	0.95	-0.01	0.01	0.66	0	0.01	0.88	0	0.01	0.94	-0.01	0.01	0.68	6.1e-06	4.4e-07	-0.42	0.54	0.44	-0.45	0.34	0.2	-0.1	0.88	0.91
		X - 12306	47917				LC/MS Neg	2350	247.028	69.6273	4	0.02	0.02	0.2	0.04	0.01	0.0058	0.04	0.03	0.14	0.02	0.02	0.13	0.03	0.01	0.00014	0.03	0.01	0.041	0.03	0.01	0.0022	0.03	0.01	0.0021	0.03	0.01	0.034	1.6e-05	5.8e-06	0.1	0.71	0.88	0.95	0.36	0.0086	2.69	1.03	0.0096
		X - 12329	47659				LC/MS Neg	1854	188.003	72.3236	4	-0.03	0.02	0.2	-0.06	0.02	0.00057	0	0.03	0.97	-0.03	0.02	0.24	-0.04	0.01	0.00047	-0.02	0.02	0.21	-0.04	0.01	0.0012	-0.05	0.01	0.00033	-0.02	0.02	0.23	6.3e-05	4.7e-08	-0.64	0.84	0.45	-0.38	0.46	0.42	-0.5	1.08	0.64
		X - 12379	46996				LC/MS Neg	2770	295.131	99.6828	4	.	.	.	.	.	.	.	.	.	.	.	.	.	.	.	.	.	.	.	.	.	.	.	.	.	.	.	.	.	.	.	.	.	.	.	.	.	.
		X - 12407	46615				LC/MS Neg	1873	204.981	97.1451	4	.	.	.	.	.	.	.	.	.	.	.	.	.	.	.	.	.	.	.	.	.	.	.	.	.	.	.	.	.	.	.	.	.	.	.	.	.	.
		X - 12410	47921				LC/MS Neg	2086	274.039	71.0547	4	0	0.02	0.98	-0.01	0.01	0.7	0.04	0.02	0.099	0.01	0.02	0.68	0.01	0.01	0.53	0.01	0.01	0.29	0	0.01	0.99	0	0.01	0.8	0.02	0.02	0.21	6.3e-05	1.1e-08	-0.85	0.64	0.19	-0.02	0.37	0.95	1.65	0.96	0.088
		X - 12411	46616				LC/MS Neg	1037	195.033	6.1856	4	-0.02	0.01	0.0082	-0.02	0.01	0.051	-0.01	0.01	0.17	-0.02	0.01	0.001	-0.02	0	7e-06	-0.02	0.01	0.0035	-0.02	0.01	0.0002	-0.02	0.01	0.002	-0.02	0.01	0.00083	0.03	3.5e-05	0.02	0.19	0.93	-0.2	0.11	0.084	-0.24	0.37	0.51
		X - 12456	47639				LC/MS Neg	4342	427.216	55.4322	4	0.01	0.01	0.46	-0.02	0.01	0.12	-0.06	0.02	0.019	-0.06	0.02	0.00034	-0.03	0.01	0.00021	-0.01	0.01	0.35	-0.04	0.01	0.0003	-0.01	0.01	0.39	-0.06	0.01	1.1e-05	9.8e-05	3e-05	-0.57	0.55	0.29	0	0.34	1	-1.18	0.98	0.23
		X - 12462	46620				LC/MS Pos Early	1790	148.043	0.0793	4	0.03	0.02	0.16	0.01	0.01	0.28	0.04	0.02	0.12	0.01	0.01	0.31	0.02	0.01	0.031	0.03	0.02	0.044	0.01	0.01	0.13	0.02	0.01	0.11	0.02	0.01	0.14	0.00041	9.2e-06	0.49	0.76	0.52	0.39	0.38	0.3	2.34	1.03	0.025
		X - 12472	46628				LC/MS Neg	2528	241.119	1.3481	4	0	0.01	0.9	0	0	0.44	-0.01	0	0.013	-0.01	0	0.0053	-0.01	0	0.0029	-0.01	0	0.047	-0.01	0	0.021	0	0	0.5	-0.01	0	0.00036	0.042	0.26	-0.43	0.22	0.055	-0.05	0.07	0.45	-0.12	0.18	0.48
		X - 12524	46621				LC/MS Neg	5780	205.16	0	4	0.06	0.03	0.019	0.03	0.02	0.063	0	0.04	0.9	0.06	0.03	0.06	0.04	0.01	0.0041	0.03	0.02	0.12	0.04	0.02	0.012	0.04	0.01	0.007	0.03	0.02	0.18	1.5e-05	1.3e-07	1.67	1.05	0.11	-0.2	0.48	0.67	1.78	1.63	0.28
		X - 12543	47922				LC/MS Neg	1409	181.051	53.6875	4	0.01	0.01	0.33	0.01	0.01	0.38	0.02	0.02	0.39	-0.02	0.02	0.25	0.01	0.01	0.42	0.02	0.01	0.14	0	0.01	0.98	0.01	0.01	0.18	-0.01	0.01	0.63	0.00011	3.1e-06	-0.23	0.57	0.69	-0.08	0.31	0.8	0.36	0.93	0.7
		X - 12544	46510				LC/MS Neg	3166.9	209.082	23.0769	4	0	0	0.13	0	0	0.17	0	0	0.78	0	0	0.98	0	0	0.31	0	0	0.33	0	0	0.68	0	0	0.043	0	0	0.93	0.038	0.013	-0.01	0.01	0.53	-0.01	0.03	0.81	0	0.02	0.95
		X - 12680	47437				LC/MS Pos Early	2875	229.129	0.4758	4	0.01	0.01	0.45	0	0.01	0.84	-0.02	0.01	0.2	-0.02	0.01	0.11	-0.01	0.01	0.25	0	0.01	0.62	-0.01	0.01	0.2	0	0.01	0.86	-0.01	0.01	0.081	0.0015	0.00024	0.32	0.57	0.57	-0.11	0.31	0.72	-0.28	0.51	0.59
		X - 12701	46962				LC/MS Neg	1050	319.068	77.954	4	-0.02	0.02	0.42	-0.03	0.02	0.037	0	0.03	0.99	-0.04	0.02	0.025	-0.03	0.01	0.003	-0.01	0.02	0.58	-0.04	0.01	0.0023	-0.03	0.01	0.03	-0.03	0.01	0.033	0.00014	9.5e-08	-0.88	0.75	0.25	-0.07	0.44	0.87	-0.35	1.14	0.76
		X - 12707	47929				LC/MS Neg	1196	249.008	11.7367	4	0.01	0.01	0.43	0	0.02	0.91	0	0.01	0.85	-0.03	0.02	0.082	0	0.01	0.69	0	0.01	0.7	-0.02	0.01	0.17	0.01	0.01	0.61	-0.01	0.01	0.34	0.027	0.00041	0.4	0.46	0.39	-0.57	0.45	0.2	0.03	0.4	0.94
		X - 12712	47931				LC/MS Neg	1644	218.997	56.701	4	0.02	0.02	0.22	-0.01	0.01	0.29	-0.02	0.02	0.39	0.01	0.01	0.56	0	0.01	0.92	0	0.01	0.91	0	0.01	0.81	0	0.01	0.84	0	0.01	0.93	3.1e-05	2e-07	-0.39	0.59	0.51	-0.32	0.34	0.35	0.44	0.88	0.62
		X - 12713	47932				LC/MS Neg	1626	263.023	56.4631	4	0	0.01	0.82	0	0.01	0.72	0	0.02	0.91	-0.03	0.02	0.048	-0.01	0.01	0.23	0	0.01	0.94	-0.01	0.01	0.17	0	0.01	0.66	-0.03	0.01	0.048	9.4e-05	9e-06	0.65	0.54	0.23	0.14	0.38	0.7	-0.61	0.89	0.5
		X - 12714	46318				LC/MS Neg	1617	303.073	59.2387	4	-0.01	0.02	0.7	-0.03	0.01	0.0079	0.03	0.02	0.17	-0.04	0.02	0.017	-0.02	0.01	0.0046	0.01	0.01	0.62	-0.04	0.01	0.00027	-0.02	0.01	0.016	-0.02	0.01	0.13	0.00082	1.9e-08	-0.41	0.62	0.51	-0.4	0.36	0.26	1.04	0.95	0.28
		X - 12718	46973				LC/MS Neg	1750	324.074	11.5781	4	-0.03	0.01	0.027	-0.03	0.01	0.012	0	0	0.56	-0.03	0.01	0.0015	-0.01	0	0.047	0	0	0.56	-0.03	0.01	9.8e-05	-0.03	0.01	0.00026	0	0	0.19	0.67	3.3e-09	-0.95	0.5	0.058	-0.18	0.28	0.53	0.03	0.16	0.86
		X - 12726	47936				LC/MS Neg	1942	233.013	72.0063	4	0.02	0.02	0.27	0.03	0.01	0.036	0.01	0.02	0.72	0	0.02	0.82	0.02	0.01	0.039	0.02	0.01	0.23	0.02	0.01	0.11	0.03	0.01	0.016	0.01	0.01	0.69	7.2e-06	1e-05	1.5	0.7	0.034	0.49	0.37	0.18	2.06	0.9	0.023
		X - 12729	46623				LC/MS Neg	2021	227.997	2.7756	4	-0.01	0.01	0.37	-0.01	0.01	0.28	0	0.01	0.97	0.03	0.02	0.13	0	0.01	0.65	0	0.01	0.65	0	0.01	0.96	-0.01	0.01	0.14	0.01	0.01	0.33	0.0018	7.9e-07	-0.23	0.31	0.47	-0.11	0.29	0.71	-0.38	0.6	0.53
		X - 12730	47937				LC/MS Neg	2048	203.997	82.7121	4	.	.	.	.	.	.	.	.	.	.	.	.	.	.	.	.	.	.	.	.	.	.	.	.	.	.	.	.	.	.	.	.	.	.	.	.	.	.
		X - 12731	47938				LC/MS Neg	2040	238.969	82.7914	4	.	.	.	.	.	.	.	.	.	.	.	.	.	.	.	.	.	.	.	.	.	.	.	.	.	.	.	.	.	.	.	.	.	.	.	.	.	.
		X - 12738	47940				LC/MS Neg	2389	230.997	89.0563	4	.	.	.	.	.	.	.	.	.	.	.	.	.	.	.	.	.	.	.	.	.	.	.	.	.	.	.	.	.	.	.	.	.	.	.	.	.	.
		X - 12739	46626				LC/MS Neg	2406	241.119	1.4274	4	-0.01	0.01	0.47	-0.01	0.01	0.11	-0.01	0.01	0.053	-0.01	0	0.0096	-0.01	0	0.001	-0.01	0.01	0.075	-0.01	0	0.0055	-0.01	0.01	0.08	-0.01	0	0.0023	0.014	0.00022	-1.32	0.42	0.0017	-0.14	0.18	0.43	-0.11	0.3	0.7
		X - 12740	46627				LC/MS Neg	2497	287.023	50.9913	4	0.01	0.02	0.69	0.01	0.01	0.45	0.02	0.02	0.47	0.01	0.01	0.36	0.01	0.01	0.16	0.01	0.01	0.36	0.01	0.01	0.22	0.01	0.01	0.48	0.01	0.01	0.26	6.4e-05	1.2e-07	-0.88	0.64	0.17	0.02	0.32	0.96	1.35	0.98	0.17
		X - 12753	47723				LC/MS Pos Early	1422	220.064	56.7803	4	-0.01	0.01	0.35	0.01	0.01	0.45	0	0.02	0.89	-0.02	0.02	0.2	0	0.01	0.58	-0.01	0.01	0.59	0	0.01	0.7	0	0.01	0.99	-0.01	0.01	0.43	7e-06	2.1e-06	-0.62	0.53	0.24	-0.13	0.36	0.72	2.31	0.85	0.0073
		X - 12798	46624				LC/MS Pos Early	2011	240.102	5.0753	4	0	0.02	0.9	0.03	0.01	0.036	0.03	0.04	0.39	0.04	0.02	0.047	0.03	0.01	0.002	0.02	0.02	0.37	0.03	0.01	0.0033	0.02	0.01	0.051	0.04	0.02	0.025	0.0028	2.1e-07	-0.27	0.93	0.77	0.57	0.4	0.16	0.46	1.54	0.76
		X - 12812	46986				LC/MS Neg	2435	208.062	22.6804	4	0	0.01	0.65	-0.01	0.01	0.26	0	0.01	0.84	-0.01	0.01	0.21	0	0	0.36	0	0	0.71	-0.01	0	0.13	0	0	0.65	0	0.01	0.48	0.14	0.00093	-0.02	0.27	0.95	-0.36	0.2	0.068	-0.16	0.18	0.38
		X - 12816	46630				LC/MS Neg	2700	495.224	69.2308	4	0	0.02	1	0.04	0.01	0.00025	0.03	0.03	0.32	0.02	0.02	0.15	0.03	0.01	0.00016	0.01	0.02	0.54	0.03	0.01	0.0004	0.04	0.01	0.00029	0.03	0.01	0.071	9.1e-06	2.2e-06	1.36	0.84	0.11	0.92	0.33	0.0051	-1.38	1.27	0.28
		X - 12818	47943				LC/MS Neg	2695	263.023	65.1864	4	0.02	0.02	0.3	-0.01	0.01	0.66	-0.01	0.02	0.64	0.01	0.02	0.55	0	0.01	0.67	0.01	0.01	0.66	0	0.01	0.88	0	0.01	0.84	0	0.01	0.77	2.6e-05	6.3e-07	-0.84	0.68	0.22	-0.23	0.36	0.52	-0.15	0.97	0.88
		X - 12822	46997				LC/MS Neg	2790	389.093	1.7446	4	-0.01	0.02	0.72	-0.01	0.02	0.77	0	0.03	0.98	-0.05	0.02	0.047	-0.02	0.01	0.17	0	0.02	0.86	-0.02	0.01	0.1	-0.01	0.02	0.49	-0.03	0.02	0.12	0.00022	7.9e-07	-1.07	0.92	0.25	-0.56	0.55	0.31	-0.9	1.17	0.44
		X - 12830	47662				LC/MS Neg	3197	372.113	38.858	4	0	0.01	0.95	0.01	0.01	0.18	0	0.01	0.73	-0.01	0.01	0.36	0	0	0.74	0	0.01	0.73	0	0.01	0.86	0.01	0.01	0.32	0	0.01	0.54	0.011	0.034	-0.89	0.37	0.018	0.44	0.21	0.04	0.38	0.41	0.36
		X - 12834	47950				LC/MS Neg	3385	279.135	98.9691	4	.	.	.	.	.	.	.	.	.	.	.	.	.	.	.	.	.	.	.	.	.	.	.	.	.	.	.	.	.	.	.	.	.	.	.	.	.	.
		X - 12839	47014				LC/MS Neg	3895	269.152	45.8366	4	0	0.01	0.85	-0.01	0.01	0.45	-0.05	0.01	0.0005	-0.03	0.01	0.008	-0.02	0.01	0.003	-0.02	0.01	0.037	-0.01	0.01	0.025	0	0.01	0.68	-0.04	0.01	5.6e-05	0.013	0.49	-0.56	0.34	0.11	-0.09	0.19	0.64	-0.8	0.61	0.19
		X - 12844	46633				LC/MS Neg	4185	539.249	0.0793	4	-0.01	0.03	0.61	0.03	0.02	0.17	0	0.04	0.91	0.03	0.03	0.28	0.02	0.01	0.082	0.01	0.02	0.57	0.03	0.02	0.076	0.01	0.02	0.45	0.03	0.02	0.23	3.6e-05	8.1e-08	-0.19	1.1	0.86	0.51	0.57	0.37	0.14	1.57	0.93
		X - 12846	46634				LC/MS Neg	4228	481.243	0	4	-0.04	0.03	0.23	0.05	0.03	0.097	0	0.03	0.96	-0.02	0.02	0.32	0	0.01	0.95	0	0.02	0.95	0	0.01	0.95	0.01	0.02	0.67	-0.01	0.01	0.56	2.2e-05	1.1e-06	-1.95	1.14	0.089	1	0.81	0.22	1.22	1.12	0.28
		X - 12847	46364				LC/MS Neg	4247	227.039	7.0579	4	0	0	0.55	0	0	0.88	0	0.01	0.95	0	0	0.85	0	0	0.94	0	0	0.73	0	0	0.98	0	0	0.63	0	0	0.76	0.013	0.00046	-0.18	0.12	0.14	-0.04	0.12	0.72	-0.03	0.2	0.88
		X - 12849	46636				LC/MS Neg	4696	331.176	5.7098	4	0.01	0.01	0.27	0	0.01	0.88	0	0	0.52	-0.01	0.01	0.25	0	0	0.71	0	0	0.25	0	0	0.47	0	0	0.41	0	0	0.92	0.072	0.011	0.07	0.22	0.74	0.15	0.16	0.36	0.11	0.18	0.55
		X - 12851	46639				LC/MS Neg	4844	311.666	22.5218	4	0	0	0.95	0	0	0.28	-0.01	0.01	0.26	0	0	0.3	0	0	0.23	0	0	0.64	0	0	0.17	0	0	0.43	0	0	0.14	0.15	0.32	-0.03	0.06	0.65	-0.08	0.04	0.049	0.04	0.2	0.85
		X - 12879	47954				LC/MS Neg	1115	147.067	45.9159	4	0	0	0.082	0.01	0	0.07	0	0.01	0.99	0	0	0.96	0	0	0.096	0	0	0.13	0	0	0.34	0	0	0.041	0	0	0.9	0.25	0.36	-0.01	0.04	0.74	0.03	0.08	0.72	-0.36	0.27	0.18
		X - 12906	47955				LC/MS Neg	793	158.046	28.9453	4	-0.05	0.02	0.018	0	0.01	0.88	0	0	0.72	-0.02	0.01	0.07	0	0	0.52	0	0	0.82	-0.01	0.01	0.14	-0.01	0.01	0.2	0	0	0.47	0.59	2e-05	-1.66	0.82	0.044	-0.13	0.36	0.72	-0.01	0.15	0.94
		X - 13007	47203				LC/MS Neg	4597	329.234	9.9921	4	0.03	0.01	0.035	0.01	0.01	0.3	0.02	0.02	0.19	0	0.01	0.78	0.01	0.01	0.028	0.03	0.01	0.011	0.01	0.01	0.38	0.02	0.01	0.028	0.01	0.01	0.42	0.0064	4.8e-05	-0.45	0.45	0.33	0.2	0.32	0.55	0.38	0.7	0.58
		X - 13431	47788				LC/MS Pos Late	1015	302.232	34.9722	4	0.01	0.02	0.67	0.03	0.01	0.0068	0.02	0.03	0.42	0.01	0.01	0.62	0.02	0.01	0.014	0.02	0.02	0.33	0.02	0.01	0.041	0.03	0.01	0.0084	0.01	0.01	0.27	0.0025	0.0011	0.76	0.9	0.4	0.57	0.35	0.11	0.54	1.25	0.67
		X - 13435	46733				LC/MS Pos Late	1095	314.232	73.2752	4	-0.01	0.02	0.75	0.02	0.01	0.29	0	0.03	0.99	0.01	0.02	0.69	0.01	0.01	0.46	-0.01	0.02	0.73	0.01	0.01	0.29	0.01	0.01	0.38	0	0.01	0.87	2.2e-06	3.9e-06	-0.19	0.93	0.84	0.27	0.4	0.5	-1.55	1.13	0.17
		X - 13553	47959				LC/MS Neg	1407	263.023	0	4	0	0.02	0.83	-0.04	0.03	0.17	-0.02	0.01	0.064	-0.05	0.02	0.0096	-0.03	0.01	0.00059	-0.02	0.01	0.034	-0.04	0.01	0.0028	-0.02	0.02	0.27	-0.03	0.01	0.0017	0.053	2.7e-07	0.08	0.75	0.92	-0.79	0.66	0.23	-0.74	0.48	0.13
		X - 13658	47664				LC/MS Neg	4643	253.083	51.8636	4	0	0.01	0.91	0	0.01	0.83	-0.01	0.02	0.59	-0.02	0.02	0.25	-0.01	0.01	0.34	-0.01	0.01	0.58	-0.01	0.01	0.45	0	0.01	0.91	-0.02	0.01	0.21	7.2e-05	4.2e-06	-0.56	0.53	0.29	0.25	0.37	0.51	-1.1	0.89	0.22
		X - 13684	47790				LC/MS Pos Early	1642	242.015	0.4758	4	0	0.02	0.96	-0.01	0.01	0.44	-0.03	0.02	0.18	0.01	0.02	0.51	-0.01	0.01	0.33	-0.02	0.01	0.22	0	0.01	0.82	-0.01	0.01	0.46	-0.01	0.01	0.59	1.3e-05	2.9e-07	-0.45	0.66	0.5	0.17	0.34	0.61	0.86	0.84	0.31
		X - 13688	47960				LC/MS Neg	1725	373.115	89.3735	4	.	.	.	.	.	.	.	.	.	.	.	.	.	.	.	.	.	.	.	.	.	.	.	.	.	.	.	.	.	.	.	.	.	.	.	.	.	.
		X - 13689	47774				LC/MS Neg	3665	495.224	59.1594	4	-0.01	0.02	0.4	0	0.01	0.91	0	0.02	0.93	0.01	0.02	0.36	0	0.01	0.65	-0.01	0.01	0.56	0.01	0.01	0.44	0	0.01	0.73	0.01	0.01	0.39	1.3e-06	5.6e-08	-0.21	0.64	0.74	0.5	0.32	0.12	-0.18	0.9	0.84
		X - 13695	47962				LC/MS Neg	2510	245.013	80.3331	4	.	.	.	.	.	.	.	.	.	.	.	.	.	.	.	.	.	.	.	.	.	.	.	.	.	.	.	.	.	.	.	.	.	.	.	.	.	.
		X - 13723	47965				LC/MS Neg	1309	211.062	86.2807	4	.	.	.	.	.	.	.	.	.	.	.	.	.	.	.	.	.	.	.	.	.	.	.	.	.	.	.	.	.	.	.	.	.	.	.	.	.	.
		X - 13726	47967				LC/MS Neg	1532	379.035	67.5654	4	-0.03	0.02	0.08	-0.02	0.01	0.037	-0.02	0.02	0.5	-0.01	0.02	0.48	-0.02	0.01	0.018	-0.03	0.02	0.091	-0.02	0.01	0.068	-0.03	0.01	0.0058	-0.01	0.01	0.41	1.4e-06	3.1e-08	-2.07	0.72	0.0044	0.11	0.34	0.74	1	1.06	0.35
		X - 13728	46645				LC/MS Neg	1589	197.068	6.6614	4	0.02	0.01	0.095	0	0.01	0.67	0.02	0.02	0.12	0	0.01	0.6	0	0	0.26	0.02	0.01	0.0094	0	0	0.96	0	0	0.81	0.01	0.01	0.19	0.44	1.6e-06	0.78	0.45	0.08	-0.1	0.16	0.52	0.33	0.67	0.63
		X - 13729	47971				LC/MS Neg	1745	241.977	5.3132	4	-0.01	0.01	0.29	-0.01	0.01	0.35	0	0.01	0.46	-0.02	0.02	0.21	-0.01	0	0.11	0	0	0.37	-0.02	0.01	0.13	-0.01	0.01	0.1	-0.01	0.01	0.25	0.019	4.3e-06	-1.38	0.52	0.0077	-0.2	0.36	0.58	0.09	0.25	0.72
		X - 13737	47441				LC/MS Pos Early	2332	129.102	1.8239	4	-0.04	0.03	0.23	-0.1	0.04	0.0089	-0.04	0.04	0.3	-0.12	0.04	0.001	-0.07	0.02	4.2e-05	-0.03	0.02	0.13	-0.1	0.02	4.1e-05	-0.07	0.03	0.0056	-0.08	0.03	0.00088	0.0015	1.5e-09	0.62	1.31	0.64	-0.92	1.06	0.39	-0.45	1.5	0.77
		X - 13835	46646				LC/MS Neg	1017	169.062	3.2514	4	-0.01	0.01	0.054	0.01	0.01	0.28	-0.01	0.01	0.052	0	0.01	0.63	-0.01	0	0.087	-0.01	0	0.0098	0	0.01	0.66	0	0.01	0.46	-0.01	0	0.072	7.8e-05	0.0017	-0.16	0.25	0.52	0.12	0.23	0.6	-0.33	0.24	0.18
		X - 13844	47977				LC/MS Neg	1442	209.057	54.8771	4	0.03	0.02	0.12	0.01	0.01	0.26	0.03	0.02	0.24	0.01	0.02	0.62	0.02	0.01	0.04	0.03	0.01	0.046	0.01	0.01	0.24	0.02	0.01	0.073	0.02	0.01	0.25	0.00021	1.1e-07	1.16	0.68	0.089	-0.04	0.32	0.9	-0.44	1.01	0.66
		X - 13846	47978				LC/MS Neg	1433	301.057	94.2902	4	.	.	.	.	.	.	.	.	.	.	.	.	.	.	.	.	.	.	.	.	.	.	.	.	.	.	.	.	.	.	.	.	.	.	.	.	.	.
		X - 13847	47979				LC/MS Neg	1451	383.12	91.1975	4	.	.	.	.	.	.	.	.	.	.	.	.	.	.	.	.	.	.	.	.	.	.	.	.	.	.	.	.	.	.	.	.	.	.	.	.	.	.
		X - 13866	46417				LC/MS Neg	2417.8	253.108	1.0309	4	-0.01	0.01	0.057	0.02	0.01	0.0032	0	0.01	0.99	0	0.01	0.93	0	0	0.71	-0.01	0.01	0.11	0.01	0.01	0.061	0	0.01	0.4	0	0.01	0.72	8.7e-08	0.00058	-0.23	0.29	0.43	0.26	0.24	0.27	0.23	0.53	0.66
		X - 14056	46632				LC/MS Pos Early	810	192.033	0	4	-0.02	0.03	0.53	-0.02	0.02	0.49	0.03	0.05	0.54	0.05	0.03	0.092	0.01	0.02	0.4	0.01	0.03	0.8	0.02	0.02	0.35	-0.02	0.02	0.35	0.04	0.03	0.11	2.4e-05	9e-10	1.37	1.19	0.25	-0.46	0.67	0.49	1.22	2.05	0.55
		X - 14082	47984				LC/MS Neg	4501	511.255	78.9849	4	-0.01	0.03	0.64	-0.01	0.02	0.64	0.01	0.02	0.82	-0.01	0.02	0.57	0	0.01	0.75	0	0.02	0.83	-0.01	0.01	0.53	-0.01	0.01	0.61	0	0.01	0.84	2.4e-05	2.9e-07	1.38	0.97	0.16	-0.25	0.43	0.56	-1.72	1	0.086
		X - 14473	46311				LC/MS Pos Early	2553	211.144	20.1427	4	0.01	0.01	0.32	0.01	0.01	0.21	-0.01	0.01	0.4	-0.02	0.01	0.13	-0.01	0.01	0.34	0	0.01	0.62	0	0.01	0.51	0.01	0.01	0.15	-0.02	0.01	0.052	0.00053	0.031	0.44	0.5	0.37	0.62	0.27	0.025	0.27	0.51	0.6
		X - 14658	46652				LC/MS Neg	4800	288.62	21.0944	4	0	0	0.4	0	0	0.49	0	0	0.0031	0	0	0.12	0	0	0.00013	0	0	0.00012	0	0	0.081	0	0	0.43	0	0	0.00056	0.0066	0.73	-0.02	0.13	0.87	-0.02	0.03	0.46	-0.06	0.02	0.0073
		X - 14662	46656				LC/MS Neg	4336	263.628	21.7288	4	-0.01	0	0.034	0	0	0.11	0	0	0.041	0	0	0.11	0	0	0.00018	-0.01	0	0.00039	0	0	0.03	-0.01	0	0.01	0	0	0.0074	0.0012	0.0025	-0.12	0.13	0.36	0.01	0.08	0.95	-0.19	0.08	0.023
		X - 14904	47204				LC/MS Neg	4543	329.234	17.7637	4	0.03	0.01	0.019	0.01	0.01	0.51	0.01	0.02	0.63	0	0.01	0.95	0.01	0.01	0.19	0.02	0.01	0.067	0	0.01	0.72	0.02	0.01	0.044	0	0.01	0.87	0.0095	0.00096	-0.04	0.48	0.94	0.22	0.31	0.48	0.45	0.76	0.56
		X - 14939	46657				LC/MS Neg	4353	165.092	0	4	0.04	0.02	0.13	0.06	0.02	0.0015	0.03	0.03	0.25	-0.01	0.02	0.76	0.03	0.01	0.0083	0.03	0.02	0.068	0.03	0.01	0.042	0.05	0.01	0.00037	0	0.02	0.85	2.9e-06	3e-05	0.12	0.88	0.89	2.04	0.51	6.6e-05	1.51	1.2	0.21
		X - 15220	46658				LC/MS Neg	2662	274.112	2.617	4	.	.	.	.	.	.	.	.	.	.	.	.	.	.	.	.	.	.	.	.	.	.	.	.	.	.	.	.	.	.	.	.	.	.	.	.	.	.
		X - 15245	46661				LC/MS Neg	568	233.03	0	4	-0.01	0.02	0.53	-0.04	0.02	0.0052	-0.03	0.02	0.24	-0.01	0.01	0.4	-0.02	0.01	0.0014	-0.03	0.01	0.078	-0.02	0.01	0.018	-0.03	0.01	0.0054	-0.02	0.01	0.089	1.3e-05	2.5e-08	0.71	0.69	0.31	-0.91	0.44	0.04	0.18	1.01	0.86
		X - 15461	46283				LC/MS Pos Early	1624	160.097	0.1586	4	-0.01	0.02	0.56	-0.04	0.02	0.04	-0.02	0.02	0.34	-0.01	0.03	0.66	-0.03	0.01	0.016	-0.02	0.02	0.18	-0.03	0.02	0.1	-0.03	0.01	0.029	-0.02	0.02	0.18	0.00014	2.4e-08	-0.88	0.95	0.36	-0.36	0.53	0.5	-0.88	0.79	0.27
		X - 15469	46640				LC/MS Pos Late	785	304.212	2.617	4	-0.04	0.02	0.074	0.03	0.02	0.11	-0.03	0.03	0.34	0.01	0.02	0.48	0	0.01	0.79	-0.04	0.02	0.039	0.02	0.01	0.15	0.01	0.01	0.64	0	0.02	0.77	2e-08	5e-06	-1.42	0.95	0.14	1.18	0.5	0.019	-0.71	1.08	0.51
		X - 15486	46266				LC/MS Neg	3629	269.151	0	4	-0.02	0.02	0.29	0	0.01	0.87	0	0.01	0.93	-0.03	0.02	0.034	0	0.01	0.47	0	0.01	0.96	-0.01	0.01	0.18	0	0.01	0.66	-0.01	0.01	0.42	0.019	2e-06	-0.08	0.66	0.9	0.2	0.37	0.59	0.05	0.36	0.89
		X - 15492	46662				LC/MS Neg	4678	541.265	0.8723	4	-0.09	0.03	0.0066	-0.04	0.02	0.026	0.02	0.04	0.63	-0.04	0.02	0.12	-0.04	0.01	0.0028	-0.03	0.02	0.27	-0.04	0.01	0.0099	-0.05	0.02	0.00089	-0.02	0.02	0.3	5.5e-06	7e-10	-1.81	1.17	0.12	-0.13	0.54	0.81	0.09	1.63	0.96
		X - 15503	46977				LC/MS Neg	1845	193.063	0.3172	4	-0.03	0.02	0.13	-0.01	0.03	0.65	0	0	0.38	-0.03	0.01	0.035	0	0	0.24	0	0	0.39	-0.02	0.01	0.051	-0.02	0.01	0.098	0	0	0.22	0.1	2.9e-08	-1.08	0.52	0.038	-0.84	0.72	0.24	-0.04	0.13	0.75
		X - 15664	46664				LC/MS Neg	3733	469.172	72.4029	4	.	.	.	.	.	.	.	.	.	.	.	.	.	.	.	.	.	.	.	.	.	.	.	.	.	.	.	.	.	.	.	.	.	.	.	.	.	.
		X - 15666	47800				LC/MS Pos Early	2755	221.092	3.1721	4	0.01	0.03	0.77	0	0.02	0.91	-0.04	0.02	0.049	-0.02	0.03	0.55	-0.01	0.01	0.29	-0.02	0.02	0.17	-0.01	0.02	0.67	0	0.01	0.99	-0.03	0.02	0.099	8.2e-06	3.2e-06	0.92	1.05	0.38	0.98	0.5	0.048	-2.6	0.93	0.0058
		X - 15674	46665				LC/MS Neg	1362	187.025	8.6439	4	0.02	0.01	0.094	0.02	0.01	0.0071	-0.01	0.02	0.61	0.04	0.01	0.0029	0.03	0.01	2.3e-05	0.01	0.01	0.33	0.03	0.01	6.6e-05	0.02	0.01	0.00082	0.03	0.01	0.013	1.1e-05	6.3e-07	0.85	0.52	0.1	0.01	0.23	0.96	-1.28	1.02	0.21
		X - 15728	46666				LC/MS Neg	3976	231.033	21.0151	4	0	0	0.59	0	0	0.5	0.02	0.01	0.19	0	0	0.61	0	0	0.25	0	0	0.48	0	0	0.48	0	0	0.3	0	0	0.36	0.16	0.024	0.14	0.08	0.082	0.09	0.07	0.17	-0.06	0.38	0.87
		X - 16087	47988				LC/MS Neg	4143	443.157	3.0135	4	-0.02	0.02	0.31	-0.03	0.01	0.011	-0.02	0.01	0.29	-0.03	0.02	0.12	-0.02	0.01	0.0049	-0.01	0.01	0.19	-0.03	0.01	0.01	-0.03	0.01	0.0072	-0.02	0.01	0.045	0.0019	2.1e-08	-0.54	0.72	0.45	-0.22	0.35	0.54	-0.13	0.62	0.84
		X - 16124	46461				LC/MS Neg	2563.6	203.002	51.705	4	-0.01	0.01	0.57	0	0.01	0.79	0.02	0.02	0.39	0.01	0.02	0.71	0	0.01	0.92	0	0.01	0.72	0	0.01	0.98	-0.01	0.01	0.55	0.01	0.01	0.49	1.5e-05	6.6e-08	0.18	0.54	0.75	-0.73	0.37	0.047	-0.78	0.89	0.38
		X - 16245	46669				LC/MS Neg	4545	287.187	3.1721	4	.	.	.	.	.	.	.	.	.	.	.	.	.	.	.	.	.	.	.	.	.	.	.	.	.	.	.	.	.	.	.	.	.	.	.	.	.	.
		X - 16288	47989				LC/MS Neg	2561	193.051	81.2054	4	.	.	.	.	.	.	.	.	.	.	.	.	.	.	.	.	.	.	.	.	.	.	.	.	.	.	.	.	.	.	.	.	.	.	.	.	.	.
		X - 16343	47275				LC/MS Neg	2064	278.115	95.6384	4	.	.	.	.	.	.	.	.	.	.	.	.	.	.	.	.	.	.	.	.	.	.	.	.	.	.	.	.	.	.	.	.	.	.	.	.	.	.
		X - 16397	47802				LC/MS Pos Early	2809	248.095	19.2704	4	-0.04	0.02	0.075	0.01	0.01	0.62	0	0.02	0.95	-0.02	0.02	0.37	-0.01	0.01	0.55	-0.02	0.01	0.3	0	0.01	0.89	0	0.01	0.73	-0.01	0.01	0.41	5.1e-05	9.2e-06	-0.52	0.79	0.51	0.05	0.36	0.89	-0.18	0.97	0.86
		X - 16570	47013				LC/MS Neg	3765	198.114	1.9033	4	-0.03	0.02	0.11	0.01	0.01	0.32	0.01	0.01	0.59	-0.02	0.02	0.26	0	0.01	0.93	0	0.01	0.94	0	0.01	0.91	0	0.01	0.98	0	0.01	0.73	0.00021	8e-06	0.02	0.6	0.97	0.49	0.35	0.16	-0.02	0.63	0.98
		X - 16576	46673				LC/MS Neg	4496	167.108	36.0825	4	0	0.02	0.8	0	0.01	0.79	0	0.02	0.83	-0.03	0.02	0.15	-0.01	0.01	0.29	0	0.01	0.77	-0.01	0.01	0.28	0	0.01	0.73	-0.01	0.01	0.29	0.0015	0.0018	-0.15	0.65	0.81	-0.02	0.29	0.94	-0.24	0.67	0.72
		X - 16580	47804				LC/MS Pos Early	2537	222.079	0	4	-0.02	0.02	0.33	-0.01	0.01	0.55	-0.02	0.02	0.31	-0.02	0.02	0.2	-0.02	0.01	0.065	-0.02	0.01	0.13	-0.01	0.01	0.25	-0.01	0.01	0.3	-0.02	0.01	0.059	2.4e-05	2.6e-06	-1.81	0.83	0.031	-0.24	0.39	0.54	0.35	0.88	0.69
		X - 16649	47992				LC/MS Neg	3018	353.035	82.3156	4	.	.	.	.	.	.	.	.	.	.	.	.	.	.	.	.	.	.	.	.	.	.	.	.	.	.	.	.	.	.	.	.	.	.	.	.	.	.
		X - 16654	46677				LC/MS Neg	4598	235.118	10.6265	4	0	0.01	0.6	-0.02	0.01	0.0029	-0.01	0.01	0.62	-0.02	0.01	0.031	-0.01	0	0.0045	0	0.01	0.84	-0.02	0.01	0.00036	-0.01	0	0.029	-0.02	0.01	0.032	0.14	0.00099	-0.32	0.28	0.24	-0.3	0.19	0.1	0.04	0.53	0.94
		X - 16935	46681				LC/MS Neg	4471	447.276	0.9516	4	0.01	0.01	0.35	0	0.01	0.72	0.03	0.02	0.11	-0.02	0.02	0.15	0	0.01	0.97	0.02	0.01	0.099	-0.01	0.01	0.25	0	0.01	0.64	-0.01	0.01	0.56	0.0093	7.2e-05	-0.3	0.42	0.48	-0.28	0.33	0.4	0.27	0.74	0.72
		X - 16938	46511				LC/MS Neg	2000	233.103	0	4	.	.	.	.	.	.	.	.	.	.	.	.	.	.	.	.	.	.	.	.	.	.	.	.	.	.	.	.	.	.	.	.	.	.	.	.	.	.
		X - 16944	46683				LC/MS Neg	3718	141.092	6.027	4	0.02	0.02	0.31	0.03	0.02	0.054	-0.01	0.03	0.77	-0.01	0.02	0.49	0.01	0.01	0.35	0.01	0.02	0.67	0.01	0.01	0.35	0.03	0.01	0.029	-0.02	0.02	0.32	2e-05	4.8e-05	-0.48	0.8	0.54	1.49	0.42	0.0004	-0.88	1.32	0.51
		X - 16946	46517				LC/MS Neg	3240	317.115	2.617	4	0	0.01	0.87	-0.01	0.01	0.44	0.01	0.01	0.58	-0.01	0.01	0.063	-0.01	0	0.063	0	0.01	0.66	-0.01	0.01	0.026	-0.01	0.01	0.39	-0.01	0.01	0.17	0.018	7.3e-05	1.04	0.5	0.039	0.03	0.26	0.91	-0.11	0.44	0.81
		X - 17010	47993				LC/MS Neg	3178	189.114	2.4584	4	0.03	0.03	0.27	0.03	0.02	0.2	-0.04	0.05	0.49	-0.03	0.03	0.23	0	0.01	0.96	0.01	0.03	0.69	0	0.02	0.99	0.03	0.02	0.08	-0.04	0.02	0.091	7.4e-06	1.3e-05	0.51	1.14	0.66	1.2	0.63	0.057	3.38	2.19	0.13
		X - 17137	46686				LC/MS Neg	3497	449.203	70.341	4	.	.	.	.	.	.	.	.	.	.	.	.	.	.	.	.	.	.	.	.	.	.	.	.	.	.	.	.	.	.	.	.	.	.	.	.	.	.
		X - 17145	46689				LC/MS Neg	3862	257.176	19.1118	4	0	0.01	0.74	0.01	0	0.0053	0.03	0.02	0.035	0	0	0.95	0.01	0	0.022	0.01	0.01	0.26	0.01	0	0.074	0.01	0	0.0053	0	0	0.62	0.0054	0.073	-0.03	0.26	0.91	0.06	0.12	0.6	0.65	0.65	0.32
		X - 17146	46691				LC/MS Neg	4851	375.181	5.7891	4	0	0.01	0.56	0	0	0.52	0	0.01	0.71	0.01	0.01	0.15	0	0	0.21	0	0.01	0.71	0.01	0	0.13	0	0	0.68	0.01	0.01	0.15	0.00013	2.7e-05	0.39	0.3	0.2	0.12	0.11	0.27	-0.4	0.33	0.22
		X - 17162	47806				LC/MS Pos Late	900	593.333	84.1396	4	.	.	.	.	.	.	.	.	.	.	.	.	.	.	.	.	.	.	.	.	.	.	.	.	.	.	.	.	.	.	.	.	.	.	.	.	.	.
		X - 17185	46490				LC/MS Neg	3079.5	215.002	25.5353	4	0	0.01	0.9	0	0	0.48	0	0.01	0.37	0	0	0.53	0	0	0.66	0	0	0.51	0	0	0.7	0	0	0.44	0	0	0.46	0.25	0.0067	0.05	0.21	0.82	0.02	0.05	0.71	0.19	0.21	0.38
		X - 17269	46704				LC/MS Neg	4538	155.108	80.4917	4	.	.	.	.	.	.	.	.	.	.	.	.	.	.	.	.	.	.	.	.	.	.	.	.	.	.	.	.	.	.	.	.	.	.	.	.	.	.
		X - 17301	47808				LC/MS Pos Early	2911	179.118	66.931	4	-0.01	0.02	0.56	-0.05	0.02	0.016	0	0.03	0.92	-0.04	0.02	0.066	-0.03	0.01	0.0035	-0.01	0.02	0.55	-0.04	0.01	0.0016	-0.03	0.01	0.025	-0.02	0.02	0.13	0.00019	1.2e-07	-0.26	0.91	0.77	0.01	0.53	0.99	0.27	1.09	0.8
		X - 17325	46672				LC/MS Neg	2868	184.098	53.7669	4	0	0.01	0.84	0.01	0.01	0.45	0	0.02	0.96	0.02	0.02	0.22	0.01	0.01	0.28	0	0.01	0.75	0.01	0.01	0.13	0.01	0.01	0.56	0.01	0.01	0.38	2.3e-06	7.2e-08	-0.01	0.55	0.98	0.1	0.32	0.75	0.1	1.03	0.92
		X - 17327	47000				LC/MS Neg	3045	255.136	7.5337	4	0	0.01	0.76	0	0	0.88	-0.01	0	0.06	-0.01	0	0.017	0	0	0.035	0	0	0.2	0	0	0.077	0	0	0.97	-0.01	0	0.0055	0.094	0.091	-0.35	0.27	0.19	-0.06	0.1	0.54	-0.05	0.18	0.78
		X - 17328	47818				LC/MS Pos Late	910	308.185	47.0262	4	0.01	0	0.074	0.01	0	0.12	-0.02	0.01	0.012	0	0	0.86	0	0	0.65	0	0	0.72	0	0	0.65	0.01	0	0.014	0	0	0.5	0.069	0.83	0.06	0.16	0.72	0.07	0.12	0.56	-0.35	0.35	0.32
		X - 17335	47820				LC/MS Pos Late	1052	248.168	48.2157	4	0	0.02	0.96	0	0.02	0.87	-0.03	0.04	0.41	0.03	0.03	0.33	0	0.01	0.71	-0.02	0.02	0.45	0.01	0.01	0.44	0	0.01	0.84	0.01	0.02	0.66	5.3e-06	3.4e-06	-0.92	0.88	0.3	0.3	0.5	0.54	1.7	1.53	0.27
		X - 17337	47821				LC/MS Pos Late	1136	328.248	3.0928	4	-0.04	0.02	0.083	0.02	0.02	0.16	-0.01	0.04	0.8	0.01	0.02	0.79	0	0.01	0.92	-0.04	0.02	0.049	0.01	0.01	0.27	0.01	0.01	0.69	0	0.02	0.89	6.2e-08	6.9e-07	-0.29	0.94	0.76	0.81	0.45	0.072	-1.34	1.41	0.34
		X - 17340	47872				LC/MS Neg	4697	539.25	1.7446	4	-0.02	0.03	0.42	-0.01	0.02	0.5	0.01	0.02	0.66	-0.01	0.02	0.55	0	0.01	0.92	0.01	0.02	0.38	-0.01	0.01	0.45	-0.02	0.02	0.28	0	0.01	0.91	0.0016	3.2e-08	-0.84	0.97	0.39	-0.17	0.52	0.75	0.77	0.91	0.4
		X - 17343	47995				LC/MS Neg	1326	190.966	96.59	4	.	.	.	.	.	.	.	.	.	.	.	.	.	.	.	.	.	.	.	.	.	.	.	.	.	.	.	.	.	.	.	.	.	.	.	.	.	.
		X - 17346	47997				LC/MS Neg	1729	253.083	60.2696	4	0	0.01	0.84	0.02	0.01	0.15	0	0.02	0.84	-0.01	0.02	0.43	0	0.01	0.85	0	0.01	0.92	0	0.01	0.65	0.01	0.01	0.2	-0.01	0.01	0.4	6.6e-06	6.3e-06	0.84	0.57	0.14	-0.02	0.35	0.96	-0.52	0.94	0.58
		X - 17348	46989				LC/MS Neg	2545	247.083	81.0468	4	.	.	.	.	.	.	.	.	.	.	.	.	.	.	.	.	.	.	.	.	.	.	.	.	.	.	.	.	.	.	.	.	.	.	.	.	.	.
		X - 17351	48001				LC/MS Neg	3390	243.078	52.7359	4	0.01	0.01	0.52	0	0.01	0.78	-0.04	0.02	0.044	0	0.02	0.95	0	0.01	0.71	-0.01	0.01	0.62	0	0.01	0.84	0	0.01	0.93	-0.01	0.01	0.37	8.6e-06	1.2e-06	-0.51	0.53	0.34	-0.17	0.34	0.61	0.06	0.91	0.94
		X - 17353	48003				LC/MS Neg	3430	507.209	50.9913	4	0	0.01	0.78	0.01	0.01	0.31	0.08	0.02	0.00033	0.01	0.02	0.54	0.02	0.01	0.015	0.03	0.01	0.011	0.01	0.01	0.25	0.01	0.01	0.3	0.03	0.01	0.016	1.9e-05	3.7e-09	0.46	0.56	0.41	0.73	0.31	0.019	1.56	0.91	0.088
		X - 17354	47009				LC/MS Neg	3520	473.147	76.4473	4	0.01	0.02	0.74	0.01	0.01	0.58	0.02	0.03	0.39	0.01	0.02	0.75	0.01	0.01	0.28	0.01	0.02	0.38	0.01	0.01	0.57	0.01	0.01	0.46	0.01	0.02	0.37	1.5e-05	2.3e-07	-0.57	0.75	0.45	0.62	0.37	0.094	1.06	1.13	0.35
		X - 17357	48009				LC/MS Neg	4098	541.266	0.7137	4	-0.02	0.03	0.44	-0.01	0.02	0.68	0	0.01	0.79	0	0.02	0.98	0	0.01	0.89	0	0.01	0.89	0	0.02	0.91	-0.02	0.02	0.33	0	0.01	0.86	0.00016	9.2e-08	-1.24	0.98	0.21	-0.22	0.55	0.69	0.15	0.51	0.77
		X - 17359	48011				LC/MS Neg	4606	541.266	1.0309	4	-0.04	0.03	0.19	-0.01	0.02	0.68	-0.01	0.02	0.66	-0.02	0.03	0.39	-0.01	0.01	0.42	0	0.01	0.74	-0.02	0.02	0.37	-0.02	0.02	0.24	-0.01	0.02	0.58	0.00023	7.3e-09	-1.26	1.1	0.25	0.86	0.66	0.19	-0.23	0.81	0.78
		X - 17361	48013				LC/MS Neg	4840	331.177	64.9485	4	0.03	0.01	0.066	0	0.01	0.86	0.06	0.02	0.0022	0	0.02	0.88	0.02	0.01	0.034	0.04	0.01	0.00057	0	0.01	0.97	0.01	0.01	0.3	0.02	0.01	0.07	0.0005	4.9e-08	0.7	0.53	0.19	0.3	0.38	0.43	1.11	0.85	0.2
		X - 17365	46976				LC/MS Neg	1785	282.049	83.1879	4	.	.	.	.	.	.	.	.	.	.	.	.	.	.	.	.	.	.	.	.	.	.	.	.	.	.	.	.	.	.	.	.	.	.	.	.	.	.
		X - 17367	46994				LC/MS Neg	2710	182.083	65.1864	4	-0.01	0.01	0.54	0	0.01	0.89	0	0.03	0.88	0	0.02	0.87	0	0.01	0.87	-0.01	0.01	0.58	0	0.01	0.93	0	0.01	0.9	0	0.01	0.8	5.1e-06	4.8e-07	-0.16	0.58	0.79	0.33	0.33	0.31	0.22	1.17	0.85
		X - 17371	48016				LC/MS Neg	3783	452.194	57.2561	4	0	0.01	0.94	0.01	0.01	0.31	0	0.02	0.91	-0.01	0.02	0.44	0	0.01	0.87	0	0.01	0.97	0	0.01	0.9	0.01	0.01	0.37	-0.01	0.01	0.5	6.4e-06	3.4e-06	-1.18	0.58	0.042	0.82	0.33	0.012	0.85	0.93	0.36
		X - 17398	48051				LC/MS Neg	1765	391.035	94.7661	4	.	.	.	.	.	.	.	.	.	.	.	.	.	.	.	.	.	.	.	.	.	.	.	.	.	.	.	.	.	.	.	.	.	.	.	.	.	.
		X - 17438	46705				LC/MS Neg	1950	245.139	4.5202	4	0.07	0.04	0.055	-0.03	0.02	0.22	0.11	0.05	0.024	0	0.02	0.84	0	0.01	0.84	0.09	0.03	0.0026	-0.01	0.01	0.4	-0.01	0.02	0.64	0.01	0.02	0.55	0.00084	6.4e-08	-1.28	1.39	0.36	-0.67	0.64	0.29	2.2	1.91	0.25
		X - 17612	48052				LC/MS Neg	4308	567.319	20.6979	4	0	0.01	0.61	-0.01	0.01	0.49	0	0.02	0.92	-0.03	0.01	0.036	-0.01	0.01	0.089	0	0.01	0.8	-0.01	0.01	0.052	-0.01	0.01	0.37	-0.02	0.01	0.066	0.021	0.011	-0.33	0.32	0.29	-0.41	0.22	0.059	0.41	0.77	0.6
		X - 17653	46707				LC/MS Neg	5128	365.269	7.1372	4	0.06	0.02	0.015	0	0.02	0.97	-0.03	0.03	0.45	-0.04	0.02	0.11	0	0.01	0.83	0.03	0.02	0.16	-0.02	0.01	0.26	0.02	0.01	0.19	-0.03	0.02	0.099	0.00034	8e-05	1.1	0.92	0.23	-0.82	0.53	0.12	-1.39	1.45	0.34
		X - 17654	46709				LC/MS Neg	5200	365.269	1.4274	4	0.04	0.02	0.049	0.01	0.02	0.49	0.04	0.03	0.16	-0.03	0.02	0.16	0.01	0.01	0.32	0.04	0.02	0.013	-0.01	0.02	0.57	0.03	0.01	0.089	-0.01	0.02	0.76	0.001	1.3e-05	-0.24	0.88	0.78	-0.27	0.55	0.63	0.34	1.24	0.79
		X - 17655	48019				LC/MS Neg	4169	421.061	94.3695	4	.	.	.	.	.	.	.	.	.	.	.	.	.	.	.	.	.	.	.	.	.	.	.	.	.	.	.	.	.	.	.	.	.	.	.	.	.	.
		X - 17673	48021				LC/MS Neg	1294	148.973	81.8398	4	.	.	.	.	.	.	.	.	.	.	.	.	.	.	.	.	.	.	.	.	.	.	.	.	.	.	.	.	.	.	.	.	.	.	.	.	.	.
		X - 17676	46970				LC/MS Neg	1485	167.047	12.7676	4	-0.08	0.02	0.00065	-0.05	0.01	0.00033	0.01	0.01	0.54	-0.02	0.01	0.062	-0.01	0.01	0.044	0	0.01	0.83	-0.03	0.01	0.00085	-0.05	0.01	8.3e-07	0	0.01	0.73	0.43	3e-12	-1.39	0.82	0.093	-0.23	0.38	0.54	-0.01	0.36	0.98
		X - 17677	48022				LC/MS Neg	1544	204.982	87.7082	4	.	.	.	.	.	.	.	.	.	.	.	.	.	.	.	.	.	.	.	.	.	.	.	.	.	.	.	.	.	.	.	.	.	.	.	.	.	.
		X - 17685	48025				LC/MS Neg	2575	233.013	41.5543	4	-0.01	0.01	0.082	0	0	0.41	0	0	0.87	0.01	0	0.058	0	0	0.34	0	0	0.86	0	0	0.26	0	0	0.15	0	0	0.077	0.046	3.6e-05	-0.15	0.24	0.54	-0.03	0.09	0.73	0.03	0.14	0.84
		X - 17686	48026				LC/MS Neg	2614	259.028	95.9556	4	.	.	.	.	.	.	.	.	.	.	.	.	.	.	.	.	.	.	.	.	.	.	.	.	.	.	.	.	.	.	.	.	.	.	.	.	.	.
		X - 17689	48028				LC/MS Neg	2806	295.083	96.7486	4	.	.	.	.	.	.	.	.	.	.	.	.	.	.	.	.	.	.	.	.	.	.	.	.	.	.	.	.	.	.	.	.	.	.	.	.	.	.
		X - 17690	46710				LC/MS Neg	2904	245.049	11.1023	4	0	0.01	0.85	0.01	0	0.04	0.01	0.01	0.44	0	0	0.62	0	0	0.37	0	0	0.28	0	0	0.61	0.01	0	0.057	0	0	0.92	0.066	0.1	-0.12	0.23	0.62	0.09	0.09	0.31	-0.08	0.27	0.78
		X - 17692	47001				LC/MS Neg	3070	370.098	87.7875	4	.	.	.	.	.	.	.	.	.	.	.	.	.	.	.	.	.	.	.	.	.	.	.	.	.	.	.	.	.	.	.	.	.	.	.	.	.	.
		X - 17765	48055				LC/MS Neg	4582	489.271	78.1126	4	-0.01	0.02	0.48	0.01	0.02	0.62	-0.02	0.02	0.49	-0.02	0.02	0.18	-0.01	0.01	0.18	-0.02	0.02	0.14	-0.01	0.01	0.43	0	0.01	0.88	-0.02	0.01	0.096	3.7e-06	5.9e-06	-0.38	0.73	0.61	0.14	0.44	0.76	-0.83	1	0.41
		X - 18240	48041				LC/MS Neg	2030	194.046	97.1451	4	.	.	.	.	.	.	.	.	.	.	.	.	.	.	.	.	.	.	.	.	.	.	.	.	.	.	.	.	.	.	.	.	.	.	.	.	.	.
		X - 18249	46366				LC/MS Neg	4404.1	220.942	0.4758	4	0.06	0.03	0.042	0.07	0.02	0.004	0.13	0.06	0.017	0.08	0.03	0.012	0.07	0.02	6.3e-06	0.09	0.03	0.0018	0.07	0.02	0.00027	0.06	0.02	0.00081	0.08	0.03	0.0022	0.0016	2e-07	1.65	1.17	0.16	0.01	0.7	0.98	3.42	2.36	0.15
		X - 18345	47342				LC/MS Neg	1400	245.114	39.9683	4	0	0	0.32	-0.01	0.01	0.36	-0.01	0.01	0.074	0	0	0.34	0	0	0.18	0	0	0.56	0	0	0.2	0	0	0.97	-0.01	0	0.071	0.095	0.2	0.14	0.14	0.3	-0.2	0.16	0.21	0.01	0.27	0.96
		X - 18779	46687				LC/MS Neg	1969	209.045	6.1063	4	.	.	.	.	.	.	.	.	.	.	.	.	.	.	.	.	.	.	.	.	.	.	.	.	.	.	.	.	.	.	.	.	.	.	.	.	.	.
		X - 18838	48046				LC/MS Neg	1756	338.089	63.3624	4	-0.02	0.01	0.25	-0.02	0.02	0.28	-0.03	0.02	0.19	-0.01	0.02	0.71	-0.02	0.01	0.034	-0.02	0.01	0.045	-0.01	0.01	0.3	-0.02	0.01	0.15	-0.02	0.02	0.2	0.0021	2.4e-07	-0.66	0.53	0.21	-0.78	0.48	0.1	-1.86	0.89	0.039
		X - 18886	48047				LC/MS Neg	1870	217.108	11.4195	4	-0.01	0.03	0.59	-0.01	0.02	0.6	-0.01	0.02	0.7	-0.03	0.01	0.024	-0.01	0.01	0.066	0	0.01	0.87	-0.02	0.01	0.038	-0.01	0.01	0.36	-0.02	0.01	0.063	0.0031	9.4e-07	-0.86	0.98	0.38	-0.58	0.53	0.27	0.31	0.79	0.7
		X - 18887	47301				LC/MS Neg	2229	328.152	2.1412	4	-0.05	0.02	0.036	-0.01	0.02	0.53	-0.02	0.02	0.28	-0.04	0.02	0.061	-0.02	0.01	0.0071	-0.02	0.01	0.067	-0.02	0.01	0.068	-0.02	0.01	0.089	-0.03	0.01	0.03	0.00014	1e-06	-2.08	0.86	0.016	-0.24	0.44	0.59	-1.25	0.7	0.074
		X - 18899	47670				LC/MS Neg	3730	337.143	0.3172	4	0.03	0.02	0.11	0.02	0.02	0.2	0.07	0.03	0.016	0.06	0.02	0.0082	0.04	0.01	0.00011	0.05	0.02	0.0034	0.04	0.01	0.0043	0.02	0.01	0.046	0.06	0.02	0.0011	2e-05	7.9e-09	0.8	0.77	0.3	0	0.44	0.99	0.67	1.17	0.57
		X - 18901	46690				LC/MS Neg	3800	211.025	18.0809	4	0.02	0.01	0.089	0.01	0	0.0094	0.03	0.03	0.29	0.01	0.01	0.17	0.01	0	0.00052	0.02	0.01	0.041	0.01	0	0.0042	0.01	0	0.002	0.01	0.01	0.092	0.26	0.0024	0.24	0.37	0.51	0.04	0.06	0.55	1.56	1.15	0.18
		X - 18913	46695				LC/MS Neg	4538	185.118	0	4	0.01	0.02	0.64	0	0.01	0.72	0.01	0.02	0.7	-0.01	0.01	0.52	0	0.01	0.63	0.01	0.01	0.65	-0.01	0.01	0.42	0	0.01	0.99	0	0.01	0.64	0.0005	9.5e-06	0.1	0.73	0.89	0.15	0.35	0.67	-0.26	0.68	0.7
		X - 18914	46368				LC/MS Neg	4503	266.889	1.0309	4	0.05	0.04	0.18	0.12	0.02	4.8e-07	0.08	0.05	0.13	0.07	0.03	0.0063	0.08	0.01	4.1e-08	0.06	0.03	0.065	0.09	0.02	2.3e-07	0.1	0.02	3.1e-07	0.07	0.02	0.0047	0.00039	0.00013	1.87	1.34	0.16	1.1	0.68	0.1	1.27	2.29	0.58
		X - 18921	47671				LC/MS Neg	4870	193.124	0	4	-0.01	0.02	0.47	0.04	0.01	0.0047	0	0.03	0.97	-0.01	0.02	0.63	0.01	0.01	0.36	-0.01	0.02	0.47	0.02	0.01	0.15	0.02	0.01	0.036	-0.01	0.01	0.56	6.9e-07	0.00011	-0.47	0.79	0.56	1.5	0.38	0.0001	-0.68	1.19	0.57
		X - 18922	46700				LC/MS Neg	4928	299.186	1.9033	4	-0.01	0.02	0.62	0	0.02	0.87	0.01	0.03	0.65	-0.07	0.03	0.02	-0.01	0.01	0.21	0	0.02	0.93	-0.02	0.02	0.14	0	0.01	0.79	-0.03	0.02	0.12	0.00017	3.1e-06	-0.05	0.77	0.95	-0.55	0.54	0.32	-0.32	1.22	0.79
		X - 19141	46701				LC/MS Neg	3705	415.197	0.0793	4	-0.03	0.02	0.097	-0.01	0.01	0.36	0	0.01	0.9	-0.02	0.01	0.13	-0.01	0.01	0.28	0	0.01	0.85	-0.01	0.01	0.13	-0.02	0.01	0.084	-0.01	0.01	0.48	0.012	4.9e-07	-0.73	0.77	0.35	-0.63	0.37	0.091	0.07	0.37	0.85
		X - 19183	47672				LC/MS Neg	1665	230.05	84.0603	4	.	.	.	.	.	.	.	.	.	.	.	.	.	.	.	.	.	.	.	.	.	.	.	.	.	.	.	.	.	.	.	.	.	.	.	.	.	.
		X - 19299	47673				LC/MS Neg	3728	227.129	31.3243	4	0	0	0.84	0	0	0.33	0	0	0.48	0	0	0.52	0	0	0.2	0	0	0.59	0	0	0.25	0	0	0.53	0	0	0.26	0.014	0.0094	0.02	0.11	0.89	-0.06	0.1	0.53	-0.01	0.15	0.93
		X - 19438	46261				LC/MS Neg	1209	217.072	3.41	4	-0.01	0.02	0.49	-0.03	0.02	0.098	0.01	0.03	0.8	-0.01	0.02	0.64	-0.02	0.01	0.12	-0.01	0.02	0.76	-0.02	0.01	0.15	-0.02	0.01	0.065	-0.01	0.02	0.64	0.00012	7.8e-09	0.53	0.76	0.48	-0.1	0.47	0.83	1.37	1.22	0.27
		X - 21258	46259				LC/MS Neg	3915	213.023	0.3172	4	0	0.01	0.69	0	0.01	0.55	0.01	0.01	0.63	0	0.01	0.64	0	0	0.37	0	0.01	0.6	0	0	0.47	0	0	0.41	0	0.01	0.52	0.00058	9.9e-05	0.84	0.29	0.0042	0.08	0.15	0.59	0.11	0.47	0.82
		X - 21283	46285				LC/MS Pos Early	2124	126.066	49.7224	4	.	.	.	.	.	.	.	.	.	.	.	.	.	.	.	.	.	.	.	.	.	.	.	.	.	.	.	.	.	.	.	.	.	.	.	.	.	.
		X - 21285	46294				LC/MS Neg	4500	365.143	22.4425	4	0.01	0.02	0.42	0.01	0.01	0.34	-0.03	0.01	0.014	-0.01	0.01	0.6	-0.01	0.01	0.12	-0.02	0.01	0.012	0	0.01	0.96	0.01	0.01	0.23	-0.02	0.01	0.047	2.6e-06	0.023	-0.56	0.64	0.38	0.55	0.33	0.1	-0.5	0.51	0.33
		X - 21286	46295				LC/MS Neg	1550	164.036	1.0309	4	-0.01	0.02	0.62	0	0.01	0.84	-0.03	0.03	0.33	-0.03	0.02	0.13	-0.01	0.01	0.13	-0.01	0.02	0.51	-0.02	0.01	0.2	-0.01	0.01	0.52	-0.03	0.02	0.096	2.4e-05	1.6e-05	-0.62	0.71	0.38	0.3	0.4	0.45	0.61	1.38	0.66
		X - 21295	46316				LC/MS Neg	1526	218.997	26.4076	4	0	0.01	0.5	-0.01	0.01	0.41	0	0	0.78	0	0.01	0.72	0	0	0.49	0	0	0.89	0	0	0.46	0	0	0.8	0	0	0.53	0.044	0.009	-0.22	0.17	0.21	-0.24	0.17	0.16	0.1	0.21	0.64
		X - 21310	46354				LC/MS Neg	2235	233.985	0.2379	4	-0.01	0.04	0.85	-0.01	0.03	0.88	0.03	0.06	0.54	-0.02	0.05	0.72	0	0.02	0.9	0.02	0.03	0.55	-0.01	0.03	0.68	-0.01	0.03	0.7	0	0.04	0.99	3.8e-06	3.5e-08	-0.69	1.51	0.65	1.21	0.95	0.2	2.2	2.45	0.37
		X - 21312	46356				LC/MS Neg	2757.7	243.034	53.6875	4	0	0.01	0.81	0.01	0.01	0.65	0.02	0.02	0.36	0.02	0.02	0.3	0.01	0.01	0.16	0.01	0.01	0.41	0.01	0.01	0.27	0	0.01	0.62	0.02	0.01	0.15	2.1e-05	2.5e-08	-0.26	0.57	0.64	-0.15	0.32	0.63	0.43	0.96	0.65
		X - 21315	46359				LC/MS Neg	3698.1	240.914	57.3354	4	0	0.01	0.83	-0.01	0.02	0.56	0.02	0.02	0.29	0	0.02	0.82	0	0.01	0.63	0.01	0.01	0.33	0	0.01	0.78	0	0.01	0.83	0.01	0.01	0.43	0.00013	5.9e-08	0.53	0.51	0.3	-0.08	0.44	0.86	-0.98	0.88	0.27
		X - 21319	46363				LC/MS Neg	4238.4	165.092	0	4	0.02	0.02	0.39	0.04	0.02	0.0067	0.02	0.03	0.6	-0.01	0.02	0.52	0.02	0.01	0.079	0.01	0.02	0.45	0.02	0.01	0.11	0.04	0.01	0.0036	-0.01	0.02	0.55	1.3e-05	4.2e-05	-0.63	0.9	0.48	1.5	0.42	0.00042	-0.62	1.35	0.65
		X - 21327	46371				LC/MS Neg	4814	329.234	37.7478	4	.	.	.	.	.	.	.	.	.	.	.	.	.	.	.	.	.	.	.	.	.	.	.	.	.	.	.	.	.	.	.	.	.	.	.	.	.	.
		X - 21339	46384				LC/MS Neg	5105	453.323	0.0793	4	0.06	0.02	0.0088	0.01	0.02	0.46	0.06	0.04	0.069	0.01	0.03	0.62	0.03	0.01	0.0083	0.07	0.02	0.00075	0.02	0.01	0.27	0.03	0.01	0.041	0.03	0.02	0.19	0.00031	2.1e-07	1.1	0.93	0.24	0.21	0.49	0.66	0.04	1.51	0.98
		X - 21341	46386				LC/MS Neg	5126	366.901	67.6447	4	0.03	0.01	0.019	-0.01	0.01	0.61	0.06	0.02	0.0029	0.04	0.02	0.015	0.03	0.01	0.0004	0.04	0.01	0.00025	0.02	0.01	0.13	0.01	0.01	0.26	0.05	0.01	0.00025	3.2e-05	8.5e-09	0.72	0.57	0.2	0.02	0.41	0.95	1.08	0.84	0.2
		X - 21349	46394				LC/MS Pos Early	2969	205.079	96.6693	4	.	.	.	.	.	.	.	.	.	.	.	.	.	.	.	.	.	.	.	.	.	.	.	.	.	.	.	.	.	.	.	.	.	.	.	.	.	.
		X - 21353	46398				LC/MS Neg	5196	239.166	0	4	0	0.02	1	0.04	0.02	0.014	-0.03	0.02	0.14	0	0.02	0.92	0	0.01	0.61	-0.02	0.01	0.2	0.02	0.01	0.14	0.02	0.01	0.045	-0.01	0.02	0.38	1.4e-07	9.9e-05	-0.72	0.75	0.34	1.16	0.44	0.0086	-0.29	0.99	0.77
		X - 21364	46409				LC/MS Neg	3757	213.086	0.2379	4	-0.01	0.02	0.37	0.02	0.02	0.31	-0.04	0.03	0.16	-0.02	0.02	0.49	-0.01	0.01	0.25	-0.02	0.01	0.098	0	0.01	0.99	0	0.01	0.94	-0.02	0.02	0.19	4.7e-06	2.6e-06	-1.19	0.62	0.056	0.72	0.55	0.19	0.33	1.2	0.78
		X - 21383	46428				LC/MS Neg	2448	223.098	5.0753	4	-0.02	0.02	0.3	0.01	0	0.13	0	0.02	0.84	-0.02	0.01	0.051	0	0	0.71	-0.01	0.01	0.6	0	0	0.65	0.01	0	0.16	-0.02	0.01	0.085	3.6e-05	0.01	-0.22	0.64	0.73	0.27	0.13	0.041	-0.2	0.73	0.78
		X - 21410	46455				LC/MS Neg	3921	385.17	21.0944	4	0	0.01	0.73	-0.02	0.01	0.066	-0.01	0.01	0.32	-0.01	0.01	0.36	-0.01	0	0.0095	-0.01	0.01	0.14	-0.01	0.01	0.063	-0.01	0.01	0.072	-0.01	0.01	0.097	0.0031	5.9e-05	-0.56	0.44	0.2	0.08	0.28	0.78	-0.14	0.45	0.76
		X - 21411	46456				LC/MS Neg	3956	157.087	0.8723	4	0.01	0.02	0.6	0.03	0.01	0.016	0.06	0.03	0.024	-0.01	0.02	0.69	0.02	0.01	0.031	0.03	0.02	0.064	0.01	0.01	0.16	0.03	0.01	0.014	0.01	0.01	0.55	0.00014	6.2e-05	0.17	0.72	0.81	0.26	0.39	0.51	-0.16	1.22	0.9
		X - 21441	46486				LC/MS Neg	3025.4	294.113	0.793	4	-0.01	0.01	0.28	-0.01	0.01	0.44	0.01	0.01	0.57	-0.03	0.01	0.036	-0.01	0.01	0.048	-0.01	0.01	0.55	-0.02	0.01	0.033	-0.01	0.01	0.26	-0.01	0.01	0.24	0.0033	0.00011	-0.88	0.45	0.053	0.11	0.25	0.67	-0.16	0.58	0.78
		X - 21442	46487				LC/MS Neg	3823	333.208	48.0571	4	-0.01	0.01	0.61	0.01	0	0.029	0.03	0.01	0.042	0.01	0	0.23	0.01	0	0.0019	0.01	0.01	0.15	0.01	0	0.014	0.01	0	0.027	0.01	0	0.058	0.36	0.032	0.86	0.51	0.094	0.18	0.12	0.11	-0.22	0.56	0.69
		X - 21444	46489				LC/MS Neg	3040	300.064	47.5813	4	0	0.01	0.73	-0.02	0.01	0.2	0.04	0.03	0.17	0	0.02	0.85	-0.01	0.01	0.53	0	0.01	0.77	-0.01	0.01	0.37	-0.01	0.01	0.2	0.01	0.01	0.7	0.0037	9.9e-07	-0.37	0.43	0.39	-0.5	0.4	0.21	0.45	1.17	0.7
		X - 21448	46493				LC/MS Neg	3098	317.115	18.0016	4	0	0.02	1	0	0.01	0.73	0	0.01	0.72	-0.02	0.01	0.074	-0.01	0.01	0.092	0	0.01	0.8	-0.01	0.01	0.053	0	0.01	0.71	-0.01	0.01	0.15	0.013	0.00079	1.28	0.55	0.02	0.14	0.27	0.62	-0.09	0.49	0.86
		X - 21458	46503				LC/MS Neg	4010	478.199	35.9239	4	0	0.02	0.98	0	0.01	0.93	0.01	0.02	0.63	-0.02	0.01	0.15	-0.01	0.01	0.23	0	0.01	0.84	-0.01	0.01	0.14	0	0.01	0.93	-0.01	0.01	0.29	0.0062	0.00097	0.91	0.72	0.21	0.44	0.4	0.27	-0.32	0.74	0.67
		X - 21467	46512				LC/MS Neg	4041	262.621	0.2379	4	-0.01	0.02	0.72	-0.03	0.01	0.03	-0.03	0.02	0.15	-0.05	0.02	0.016	-0.03	0.01	0.00053	-0.02	0.01	0.13	-0.04	0.01	0.0021	-0.02	0.01	0.049	-0.05	0.02	0.0022	0.00019	1.4e-05	0.01	0.63	0.99	-0.46	0.38	0.23	-0.86	1	0.39
		X - 21470	46515				LC/MS Neg	3249	232.059	2.2998	4	0	0.01	0.78	-0.01	0.01	0.26	-0.01	0	0.075	-0.01	0.01	0.034	-0.01	0	0.00011	-0.01	0	0.011	-0.01	0	0.0063	-0.01	0.01	0.24	-0.01	0	0.0024	0.02	0.00088	-0.78	0.36	0.032	0.19	0.23	0.4	-0.49	0.19	0.012
		X - 21471	46516				LC/MS Neg	4039	295.112	0.9516	4	-0.01	0.01	0.46	-0.03	0.01	0.0055	-0.03	0.01	0.061	-0.03	0.01	0.0011	-0.03	0.01	4.9e-07	-0.02	0.01	0.013	-0.03	0.01	1.2e-05	-0.02	0.01	0.012	-0.03	0.01	4.9e-05	0.004	1.9e-05	-0.07	0.53	0.9	-0.47	0.3	0.12	-1.17	0.49	0.018
		X - 21607	46674				LC/MS Neg	4529	167.108	2.7756	4	0.01	0.02	0.48	0.01	0	0.095	0.01	0.03	0.73	-0.01	0.02	0.54	0	0	0.17	0.01	0.02	0.45	0	0	0.19	0.01	0	0.085	0	0.02	0.81	7.8e-05	7.4e-06	0.66	0.73	0.37	0.01	0.1	0.9	0.35	1.33	0.79
		X - 21628	46696				LC/MS Neg	2270	697.267	0	4	0.02	0.04	0.52	0.07	0.04	0.061	-0.08	0.06	0.18	-0.06	0.05	0.25	0	0.02	0.83	-0.01	0.03	0.69	0.02	0.03	0.5	0.05	0.03	0.05	-0.08	0.04	0.047	2.5e-06	8.4e-07	-1.6	1.38	0.25	0.56	1.04	0.59	-1.83	2.62	0.49
		X - 21669	46743				LC/MS Neg	4771	445.245	5.5511	4	.	.	.	.	.	.	.	.	.	.	.	.	.	.	.	.	.	.	.	.	.	.	.	.	.	.	.	.	.	.	.	.	.	.	.	.	.	.
		X - 21729	46898				LC/MS Neg	1024	87.0453	0	4	.	.	.	.	.	.	.	.	.	.	.	.	.	.	.	.	.	.	.	.	.	.	.	.	.	.	.	.	.	.	.	.	.	.	.	.	.	.
		X - 21736	46905				LC/MS Neg	3345	183.139	0.3172	4	-0.02	0.01	0.023	-0.01	0.01	0.46	-0.02	0.02	0.28	-0.02	0.01	0.11	-0.02	0.01	0.0063	-0.02	0.01	0.017	-0.01	0.01	0.12	-0.01	0.01	0.05	-0.02	0.01	0.043	3.3e-05	9.8e-05	-0.7	0.41	0.091	-0.43	0.23	0.064	0.24	0.68	0.72
		X - 21737	46906				LC/MS Neg	3461	245.013	55.6701	4	0.01	0.01	0.56	0.02	0.01	0.062	0.01	0.02	0.71	-0.03	0.02	0.14	0	0.01	0.65	0	0.01	0.71	0	0.01	0.81	0.02	0.01	0.058	-0.02	0.01	0.24	3.2e-06	5.5e-05	0.48	0.51	0.35	0.48	0.33	0.15	0.73	0.95	0.44
		X - 21752	46923				LC/MS Neg	5090	621.331	67.0103	4	0.03	0.02	0.051	0.02	0.01	0.15	0	0.02	0.94	0.03	0.02	0.1	0.02	0.01	0.0096	0.02	0.01	0.24	0.02	0.01	0.03	0.02	0.01	0.018	0.02	0.01	0.2	3.3e-06	3.2e-07	-0.73	0.64	0.25	0.11	0.33	0.73	0.25	0.96	0.8
		X - 21788	46964				LC/MS Neg	1165	180.034	31.483	4	0.01	0.02	0.63	0.01	0.02	0.46	-0.01	0.02	0.47	-0.04	0.02	0.049	-0.01	0.01	0.5	0	0.01	0.99	-0.01	0.01	0.29	0.01	0.01	0.41	-0.02	0.01	0.14	0.0023	0.00097	-0.18	0.86	0.84	0.91	0.46	0.05	-0.2	0.77	0.8
		X - 21792	46968				LC/MS Neg	1290	197.083	4.6788	4	-0.03	0.01	0.0046	-0.01	0.01	0.065	-0.02	0.01	0.068	-0.02	0.01	0.022	-0.02	0	2.8e-05	-0.02	0.01	0.0031	-0.02	0.01	0.0027	-0.02	0.01	0.0023	-0.02	0.01	0.005	0.00053	0.00085	-0.54	0.44	0.22	-0.34	0.18	0.062	-0.52	0.5	0.3
		X - 21796	46972				LC/MS Neg	1625	138.057	9.6749	4	0.04	0.04	0.25	0	0.03	0.99	-0.11	0.04	0.0096	-0.07	0.04	0.065	-0.03	0.02	0.078	-0.03	0.03	0.26	-0.03	0.02	0.15	0.01	0.02	0.53	-0.08	0.03	0.0045	6.7e-06	2e-06	2.63	1.28	0.042	0.1	0.84	0.9	-0.93	1.81	0.61
		X - 21803	46980				LC/MS Neg	2035	212.003	60.3489	4	-0.02	0.01	0.13	0.01	0.01	0.54	0.02	0.02	0.28	-0.02	0.02	0.33	0	0.01	0.55	0	0.01	0.79	0	0.01	0.65	-0.01	0.01	0.6	0	0.01	0.79	1.7e-05	3.6e-07	0.12	0.55	0.83	0.51	0.37	0.18	-0.45	0.96	0.64
		X - 21807	46984				LC/MS Neg	2335	233.014	83.5052	4	.	.	.	.	.	.	.	.	.	.	.	.	.	.	.	.	.	.	.	.	.	.	.	.	.	.	.	.	.	.	.	.	.	.	.	.	.	.
		X - 21815	46992				LC/MS Neg	2620	279.1	74.4647	4	0.02	0.01	0.13	0.02	0.01	0.083	-0.01	0.03	0.66	-0.01	0.03	0.81	0.02	0.01	0.044	0.02	0.01	0.13	0.01	0.01	0.22	0.02	0.01	0.017	0	0.02	0.9	2.1e-05	1.7e-07	0.43	0.57	0.45	-0.12	0.34	0.72	-0.76	1.25	0.55
		X - 21816	46993				LC/MS Neg	2655	113.098	81.1261	4	.	.	.	.	.	.	.	.	.	.	.	.	.	.	.	.	.	.	.	.	.	.	.	.	.	.	.	.	.	.	.	.	.	.	.	.	.	.
		X - 21821	46998				LC/MS Neg	2930	243.078	32.5932	4	0	0.01	0.85	0.01	0.01	0.47	0	0	0.65	-0.01	0.01	0.14	0	0	0.95	0	0	0.99	0	0.01	0.62	0	0.01	0.49	0	0	0.62	0.14	0.043	-0.03	0.34	0.94	-0.13	0.21	0.56	0.02	0.12	0.84
		X - 21829	47006				LC/MS Neg	3440	245.14	2.4584	4	.	.	.	.	.	.	.	.	.	.	.	.	.	.	.	.	.	.	.	.	.	.	.	.	.	.	.	.	.	.	.	.	.	.	.	.	.	.
		X - 21830	47007				LC/MS Neg	3455	162.024	82.3156	4	.	.	.	.	.	.	.	.	.	.	.	.	.	.	.	.	.	.	.	.	.	.	.	.	.	.	.	.	.	.	.	.	.	.	.	.	.	.
		X - 21831	47008				LC/MS Neg	3480	363.168	73.5924	4	0	0.02	0.8	-0.01	0.01	0.6	0.03	0.02	0.16	-0.01	0.02	0.64	0	0.01	0.93	0.01	0.01	0.46	-0.01	0.01	0.48	0	0.01	0.64	0.01	0.02	0.65	7e-05	1.3e-07	-0.26	0.64	0.68	0.51	0.34	0.14	1.35	0.98	0.17
		X - 21834	47011				LC/MS Neg	3720	229.018	34.8136	4	0.02	0.01	0.074	0	0.01	0.91	0	0.02	0.84	0.01	0.01	0.23	0.01	0.01	0.14	0.01	0.01	0.21	0.01	0.01	0.38	0.01	0.01	0.36	0.01	0.01	0.21	0.025	0.00031	1.29	0.48	0.0078	0.32	0.23	0.17	0.55	0.68	0.41
		X - 21838	47015				LC/MS Neg	3910	403.105	89.2942	4	.	.	.	.	.	.	.	.	.	.	.	.	.	.	.	.	.	.	.	.	.	.	.	.	.	.	.	.	.	.	.	.	.	.	.	.	.	.
		X - 21839	47016				LC/MS Neg	3925	452.194	51.2292	4	0	0.01	0.88	0.02	0.01	0.11	0.01	0.02	0.8	-0.01	0.02	0.35	0	0.01	0.68	0	0.01	0.97	0	0.01	0.68	0.01	0.01	0.21	-0.01	0.01	0.46	3.3e-06	4.7e-06	-1.22	0.56	0.031	0.74	0.32	0.023	1	0.93	0.29
		X - 21840	47017				LC/MS Neg	3945	347.173	57.2561	4	0.02	0.01	0.13	0.01	0.01	0.37	0.07	0.02	0.00031	0	0.02	0.77	0.02	0.01	0.019	0.04	0.01	0.00055	0	0.01	0.65	0.01	0.01	0.097	0.02	0.01	0.096	0.00022	1.1e-07	0.94	0.55	0.091	0.67	0.33	0.042	1.67	0.84	0.048
		X - 21842	47019				LC/MS Neg	3990	277.022	88.3426	4	.	.	.	.	.	.	.	.	.	.	.	.	.	.	.	.	.	.	.	.	.	.	.	.	.	.	.	.	.	.	.	.	.	.	.	.	.	.
		X - 21845	47022				LC/MS Neg	4085	356.119	44.0127	4	0	0.01	0.67	0.01	0.01	0.3	0.01	0.01	0.5	-0.01	0.01	0.51	0	0	0.63	0.01	0.01	0.49	0	0.01	0.89	0.01	0.01	0.3	0	0.01	0.72	0.013	0.02	-0.85	0.37	0.021	0.48	0.23	0.036	0.57	0.52	0.28
		X - 21851	47028				LC/MS Neg	4440	509.277	42.9025	4	-0.02	0.01	0.077	0.01	0.01	0.33	0.01	0.02	0.68	-0.01	0.02	0.49	0	0.01	0.99	-0.01	0.01	0.48	0	0.01	0.68	0	0.01	0.89	0	0.01	0.9	0.00033	0.00011	-1.18	0.52	0.023	0.05	0.29	0.87	-0.06	0.73	0.93
		X - 22143	47389				LC/MS Neg	1263	216.088	34.4171	4	0	0.02	1	-0.01	0.01	0.28	-0.01	0.01	0.3	0	0	0.12	0	0	0.13	0	0	0.54	0	0	0.14	-0.01	0.01	0.32	0	0	0.085	0.16	0.00081	-0.47	0.47	0.32	-0.69	0.29	0.02	-0.17	0.21	0.43
		X - 22162	47417				LC/MS Pos Early	960	150.058	0	4	-0.02	0.04	0.55	-0.01	0.03	0.64	-0.02	0.04	0.69	-0.09	0.03	0.0014	-0.04	0.02	0.0081	-0.02	0.03	0.49	-0.05	0.02	0.012	-0.01	0.02	0.48	-0.08	0.02	0.0014	2.1e-06	3.8e-06	-2.2	1.34	0.1	-1.22	0.72	0.088	-0.79	1.83	0.67
		X - 22508	47772				LC/MS Neg	1758	324.073	53.3703	4	-0.03	0.01	0.027	-0.02	0.01	0.074	0.01	0.02	0.81	-0.03	0.02	0.049	-0.02	0.01	0.0018	-0.02	0.01	0.19	-0.03	0.01	0.0091	-0.03	0.01	0.0032	-0.02	0.01	0.11	3.6e-05	1.9e-08	-1.04	0.55	0.062	0.2	0.34	0.57	1.92	0.98	0.053
		X - 22509	47773				LC/MS Neg	3562	473.146	68.2791	4	-0.01	0.02	0.65	0.02	0.01	0.059	0.03	0.03	0.21	0	0.02	0.88	0.01	0.01	0.12	0.01	0.01	0.51	0.01	0.01	0.25	0.02	0.01	0.11	0.01	0.01	0.55	9.2e-06	1.7e-06	-1	0.71	0.16	0.48	0.35	0.17	1.03	1.03	0.32
		X - 22520	47784				LC/MS Neg	4389	263.628	45.9159	4	-0.01	0.01	0.18	-0.02	0.01	0.0011	0	0.01	0.69	-0.01	0	0.0047	-0.01	0	1.4e-05	-0.01	0	0.22	-0.02	0	2e-05	-0.02	0	0.00044	-0.01	0	0.0053	0.44	0.00095	-0.35	0.31	0.26	-0.1	0.16	0.53	-0.19	0.43	0.65
		X - 22764	48067				LC/MS Neg	5263	197.155	0	4	0	0.02	0.88	0.02	0.01	0.054	-0.06	0.03	0.059	-0.02	0.02	0.24	0	0.01	0.73	-0.02	0.01	0.21	0	0.01	0.82	0.01	0.01	0.14	-0.03	0.02	0.09	3.2e-06	0.00096	0.05	0.62	0.94	0.93	0.36	0.011	-0.52	1.14	0.65
		X - 22771	48076				LC/MS Neg	2180	160.044	10.0714	4	.	.	.	.	.	.	.	.	.	.	.	.	.	.	.	.	.	.	.	.	.	.	.	.	.	.	.	.	.	.	.	.	.	.	.	.	.	.
		X - 22775	48080				LC/MS Neg	2980	154.991	0.6344	4	.	.	.	.	.	.	.	.	.	.	.	.	.	.	.	.	.	.	.	.	.	.	.	.	.	.	.	.	.	.	.	.	.	.	.	.	.	.
		X - 22776	48081				LC/MS Neg	3615	252.044	41.7922	4	0.03	0.02	0.11	-0.01	0.01	0.66	-0.03	0.03	0.27	-0.04	0.02	0.044	-0.01	0.01	0.27	0.01	0.02	0.75	-0.02	0.01	0.16	0	0.01	0.77	-0.04	0.02	0.019	0.0029	0.0022	-0.65	0.84	0.44	-0.45	0.37	0.22	1.3	1.16	0.26
		X - 22834	48185				LC/MS Neg	5095	448.308	63.7589	4	-0.01	0.02	0.72	-0.02	0.01	0.048	0.03	0.02	0.22	-0.03	0.02	0.054	-0.02	0.01	0.048	0.01	0.01	0.37	-0.03	0.01	0.0054	-0.02	0.01	0.038	-0.01	0.01	0.31	0.00054	1.2e-07	-0.76	0.6	0.21	-0.33	0.34	0.33	0.34	0.96	0.73
		X - 23047	48572				LC/MS Neg	4202	273.171	2.0619	4	.	.	.	.	.	.	.	.	.	.	.	.	.	.	.	.	.	.	.	.	.	.	.	.	.	.	.	.	.	.	.	.	.	.	.	.	.	.
		X - 23157	48771				LC/MS Neg	4276	567.318	64.9485	4	-0.03	0.02	0.06	-0.03	0.01	0.018	-0.02	0.03	0.41	0.01	0.02	0.44	-0.02	0.01	0.048	-0.03	0.01	0.05	-0.01	0.01	0.32	-0.03	0.01	0.002	0	0.01	0.81	3.8e-07	1.2e-09	-0.29	0.63	0.65	0.02	0.32	0.96	-1.61	1.1	0.14
		X - 23159	48773				LC/MS Neg	4548	235.117	53.2117	4	-0.02	0.01	0.14	-0.02	0.01	0.044	-0.02	0.02	0.49	-0.03	0.02	0.046	-0.02	0.01	0.00078	-0.02	0.01	0.11	-0.03	0.01	0.0056	-0.02	0.01	0.011	-0.03	0.01	0.022	9.3e-06	1.6e-06	-1.01	0.53	0.059	-0.33	0.32	0.3	-1.05	0.95	0.27
		X - 23160	48774				LC/MS Neg	4095	471.242	45.9952	4	-0.02	0.01	0.066	-0.01	0.01	0.1	-0.01	0.01	0.63	-0.01	0.01	0.27	-0.01	0	0.0089	-0.01	0.01	0.049	-0.01	0	0.063	-0.01	0	0.021	-0.01	0.01	0.16	0.0028	0.0029	-0.07	0.32	0.83	-0.05	0.15	0.76	-0.44	0.47	0.35
		X - 23196	48892				LC/MS Neg	1392	217.108	40.4441	4	0	0.02	0.86	-0.03	0.01	0.019	0	0.02	0.98	-0.02	0.02	0.26	-0.02	0.01	0.043	0	0.01	0.97	-0.02	0.01	0.015	-0.03	0.01	0.017	-0.01	0.01	0.43	0.053	7.7e-07	0.02	0.9	0.98	-0.64	0.38	0.094	0.44	0.81	0.59
		X - 23276	48972				LC/MS Neg	4957.5	329.233	68.2791	4	0.02	0.02	0.36	0	0.01	0.74	0.01	0.02	0.71	0.01	0.02	0.35	0.01	0.01	0.42	0.01	0.01	0.45	0.01	0.01	0.55	0	0.01	0.7	0.01	0.01	0.54	2.8e-05	4.9e-07	0.35	0.61	0.56	0.49	0.39	0.2	2.3	0.96	0.018
		X - 23294	48993				LC/MS Neg	4856	169.123	49.5638	4	-0.01	0.02	0.52	0	0.02	0.79	0.02	0.03	0.51	0.01	0.02	0.54	0	0.01	0.75	0	0.02	0.99	0	0.01	0.74	-0.01	0.01	0.61	0.01	0.02	0.43	0.00026	2.6e-06	0.36	0.71	0.61	0.01	0.44	0.98	-0.58	1.35	0.67
		X - 23295	48994				LC/MS Neg	4807	169.123	0.2379	4	-0.01	0.02	0.63	0.02	0.01	0.11	-0.07	0.03	0.055	-0.01	0.02	0.64	0	0.01	0.95	-0.03	0.02	0.11	0.01	0.01	0.45	0.01	0.01	0.21	-0.02	0.01	0.22	5e-07	0.00028	-1.14	0.72	0.11	0.39	0.31	0.22	-2.29	1.32	0.084
		X - 23297	48996				LC/MS Neg	4976	169.123	1.3481	4	0	0.02	0.94	0.04	0.02	0.011	-0.03	0.03	0.43	0.01	0.03	0.69	0.02	0.01	0.099	-0.01	0.02	0.63	0.03	0.01	0.037	0.03	0.01	0.034	0	0.02	0.86	6.7e-07	2.8e-06	-0.71	0.75	0.34	1.37	0.44	0.0019	-0.33	1.43	0.82
		X - 23314	49014				LC/MS Neg	1578.3	207.087	9.0404	4	0	0	0.25	0	0	0.29	0	0	0.35	0	0	0.9	0	0	0.39	0	0	0.8	0	0	0.41	0	0	0.15	0	0	0.61	0.0047	0.29	-0.12	0.12	0.33	0.02	0.03	0.5	0.01	0.13	0.96
		X - 23369	49228				LC/MS Neg	2150	188.035	6.9786	4	0.01	0.02	0.62	0.01	0.02	0.43	-0.02	0.02	0.43	0	0.02	0.88	0	0.01	0.63	0	0.02	0.91	0	0.01	0.69	0.01	0.01	0.38	-0.01	0.02	0.71	2.1e-05	2.7e-05	0.6	0.88	0.5	0.27	0.43	0.53	0.26	1.03	0.8
		X - 23583	49459				LC/MS Pos Early	1112	116.071	62.728	4	0.01	0.01	0.42	0	0.01	0.74	0.04	0.03	0.14	-0.02	0.02	0.2	0	0.01	0.73	0.02	0.01	0.12	-0.01	0.01	0.59	0.01	0.01	0.44	-0.01	0.01	0.66	0.00032	2.2e-06	0.76	0.57	0.18	-0.25	0.32	0.44	-0.8	1.16	0.49
		X - 23585	49461				LC/MS Pos Early	1378	118.086	2.5377	4	0.02	0.01	0.1	0	0.01	0.58	0.01	0.01	0.67	0.01	0.01	0.58	0.01	0.01	0.21	0.01	0.01	0.22	0.01	0.01	0.42	0.01	0.01	0.18	0	0.01	0.64	0.00099	0.00021	0.57	0.38	0.14	-0.27	0.24	0.26	-0.31	0.57	0.59
		X - 23587	49463				LC/MS Pos Early	1230	132.102	7.9302	4	0.01	0.01	0.2	0	0.01	0.61	0	0.01	0.49	0	0.01	0.57	0	0	0.56	0	0	0.22	0	0	0.95	0	0	0.26	0	0	0.93	0.013	0.0087	-0.18	0.2	0.35	0.18	0.18	0.32	-0.02	0.24	0.93
		X - 23588	49464				LC/MS Pos Early	1380	403.134	88.184	4	.	.	.	.	.	.	.	.	.	.	.	.	.	.	.	.	.	.	.	.	.	.	.	.	.	.	.	.	.	.	.	.	.	.	.	.	.	.
		X - 23593	49469				LC/MS Pos Early	1531	191.102	0	4	0.03	0.04	0.46	-0.06	0.04	0.096	-0.07	0.04	0.077	-0.13	0.04	0.0016	-0.07	0.02	0.0004	-0.03	0.03	0.17	-0.09	0.03	0.00044	-0.03	0.03	0.34	-0.1	0.03	0.00024	4.5e-05	4.7e-08	-2.29	1.47	0.12	-1.56	1.03	0.13	-1.24	1.55	0.42
		X - 23637	49513				LC/MS Pos Early	1382	235.092	1.586	4	0.04	0.04	0.38	0.04	0.03	0.18	0.02	0.07	0.79	-0.04	0.04	0.39	0.01	0.02	0.63	0.03	0.04	0.44	0	0.02	0.87	0.04	0.02	0.11	-0.02	0.04	0.5	3.2e-06	9.6e-07	2.88	1.46	0.05	1.09	0.83	0.19	-1.9	2.71	0.48
		X - 23639	49515				LC/MS Pos Early	1640	134.081	0	4	0.04	0.04	0.27	0.02	0.02	0.35	0.03	0.04	0.43	0.01	0.03	0.82	0.01	0.01	0.28	0.02	0.02	0.43	0.01	0.02	0.47	0.03	0.02	0.15	0.01	0.02	0.62	8.7e-06	2.7e-06	-0.2	1.37	0.88	0.91	0.56	0.11	-0.39	1.63	0.81
		X - 23641	49517				LC/MS Pos Late	910	288.217	35.8446	4	.	.	.	.	.	.	.	.	.	.	.	.	.	.	.	.	.	.	.	.	.	.	.	.	.	.	.	.	.	.	.	.	.	.	.	.	.	.
		X - 23644	49521				LC/MS Pos Early	983	146.081	0.0793	4	0	0	0.66	0	0	0.51	0	0	0.5	0	0	0.43	0	0	0.12	0	0	0.33	0	0	0.28	0	0	0.41	0	0	0.25	0.089	0.00071	0.1	0.15	0.49	-0.07	0.06	0.23	0.01	0.2	0.94
		X - 23648	49525				LC/MS Pos Early	1656	262.103	47.1848	4	-0.01	0.01	0.12	-0.01	0.01	0.2	-0.02	0.01	0.11	-0.01	0.01	0.079	-0.01	0	0.0021	-0.01	0	0.026	-0.01	0.01	0.04	-0.01	0	0.043	-0.01	0.01	0.014	0.054	0.02	-0.13	0.19	0.51	-0.57	0.3	0.056	0.03	0.34	0.92
		X - 23649	49526				LC/MS Pos Early	1645	272.076	88.977	4	.	.	.	.	.	.	.	.	.	.	.	.	.	.	.	.	.	.	.	.	.	.	.	.	.	.	.	.	.	.	.	.	.	.	.	.	.	.
		X - 23652	49529				LC/MS Pos Early	1991	171.076	0	4	-0.02	0.01	0.072	0.01	0.01	0.25	-0.01	0.01	0.12	0	0.01	0.98	0	0	0.29	-0.01	0.01	0.037	0.01	0.01	0.34	0	0.01	0.63	-0.01	0.01	0.23	1.4e-05	0.00017	-0.17	0.35	0.63	0.11	0.29	0.7	-0.31	0.3	0.3
		X - 23655	49532				LC/MS Pos Early	2200	110.06	63.6003	4	0.02	0.02	0.21	0	0.01	0.96	-0.02	0.03	0.45	-0.01	0.02	0.66	0	0.01	0.77	0	0.01	0.99	0	0.01	0.69	0.01	0.01	0.61	-0.01	0.01	0.35	1.9e-05	5e-06	1.58	0.7	0.025	-0.08	0.34	0.8	0.16	1.04	0.88
		X - 23659	49536				LC/MS Pos Early	2449	143.118	6.7407	4	-0.01	0.02	0.77	-0.04	0.02	0.0083	-0.04	0.01	0.0098	-0.04	0.01	0.0066	-0.03	0.01	1.1e-05	-0.03	0.01	0.0074	-0.03	0.01	0.00056	-0.03	0.01	0.014	-0.04	0.01	9.5e-05	0.0025	3.4e-07	-0.91	0.84	0.28	-1.45	0.45	0.0014	-0.65	0.6	0.27
		X - 23662	49539				LC/MS Pos Early	2622	159.149	37.3513	4	0.01	0	0.21	-0.01	0	0.029	0.01	0.01	0.14	0.01	0.01	0.28	0	0	0.4	0.01	0	0.04	0	0	0.61	0	0	0.41	0.01	0	0.11	0.48	4.4e-05	-0.09	0.19	0.65	0.08	0.14	0.56	0.41	0.24	0.093
		X - 23665	49542				LC/MS Pos Early	2894	217.154	0.2379	4	0	0.02	0.95	-0.01	0.02	0.35	-0.03	0.03	0.23	0.01	0.02	0.64	0	0.01	0.64	-0.01	0.02	0.47	0	0.01	0.89	-0.01	0.01	0.37	0	0.02	0.78	1.7e-05	8.2e-08	-1.53	0.79	0.055	0.05	0.43	0.9	0.5	1.15	0.66
		X - 23666	49543				LC/MS Pos Early	2990	159.149	0.4758	4	-0.05	0.03	0.066	0	0.03	0.87	-0.01	0.01	0.39	-0.04	0.02	0.017	-0.01	0.01	0.062	-0.01	0.01	0.3	-0.03	0.01	0.034	-0.03	0.02	0.2	-0.02	0.01	0.06	0.015	2.9e-08	-1.23	1.06	0.24	0.72	0.85	0.4	-0.19	0.46	0.67
		X - 23669	49546				LC/MS Pos Early	3122	319.165	61.8557	4	0.02	0.01	0.17	0	0.01	0.95	-0.01	0.02	0.59	0	0.02	0.77	0	0.01	0.53	0.01	0.01	0.43	0	0.01	0.86	0.01	0.01	0.37	0	0.01	0.97	3.6e-05	2.6e-06	0.52	0.54	0.33	-0.22	0.4	0.57	0.09	0.85	0.92
		X - 23680	49557				LC/MS Pos Late	1049	338.232	3.0135	4	-0.03	0.02	0.16	0.02	0.02	0.31	-0.04	0.03	0.097	-0.02	0.02	0.3	-0.02	0.01	0.098	-0.04	0.02	0.014	0	0.01	0.88	0	0.01	0.95	-0.03	0.02	0.048	6.9e-07	8.8e-06	0.64	0.59	0.28	1.61	0.46	0.00049	-1.04	1.08	0.34
		X - 23739	49637				LC/MS Pos Early	1286	262.103	0.1586	4	-0.02	0.04	0.61	-0.07	0.03	0.02	-0.03	0.04	0.52	-0.08	0.03	0.0088	-0.06	0.02	0.00069	-0.02	0.03	0.45	-0.07	0.02	0.00053	-0.05	0.02	0.019	-0.06	0.02	0.011	1.6e-05	7e-09	-0.28	1.23	0.82	-0.34	0.8	0.67	-1.97	1.76	0.26
		X - 23756	49654				LC/MS Pos Late	1179	456.332	42.4266	4	-0.02	0.02	0.34	-0.03	0.01	0.0069	-0.05	0.02	0.0047	-0.01	0.01	0.5	-0.02	0.01	0.00017	-0.04	0.01	0.00035	-0.02	0.01	0.023	-0.03	0.01	0.0039	-0.02	0.01	0.028	7.6e-06	3.5e-05	0.14	0.76	0.85	-0.13	0.3	0.66	-1.37	0.59	0.021
		X - 23776	49675				LC/MS Pos Early	2275	146.117	35.1308	4	0	0.01	0.41	0	0	0.57	-0.01	0.01	0.12	-0.02	0.01	0.0091	-0.01	0	0.028	-0.01	0	0.15	-0.01	0	0.11	0	0	0.32	-0.02	0.01	0.0033	0.007	0.74	0.15	0.21	0.47	-0.2	0.1	0.048	-0.02	0.37	0.97
		X - 23780	49679				LC/MS Pos Early	2190	144.102	8.3267	4	0	0.01	0.7	0	0.01	0.57	-0.02	0.02	0.22	0	0.01	0.7	0	0	0.86	-0.02	0.01	0.14	0	0.01	0.58	0	0.01	0.58	0	0.01	0.96	1.1e-05	0.00038	-1.17	0.5	0.02	-0.11	0.2	0.57	-0.93	0.68	0.17
		X - 23782	49681				LC/MS Pos Late	1627	349.273	0	4	0	0.02	0.87	0.05	0.02	0.0041	-0.02	0.03	0.46	0.02	0.02	0.37	0.02	0.01	0.05	-0.01	0.02	0.46	0.03	0.01	0.013	0.04	0.01	0.0089	0.01	0.02	0.66	3.5e-07	9.6e-06	0.1	0.92	0.91	1.48	0.46	0.0014	-0.98	1.21	0.42
		X - 23786	49687				LC/MS Neg	5247	529.338	3.3307	4	.	.	.	.	.	.	.	.	.	.	.	.	.	.	.	.	.	.	.	.	.	.	.	.	.	.	.	.	.	.	.	.	.	.	.	.	.	.
		X - 23787	49688				LC/MS Neg	4343	383.153	51.3085	4	-0.01	0.02	0.68	0.02	0.01	0.037	-0.03	0.02	0.21	0.01	0.02	0.57	0.01	0.01	0.42	-0.02	0.01	0.21	0.02	0.01	0.074	0.01	0.01	0.16	0	0.01	1	2.1e-07	2.2e-06	-1.05	0.59	0.075	0.78	0.31	0.013	0.63	0.92	0.49
		X - 23890	49792				LC/MS Neg	2254	336.073	82.7914	4	.	.	.	.	.	.	.	.	.	.	.	.	.	.	.	.	.	.	.	.	.	.	.	.	.	.	.	.	.	.	.	.	.	.	.	.	.	.
		X - 23922	49831				LC/MS Neg	1582.3	171.066	9.199	4	.	.	.	.	.	.	.	.	.	.	.	.	.	.	.	.	.	.	.	.	.	.	.	.	.	.	.	.	.	.	.	.	.	.	.	.	.	.
		X - 23997	52025				LC/MS Pos Early	1634	223.074	4.1237	4	-0.01	0.01	0.53	0	0.01	0.71	-0.04	0.03	0.16	-0.03	0.01	0.035	-0.01	0.01	0.046	-0.01	0.01	0.27	-0.01	0.01	0.079	-0.01	0.01	0.54	-0.03	0.01	0.014	3.7e-05	0.002	-0.2	0.58	0.73	0.01	0.3	0.96	0.05	1.04	0.96
		X - 24106	52135				LC/MS Pos Late	2172	661.526	1.0309	4	-0.08	0.04	0.058	0.02	0.03	0.49	-0.06	0.07	0.35	-0.05	0.05	0.32	-0.03	0.02	0.15	-0.08	0.04	0.025	-0.01	0.03	0.85	-0.01	0.03	0.7	-0.06	0.04	0.14	5.5e-07	4.2e-07	-2.24	1.55	0.15	-0.32	0.97	0.74	-2.96	2.79	0.29
		X - 24220	52257				LC/MS Pos Early	874	153.041	57.4941	4	-0.02	0.01	0.16	0.01	0.01	0.34	0.02	0.02	0.44	0	0.02	0.91	0	0.01	0.79	-0.01	0.01	0.65	0.01	0.01	0.57	0	0.01	0.96	0.01	0.01	0.62	9.3e-07	7.4e-07	-1.23	0.55	0.028	-0.21	0.34	0.54	0.17	0.89	0.85
		X - 24243	52286				LC/MS Pos Early	1003	132.065	0.4758	4	0	0.01	0.9	0	0	0.74	-0.02	0.01	0.049	0	0.01	0.98	0	0	0.51	-0.01	0.01	0.15	0	0	0.72	0	0	0.92	-0.01	0.01	0.16	3.4e-05	0.0021	-0.36	0.3	0.24	0.08	0.13	0.55	-0.05	0.35	0.89
		X - 24293	52297				LC/MS Pos Early	1189	226.128	19.7462	4	0	0	0.4	0	0	0.45	0	0	0.82	0	0	0.017	0	0	0.017	0	0	0.46	0	0	0.016	0	0	0.23	0	0	0.074	0.65	0.26	-0.04	0.02	0.13	-0.01	0.02	0.76	-0.02	0.03	0.54
		X - 24295	52483				LC/MS Neg	1152	217.071	0.0793	4	0	0.02	0.87	-0.01	0.02	0.64	0.03	0.03	0.34	0	0.02	0.98	0	0.01	0.92	0.01	0.02	0.46	0	0.01	0.74	-0.01	0.01	0.69	0	0.02	0.79	0.00022	5.8e-08	0.84	0.79	0.29	0.27	0.47	0.57	1.65	1.2	0.17
		X - 24309	52504				LC/MS Neg	4430	321.148	1.4274	4	0.01	0.03	0.6	0	0.01	0.76	0.07	0.04	0.14	-0.01	0.02	0.83	0	0.01	0.8	0.03	0.02	0.16	-0.01	0.01	0.69	0	0.01	0.98	0.01	0.02	0.7	0.00051	1.4e-07	-0.4	0.96	0.68	-0.18	0.41	0.67	0.96	1.84	0.6
		X - 24328	52524				LC/MS Neg	1361.7	161.082	1.586	4	-0.01	0.02	0.82	0.04	0.02	0.049	-0.01	0.02	0.68	-0.01	0.02	0.58	0.01	0.01	0.35	0	0.01	0.94	0.01	0.01	0.45	0.02	0.01	0.13	0	0.01	0.91	6.3e-05	0.0004	0.23	0.9	0.8	0.36	0.53	0.5	0.26	0.75	0.73
		X - 24334	52530				LC/MS Neg	1860	415.183	55.8287	4	-0.01	0.02	0.67	-0.01	0.01	0.56	-0.03	0.02	0.15	-0.03	0.02	0.03	-0.02	0.01	0.0034	-0.02	0.01	0.1	-0.02	0.01	0.031	-0.01	0.01	0.36	-0.04	0.01	0.0047	3.4e-06	4.8e-07	-0.76	0.66	0.25	-0.65	0.37	0.079	-0.18	0.96	0.85
		X - 24337	52533				LC/MS Neg	1980	239.079	2.2998	4	-0.05	0.02	0.012	-0.08	0.01	1.6e-07	-0.01	0.02	0.76	-0.04	0.02	0.022	-0.04	0.01	4.5e-07	-0.02	0.01	0.15	-0.05	0.01	6.1e-07	-0.07	0.01	8e-09	-0.03	0.01	0.047	0.0074	3.1e-11	-0.63	0.64	0.33	-1.55	0.42	0.00023	-0.7	0.89	0.43
		X - 24339	52535				LC/MS Neg	2219	363.076	68.2791	4	0	0.02	0.81	-0.01	0.02	0.37	0.02	0.02	0.49	-0.02	0.02	0.23	-0.01	0.01	0.43	0.01	0.01	0.43	-0.02	0.01	0.15	-0.01	0.01	0.52	-0.01	0.02	0.5	0.00097	9.9e-08	-1.17	0.57	0.041	-0.1	0.46	0.83	1.15	0.94	0.22
		X - 24344	52540				LC/MS Neg	3620.4	217.017	65.8208	4	0.01	0.02	0.61	-0.03	0.02	0.048	0	0.02	0.87	-0.02	0.02	0.41	-0.01	0.01	0.13	0	0.02	0.75	-0.03	0.01	0.044	-0.02	0.01	0.16	-0.01	0.02	0.61	0.00039	9e-08	-0.45	0.73	0.54	0.32	0.45	0.47	-0.26	1.02	0.8
		X - 24346	52542				LC/MS Neg	4043.3	445.208	32.7518	4	-0.04	0.02	0.048	0	0.02	0.93	0.01	0.02	0.65	-0.01	0.01	0.093	-0.01	0.01	0.2	0	0.01	0.87	-0.01	0.01	0.15	-0.02	0.01	0.2	-0.01	0.01	0.27	0.0096	5.9e-06	-1.28	0.7	0.067	-0.07	0.51	0.9	0.11	0.74	0.88
		X - 24348	52544				LC/MS Neg	4309	299.639	19.7462	4	0	0.01	0.82	0	0.01	0.79	0	0.01	0.89	-0.03	0.01	0.0078	-0.01	0.01	0.016	-0.01	0.01	0.57	-0.02	0.01	0.019	0	0.01	0.93	-0.02	0.01	0.013	0.0093	0.0088	-0.92	0.5	0.067	0.46	0.31	0.14	-0.65	0.53	0.23
		X - 24352	52548				LC/MS Neg	4453.4	419.229	75.0991	4	0.01	0.02	0.7	-0.03	0.01	0.021	0.02	0.03	0.38	-0.02	0.02	0.34	-0.01	0.01	0.094	0.02	0.02	0.36	-0.02	0.01	0.025	-0.02	0.01	0.059	-0.01	0.01	0.6	0.00023	2e-08	0.7	0.79	0.37	0.22	0.37	0.56	-1.52	1.17	0.19
		X - 24362	52558				LC/MS Neg	4790	525.27	46.3918	4	-0.03	0.02	0.23	0	0.01	0.95	0	0.03	0.96	0	0.02	0.84	0	0.01	0.74	-0.01	0.02	0.45	0	0.01	0.99	0	0.01	0.69	0	0.01	0.93	0.00013	6.8e-05	-1.58	0.81	0.052	-0.12	0.35	0.73	0.27	1.17	0.82
		X - 24408	52637				LC/MS Pos Early	874	177.087	0.1586	4	-0.01	0.01	0.55	0	0.02	0.97	-0.02	0.02	0.32	-0.04	0.02	0.045	-0.01	0.01	0.073	-0.01	0.01	0.4	-0.02	0.01	0.12	-0.01	0.01	0.42	-0.03	0.01	0.04	0.0012	1.7e-05	0.2	0.45	0.66	0.28	0.59	0.63	-0.02	0.64	0.97
		X - 24410	52639				LC/MS Pos Early	881	116.07	19.9048	4	-0.01	0.01	0.29	0	0.01	0.72	-0.02	0.01	0.038	-0.02	0.01	0.067	-0.01	0	0.0066	-0.01	0.01	0.028	-0.01	0.01	0.17	-0.01	0.01	0.26	-0.02	0.01	0.003	0.00059	0.013	-0.38	0.28	0.18	-0.01	0.21	0.95	-0.8	0.48	0.094
		X - 24411	52640				LC/MS Pos Early	1171	116.07	24.1872	4	-0.02	0.01	0.14	-0.01	0.01	0.28	-0.02	0.01	0.03	-0.03	0.02	0.12	-0.02	0.01	0.00015	-0.02	0.01	0.0012	-0.02	0.01	0.093	-0.02	0.01	0.065	-0.02	0.01	0.0017	0.0021	0.00048	-0.3	0.47	0.53	-0.34	0.33	0.31	-0.54	0.34	0.12
		X - 24418	52647				LC/MS Neg	4704	525.269	17.2879	4	-0.04	0.02	0.0093	-0.03	0.01	0.00039	0	0.02	0.92	-0.02	0.01	0.042	-0.02	0.01	9.4e-05	-0.01	0.01	0.23	-0.02	0.01	0.00023	-0.03	0.01	2.3e-05	-0.02	0.01	0.084	0.0014	5.6e-06	-0.08	0.6	0.89	-0.5	0.22	0.023	-0.21	0.66	0.75
		X - 24422	52636				LC/MS Pos Early	1194	271.092	0.3172	4	0	0	0.62	-0.01	0.01	0.25	0	0	0.77	-0.03	0.01	0.069	0	0	0.085	0	0	0.47	-0.01	0.01	0.074	0	0	0.22	-0.01	0	0.18	0.097	0.013	-0.04	0.13	0.78	-0.21	0.2	0.29	-0.17	0.19	0.37
		X - 24425	52655				LC/MS Pos Early	2378	130.097	26.8834	4	-0.01	0.01	0.62	0	0.01	0.82	-0.01	0.03	0.63	-0.02	0.02	0.21	-0.01	0.01	0.26	-0.01	0.01	0.56	-0.01	0.01	0.34	-0.01	0.01	0.56	-0.02	0.01	0.22	0.00018	9.3e-05	-0.76	0.56	0.17	-0.11	0.34	0.75	0.44	1.03	0.67
		X - 24435	52665				LC/MS Neg	6625	465.304	4.8374	4	0.01	0.02	0.78	0.01	0.01	0.2	0	0.02	0.92	0	0.01	0.82	0	0.01	0.54	0.01	0.01	0.68	0.01	0.01	0.47	0.01	0.01	0.19	0	0.01	0.72	2.3e-05	0.00055	0.37	0.75	0.62	-0.14	0.31	0.66	-0.87	0.78	0.27
		X - 24452	52769				LC/MS Pos Early	2756	205.155	0.1586	4	-0.05	0.02	0.014	0	0.03	0.95	-0.02	0.02	0.37	-0.05	0.02	0.01	-0.02	0.01	0.015	-0.02	0.01	0.11	-0.03	0.02	0.039	-0.03	0.02	0.063	-0.03	0.01	0.031	0.0012	2.4e-08	-1.5	0.83	0.072	0.6	0.84	0.48	-0.07	0.75	0.93
		X - 24455	52772				LC/MS Pos Early	2641	237.087	5.7891	4	-0.02	0.01	0.22	0	0.01	0.88	-0.02	0.02	0.36	-0.04	0.02	0.1	-0.01	0.01	0.088	-0.02	0.01	0.12	-0.01	0.01	0.38	-0.01	0.01	0.45	-0.03	0.02	0.063	4.4e-05	1.8e-05	-0.35	0.47	0.45	0.4	0.4	0.31	-1.07	0.8	0.19
		X - 24456	52773				LC/MS Pos Early	2538	237.087	81.7605	4	.	.	.	.	.	.	.	.	.	.	.	.	.	.	.	.	.	.	.	.	.	.	.	.	.	.	.	.	.	.	.	.	.	.	.	.	.	.
		X - 24471	52788				LC/MS Pos Early	2030	173.14	0	4	-0.18	0.14	0.2	0.04	0.11	0.71	0.17	0.15	0.25	0.03	0.12	0.79	0.02	0.06	0.72	-0.03	0.1	0.78	0.05	0.08	0.56	-0.02	0.08	0.78	0.05	0.09	0.61	1.1e-06	8.8e-07	2	4.89	0.68	0.95	3.02	0.75	4.43	6.36	0.49
		X - 24473	52790				LC/MS Pos Early	1709	146.081	13.7193	4	0	0.01	0.74	0	0	0.68	-0.01	0.01	0.54	0.01	0.01	0.16	0	0	0.2	0	0.01	0.99	0	0	0.26	0	0	0.47	0.01	0.01	0.24	0.0013	0.00027	0.16	0.24	0.49	0.02	0.09	0.85	0.13	0.56	0.81
		X - 24475	52792				LC/MS Pos Early	1258	146.081	22.7597	4	0	0.01	0.58	0.01	0	0.062	-0.01	0.01	0.57	0.02	0.01	0.023	0.01	0	0.033	-0.01	0.01	0.26	0.01	0	0.0046	0	0	0.13	0.01	0.01	0.085	4.7e-06	0.0002	-0.15	0.23	0.5	0.02	0.11	0.83	-0.96	0.36	0.0081
		X - 24489	52808				LC/MS Neg	1850	357.082	98.0967	4	.	.	.	.	.	.	.	.	.	.	.	.	.	.	.	.	.	.	.	.	.	.	.	.	.	.	.	.	.	.	.	.	.	.	.	.	.	.
		X - 24493	52812				LC/MS Neg	2268	326.087	90.4837	4	.	.	.	.	.	.	.	.	.	.	.	.	.	.	.	.	.	.	.	.	.	.	.	.	.	.	.	.	.	.	.	.	.	.	.	.	.	.
		X - 24494	52813				LC/MS Neg	4131	479.228	13.3228	4	-0.02	0.01	0.1	0.01	0.01	0.29	-0.04	0.02	0.059	0	0.02	0.84	-0.01	0.01	0.34	-0.02	0.01	0.021	0.01	0.01	0.54	0	0.01	0.74	-0.01	0.01	0.27	3.4e-07	0.00016	-1.14	0.43	0.0094	0.62	0.35	0.076	0.15	0.79	0.85
		X - 24498	52817				LC/MS Neg	3039	325.092	95.9556	4	.	.	.	.	.	.	.	.	.	.	.	.	.	.	.	.	.	.	.	.	.	.	.	.	.	.	.	.	.	.	.	.	.	.	.	.	.	.
		X - 24512	52833				LC/MS Pos Early	1025	190.082	0.3172	4	-0.02	0.05	0.61	0.04	0.04	0.33	-0.08	0.07	0.23	0.07	0.05	0.18	0.02	0.02	0.54	-0.04	0.04	0.27	0.05	0.03	0.13	0.01	0.03	0.7	0.03	0.04	0.54	5.9e-07	4.3e-08	0.54	1.75	0.76	1.78	1.15	0.12	3.2	2.88	0.27
		X - 24513	52834				LC/MS Pos Early	1148	149.056	0	4	-0.19	0.06	0.00067	-0.28	0.06	1.6e-06	-0.03	0.02	0.15	-0.08	0.03	0.0016	-0.06	0.01	2.5e-05	-0.03	0.02	0.056	-0.09	0.02	2.3e-05	-0.24	0.04	2.8e-09	-0.05	0.02	0.0024	0.003	1.9e-12	-5.18	2.07	0.013	-3.69	1.49	0.014	-0.93	0.9	0.3
		X - 24518	52839				LC/MS Pos Early	2329	204.134	52.3394	4	-0.03	0.02	0.06	-0.02	0.01	0.047	-0.06	0.03	0.033	-0.04	0.02	0.0074	-0.03	0.01	1.2e-05	-0.04	0.01	0.009	-0.03	0.01	0.00079	-0.03	0.01	0.005	-0.05	0.01	0.00068	2.3e-07	5.5e-07	-1.16	0.61	0.06	-0.38	0.34	0.27	-2.13	1.16	0.069
		X - 24519	52840				LC/MS Pos Early	2458	208.064	42.3473	4	0.04	0.02	0.057	0.01	0.01	0.32	-0.08	0.02	0.00091	-0.02	0.01	0.075	-0.01	0.01	0.16	-0.03	0.02	0.048	-0.01	0.01	0.56	0.02	0.01	0.083	-0.04	0.01	0.0015	1.3e-06	0.095	-1.65	0.79	0.037	-0.22	0.33	0.51	-1.38	1.16	0.23
		X - 24527	52848				LC/MS Pos Early	2221	243.134	2.6963	4	0	0.01	0.81	-0.01	0.01	0.18	-0.01	0.01	0.14	-0.01	0.01	0.013	-0.01	0	0.0078	-0.01	0	0.27	-0.01	0	0.01	-0.01	0.01	0.21	-0.01	0	0.0078	0.07	0.00038	-1.25	0.42	0.0036	-0.08	0.2	0.68	-0.03	0.28	0.92
		X - 24539	52860				LC/MS Neg	4353	640.334	97.1451	4	.	.	.	.	.	.	.	.	.	.	.	.	.	.	.	.	.	.	.	.	.	.	.	.	.	.	.	.	.	.	.	.	.	.	.	.	.	.
		X - 24540	52861				LC/MS Neg	2955.3	261.008	74.9405	4	0.04	0.02	0.061	0.02	0.02	0.25	0.02	0.02	0.45	-0.02	0.02	0.2	0.01	0.01	0.54	0.03	0.02	0.058	0	0.01	0.75	0.02	0.01	0.064	-0.01	0.01	0.45	0.00018	4.6e-05	0.3	0.75	0.69	-0.38	0.43	0.38	0.3	1.02	0.77
		X - 24542	52863				LC/MS Neg	1674	224.057	52.2601	4	0.01	0.02	0.44	-0.02	0.01	0.083	0.05	0.02	0.025	0	0.02	0.83	0	0.01	0.95	0.03	0.01	0.023	-0.01	0.01	0.21	-0.01	0.01	0.23	0.01	0.01	0.32	0.0016	3.6e-09	0.38	0.59	0.52	-0.51	0.32	0.1	-1.48	0.93	0.11
		X - 24544	52865				LC/MS Neg	4448	411.184	4.5995	4	0	0.02	0.91	0.04	0.01	0.016	-0.02	0.03	0.56	0.02	0.02	0.3	0.02	0.01	0.028	0	0.02	0.91	0.03	0.01	0.016	0.02	0.01	0.047	0.01	0.01	0.29	9e-06	0.00012	-1.25	0.84	0.14	0.75	0.42	0.079	0.38	1.03	0.72
		X - 24545	52866				LC/MS Neg	4015	399.184	72.7201	4	0	0.02	0.79	-0.01	0.01	0.44	-0.02	0.03	0.56	-0.04	0.02	0.013	-0.02	0.01	0.031	-0.01	0.01	0.55	-0.02	0.01	0.025	0	0.01	0.66	-0.04	0.02	0.0075	5.2e-05	8.2e-05	-0.14	0.59	0.82	-0.39	0.36	0.28	-3.99	1.25	0.0017
		X - 24546	52867				LC/MS Neg	3289	231.051	14.1951	4	0.02	0.01	0.17	0.01	0.01	0.3	-0.01	0.01	0.5	-0.01	0.01	0.25	0	0.01	0.78	0	0.01	0.87	0	0.01	0.63	0.01	0.01	0.11	-0.01	0.01	0.2	0.0015	0.015	-1	0.56	0.074	0.87	0.3	0.0041	-0.23	0.56	0.68
		X - 24549	52870				LC/MS Neg	2610	202.051	0.7137	4	0	0.02	0.81	0.02	0.01	0.17	0.03	0.03	0.35	0.02	0.02	0.21	0.02	0.01	0.023	0.02	0.01	0.24	0.02	0.01	0.048	0.01	0.01	0.25	0.03	0.01	0.086	1.7e-05	4.9e-07	-0.55	0.59	0.36	0.23	0.4	0.56	1.87	1.1	0.092
		X - 24556	52877				LC/MS Neg	2318	283.119	3.0928	4	-0.03	0.02	0.073	0.04	0.02	0.034	0	0.01	0.69	-0.02	0.01	0.032	0	0	0.97	0	0.01	0.67	-0.01	0.01	0.4	0.01	0.01	0.66	0	0.01	0.57	0.036	8.8e-05	-0.31	0.7	0.65	0.89	0.47	0.061	0.09	0.28	0.74
		X - 24571	52892				LC/MS Neg	4625	303.145	86.8358	4	.	.	.	.	.	.	.	.	.	.	.	.	.	.	.	.	.	.	.	.	.	.	.	.	.	.	.	.	.	.	.	.	.	.	.	.	.	.
		X - 24575	52896				LC/MS Neg	2008	289.093	99.6035	4	.	.	.	.	.	.	.	.	.	.	.	.	.	.	.	.	.	.	.	.	.	.	.	.	.	.	.	.	.	.	.	.	.	.	.	.	.	.
		X - 24576	52897				LC/MS Neg	3184	246.95	98.8898	4	.	.	.	.	.	.	.	.	.	.	.	.	.	.	.	.	.	.	.	.	.	.	.	.	.	.	.	.	.	.	.	.	.	.	.	.	.	.
		X - 24581	52902				LC/MS Neg	3135	369.155	99.5242	4	.	.	.	.	.	.	.	.	.	.	.	.	.	.	.	.	.	.	.	.	.	.	.	.	.	.	.	.	.	.	.	.	.	.	.	.	.	.
		X - 24585	52906				LC/MS Pos Early	2613	251.139	36.5583	4	.	.	.	.	.	.	.	.	.	.	.	.	.	.	.	.	.	.	.	.	.	.	.	.	.	.	.	.	.	.	.	.	.	.	.	.	.	.
		X - 24588	52909				LC/MS Neg	2350	485.167	0	4	-0.01	0.03	0.67	-0.08	0.03	0.0055	-0.03	0.03	0.26	-0.11	0.03	0.00011	-0.06	0.01	5.8e-06	-0.03	0.02	0.19	-0.09	0.02	1e-06	-0.05	0.02	0.015	-0.08	0.02	0.00013	0.0018	1.5e-09	-2.6	1.19	0.03	-1.13	0.75	0.14	-1.82	1.24	0.15
		X - 24637	53065				LC/MS Neg	2141.8	262.013	82.7121	4	.	.	.	.	.	.	.	.	.	.	.	.	.	.	.	.	.	.	.	.	.	.	.	.	.	.	.	.	.	.	.	.	.	.	.	.	.	.
		X - 24657	53085				LC/MS Neg	3816	429.212	80.571	4	.	.	.	.	.	.	.	.	.	.	.	.	.	.	.	.	.	.	.	.	.	.	.	.	.	.	.	.	.	.	.	.	.	.	.	.	.	.
		X - 24669	53097				LC/MS Neg	4512	287.612	57.6527	4	0.01	0.01	0.43	-0.01	0.01	0.59	0.01	0.02	0.73	-0.03	0.02	0.095	-0.01	0.01	0.34	0.01	0.01	0.36	-0.02	0.01	0.086	0	0.01	0.99	-0.02	0.01	0.18	0.00048	2.5e-06	-0.51	0.56	0.36	0.32	0.38	0.4	-0.88	0.87	0.31
		X - 24686	53114				LC/MS Pos Early	1876	224.113	9.199	4	0.01	0.01	0.51	-0.02	0.01	0.065	0	0.01	0.94	-0.01	0.02	0.34	-0.01	0.01	0.11	0	0.01	0.86	-0.02	0.01	0.054	-0.01	0.01	0.21	-0.01	0.01	0.4	0.0083	2.1e-06	-0.51	0.43	0.24	-0.25	0.31	0.42	0.08	0.63	0.9
		X - 24693	53121				LC/MS Pos Early	2149.5	198.124	25.2974	4	0.01	0.01	0.63	0.01	0.01	0.018	0.04	0.02	0.1	0.02	0.01	0.015	0.02	0	9.8e-05	0.02	0.01	0.12	0.02	0.01	0.00067	0.01	0.01	0.015	0.02	0.01	0.0045	0.0012	7.1e-06	0.52	0.53	0.33	0.18	0.17	0.28	1.13	0.92	0.22
		X - 24699	53127				LC/MS Pos Early	2402.3	241.154	0.0793	4	-0.06	0.05	0.2	-0.04	0.05	0.43	-0.1	0.04	0.012	-0.08	0.03	0.007	-0.07	0.02	4.7e-05	-0.08	0.03	0.0027	-0.06	0.02	0.0081	-0.05	0.03	0.12	-0.09	0.02	0.00012	4.4e-05	2.9e-10	1.19	1.25	0.34	-1.95	1.31	0.14	-2.63	1.62	0.11
		X - 24728	53157				LC/MS Pos Early	1431	238.038	2.0619	4	-0.02	0.03	0.53	-0.06	0.02	0.015	-0.01	0.01	0.36	-0.04	0.01	0.019	-0.02	0.01	0.017	-0.01	0.01	0.38	-0.03	0.01	0.0035	-0.04	0.02	0.015	-0.02	0.01	0.048	0.044	2.2e-09	-2.23	1.06	0.037	-1.61	0.62	0.01	-0.22	0.43	0.62
		X - 24736	53172				LC/MS Pos Early	2821	189.135	57.732	4	0.02	0.01	0.2	0.02	0.01	0.099	0.05	0.02	0.039	0.04	0.02	0.021	0.03	0.01	0.00018	0.03	0.01	0.039	0.03	0.01	0.0053	0.02	0.01	0.02	0.04	0.01	0.0016	6.3e-06	1.3e-08	-0.7	0.56	0.21	0.14	0.33	0.66	0.17	1.02	0.87
		X - 24738	53214				LC/MS Pos Early	1051	160.097	41.8715	4	0	0	0.83	0	0	0.65	-0.01	0	0.0055	0	0	0.053	0	0	0.066	0	0	0.048	0	0	0.2	0	0	0.61	0	0	0.013	0.0077	0.74	-0.11	0.06	0.06	0.02	0.02	0.45	-0.08	0.1	0.43
		X - 24747	53266				LC/MS Neg	4360	321.147	28.3109	4	-0.01	0.02	0.62	0.01	0.01	0.52	0.06	0.03	0.064	0.01	0.01	0.7	0.01	0.01	0.16	0.02	0.02	0.14	0.01	0.01	0.44	0	0.01	0.61	0.01	0.01	0.24	0.014	7.8e-06	-0.61	0.76	0.42	-0.07	0.28	0.8	0.27	1.23	0.83
		X - 24748	53267				LC/MS Neg	4596	321.147	0.3172	4	0.02	0.03	0.47	-0.01	0.02	0.42	0.04	0.04	0.24	-0.02	0.02	0.44	0	0.01	0.77	0.04	0.02	0.069	-0.02	0.01	0.27	-0.01	0.01	0.69	0	0.02	0.88	0.00032	1.1e-07	-0.93	1.05	0.38	-0.73	0.51	0.15	1.06	1.61	0.51
		X - 24757	54695				LC/MS Neg	2372.7	180.066	55.9873	4	0	0.01	0.97	0	0.01	0.78	-0.01	0.02	0.6	0.01	0.02	0.47	0	0.01	0.77	0	0.01	0.84	0	0.01	0.69	0	0.01	0.91	0.01	0.01	0.64	8.1e-06	7.2e-08	-0.24	0.55	0.66	0.03	0.32	0.93	-0.41	1.03	0.69
		X - 24760	54698				LC/MS Neg	1166.7	136.497	64.7105	4	0.02	0.02	0.17	0.01	0.01	0.63	0.02	0.03	0.39	-0.02	0.02	0.22	0	0.01	0.61	0.03	0.01	0.071	0	0.01	0.69	0.01	0.01	0.25	-0.01	0.01	0.56	0.00044	2.9e-06	0.54	0.69	0.44	0.17	0.33	0.59	0.92	1.01	0.37
		X - 24765	54703				LC/MS Pos Early	1800	83.022	0	4	.	.	.	.	.	.	.	.	.	.	.	.	.	.	.	.	.	.	.	.	.	.	.	.	.	.	.	.	.	.	.	.	.	.	.	.	.	.
		X - 24767	54705				LC/MS Pos Early	2650.7	140.082	84.2189	4	.	.	.	.	.	.	.	.	.	.	.	.	.	.	.	.	.	.	.	.	.	.	.	.	.	.	.	.	.	.	.	.	.	.	.	.	.	.
		X - 24809	54837				LC/MS Pos Early	2180	217.155	4.0444	4	-0.01	0.01	0.34	0	0.01	0.97	-0.03	0.02	0.072	-0.01	0.01	0.076	-0.01	0	0.028	-0.02	0.01	0.043	-0.01	0.01	0.19	0	0.01	0.55	-0.02	0.01	0.016	5.6e-06	0.0029	-0.1	0.42	0.81	-0.29	0.21	0.18	-0.54	0.77	0.48
		X - 24811	54839				LC/MS Pos Early	2259	228.086	60.6661	4	0	0.02	0.9	-0.01	0.01	0.45	0	0.02	0.93	-0.01	0.02	0.54	-0.01	0.01	0.34	0	0.02	0.78	-0.01	0.01	0.32	-0.01	0.01	0.59	-0.01	0.01	0.52	1.8e-05	9.2e-07	0.25	0.79	0.75	0.16	0.36	0.66	-0.85	1.01	0.4
		X - 24812	54840				LC/MS Pos Early	2650	230.139	11.023	4	-0.02	0.02	0.17	0	0	0.29	-0.02	0.01	0.17	-0.01	0.01	0.21	-0.01	0	0.029	-0.02	0.01	0.014	0	0	0.14	0	0	0.17	-0.01	0.01	0.078	4e-06	0.044	-0.69	0.57	0.23	-0.14	0.08	0.089	-0.99	0.57	0.085
		X - 24831	54859				LC/MS Neg	1410.2	188.078	0	4	-0.01	0.06	0.93	0.12	0.05	0.013	0.07	0.09	0.42	0.11	0.07	0.11	0.08	0.03	0.011	0.02	0.05	0.63	0.11	0.04	0.006	0.08	0.04	0.036	0.09	0.05	0.081	4.4e-07	2.1e-07	1.92	2.31	0.41	3.26	1.32	0.014	2.21	3.54	0.53
		X - 24832	54860				LC/MS Neg	1481.8	188.078	3.7272	4	0.02	0.04	0.66	0.04	0.03	0.19	0.02	0.05	0.73	0.04	0.04	0.4	0.02	0.02	0.19	0.02	0.03	0.6	0.03	0.02	0.17	0.03	0.02	0.21	0.03	0.03	0.4	2.7e-06	1.7e-06	0.27	1.48	0.86	1.64	0.84	0.052	3.11	1.96	0.11
		X - 24849	54877				LC/MS Neg	4611	313.119	0.6344	4	0	0.02	0.93	0	0.02	0.96	0.03	0.02	0.18	-0.01	0.01	0.42	0	0.01	0.82	0.02	0.01	0.23	-0.01	0.01	0.41	0	0.01	0.88	0	0.01	0.93	0.00077	3.9e-06	1.52	0.7	0.03	0.07	0.45	0.87	0.23	0.81	0.78
		X - 24870	54977				LC/MS Pos Late	2128	719.569	0.6344	4	-0.08	0.03	0.031	0.12	0.03	7.3e-05	-0.08	0.05	0.12	0.03	0.04	0.45	0.02	0.02	0.22	-0.08	0.03	0.0055	0.08	0.02	0.00078	0.05	0.02	0.032	-0.01	0.03	0.72	1.2e-09	3.8e-07	-1.39	1.35	0.31	1.28	0.84	0.13	-6.61	2.07	0.0017
		X - 24928	55079				LC/MS Neg	3877	387.203	5.9477	4	.	.	.	.	.	.	.	.	.	.	.	.	.	.	.	.	.	.	.	.	.	.	.	.	.	.	.	.	.	.	.	.	.	.	.	.	.	.
		X - 24932	57403				LC/MS Pos Early	2323	318.129	25.5353	4	0.03	0.01	0.0083	-0.01	0.01	0.5	-0.02	0.02	0.33	-0.03	0.01	0.0095	-0.01	0.01	0.1	0.01	0.01	0.29	-0.02	0.01	0.019	0.01	0.01	0.48	-0.03	0.01	0.0038	0.067	0.047	-0.18	0.39	0.64	-0.04	0.27	0.89	0.03	0.78	0.97
		X - 24947	57714				LC/MS Neg	4518	387.185	4.4409	4	0	0.01	0.68	0.02	0.01	0.041	0.01	0.01	0.61	0	0.01	0.77	0	0	0.24	0	0.01	0.6	0	0	0.42	0.01	0.01	0.032	0	0.01	0.81	0.0075	0.012	-0.71	0.43	0.1	0.28	0.22	0.2	-0.62	0.52	0.23
		X - 24949	57716				LC/MS Neg	4973	263.202	4.3616	4	-0.01	0.01	0.44	-0.01	0.01	0.51	-0.01	0.03	0.68	-0.04	0.02	0.051	-0.02	0.01	0.042	-0.01	0.01	0.27	-0.02	0.01	0.088	-0.01	0.01	0.38	-0.03	0.02	0.035	0.00046	7.9e-05	-0.7	0.5	0.17	-0.33	0.36	0.36	-0.49	1.09	0.65
		X - 24951	57718				LC/MS Neg	5227	481.353	0.9516	4	0.04	0.02	0.031	0.02	0.01	0.11	0.05	0.02	0.038	0.02	0.02	0.2	0.03	0.01	0.00043	0.05	0.01	0.0012	0.02	0.01	0.04	0.03	0.01	0.0097	0.03	0.01	0.03	0.00084	3.2e-06	0.79	0.71	0.27	0.18	0.4	0.65	0.53	0.97	0.58
		X - 24952	57719				LC/MS Neg	5310	413.197	0	4	.	.	.	.	.	.	.	.	.	.	.	.	.	.	.	.	.	.	.	.	.	.	.	.	.	.	.	.	.	.	.	.	.	.	.	.	.	.
		X - 24969	57753				LC/MS Pos Early	2552	298.052	0	4	-0.08	0.07	0.22	-0.05	0.06	0.38	0.1	0.1	0.27	-0.02	0.08	0.81	-0.03	0.04	0.46	0.01	0.06	0.83	-0.04	0.05	0.39	-0.07	0.04	0.12	0.03	0.06	0.64	2e-06	1.9e-09	-1.56	2.5	0.53	2.19	1.65	0.18	0.56	4.06	0.89
		X - 24972	57756				LC/MS Neg	3880	385.169	51.2292	4	0.01	0.01	0.37	0.03	0.01	0.0043	-0.02	0.02	0.36	0.01	0.02	0.73	0.02	0.01	0.025	0	0.01	0.79	0.02	0.01	0.021	0.03	0.01	0.0028	0	0.01	0.99	1.7e-07	4.3e-06	0.05	0.56	0.93	0.61	0.31	0.053	-0.88	0.85	0.3
		X - 24975	57816				LC/MS Neg	2881	174.059	6.5821	4	.	.	.	.	.	.	.	.	.	.	.	.	.	.	.	.	.	.	.	.	.	.	.	.	.	.	.	.	.	.	.	.	.	.	.	.	.	.
		X - 24980	57821				LC/MS Neg	5033	391.286	73.5924	4	-0.02	0.02	0.21	0.01	0.01	0.61	0.01	0.03	0.7	-0.02	0.02	0.38	0	0.01	0.62	-0.01	0.01	0.46	0	0.01	0.78	0	0.01	0.91	-0.01	0.02	0.54	4.1e-06	2.1e-06	-0.97	0.61	0.11	0.59	0.37	0.11	-0.07	1.15	0.95
		X - 24983	57839				LC/MS Pos Early	2833	175.144	0.5551	4	-0.01	0.03	0.65	-0.02	0.02	0.12	0.02	0.04	0.7	-0.03	0.02	0.035	-0.02	0.01	0.023	0	0.03	0.91	-0.02	0.01	0.023	-0.02	0.01	0.092	-0.03	0.01	0.061	1e-05	1.3e-07	-0.35	1.19	0.77	-0.83	0.43	0.054	-0.47	1.77	0.79
		X - 25116	61689				LC/MS Pos Early	1331	252.107	0.3965	4	0.01	0.01	0.49	-0.02	0.01	0.032	0.01	0.02	0.66	-0.02	0.02	0.27	-0.01	0.01	0.11	0	0.01	0.62	-0.02	0.01	0.024	-0.01	0.01	0.18	-0.01	0.01	0.47	0.02	2.2e-06	-0.03	0.33	0.94	-0.22	0.29	0.45	0.29	0.66	0.66
[truncated: 20 more columns]
