# Supplementary material for: Serum metabolites associate with physical performance among middle-aged adults: Evidence from the Bogalusa Heart Study
Source: publisher site journal article supplement (doi:10.18632/aging.103362), 2020-06-01
Supplement: Supplementary file [file aging-v12i12-103362-supplementary-material-SD1.pdf]

## SUPPLEMENTARY FIGURES

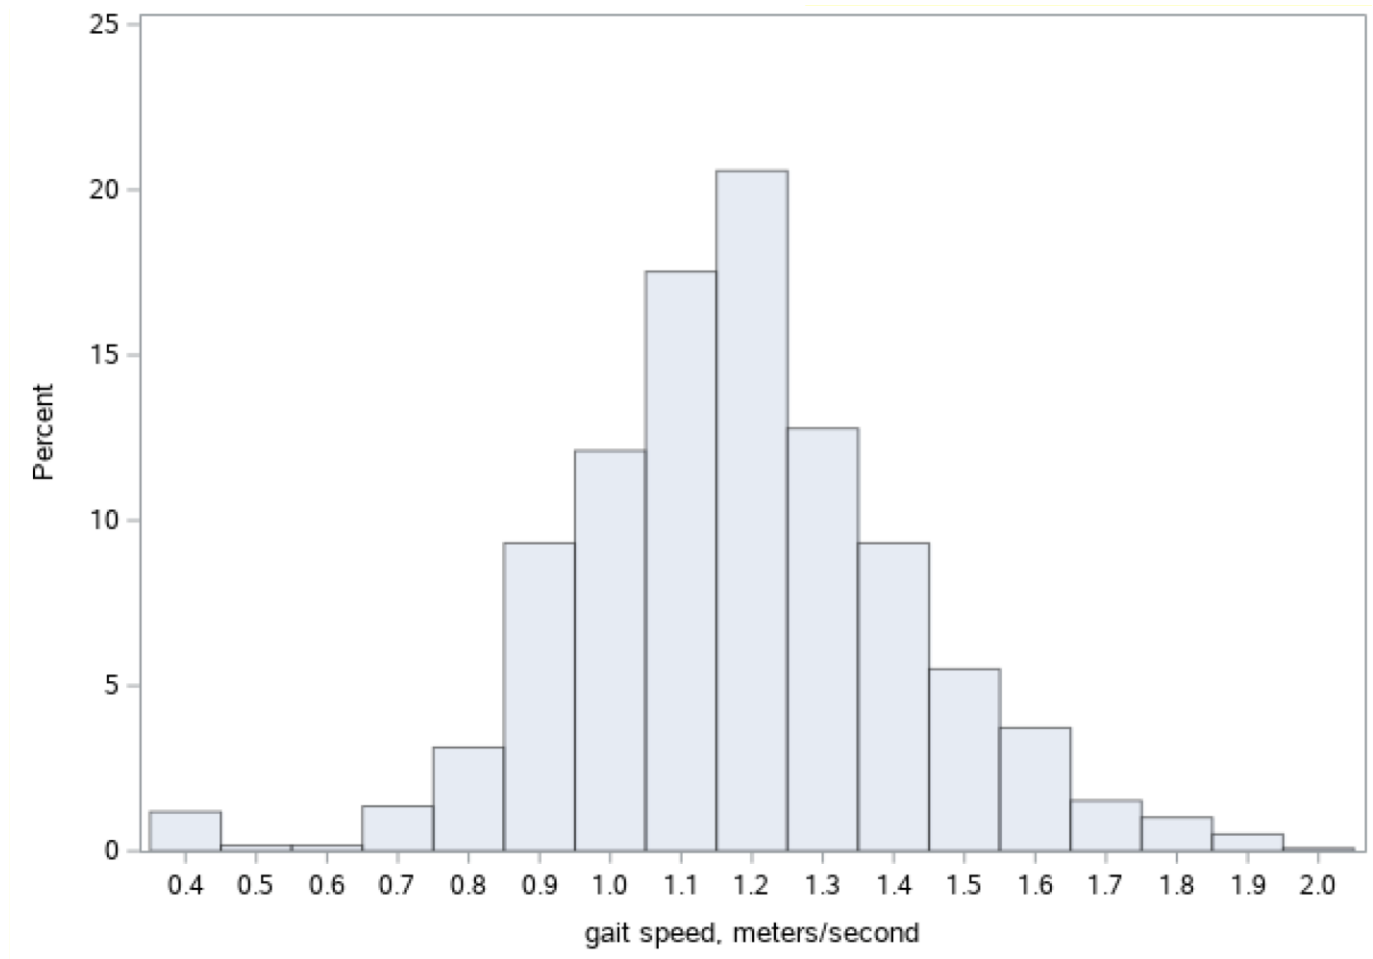

Supplementary Figure 1. Distribution of Baseline Gait Speed.

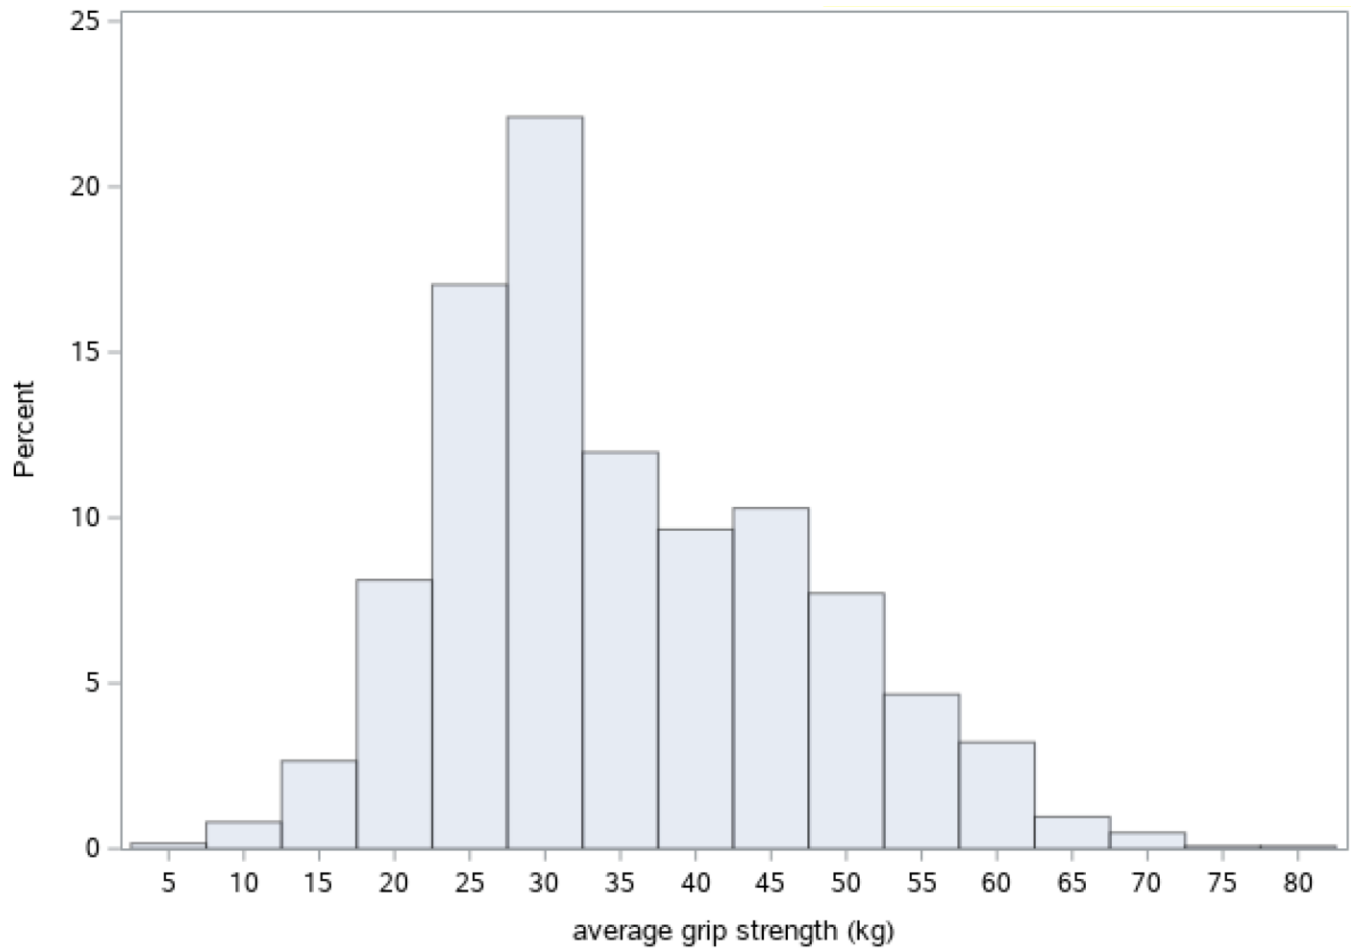

Supplementary Figure 2. Distribution of Baseline Grip Strength.

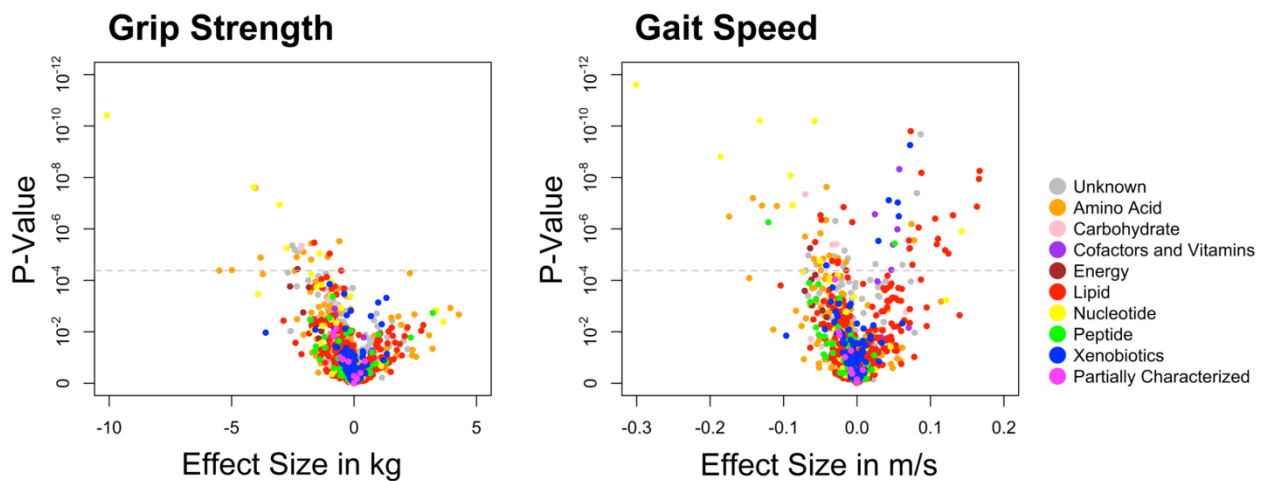

Grey=unknown; orange=amino acid; light pink=carbohydrate; purple=cofactor and vitamin; brown=energy; red=lipid; yellow=nucleotide; green=peptide; blue=xenobiotic; dark pink=partially characterized molecule.  
 BHS=Bogalusa Heart Study.  
 The grey dashed line indicates the Bonferroni corrected  $\alpha$  threshold ( $0.05/1202=4.2 \times 10^{-5}$ ) that was used for this study.

Supplementary Figure 3. P-values vs. effect sizes for grip strength and gait speed among BHS participants.

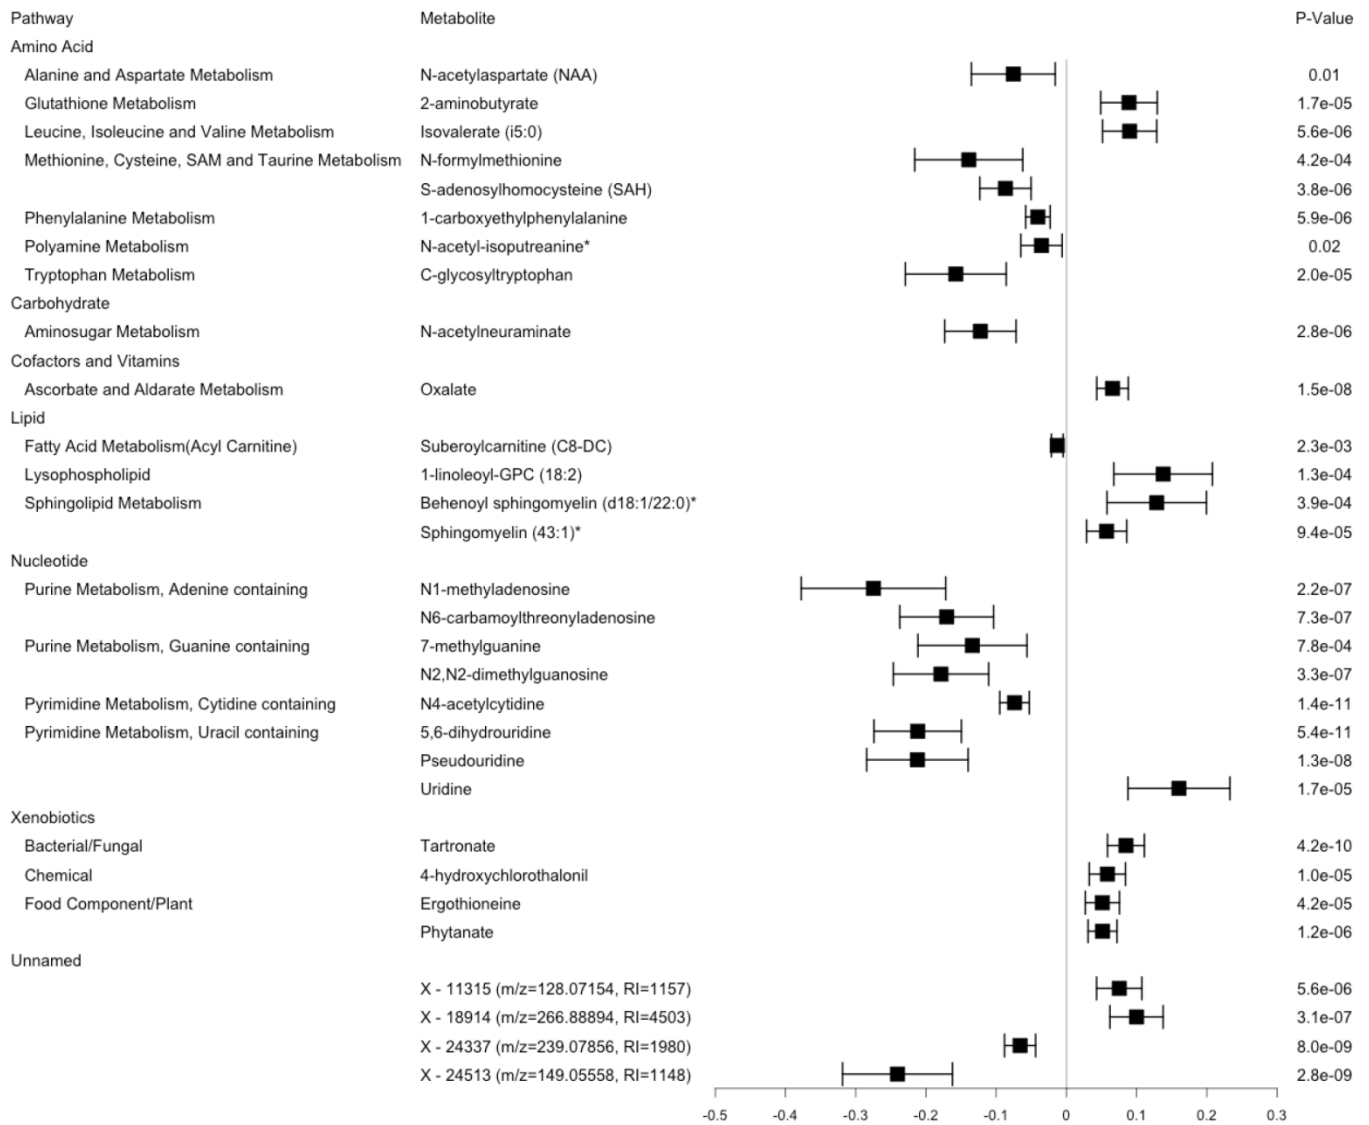

\* Indicates compounds with Metabolomics Standards Initiative confidence level 2.

**Supplementary Figure 4. Metabolites Significantly Associated with Gait Speed in Sex Stratified Analysis, among Female Participants.**

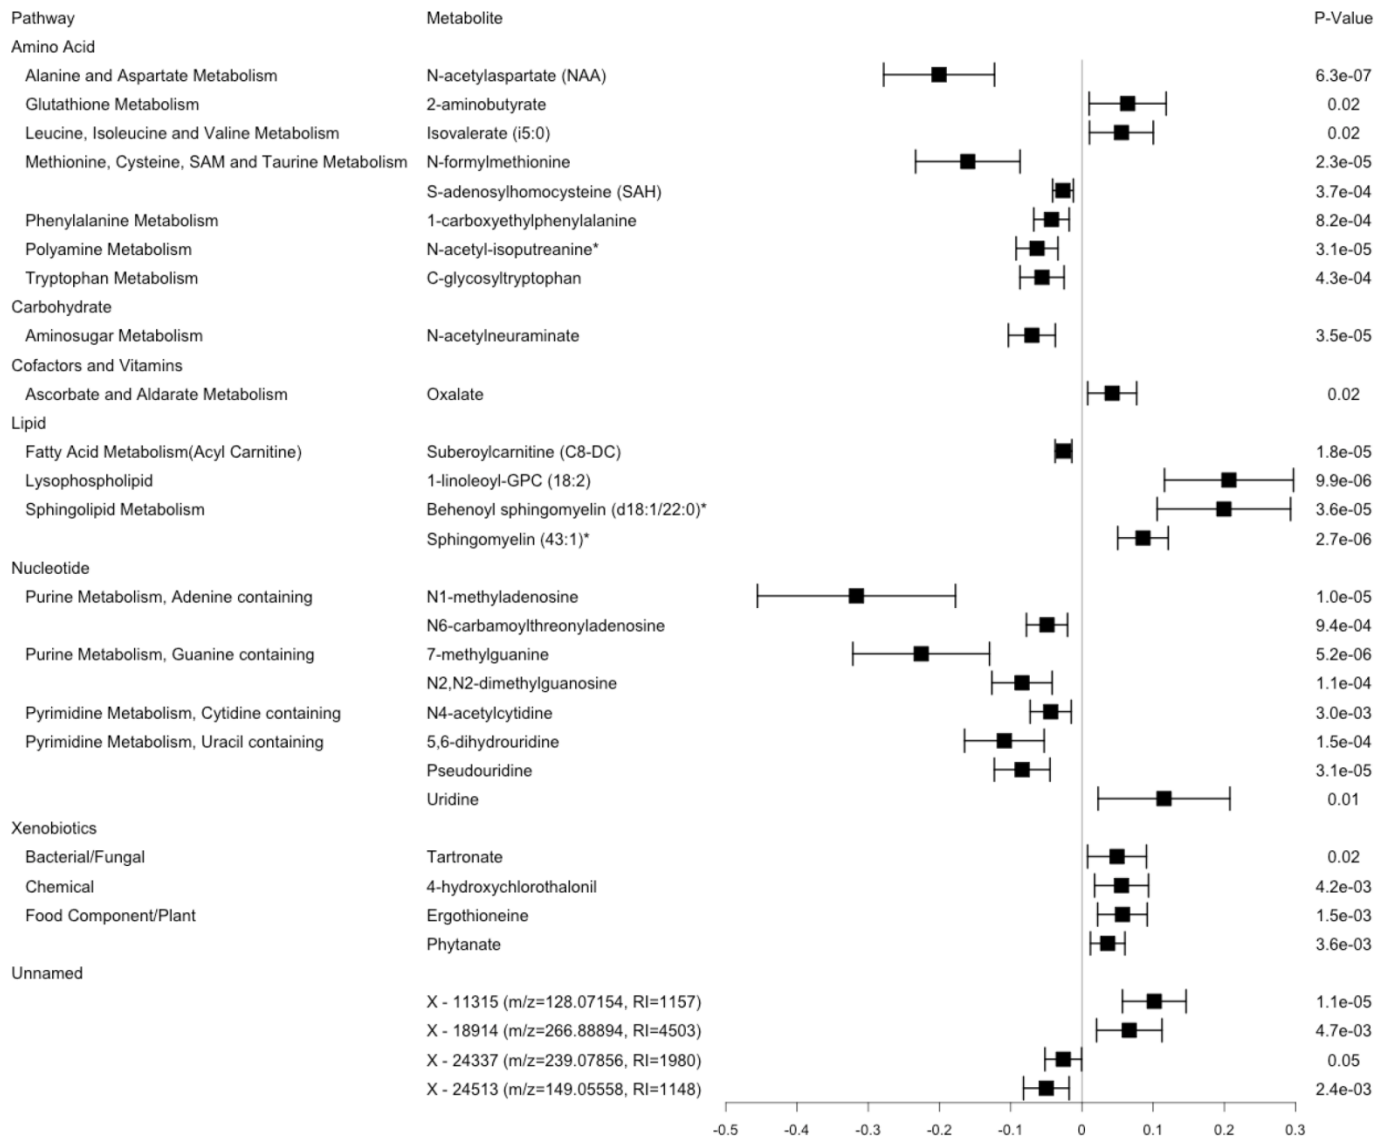

\* Indicates compounds with Metabolomics Standards Initiative confidence level 2.

**Supplementary Figure 5. Metabolites Significantly Associated with Gait Speed in Sex Stratified Analysis, among Male Participants.**

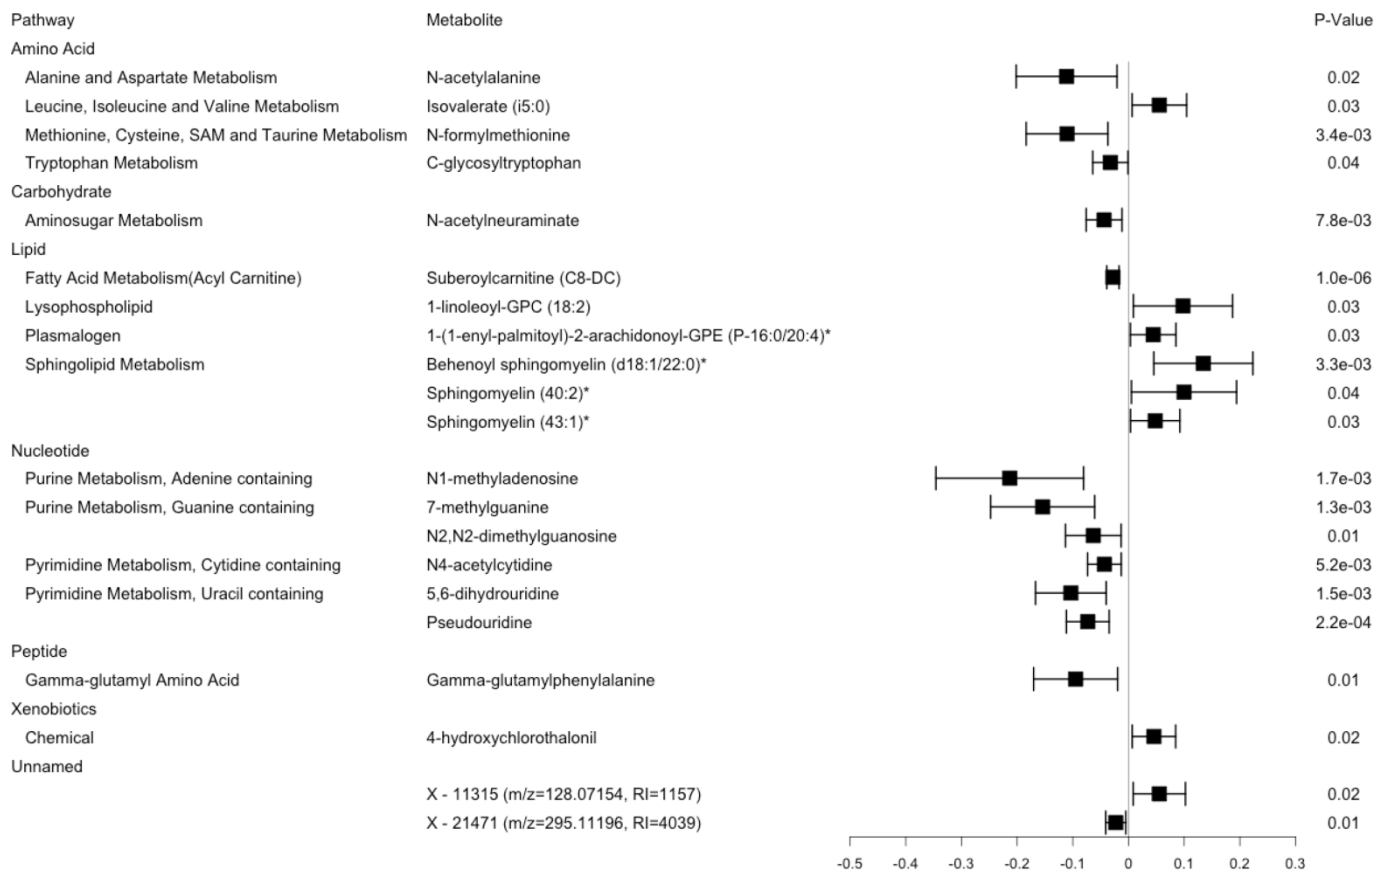

\* Indicates compounds with Metabolomics Standards Initiative confidence level 2.

**Supplementary Figure 6. Metabolites Significantly Associated with Gait Speed in Race Stratified Analysis, among Black Participants.**

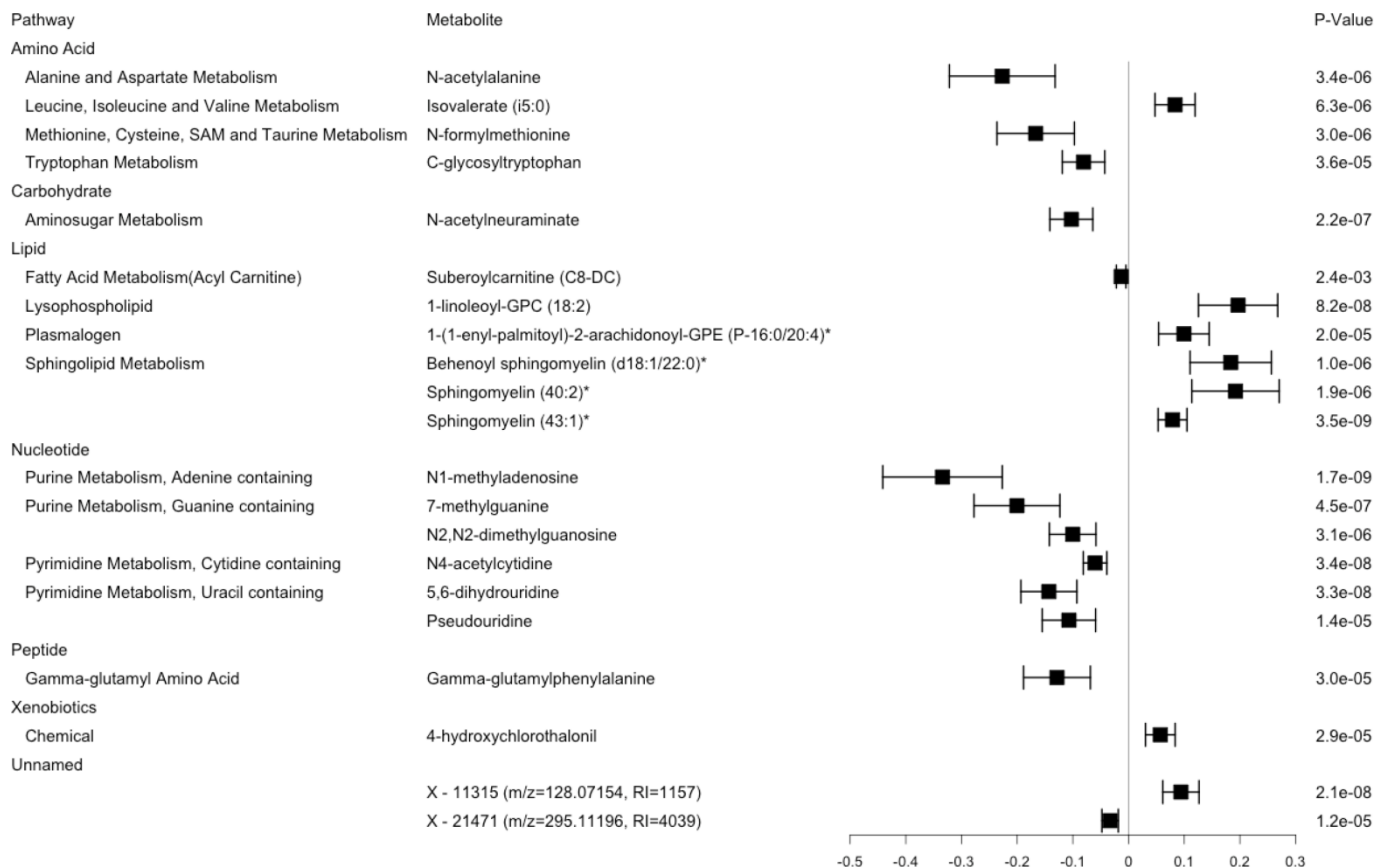

\* Indicates compounds with Metabolomics Standards Initiative confidence level 2.

**Supplementary Figure 7. Metabolites Significantly Associated with Gait Speed in Race Stratified Analysis, among White Participants.**

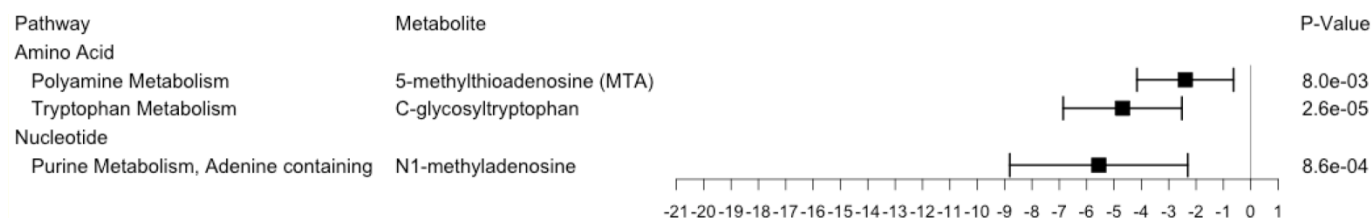

**Supplementary Figure 8. Metabolites Significantly Associated with Grip Strength in Sex Stratified Analysis, among Female Participants.**

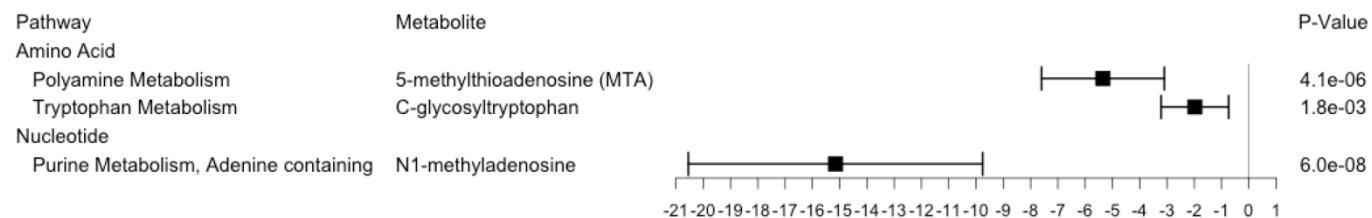

**Supplementary Figure 9. Metabolites Significantly Associated with Grip Strength in Sex Stratified Analysis, among Male Participants.**

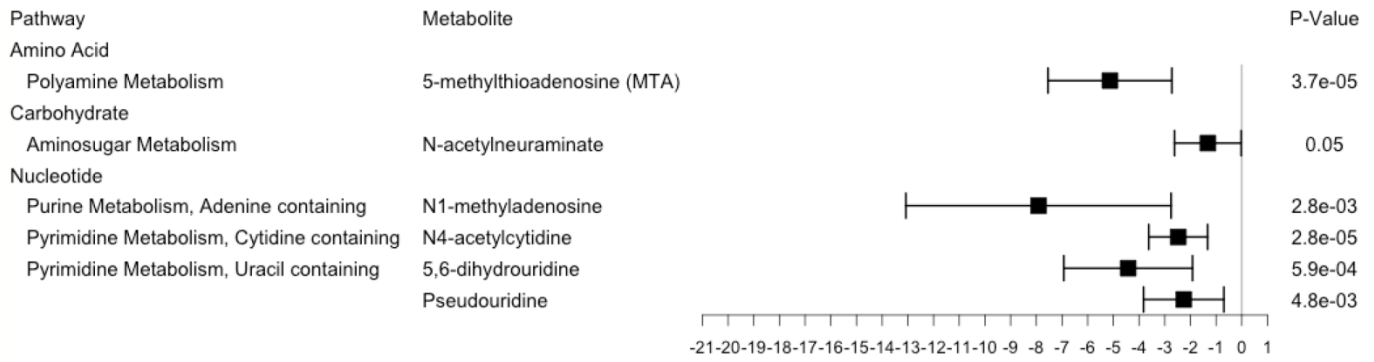

**Supplementary Figure 10. Metabolites Significantly Associated with Grip Strength in Race Stratified Analysis, among Black Participants.**

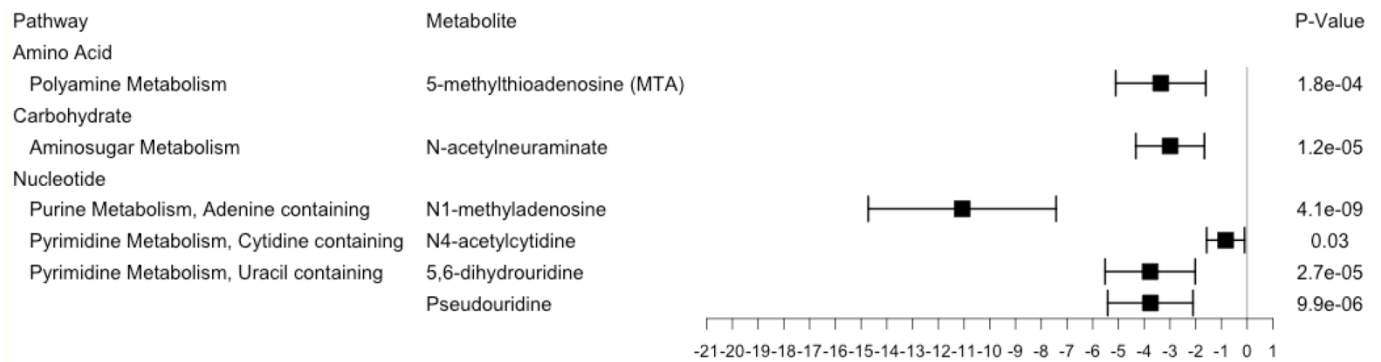

**Supplementary Figure 11. Metabolites Significantly Associated with Grip Strength in Race Stratified Analysis, among White Participants.**
